# Supplementary material for: eHealth or e-Chaos: The use of Digital Health Interventions for Health Systems Strengthening in sub-Saharan Africa over the last 10 years: A scoping review
Source: PubMed Central journal article supplement (PMC9718445; doi:10.7189/jogh.12.04090), 2022-12-03
Supplement: jogh-12-04090-s001.pdf [file jogh-12-04090-s001.pdf]

## Table of Contents

|                                                                                                                                                                      |          |
|----------------------------------------------------------------------------------------------------------------------------------------------------------------------|----------|
| <b>1.0 Online Supplementary Document .....</b>                                                                                                                       | <b>2</b> |
| Table S1: List of Digital Health Interventions in sub-Saharan Africa included in the scoping review analysis .....                                                   | 2        |
| Table S2: Supplementary material: Country Distribution of digital health interventions according to the health systems strengthening building blocks .....           | 173      |
| Table S3: Supplementary material: Digital Health Interventions used to strengthen service delivery in sub-Saharan Africa.....                                        | 175      |
| Table S4: Supplementary material: Digital Health Interventions used to strengthen health workforce in sub-Saharan Africa .....                                       | 228      |
| Table S5: Supplementary material: Digital Health Interventions used to strengthen Health Information System in sub-Saharan Africa.....                               | 234      |
| Table S6: Supplementary material: Digital Health Interventions used to strengthen Access to Essential Medicines, Vaccines, and Technology in sub-Saharan Africa..... | 257      |
| Table S7: Supplementary material: Digital Health Interventions used to strengthen Healthcare Finance in sub-Saharan Africa .....                                     | 263      |
| Table S8: Supplementary material: Digital Health Interventions used to Leadership and Governance strengthen in sub-Saharan Africa .....                              | 266      |

## 1.0 Online Supplementary Document

Table S1: List of Digital Health Interventions in sub-Saharan Africa included in the scoping review analysis

| Name/Reference/Point of contact                                          | Country | Start Date | Overview of digital health implementation                                                                                                                                                                                                                                                                                                                                                                   | HSS building block                                              |
|--------------------------------------------------------------------------|---------|------------|-------------------------------------------------------------------------------------------------------------------------------------------------------------------------------------------------------------------------------------------------------------------------------------------------------------------------------------------------------------------------------------------------------------|-----------------------------------------------------------------|
| Projecto Exemplar Elon Musk,<br>elon@tesla.com                           | Angola  | 01/01/2018 | Reminders to patients for missed appointments for malaria diagnosis follow-up                                                                                                                                                                                                                                                                                                                               | Service delivery                                                |
| IRS - Cunene Sergio Lopes,<br>sergio@mentor-initiative.net               | Angola  | 01/10/2018 | Kobo platform for a digital collection of IRS data using tablets was trialed.                                                                                                                                                                                                                                                                                                                               | Health information system, Service delivery                     |
| OpenLMIS Angola (SIGLOFA) Rebecca Alban,<br>info@openlmis.org            | Angola  | 01/03/2019 | This is an OpenLMIS system being used in provincial warehouses and hospitals. It includes requisitions, stock management, and a new reporting stack. It includes over 750 commodities. Preparatory activities are currently underway to support the national-level rollout of SIGLOFA.                                                                                                                      | Service delivery, Access to medicines, vaccines, and technology |
| Angola immunization supply chain Neeraj Thakare,<br>neeraj@logistimo.com | Angola  | 24/07/2019 | In partnership with Gavi, Logistimo's SCM platform has been deployed in 6 provinces, across ~500 health facilities to improve the visibility, tracking, and availability of vaccines from the central level to the last level. The deployment was localized keeping in mind the native context including the Portuguese language.                                                                           | Service delivery, Access to medicines, vaccines, and technology |
| Kassai Anya Fedorova,<br>Anya.Fedorova@psiangola.org                     | Angola  | 10/11/2019 | Kassai is an e-learning solution for Health professionals in Angola. It is the fastest and easiest way for health professionals to have access to training. The platform contains several multimedia courses concerning Malaria and family planning. At this stage, the platform has over 1500 health workers enrolled in 5 important provinces of Angola. It will go to national scale in the near future. | Human resources for health                                      |

|                                                                      |       |            |                                                                                                                                                                                                                                                                                                                                                                                                                                                                                                                                                                                                                                                                                                                        |                                              |
|----------------------------------------------------------------------|-------|------------|------------------------------------------------------------------------------------------------------------------------------------------------------------------------------------------------------------------------------------------------------------------------------------------------------------------------------------------------------------------------------------------------------------------------------------------------------------------------------------------------------------------------------------------------------------------------------------------------------------------------------------------------------------------------------------------------------------------------|----------------------------------------------|
| The Safe Delivery App in Benin Lauren Bellhouse, lauren@maternity.dk | Benin | 01/10/2018 | Following the successful pilot of the Safe Delivery App (SDA) French Global version as a job aid with 15 health champion trainers and 100 health care workers, the SDA is now introduced as a pre-service training tool with midwifery trainers and students in the two national midwifery schools. The job aid pilot was concluded in January 2018 with a significant increase in knowledge and confidence of the included health care workers. In collaboration with the Directorate for Maternal and Child Health, Plan International Benin, and Plan International Denmark, Maternity Foundation is in the process of creating a Benin-specific version of the App adhering to national guidelines and directives. | Service delivery, Human resources for health |
| Apprendre a Vivre Benin Uju Ofomata, uju.ofomata@oneworld.org        | Benin | 01/10/2016 | The project has three components. First, the mobile application, Ma Vie Mon Choix provides games, videos, maps of service providers, a confidential question and answer services for adolescents related to SRHR. Second, an eLearning application provides SRHR-related videos, lesson plans, activities, and discussion questions to teachers for use in class. Third, the Tro Tro Ga Ho! website provides information on gender-based violence laws and resources in Benin for service providers.                                                                                                                                                                                                                   | Service delivery                             |
| NTD LF TAS and Coverage Surveys Clara Burgert, cburgert@rti.org      | Benin | 01/03/2019 | Use of Secure Data Kit platform to collect disease prevalence survey information for LF pre-TAS, TAS surveys, and coverage evaluation surveys.                                                                                                                                                                                                                                                                                                                                                                                                                                                                                                                                                                         | Health information system                    |

|                                                                           |              |            |                                                                                                                                                                                                                                                                                                                                                                                                                                                                                                                                                                                                                                                                                                                                                                                                                |                                                                                          |
|---------------------------------------------------------------------------|--------------|------------|----------------------------------------------------------------------------------------------------------------------------------------------------------------------------------------------------------------------------------------------------------------------------------------------------------------------------------------------------------------------------------------------------------------------------------------------------------------------------------------------------------------------------------------------------------------------------------------------------------------------------------------------------------------------------------------------------------------------------------------------------------------------------------------------------------------|------------------------------------------------------------------------------------------|
| OpenLMIS Benin (SIIL) Rebecca Alban,<br>info@openlmis.org                 | Benin        | 01/01/2015 | The SIIL system was developed in collaboration with AMP and the Beninese government and partners in order to facilitate electronic data collection through the informed push system. SIIL is a locally customized variant of the OpenLMIS free software developed by a partnership of organizations working internationally to address logistical challenges. An assessment of the outcomes of the demonstration project indicated a marked improvement in performance indicators for the immunization logistics system on the Comé site. As a result, the Benin Ministry of Health took the decision to deploy the strategy, and the SIIL software, across the country. Further expansions of the system took place in 2016 and 2017, resulting in the expansion of the system to 10 additional health zones. | Service delivery, Health information system, Access to medicine, vaccines and technology |
| DHIS2 for COVID-19 Surveillance: Botswana Rebecca Potter, covid@dhis2.org | Botswana     | 08/05/2020 | The DHIS2 digital data package for COVID-19 is designed to accelerate case detection, situation reporting, active surveillance, and response in countries. The COVID-19 digital data package includes standard metadata aligned with the WHO's technical guidance on COVID-19 surveillance and has been adapted local country context and language in this implementation.                                                                                                                                                                                                                                                                                                                                                                                                                                     | Health information system                                                                |
| Integrated e-Diagnostic Approach Thierry Agagliate, tag@tdh.ch            | Burkina Faso | 01/01/2014 | IeDA provides a complete solution for delivering quality care to under-fives, supporting healthcare workers through a digital clinical job aid (on a tablet device), providing performance data to facility and district managers for management purposes, supporting coaching & continuous training of healthcare workers. IeDA has been deployed in 600+ facilities (1000 by the end of 2019) and guided 3000+ healthcare workers, delivering 120,000+ consultations/month for 1 million children per year .                                                                                                                                                                                                                                                                                                 | Service delivery, Health Information System                                              |

|                                                                             |              |            |                                                                                                                                                                                                                                                                                                                                                                                                                                                                                                                                                                                                                                                                                                                                                                                                                                                                                                                                                                                                  |                           |
|-----------------------------------------------------------------------------|--------------|------------|--------------------------------------------------------------------------------------------------------------------------------------------------------------------------------------------------------------------------------------------------------------------------------------------------------------------------------------------------------------------------------------------------------------------------------------------------------------------------------------------------------------------------------------------------------------------------------------------------------------------------------------------------------------------------------------------------------------------------------------------------------------------------------------------------------------------------------------------------------------------------------------------------------------------------------------------------------------------------------------------------|---------------------------|
| suivi des diabétiques Sanou Mohamed, sanou45@gmail.com                      | Burkina Faso | 23/05/2019 | suivi des malades à partir de leur téléphone portable                                                                                                                                                                                                                                                                                                                                                                                                                                                                                                                                                                                                                                                                                                                                                                                                                                                                                                                                            | Service delivery          |
| Suivi des malades diabitiques au Burkina Sanou Abdoulaye, sanou45@gmail.com | Burkina Faso | 29/06/2019 | Ce projet utilise les téléphones mobiles pour suivre à distance certains malades en les fournissant des informations et conseils liés à leur hygiène aliementaire                                                                                                                                                                                                                                                                                                                                                                                                                                                                                                                                                                                                                                                                                                                                                                                                                                | Service delivery          |
| Projjet Télé cardiologie Ouedraogo, sanou60@gmail.com                       | Burkina Faso | 24/05/2019 | Ce projet permet à certains structures sanitaires de l'intérieur du pays ne disposant pas de cardiologie d'utiliser ce réseau pour recevoir des avis et expertises des cardiologues de Ouagadougou                                                                                                                                                                                                                                                                                                                                                                                                                                                                                                                                                                                                                                                                                                                                                                                               | Service delivery          |
| One Health Platform Romain Tohouri, romain_tohouri@jsi.com                  | Burkina Faso | 01/10/2018 | The OH system in Burkina Faso is composed of three electronic disease surveillance platforms customized using DHIS2 to collect, transfer, and analyze all data needed by each ministry involved in the OH approach -- the MOH, MRAH, and MEEVCC. Each ministry has full control over its own database and can track as many diseases as it wishes, although a core set of agreed-upon diseases is common to all three databases. To ensure the functionality of this decentralized system, a fourth database was set up to receive real time aggregate data from the three ministry databases. An interoperability layer ensures that reported cases, suspected cases, and confirmed cases are automatically populated into the fourth database and that email and text message alerts are sent when an outbreak is detected. The electronic platform is now used as the Burkina Faso national COVID-19 data collection platform across the country. The data is collected using mobile tablets. | Health information system |
| DHIS2 for COVID-19 Surveillance: Burkina Faso Boukary, ouedbouks@gmail.com  | Burkina Faso | 08/05/2020 | Health authorities and local implementing partners configured and deployed DHIS2 for Covid-19 surveillance.                                                                                                                                                                                                                                                                                                                                                                                                                                                                                                                                                                                                                                                                                                                                                                                                                                                                                      | Health information system |

|                                                                                                                                |                   |                   |                                                                                                                                                                                                                                                                                                                                                                                                                                                                                                                                                                                                                                                                                                                                                                                                                                                                                                                                                                                                                                          |                                                    |
|--------------------------------------------------------------------------------------------------------------------------------|-------------------|-------------------|------------------------------------------------------------------------------------------------------------------------------------------------------------------------------------------------------------------------------------------------------------------------------------------------------------------------------------------------------------------------------------------------------------------------------------------------------------------------------------------------------------------------------------------------------------------------------------------------------------------------------------------------------------------------------------------------------------------------------------------------------------------------------------------------------------------------------------------------------------------------------------------------------------------------------------------------------------------------------------------------------------------------------------------|----------------------------------------------------|
| <p>Bio-fortified Value Chains for Improved Maternal and Child Nutrition (B4MCN)<br/>Bertin Nduwayo, bertin_nduwayo@wvi.org</p> | <p>Burundi</p>    | <p>01/08/2017</p> | <p>Community health workers (CHWs) in Burundi use weight and mid-upper arm circumference (MUAC) to monitor a child's level of malnutrition. Because the standards for rehabilitation are given by weight for age, CHWs found it difficult to identify children who were wasting because they were underweight for their height, and many underweight children who did not meet those thresholds were overlooked.</p> <p>Taking a multi-stakeholder approach that included input from multiple government ministries and UNICEF, B4MCN introduced the CommCare application in 2019 and trained CHWs to use the tool effectively. The approach has added great value, as it combines both weight and MUAC information readily to clearly indicate the child's nutritional status. Now, all children in the project area who suffer from malnutrition due to wasting or being underweight receive appropriate support. Encouraged by the B4MCN project's success, donors in Burundi are looking to use this solution in other programs.</p> | <p>Service delivery, Health information system</p> |
| <p>DHIS2 for COVID-19 Surveillance: Cabo Verde<br/>Rebecca Potter, covid@dhis2.org</p>                                         | <p>Cabo Verde</p> | <p>08/05/2020</p> | <p>The DHIS2 digital data package for COVID-19 is designed to accelerate case detection, situation reporting, active surveillance and response in countries. The COVID-19 digital data package includes standard metadata aligned with the WHO's technical guidance on COVID-19 surveillance and has been adapted to local country context and language in this implementation.</p>                                                                                                                                                                                                                                                                                                                                                                                                                                                                                                                                                                                                                                                      | <p>Health information system</p>                   |

|                                                                                                                                                                                              |                 |                   |                                                                                                                                                                                                                                                                                                                                                                                                                                                                                                                                                                                                                                                                                                                                                                                                                                               |                                             |
|----------------------------------------------------------------------------------------------------------------------------------------------------------------------------------------------|-----------------|-------------------|-----------------------------------------------------------------------------------------------------------------------------------------------------------------------------------------------------------------------------------------------------------------------------------------------------------------------------------------------------------------------------------------------------------------------------------------------------------------------------------------------------------------------------------------------------------------------------------------------------------------------------------------------------------------------------------------------------------------------------------------------------------------------------------------------------------------------------------------------|---------------------------------------------|
| <p>Building a national health map in a week Yaw Anokwa, yanokwa@nafundi.com</p>                                                                                                              | <p>Cameroon</p> | <p>15/12/2015</p> | <p>To build on the country's micro-planning success, the Ministry of Health chose to create a detailed and up-to-date map with important points of interest like health facilities, settlements, markets, churches/mosques, schools and health area boundaries. These locations are critical for planning immunization campaigns and the easiest way to build this national health map was with mobile data collection. The project used 400 data collectors to submit more than 80,000 forms in a week.</p>                                                                                                                                                                                                                                                                                                                                  | <p>Leadership and governance</p>            |
| <p>Implementation of a Performance-Based Financing Data System for Cameroon - using the open source tool Hesabu Mfouapon N Henock, National Data Manager of PBF, henockmfouapon@yahoo.fr</p> | <p>Cameroon</p> | <p>01/02/2017</p> | <p>Cameroon - Data System to Manage the performance based financing program including offline mobile data collection of quality of care and client satisfaction, the computation of program indicators, the calculation of incentive bonuses, the management of the PBF primary and subcontractor relationships and distribution of incentives. In addition, data is displayed publicly through open data dashboards.</p>                                                                                                                                                                                                                                                                                                                                                                                                                     | <p>Service delivery, Healthcare finance</p> |
| <p>Bafia District Hospital Armand Mpassy-Nzoumba, armandmpassy@yahoo.com</p>                                                                                                                 | <p>Cameroon</p> | <p>01/01/2018</p> | <p>GNU Health was successfully implemented at the Bafia District Hospital as part of WHO's the strategy in Cameroon to strengthen the national health system in Cameroon. The Bafia hospital serves as a pilot project for the implementation of the strategy. The project has made it possible to:</p> <ul style="list-style-type: none"> <li>-improving the quality of patient care</li> <li>-improving hospital management</li> <li>-improving health prevention</li> <li>-improving health statistics</li> <li>- improving the capacity and productivity of the hospital's health care staff</li> </ul> <p>We have deployed the system in the following hospital units:<br/>Management, Cashier, Outpatient unit, Mother-Child Consultation, Inpatient unit, Medical Analysis Laboratory, Maternity, Neonatology, HIV/AIDS care unit.</p> | <p>Service delivery</p>                     |

|                                                                                                |          |            |                                                                                                                                                                                                                                                                                                                                                                                                                                                                                                                                                                                                                                                                                                                                                           |                           |
|------------------------------------------------------------------------------------------------|----------|------------|-----------------------------------------------------------------------------------------------------------------------------------------------------------------------------------------------------------------------------------------------------------------------------------------------------------------------------------------------------------------------------------------------------------------------------------------------------------------------------------------------------------------------------------------------------------------------------------------------------------------------------------------------------------------------------------------------------------------------------------------------------------|---------------------------|
| Bikop Health Center Armand MPASSY, GNU Solidario, armandmpassy@yahoo.com                       | Cameroon | 09/03/2017 | <p>As part of its strategy to support the health system in Cameroon, the Recover Foundation has initiated a program to support the development of non-profit hospitals. Thus, it initiated the computerization project of the Bikop hospital in cooperation with GNU Solidario. The project aims to :</p> <ul style="list-style-type: none"> <li>-improving the quality of care</li> <li>-improvement of hospital management</li> <li>-the improvement of health prevention</li> </ul> <p>This project will serve as a pilot for the implementation of hospital management systems in other hospitals supported by the Recover Foundation. The project was developed on the basis of GNU Health, a health information and hospital management system.</p> | Service delivery          |
| DHIS2 for COVID-19 Surveillance: Cameroun (in development) Rebecca Potter, covid@dhis2.org     | Cameroon | 08/05/2020 | The DHIS2 digital data package for COVID-19 is designed to accelerate case detection, situation reporting, active surveillance and response in countries. The COVID-19 digital data package includes standard metadata aligned with the WHO's technical guidance on COVID-19 surveillance and has been adapted to local country context and language in this implementation.                                                                                                                                                                                                                                                                                                                                                                              | Health information system |
| Klarah Ginyu Innocentia Kwalar, hello@klarah.com                                               | Cameroon | 19/10/2021 | We use mobile applications and dashboards to match nurses to patients based on patient need, carer experience and their proximity to each other.                                                                                                                                                                                                                                                                                                                                                                                                                                                                                                                                                                                                          | Service delivery          |
| Suivi de de la vaccination des enfants de moisn d'un an Sessouma Abdoulaye, sesabdnaz@yahoo.fr | Chad     | 01/06/2019 | Le projet consistera à colectionner les données de vaccination sur les enfants sur une période d'un an                                                                                                                                                                                                                                                                                                                                                                                                                                                                                                                                                                                                                                                    | Health information system |



|                                                                                                                                                            |                                              |                   |                                                                                                                                                                                                                                                                                                                                                                                                                                                                                                                                                                                                                                                                                                                                                                                                                                                                                                                                                                       |                                                                     |
|------------------------------------------------------------------------------------------------------------------------------------------------------------|----------------------------------------------|-------------------|-----------------------------------------------------------------------------------------------------------------------------------------------------------------------------------------------------------------------------------------------------------------------------------------------------------------------------------------------------------------------------------------------------------------------------------------------------------------------------------------------------------------------------------------------------------------------------------------------------------------------------------------------------------------------------------------------------------------------------------------------------------------------------------------------------------------------------------------------------------------------------------------------------------------------------------------------------------------------|---------------------------------------------------------------------|
| <p>mHealth with ESPEN Collect REBOLLO<br/>         POLO Maria, rebolopolom@who.int</p>                                                                     | <p>Congo</p>                                 | <p>01/01/2015</p> | <p>ESPEN has developed a mobile data collection tool called ESPEN Collect. ESPEN Collect is a tool for the national programs in WHO's AFRO region.</p> <p>The application is compatible with Android devices and maintained. It is using a secured server to store the data (PostgreSQL). It uses survey forms designed using the XLSform or XML form syntax. Those forms are compatible with ODK ecosystem (Tropical data, Kobo Collect, ESPEN Collect, etc.)</p> <p>For any disease-specific survey, ESPEN and partners will provide scientific review of protocols, standardized training, real-time data management, and support to field supervisors, and the results of the survey will immediately be available on the ESPEN portal and incorporated into automated processes to produce the EPIRF.</p>                                                                                                                                                        | <p>Health information system</p>                                    |
| <p>The Prevention Pack Program: ensuring availability of post-rape medicines in rural clinics<br/>         Jean Armas, jean.armas@globalstrategies.org</p> | <p>Congo, the Democratic Republic of the</p> | <p>01/03/2013</p> | <p>The Prevention Pack program improves access to HIV prophylaxis, emergency contraception and antibiotics for rape survivors. The program combines community sensitization about post-rape medical care with the provision of a pre-bundled post-rape medical kit (the Prevention Pack) and the implementation of a cloud-based, GPS-enabled inventory management system called Logistimo. The project was originally implemented in 2013 at 12 rural clinics in the South Kivu Province and has now expanded to 45 sites in partnership with IMA World Health. The data manager calls all sites daily to determine demand for post-rape care and Prevention Pack consumption. Inventory data is entered into Logistimo and project personnel use the consumption rate, trends and geolocation of sites to guide Prevention Pack restocking strategy. To date, there have been zero medication stock outs. To learn more, read our article in BMJ Global Health:</p> | <p>Service delivery, Access to medicine, vaccine and technology</p> |

|                                                                                                                                                                                                        |                                       |            |                                                                                                                                                                                                                                                                                                                                                                                                                                                                                                                                                                                                                                                                                                                                                                                                                                                                                                                                                                                                                                      |                           |
|--------------------------------------------------------------------------------------------------------------------------------------------------------------------------------------------------------|---------------------------------------|------------|--------------------------------------------------------------------------------------------------------------------------------------------------------------------------------------------------------------------------------------------------------------------------------------------------------------------------------------------------------------------------------------------------------------------------------------------------------------------------------------------------------------------------------------------------------------------------------------------------------------------------------------------------------------------------------------------------------------------------------------------------------------------------------------------------------------------------------------------------------------------------------------------------------------------------------------------------------------------------------------------------------------------------------------|---------------------------|
|                                                                                                                                                                                                        |                                       |            | <a href="http://bit.ly/2v0HZaQ">http://bit.ly/2v0HZaQ</a> or visit us on the web at:<br><a href="http://bit.ly/2v3Bkg5">http://bit.ly/2v3Bkg5</a>                                                                                                                                                                                                                                                                                                                                                                                                                                                                                                                                                                                                                                                                                                                                                                                                                                                                                    |                           |
| Connecting persons seeking information about HIV/AIDS to HIV medical and social service organizations Jean Armas, <a href="mailto:jean.armas@globalstrategies.org">jean.armas@globalstrategies.org</a> | Congo, the Democratic Republic of the | 01/09/2014 | Foundation Femme Plus (FFP), a DRC-based non-profit, partnered with us to create a digital resource map and toll-free information hotline to help connect community members seeking information about HIV/AIDS to HIV medical and social services in Bukavu, DRC. FFP visited medical and social service organizations serving persons living with HIV/AIDS (PLWHA) throughout Bukavu and recorded contact information, service availability and GPS coordinates. The data was collected offline with tablets using a mobile data collection tool. The online resource map was created using a geographic information system software called CartoDB. The map is continuously validated and updated by FFP and their government partner to ensure the map is always kept current. In early 2017, the toll-free hotline was activated. Based on the content of the call, FFP operators then provided callers with the physical addresses and phone numbers of local community resources, such as confidential HIV testing facilities. | Service delivery          |
| Meilleur santé accessible à tous EPENGE DJONGA EMMANUEL, <a href="mailto:Falbalardc@gmail.com">Falbalardc@gmail.com</a>                                                                                | Congo, the Democratic Republic of the | 12/04/2019 | Congo medika est une application médicale pour smartphone qui facilite la mise en relation entre un patient et un médecin selon le problème de santé identifié: elle permet donc une consultation à domicile ou à l'hôpital . Elle permet en outre la livraison à domicile des médicaments et la publication d'informations de santé accessible à tous.                                                                                                                                                                                                                                                                                                                                                                                                                                                                                                                                                                                                                                                                              | Service delivery          |
| DHIS2 for COVID-19 Surveillance: Congo DRC (in development) Rebecca Potter, <a href="mailto:covid@dhis2.org">covid@dhis2.org</a>                                                                       | Congo, the Democratic Republic of the | 08/05/2020 | The DHIS2 digital data package for COVID-19 is designed to accelerate case detection, situation reporting, active surveillance and response in countries. The COVID-19 digital data package includes standard metadata aligned with the WHO's technical guidance on COVID-19 surveillance and has been adapted to local                                                                                                                                                                                                                                                                                                                                                                                                                                                                                                                                                                                                                                                                                                              | Health information system |

|                                                                                        |               |            |                                                                                                                                                                                                                                                                                                                                                                                                                                                                                                                                                                                                                                                                                                                                |                                                                |
|----------------------------------------------------------------------------------------|---------------|------------|--------------------------------------------------------------------------------------------------------------------------------------------------------------------------------------------------------------------------------------------------------------------------------------------------------------------------------------------------------------------------------------------------------------------------------------------------------------------------------------------------------------------------------------------------------------------------------------------------------------------------------------------------------------------------------------------------------------------------------|----------------------------------------------------------------|
|                                                                                        |               |            | country context and language in this implementation.                                                                                                                                                                                                                                                                                                                                                                                                                                                                                                                                                                                                                                                                           |                                                                |
| OpenELIS Global in Cote d'Ivoire Casey Iiams-Hauser, caseyi@uw.edu                     | Côte d'Ivoire | 01/01/2011 | OpenELIS is used to improve the quality of lab results and make producing high quality work easier for the users. Users are primarily medical lab personnel. Lab Technicians, Reception, Biologists and Management. The data links to a national dashboard which allows lab data to be used in decision making by a wide variety of stakeholders.                                                                                                                                                                                                                                                                                                                                                                              | Service delivery                                               |
| OpenLMIS Cote d'Ivoire (eSIGL) Rebecca Alban, info@openlmis.org                        | Côte d'Ivoire | 01/07/2013 | In late 2014, a series of workshops and meetings were held with stakeholders and subject matter experts to develop and validate system and functional requirements to guide the configuration of the electronic LMIS. The objective of eSIGL is to enable the direct customers (health districts and hospitals) of the Central Medical Store of Côte d'Ivoire (NPSP-CI) to place orders and to provide reports on the management of drugs.                                                                                                                                                                                                                                                                                     | Access to medicines, vaccines and technology, Service delivery |
| COVID-19 Vaccine Allocation App Anubhuti Mishra, anubhuti.mishra@thepalladiumgroup.com | Côte d'Ivoire | 18/10/2021 | COVID-19 vaccination poses an unprecedented challenge to country governments. Countries need to rapidly vaccinate their susceptible populations across geographic regions under complex infrastructure, supply, and demand constraints. This formidable task requires detailed planning and complex allocation of limited resources, with flexibility and adaptation as difficulties arise. Thus, our product is targeted at ministries of health in low- and middle-income countries (LMICs) to support their decision-making. We have a deep understanding of the needs and challenges of healthcare systems in LMIC, which gives us a unique advantage in building a customized product that is affordable and easy to use. | Service delivery, Health information system                    |

|                                                                                                     |          |            |                                                                                                                                                                                                                                                                                                                                                                                                                                                                                               |                                              |
|-----------------------------------------------------------------------------------------------------|----------|------------|-----------------------------------------------------------------------------------------------------------------------------------------------------------------------------------------------------------------------------------------------------------------------------------------------------------------------------------------------------------------------------------------------------------------------------------------------------------------------------------------------|----------------------------------------------|
| DHIS2 for COVID-19 Surveillance: Djibouti<br>Rebecca Potter, covid@dhis2.org                        | Djibouti | 08/05/2020 | The DHIS2 digital data package for COVID-19 is designed to accelerate case detection, situation reporting, active surveillance and response in countries. The COVID-19 digital data package includes standard metadata aligned with the WHO's technical guidance on COVID-19 surveillance and has been adapted to local country context and language in this implementation.                                                                                                                  | Health information system                    |
| Hiwot: Addressing Maternal & Neonatal Health<br>Stefanie Kot, skot@d-tree.org                       | Ethiopia | 01/10/2017 | A child and newborn digital health system for use by Health Extension Workers as they assess, refer and follow up with sick children. The system includes iCCM and newborn visits, immunization reminders and documentation, e-learning tools, on-app monthly reports, referral and follow-up reminders, and a supervisory system. As part of the project, a dashboard has been created to provide patient level data to health workers and their supervisors, as well as government reports. | Service delivery, Health information system  |
| OppiaMobile<br>Alex Little,<br>consult@alexlittle.net                                               | Ethiopia | 01/08/2013 | Delivering a digital version of the FMOH national curriculum for the upgrade training of 160 Health Extension Workers, enhanced with additional video and quiz content, and a common/open platform (OppiaMobile). Few of the HEWs had access to the hardcopy versions of the curriculum and so limited opportunity to review and practice. The HEWs were followed up for a year after the training was completed, to evaluate how the skills learned were being put into practice.            | Service delivery, Human resources for health |
| Medical Incident Reporting System Innovation (MIRSI)<br>Fiseha Tesfaw,<br>fiseha.tesfaw@jhpiego.org | Ethiopia | 01/03/2017 | Project aims to provide a medical incident reporting system. The current system is not anonymous, is punitive, or not in place at all, an easier, technology supported voluntary medical incidents reporting system was necessary. Project has been tasted in six tertiary level hospitals and proved the technology driven approach has given the number of incidents reported a huge boost.                                                                                                 | Service delivery                             |

|                                                                                                                         |          |            |                                                                                                                                                                                                                                                                                                                                                                                                                                                                                                          |                                                              |
|-------------------------------------------------------------------------------------------------------------------------|----------|------------|----------------------------------------------------------------------------------------------------------------------------------------------------------------------------------------------------------------------------------------------------------------------------------------------------------------------------------------------------------------------------------------------------------------------------------------------------------------------------------------------------------|--------------------------------------------------------------|
| Blood Safety Strengthening Programme: Blood Safety Information System (BSIS) Rhonwyn Cornell, rhonwyn.cornell@jembi.org | Ethiopia | 01/12/2016 | Safe blood is used to treat postpartum haemorrhage, childhood malaria, severe anemia, trauma and surgery. The BSSP develops and implements BSIS, an open source system designed to manage donor and donation information from the point of donation to transfusion. BSIS is for resource-limited blood services and supports AfSBT accreditation processes. Our implementations follows international good practice, building local capacity within the blood services to use, manage and maintain BSIS. | Service delivery                                             |
| VERS Federal Ministry of Health, dha@moh.gov.et                                                                         | Ethiopia | 01/05/2017 | VERS stands for Vital Events Registration System. It is used to register 4 major life events (birth, death, marriage, and divorce), and generate various reports. It is also used to check if events registered are current (events registered within the standard period).                                                                                                                                                                                                                              | Health information system                                    |
| Tenaye Federal Ministry of Health, dha@moh.gov.et                                                                       | Ethiopia | 01/01/2018 | Educational platform for sexual and reproductive health, mental health adolescent                                                                                                                                                                                                                                                                                                                                                                                                                        | Service delivery                                             |
| Tena PIMS Federal Ministry of Health, dha@moh.gov.et                                                                    | Ethiopia | 01/08/2017 | Patient information management system designed to manage all services in the hospital fully avoid paper work activities                                                                                                                                                                                                                                                                                                                                                                                  | Service delivery, Health information system                  |
| SuperHIM (Super HIMS health information management system) Federal Ministry of Health, dha@moh.gov.et                   | Ethiopia | 01/10/2017 | SuperHIMS is an integrated health management system developed by bet tech institute of technology. The system incorporates card room, triage, different specialized opd, laboratory, imaging and generate many types of reports.                                                                                                                                                                                                                                                                         | Service delivery                                             |
| SmartEMS (Samrt Electronic Medical System) Federal Ministry of Health, dha@moh.gov.et                                   | Ethiopia | 01/01/2017 | Smart EMS is software system design to automate work, record management and reporting of small to large clinics and hospitals.                                                                                                                                                                                                                                                                                                                                                                           | Service delivery, Health information system                  |
| RI (routine immunization dashboard) Federal Ministry of Health, dha@moh.gov.et                                          | Ethiopia | 01/09/2016 | Vaccine Performance measurement tool                                                                                                                                                                                                                                                                                                                                                                                                                                                                     | Health information system                                    |
| Quntimed and Quantitb, Federal Ministry of Health, dha@moh.gov.et                                                       | Ethiopia | 01/07/2018 | Forecasting of medicine and supplies                                                                                                                                                                                                                                                                                                                                                                                                                                                                     | Service delivery, Access to medicine, vaccine and Technology |

|                                                                                              |          |            |                                                                                                                                                                                                                                                                                           |                                                              |
|----------------------------------------------------------------------------------------------|----------|------------|-------------------------------------------------------------------------------------------------------------------------------------------------------------------------------------------------------------------------------------------------------------------------------------------|--------------------------------------------------------------|
| PRS (Patient Registration System) Federal Ministry of Health, dha@moh.gov.et                 | Ethiopia | 01/01/2016 | PRS is an easy and simple system designed and developed by Jimma university ICT staff and only used to register 2 things: patient data like name and address; and bio data of a patient like a disease encountered. And generally it was designed after the failure of smart care system. | Health information system, Service delivery                  |
| Providers System Federal Ministry of Health, dha@moh.gov.et                                  | Ethiopia | 01/01/2018 | Information about who used the insurance on the providers                                                                                                                                                                                                                                 | Healthcare Financing                                         |
| PrimeCare electronic health record Federal Ministry of Health, dha@moh.gov.et                | Ethiopia | 01/05/2014 | The PrimeCare electronic health record is a desktop application used to record and manage patient information. Currently, the app is used only for patient card registration and retrieval.                                                                                               | Health information system, Service delivery                  |
| Pipeline Federal Ministry of Health, dha@moh.gov.et                                          | Ethiopia | 01/07/2018 | To monitor the procurement and shipment status of medicines and supplies                                                                                                                                                                                                                  | Access to medicine, vaccine and technology, Service delivery |
| PaxscanL06 Federal Ministry of Health, dha@moh.gov.et                                        | Ethiopia | 01/10/2017 | Reading radiology images                                                                                                                                                                                                                                                                  | Service delivery                                             |
| Patient Registration Software Federal Ministry of Health, dha@moh.gov.et                     | Ethiopia | 01/07/2018 | To register patient medical record                                                                                                                                                                                                                                                        | Service delivery, Health information system                  |
| PACS (Picture Archiving and Communication System) Federal Ministry of Health, dha@moh.gov.et | Ethiopia | 01/02/2018 | Collect and share an image of radiography                                                                                                                                                                                                                                                 | Service delivery                                             |
| OTRS (Online Ticket Registration System) Federal Ministry of Health, dha@moh.gov.et          | Ethiopia | 01/01/2018 | To provide an interface for internal maintenance and support. Using this application, users request hardware and software maintenance and troubleshooting by filling a form.                                                                                                              | Service delivery                                             |
| Orbit Health Federal Ministry of Health, dha@moh.gov.et                                      | Ethiopia | 01/09/2015 | Enables to capture information about kidney donor and recipients and manage all processes through kidney operations                                                                                                                                                                       | Service delivery                                             |
| OR management system Federal Ministry of Health, dha@moh.gov.et                              | Ethiopia | 01/12/2016 | OR Schedule, progress, reports                                                                                                                                                                                                                                                            | Service delivery                                             |
| Open Clinic Federal Ministry of Health, dha@moh.gov.et                                       | Ethiopia | 01/12/2016 | A general hospital management system including financial transaction, admission, opd, in patient service, private, public, credit, debits and extra services. Generally wonderful system for EMR                                                                                          | Service delivery, Health information system                  |

|                                                                                              |          |            |                                                                                                                                                                                |                                                              |
|----------------------------------------------------------------------------------------------|----------|------------|--------------------------------------------------------------------------------------------------------------------------------------------------------------------------------|--------------------------------------------------------------|
| OPAC (Koha software open public access catalogue) Federal Ministry of Health, dha@moh.gov.et | Ethiopia | 01/02/2017 | To give detailed status of electronic health books and number of books in the library                                                                                          | Human resources for health                                   |
| NHDD Federal Ministry of Health, dha@moh.gov.et                                              | Ethiopia | 01/04/2017 | Captures the definition of data elements, indicators and the relationship between those elements to improve the MOH ability to manage data recording and reporting guidelines. | Health information system                                    |
| National residency matching Federal Ministry of Health, dha@moh.gov.et                       | Ethiopia | 01/05/2017 | Online entrance examinations for general practitioners (GP)                                                                                                                    | Human resources for health                                   |
| MRIS Federal Ministry of Health, dha@moh.gov.et                                              | Ethiopia | 01/07/2018 | Multi sectoral report on HIV AIDS                                                                                                                                              | Health information system                                    |
| mHealth Federal Ministry of Health, dha@moh.gov.et                                           | Ethiopia | 01/01/2017 | To create a two way communication among health workers like sharing documents, video, audio and educational messages, and questions and answers                                | Service delivery, Human resources for health                 |
| MFR Federal Ministry of Health, dha@moh.gov.et                                               | Ethiopia | 01/01/2017 | Collects national health facility list, location, services, infrastructure and number of health professionals.                                                                 | Service delivery                                             |
| MEMS (Medical equipment management system) Federal Ministry of Health, dha@moh.gov.et        | Ethiopia | 01/03/2018 | The objective of the system is to automate medical equipment management system of the country from procurement up to disposal.                                                 | Service delivery                                             |
| Members system Federal Ministry of Health, dha@moh.gov.et                                    | Ethiopia | 01/12/2017 | Detail information about insurance members                                                                                                                                     | Healthcare Financing                                         |
| Medicine Registration System Federal Ministry of Health, dha@moh.gov.et                      | Ethiopia | 01/07/2017 | Medicine registration, suspension and cancellation processes                                                                                                                   | Service delivery                                             |
| KPI Survey Database Federal Ministry of Health, dha@moh.gov.et                               | Ethiopia | 01/07/2012 | The application is a data analysis tool that is used to measure staff and patient satisfaction.                                                                                | Service delivery                                             |
| IVR (Interactive voice response) Federal Ministry of Health, dha@moh.gov.et                  | Ethiopia | 01/07/2014 | To collect MNCH, PHEM, IRD, Stockout & death data from health post by health extension worker                                                                                  | Service delivery, Access to medicine, vaccine and Technology |
| Intellicare Federal Ministry of Health, dha@moh.gov.et                                       | Ethiopia | 01/05/2016 | To capture the patient interaction in the facility, human resource and financial transactions                                                                                  | Service delivery                                             |

|                                                                                                          |          |            |                                                                                                                                                                                                                             |                                                                |
|----------------------------------------------------------------------------------------------------------|----------|------------|-----------------------------------------------------------------------------------------------------------------------------------------------------------------------------------------------------------------------------|----------------------------------------------------------------|
| IFMIS - Integrated Financial Management Information System Federal Ministry of Health, dha@moh.gov.et    | Ethiopia | 01/09/2011 | Used to manage the budgeting and expenditure of the ministries finance                                                                                                                                                      | Healthcare Financing                                           |
| IBEX (Integrated Budget Expenditure System IBEX) Federal Ministry of Health, dha@moh.gov.et              | Ethiopia | 01/07/2018 | Financial record and reports                                                                                                                                                                                                | Healthcare Financing                                           |
| HRIS Licensing Federal Ministry of Health, dha@moh.gov.et                                                | Ethiopia | 01/10/2011 | HRIS-License is a tool to collect, store and manage health professionals licenses.                                                                                                                                          | Human resources for health                                     |
| HMIS Brisk Federal Ministry of Health, dha@moh.gov.et                                                    | Ethiopia | 01/07/2015 | Patient registration, patient data collection, triage patient and department assignment, clinical data collection, specimens collection, payment and billing transaction and patient management, in short serve as full EMR | Service delivery, Health information system                    |
| Gx alert Federal Ministry of Health, dha@moh.gov.et                                                      | Ethiopia | 01/10/2017 | To do tasks related with viral load laboratory                                                                                                                                                                              | Service delivery                                               |
| Green Stone Digital library Federal Ministry of Health, dha@moh.gov.et                                   | Ethiopia | 01/01/2017 | Enables to read and download different medical health electronic books subscribe journals                                                                                                                                   | Service delivery, Human resources for health                   |
| Fleet management system Federal Ministry of Health, dha@moh.gov.et                                       | Ethiopia | 01/12/2016 | To gather, store, process, monitor and report the movement of vehicles owned by the ministry                                                                                                                                | Service delivery                                               |
| EPS pharmaceutical information systems ( ARSMBDHS) Federal Ministry of Health, dha@moh.gov.et            | Ethiopia | 01/06/2017 | Drug, medical equipment and laboratory reagents stock management system.                                                                                                                                                    | Access to medicines, vaccines and technology, Service delivery |
| eMRIS (Electronic Multi Sectoral Response Information System) Federal Ministry of Health, dha@moh.gov.et | Ethiopia | 01/08/2016 | Data and reporting for HIV related data                                                                                                                                                                                     | Health information system                                      |
| EMR - ART Module Federal Ministry of Health, dha@moh.gov.et                                              | Ethiopia | 01/07/2018 | For ART data registry and analysis.                                                                                                                                                                                         | Service delivery                                               |
| eHMIS - Regions except SNNP Region Federal Ministry of Health, dha@moh.gov.et                            | Ethiopia | 01/06/2012 | For entry, analysis and reporting routine health data.                                                                                                                                                                      | Health information system                                      |
| EGBLS Federal Ministry of Health, dha@moh.gov.et                                                         | Ethiopia | 01/07/2015 | Equipment or property management                                                                                                                                                                                            | Service delivery                                               |



|                                                                                                             |          |            |                                                                                                                                                                                                                                                                                                                                                                                                                                                        |                                                              |
|-------------------------------------------------------------------------------------------------------------|----------|------------|--------------------------------------------------------------------------------------------------------------------------------------------------------------------------------------------------------------------------------------------------------------------------------------------------------------------------------------------------------------------------------------------------------------------------------------------------------|--------------------------------------------------------------|
| ECHMIS (Electronic Communication HMIS)<br>Federal Ministry of Health, dha@moh.gov.et                        | Ethiopia | 01/05/2017 | Used to register inventory and maintain bin cards and stoke cards                                                                                                                                                                                                                                                                                                                                                                                      | Service delivery, Access to medicine, vaccine and technology |
| eCHIS - Old Federal Ministry of Health,<br>dha@moh.gov.et                                                   | Ethiopia | 01/01/2015 | Rural community health information registration systems                                                                                                                                                                                                                                                                                                                                                                                                | Health information system,                                   |
| eCHIS - New Federal Ministry of Health,<br>dha@moh.gov.et                                                   | Ethiopia | 01/07/2018 | eCHIS is designed to facilitate the daily activities of the health extension worker. It serves as a job aid, point of service data collection, patient identification, and communication tool at the community and health post level.                                                                                                                                                                                                                  | Service delivery, Health information system                  |
| E&RIS (Emergency and referral information system) Federal Ministry of Health,<br>dha@moh.gov.et             | Ethiopia | 01/06/2016 | Service provided in facilities (government), referral networking and bed management                                                                                                                                                                                                                                                                                                                                                                    | Service delivery                                             |
| DSS (demographic surveillance system)<br>Federal Ministry of Health, dha@moh.gov.et                         | Ethiopia | 01/03/2010 | To support universities in generating longitudinal data on major demographic events and identify cause of death.                                                                                                                                                                                                                                                                                                                                       | Health information system                                    |
| DSS - Self Assesment Tool Federal Ministry of Health, dha@moh.gov.et                                        | Ethiopia | 01/04/2013 | Collect data for self-assessment                                                                                                                                                                                                                                                                                                                                                                                                                       | Human resources for health                                   |
| DHMS (Digital Hospital Management System) Federal Ministry of Health,<br>dha@moh.gov.et                     | Ethiopia | 01/05/2016 | Hospital activities card, lab, bed management, pharmacy, etc. it's like full EMR                                                                                                                                                                                                                                                                                                                                                                       | Service delivery, Health information system                  |
| District Health information system (DHIS2)<br>Federal Ministry of Health, dha@moh.gov.et                    | Ethiopia | 01/05/2016 | DHIS2 is a tool for collection, validation, analysis, presentation of aggregate and patient-based statistical data, tailored (but not limited) to integrated health information management activities. DHIS2 provides functions such as data entry tools, provides different kinds of validation tools, easy to use - one click reports, flexible and dynamic data analysis, easy to use metadata management, messaging interfaces for communications. | Health information system                                    |
| DATIM (Data for Accountability Transparency & Impact Monitoring) Federal Ministry of Health, dha@moh.gov.et | Ethiopia | 01/06/2015 | Used to report HMIS data from ART Sites that are supported by CDC                                                                                                                                                                                                                                                                                                                                                                                      | Health information system                                    |

|                                                                                                 |          |            |                                                                                                                                                                                                                              |                                                              |
|-------------------------------------------------------------------------------------------------|----------|------------|------------------------------------------------------------------------------------------------------------------------------------------------------------------------------------------------------------------------------|--------------------------------------------------------------|
| Dagu Federal Ministry of Health, dha@moh.gov.et                                                 | Ethiopia | 01/01/2010 | It is a Health Commodity Management Information System used to record new drugs (stock), calculate consumption rate, issue drugs to Units (departments) and manages inventory.                                               | Access to medicine, vaccine and technology, Service delivery |
| Cnet Federal Ministry of Health, dha@moh.gov.et                                                 | Ethiopia | 01/08/2012 | Finance & store Management.                                                                                                                                                                                                  | Service delivery                                             |
| CMMS (Computerized Maintenance Management System) Federal Ministry of Health, dha@moh.gov.et    | Ethiopia | 01/12/2017 | It is an electronic maintenance support system for medical equipment & office electronic equipment. The system registers all available medical equipment & manages inventory.                                                | Service delivery                                             |
| CCEIT Federal Ministry of Health, dha@moh.gov.et                                                | Ethiopia | 01/07/2017 | Cold chain equipment inventory                                                                                                                                                                                               | Service delivery, Access to medicine, vaccine and technology |
| CBHI (community based health insurance system ) Federal Ministry of Health, dha@moh.gov.et      | Ethiopia | 01/03/2016 | Manage hospital's patient health care financing system & reporting to respective woredas that are included in the cbhi scheme.                                                                                               | Service delivery, Healthcare finance                         |
| APTS (auditable pharmaceuticals transactions system) Federal Ministry of Health, dha@moh.gov.et | Ethiopia | 01/08/2016 | Facilitating pharmacy payment, stock management, staff performance                                                                                                                                                           | Service delivery                                             |
| Antroplus Federal Ministry of Health, dha@moh.gov.et                                            | Ethiopia | 01/07/2018 | RNA, different nutrition analysis                                                                                                                                                                                            | Service delivery                                             |
| AGHMC EMR Federal Ministry of Health, dha@moh.gov.et                                            | Ethiopia | 01/07/2018 | It is an electronic Medical Records System (EMR) that records individual patients information from card (registration) to assigning to physicians for treatment and records and retrieves patients information where needed. | Service delivery, Health information system                  |
| ADR (report online) Federal Ministry of Health, dha@moh.gov.et                                  | Ethiopia | 01/07/2015 | Used to report adverse drug event                                                                                                                                                                                            | Service delivery                                             |
| Admission Referral Service Federal Ministry of Health, dha@moh.gov.et                           | Ethiopia | 01/01/2017 | admission, discharge, referral service in & out, elective surgery appointment, normal outpatient appointment                                                                                                                 | Service delivery                                             |

|                                                                                |          |            |                                                                                                                                                                                                                                                                                                                                                                                                                                                                                                                                                                                                                                                                                                                                                                                                                                                                                                                                                                                      |                           |
|--------------------------------------------------------------------------------|----------|------------|--------------------------------------------------------------------------------------------------------------------------------------------------------------------------------------------------------------------------------------------------------------------------------------------------------------------------------------------------------------------------------------------------------------------------------------------------------------------------------------------------------------------------------------------------------------------------------------------------------------------------------------------------------------------------------------------------------------------------------------------------------------------------------------------------------------------------------------------------------------------------------------------------------------------------------------------------------------------------------------|---------------------------|
| Ethiopia Health Data Analytics Platform (EHDAP) Dawit Kassa, dawit@zenysis.com | Ethiopia | 01/01/2016 | <p>The Zenysis software integrates data from fragmented systems through an interoperability layer that uses data science techniques to harmonize the differences between integrated systems without requiring any modification to the systems themselves.</p> <p>In Ethiopia, the Zenysis platform successfully integrated data from more than 15 fragmented systems for the first time. This includes data from three routine Health information systems as well as surveillance data, surveys, supply chain data, financial data, climatological data and more.</p> <p>More than 600 million data points from these systems are now accessible for analysis through a single, easy-to-use platform. The platform has enabled a significant shift from low-resolution (regional-level) analytics to high-resolution (facility-level) analysis and decision-making. Decision-makers can now access continuously updated performance statistics for all 860+ districts on-demand.</p> | Health information system |
| DHIS2 for COVID-19 Surveillance: Ethiopia Rebecca Potter, covid@dhis2.org      | Ethiopia | 08/05/2020 | The DHIS2 digital data package for COVID-19 is designed to accelerate case detection, situation reporting, active surveillance and response in countries. The COVID-19 digital data package includes standard metadata aligned with the WHO's technical guidance on COVID-19 surveillance and has been adapted to local country context and language in this implementation.                                                                                                                                                                                                                                                                                                                                                                                                                                                                                                                                                                                                         | Health information system |

|                                                                                                                                                           |                 |                   |                                                                                                                                                                                                                                                                                                                                                                                                                                                                                                                                                                                                                                                                                                                                                                                                                                                                                                                                                                                                                 |                                                    |
|-----------------------------------------------------------------------------------------------------------------------------------------------------------|-----------------|-------------------|-----------------------------------------------------------------------------------------------------------------------------------------------------------------------------------------------------------------------------------------------------------------------------------------------------------------------------------------------------------------------------------------------------------------------------------------------------------------------------------------------------------------------------------------------------------------------------------------------------------------------------------------------------------------------------------------------------------------------------------------------------------------------------------------------------------------------------------------------------------------------------------------------------------------------------------------------------------------------------------------------------------------|----------------------------------------------------|
| <p>Life-saving Mobile Health Kits (LMHK) for Obstetric Care in Remote Areas Belay Haffa, <a href="mailto:belay_haffa@wvi.org">belay_haffa@wvi.org</a></p> | <p>Ethiopia</p> | <p>01/07/2019</p> | <p>Supported by a grant from Born on Time, a public-private partnership that is implementing several interventions to support the prevention of preterm birth, World Vision Ethiopia engaged with technology partner SLK TECHLABS to deploy mobile health screening kits with an internet-driven telemedicine capability in the Amhara region. These mobile health kits include a mobile phone app and diagnostic equipment, including ultrasound, that captures key vitals and assesses pregnant women for risk factors of preterm birth and other obstetric complications. The kits are used by trained outreach health care providers who are also linked with enhanced telemedicine at referral hospitals. This enables timely management of any areas of concern and encourages families to seek skilled attendants for potential preterm births. The kits can also be moved easily from village to village, which maximizes access to these essential services for more women living in remote areas.</p> | <p>Service delivery, Health information system</p> |
|-----------------------------------------------------------------------------------------------------------------------------------------------------------|-----------------|-------------------|-----------------------------------------------------------------------------------------------------------------------------------------------------------------------------------------------------------------------------------------------------------------------------------------------------------------------------------------------------------------------------------------------------------------------------------------------------------------------------------------------------------------------------------------------------------------------------------------------------------------------------------------------------------------------------------------------------------------------------------------------------------------------------------------------------------------------------------------------------------------------------------------------------------------------------------------------------------------------------------------------------------------|----------------------------------------------------|

|                                                                                                                                                                   |              |                   |                                                                                                                                                                                                                                                                                                                                                                                                                                                                                                                                                                                                                                                                                                                                                                                                                                                                                                   |                         |
|-------------------------------------------------------------------------------------------------------------------------------------------------------------------|--------------|-------------------|---------------------------------------------------------------------------------------------------------------------------------------------------------------------------------------------------------------------------------------------------------------------------------------------------------------------------------------------------------------------------------------------------------------------------------------------------------------------------------------------------------------------------------------------------------------------------------------------------------------------------------------------------------------------------------------------------------------------------------------------------------------------------------------------------------------------------------------------------------------------------------------------------|-------------------------|
| <p>Implementation of a LIMS based on GNU Health at the International Center for Medical Research of Franceville Armand Mpassy-Nzoumba, armandmpassy@yahoo.com</p> | <p>Gabon</p> | <p>01/10/2015</p> | <p>The system was implemented at the Medical Laboratory department. The purpose was to improve the overall efficiency of the department by: streamlining lab and billing processes, providing accuracy and timely delivery of lab services, improving management of patient data, improving revenues, reducing costs, improving reporting and statistics. It is operated by about 10 users. The following functions are fully integrated: Patient Management, Laboratory sample and test management, Reporting and statistics, Patient Billing and Financial Accounting, Health Insurance management, Patient Appointment management, Data exchange with the general accounting system of the whole organization. The system has been installed using the following platforms and technologies: OpenSuse Linux (server), Microsoft Windows 7/10 (clients), PostgreSQL (database), Tryton-ERP.</p> | <p>Service delivery</p> |
| <p>Suivi des malades diabétiques Mr Dupont, dupont58@gmail.com</p>                                                                                                | <p>Gabon</p> | <p>01/07/2019</p> | <p>Ce projet utilise les téléphones mobiles pour suivre et informer les malades diabétiques rattachés à un centre de santé</p>                                                                                                                                                                                                                                                                                                                                                                                                                                                                                                                                                                                                                                                                                                                                                                    | <p>Service delivery</p> |

|                                                                                                                                               |               |                   |                                                                                                                                                                                                                                                                                                                                                                                                                                                                                                                                                                                                                                                                                                                                                                                                               |                                                     |
|-----------------------------------------------------------------------------------------------------------------------------------------------|---------------|-------------------|---------------------------------------------------------------------------------------------------------------------------------------------------------------------------------------------------------------------------------------------------------------------------------------------------------------------------------------------------------------------------------------------------------------------------------------------------------------------------------------------------------------------------------------------------------------------------------------------------------------------------------------------------------------------------------------------------------------------------------------------------------------------------------------------------------------|-----------------------------------------------------|
| <p>Real-time COVID-19 case monitoring for the MoH Gambia Aleksa Krolls, aleksa@openfn.org</p>                                                 | <p>Gambia</p> | <p>03/04/2020</p> | <p>Open Function is currently configuring a CommCare-to-DHIS2 integration on the OpenFn platform to enable real-time monitoring and analysis of COVID-19 cases for The Gambian Ministry of Health. The MoH Gambia is implementing Dimagi's template CommCare COVID-19 applications. Using OpenFn, CommCare data will be automatically cleaned and uploaded to DHIS2 for visualization and monitoring of COVID-19 cases nationwide. OpenFn is used by dozens of global health organizations worldwide, and has been used to facilitate disease monitoring and analysis at scale across the world. The OpenFn provides a secure and scalable infrastructure on which organizations can connect any technology and automate key workflows, including data cleaning, data validation, and duplicate-checking.</p> | <p>Health information system</p>                    |
| <p>Hello Nurse Darlene Irby, Darlene.Irby@jhpiego.org</p>                                                                                     | <p>Ghana</p>  | <p>01/01/2017</p> | <p>Hello Nurse is a two chapter interactive story covering malaria prevention, diagnosis and case management for pre-service nurses. The MCSP Malaria Interactive Story App ('Hello Nurse') is part of a series of e-learning tools being used by USAID's flagship Maternal and Child Survival Program (MCSP) to strengthen malaria health services, focused on the components around strengthening and building the capacity of pre-service institutions.</p>                                                                                                                                                                                                                                                                                                                                                | <p>Service delivery, Human resources for health</p> |
| <p>Blood Safety Strengthening Programme: Blood Safety Information System (BSIS) Implementation Rhonwyn Cornell, rhonwyn.cornell@jembi.org</p> | <p>Ghana</p>  | <p>03/10/2016</p> | <p>Safe blood is used to treat postpartum hemorrhage, childhood malaria, severe anemia, trauma and surgery. The BSSP develops and implements BSIS, an open source system designed to manage donor and donation information from the point of donation to transfusion. BSIS is for resource-limited blood services and supports AfSBT accreditation processes. Our implementations follows international good practice, building local</p>                                                                                                                                                                                                                                                                                                                                                                     | <p>Service delivery</p>                             |

|                                                                                                                                                      |       |            |                                                                                                                                                                                                                                                                                                                                                                                                                                                                                                                                                                                                                                    |                                              |
|------------------------------------------------------------------------------------------------------------------------------------------------------|-------|------------|------------------------------------------------------------------------------------------------------------------------------------------------------------------------------------------------------------------------------------------------------------------------------------------------------------------------------------------------------------------------------------------------------------------------------------------------------------------------------------------------------------------------------------------------------------------------------------------------------------------------------------|----------------------------------------------|
|                                                                                                                                                      |       |            | capacity within the blood services to use, manage and maintain BSIS.                                                                                                                                                                                                                                                                                                                                                                                                                                                                                                                                                               |                                              |
| The Safe Delivery App in Ghana Lauren Bellhouse, lauren@maternity.dk                                                                                 | Ghana | 01/12/2017 | The Safe Delivery App (SDA) for Ghana was formally launched in December 2017 in partnership with the Danish Embassy in Ghana and UNFPA Ghana, with the support of the Ghana Health Service and the Ministry of Health. Prior to the launch, partners worked to adapt the SDA to Ghanaian national standards and protocols. Targeted training enabling skilled birth attendants to use the SDA as an on-the-job aid for handling normal and complicated births is ongoing. The App has been integrated into trainings carried out by UNFPA, Ghana Health Service, CHAG, NORSAAC, and most recently a virtually training by the MOH. | Service delivery, Human resources for health |
| MNCH mobile content with nutrition focus, available in Twi, Ewe, Hausa and English in SMS and voice transcript format Kim Viljoen, kviljoen@gsma.com | Ghana | 01/09/2013 | Nutrition and MNCH mobile ready content for Ghana available in English, Twi, Ewe and Hausa. All content was produced by in-country specialists and is based on recommended MNCH and local nutrition practices. The Ministry of Health played a vital role in the development and content validation. The Content is available in the form of: topic-specific factsheets, SMSs and voice message transcripts.                                                                                                                                                                                                                       | Service delivery                             |
| DHIS2 for COVID-19 Surveillance: Gambia Rebecca Potter, covid@dhis2.org                                                                              | Ghana | 08/05/2020 | The DHIS2 digital data package for COVID-19 is designed to accelerate case detection, situation reporting, active surveillance and response in countries. The COVID-19 digital data package includes standard metadata aligned with the WHO's technical guidance on COVID-19 surveillance and has been adapted to local country context and language in this implementation.                                                                                                                                                                                                                                                       | Health information system                    |

|                                                                       |              |                   |                                                                                                                                                                                                                                                                                                                                                                                                                                                                                                                                                                                                                                                                                                                                                                                                                                                                                                                                                                                                                  |                                                    |
|-----------------------------------------------------------------------|--------------|-------------------|------------------------------------------------------------------------------------------------------------------------------------------------------------------------------------------------------------------------------------------------------------------------------------------------------------------------------------------------------------------------------------------------------------------------------------------------------------------------------------------------------------------------------------------------------------------------------------------------------------------------------------------------------------------------------------------------------------------------------------------------------------------------------------------------------------------------------------------------------------------------------------------------------------------------------------------------------------------------------------------------------------------|----------------------------------------------------|
| <p>LBG Covid-19 Response Tang Simon,<br/>simon@literacybridge.org</p> | <p>Ghana</p> | <p>09/07/2020</p> | <p>With financial support from Amplio Network-USA, LBG partnered Ghana Health Service in April 2020 to launch the COVID-19 awareness campaign in eight (8) vulnerable districts in the Upper West region. In this region, there is an increased risk of the virus due to cross-border activities with Burkina Faso, as well as from migration within the country. Most big organizations shut down in March 2020 following the outbreak of the disease in Ghana. Consequently, our COVID-19 response is the main intervention reaching vulnerable communities. We are leveraging our relationships with key stakeholders, including district health directors, district assembly members, traditional authorities, religious leaders, and others to coordinate. Under this response project, LBG has conducted training and deployed Talking Books with COVID-19 content in four local languages across 207 Community-based Health Planning and Services zones/compounds and 78 community health volunteers.</p> | <p>Service delivery</p>                            |
| <p>MEDTRACK Omar Seidu Farouk,<br/>omar@medtrack.com.gh</p>           | <p>Ghana</p> | <p>06/06/2017</p> | <p>MedTrack is an electronic health records platform that connects physicians to community pharmacies and diagnostics centres. The system integrates medical records into national digital identification numbers of citizens, making them portable and universally accessible by authorized providers. We are Africa's first EHR management platform. Our mission is to bring electronic health records to 1 billion Africans using their national digital identities. MedTrack's health records management eliminates fragmentation across different health facilities and serves as the building blocks for emerging healthcare innovations in telemedicine, Healthtech AI and Population Health Management tools.</p>                                                                                                                                                                                                                                                                                        | <p>Service delivery, Health information system</p> |



|                                                                                      |              |                   |                                                                                                                                                                                                                                                                                                                                                                                                                                                                                                                                                                                                                                                                                                                                                                                                                                                                          |                         |
|--------------------------------------------------------------------------------------|--------------|-------------------|--------------------------------------------------------------------------------------------------------------------------------------------------------------------------------------------------------------------------------------------------------------------------------------------------------------------------------------------------------------------------------------------------------------------------------------------------------------------------------------------------------------------------------------------------------------------------------------------------------------------------------------------------------------------------------------------------------------------------------------------------------------------------------------------------------------------------------------------------------------------------|-------------------------|
| <p>Carely Digital Health Platform Kelvin Ashie,<br/>healthdirectglobal@gmail.com</p> | <p>Ghana</p> | <p>04/05/2020</p> | <p>Our Technology Solution - Health Direct Global provides a multi-sided platform that allows patients and doctors to track medical records efficiently, schedule and manage appointments and have access to alternative healthcare financing for their healthcare needs through a diverse range of healthcare plans. Our multi-sided platform allows users to have on-demand access to healthcare through a network of health service providers and also a financially inclusive platform that allows users to save and spend towards their healthcare needs. Health Direct positions itself as a data-driven health-tech company that focuses on building the data engine and payment rails that will power the health industry in Africa for impact, and scale and provide a pathway for reverse innovation for shared value creation in the healthcare industry.</p> | <p>Service delivery</p> |
|--------------------------------------------------------------------------------------|--------------|-------------------|--------------------------------------------------------------------------------------------------------------------------------------------------------------------------------------------------------------------------------------------------------------------------------------------------------------------------------------------------------------------------------------------------------------------------------------------------------------------------------------------------------------------------------------------------------------------------------------------------------------------------------------------------------------------------------------------------------------------------------------------------------------------------------------------------------------------------------------------------------------------------|-------------------------|

|                                                                                           |        |            |                                                                                                                                                                                                                                                                                                                                                                                                                                                                                                                                                                                                                                                                                                                                                                                                                                                                                                                                                                                                                                                                                 |                           |
|-------------------------------------------------------------------------------------------|--------|------------|---------------------------------------------------------------------------------------------------------------------------------------------------------------------------------------------------------------------------------------------------------------------------------------------------------------------------------------------------------------------------------------------------------------------------------------------------------------------------------------------------------------------------------------------------------------------------------------------------------------------------------------------------------------------------------------------------------------------------------------------------------------------------------------------------------------------------------------------------------------------------------------------------------------------------------------------------------------------------------------------------------------------------------------------------------------------------------|---------------------------|
| Global Health Security Agenda Pia MacDonald, pmacdonald@rti.org                           | Guinea | 01/02/2015 | Through the U.S. Centers for Disease Control and Prevention-funded Global Health Security Agenda (GHSA) project in Guinea (2015–2019), RTI International provides technical assistance to the Ministry of Health and Hygiene (MOH) to strengthen the disease surveillance system to better prevent, detect, and respond to outbreaks. RTI is providing assistance to the MOH to implement DHIS 2 for epidemiological disease surveillance nationwide including aggregate weekly reporting and case notifications.                                                                                                                                                                                                                                                                                                                                                                                                                                                                                                                                                               | Health information system |
| Suivi de la vaccination de routine des enfants de moins 5 ans Dr Souma, souma58@gmail.com | Guinea | 27/07/2019 | ce projet utilise le mobile pour suivre les enfants à vacciner en envoyer des messages de RV et de rappels aux mamans                                                                                                                                                                                                                                                                                                                                                                                                                                                                                                                                                                                                                                                                                                                                                                                                                                                                                                                                                           | Service delivery          |
| Global Open Facility Registry (GOFR) Eileen Reynolds, ereynolds@rti.org                   | Guinea | 01/07/2018 | <p>RTI International and JSI implemented the Global Open Facility Registry (GOFR) project in Guinea. GOFR’s objective is to enable integrated and interoperable Master Facility Registries (MFR) by:</p> <ul style="list-style-type: none"> <li>• Developing software facility reconciliation tools that strengthen interoperable MFRs.</li> <li>• Supporting Ministries of Health in MFR practices.</li> </ul> <p>Our accomplishments were:</p> <ul style="list-style-type: none"> <li>• Contribution to the requirements for Guinea for the facility reconciliation tool and testing of the tool.</li> <li>• Development of a facility registry management manual.</li> <li>• Development of a DHIS2 account request form and process to strengthen management of user accounts on the national Health information system.</li> <li>• Production of a report which analyzed data collected on health facilities using the national DHIS2.</li> <li>• Training of the MoH ICT and SNIS teams on how to use the GOFR reconciliation tool to enhance interoperability</li> </ul> | Health information system |

|                                                                                            |        |            |                                                                                                                                                                                                                                                                                                                                                                                                                                                                                                                                                                                                                                                                                                                                                                                                  |                                                              |
|--------------------------------------------------------------------------------------------|--------|------------|--------------------------------------------------------------------------------------------------------------------------------------------------------------------------------------------------------------------------------------------------------------------------------------------------------------------------------------------------------------------------------------------------------------------------------------------------------------------------------------------------------------------------------------------------------------------------------------------------------------------------------------------------------------------------------------------------------------------------------------------------------------------------------------------------|--------------------------------------------------------------|
|                                                                                            |        |            | <ul style="list-style-type: none"> <li>Strengthening of DHIS 2 as the current repository of the facility registry by adding sub-districts to the organizational hierarchy.</li> </ul>                                                                                                                                                                                                                                                                                                                                                                                                                                                                                                                                                                                                            |                                                              |
| OpenLMIS Guinea Rebecca Alban, info@openlmis.org                                           | Guinea | 01/08/2018 | The GHSC-PSM project provided the assistance needed to implement a new e-LMIS, including the development of a roll-out plan for the automation process detailing roles, responsibilities, and commitments of each stakeholder. The roll-out team entered all LMIS data, developed training materials, created a pool of trainers, and organized training workshops in regions. Meanwhile, the Guinea MoH set up a governance body for the OpenLMIS, including a steering committee and a multidisciplinary technical team with representatives of DNPM, Bureau de Stratégie et de Développement (BSD), the Information and Communication Technology (ICT) unit and Pharmacie Centrale de Guinee (PCG), USAID, GHSC-PSM, Catholic Relief Services (CRS), and the World Health Organization (WHO). | Access to medicine, vaccine and technology, Service delivery |
| Guinea EVD contact Tracing Anne Lui, Aboubacar DIALLO, Mamady Camara, adiallo84x@gmail.com | Guinea | 15/10/2014 | An informatics system consisting of a mobile health application and business intelligence software was used for collecting and analyzing Ebola contact tracing data. This system offered potential to improve data access and quality to support evidence-based decision making for the Ebola response in Guinea. Implementation challenges included software limitations, technical literacy of users, coordination among partners, government capacity for data utilization, and data privacy concerns.                                                                                                                                                                                                                                                                                        | Health information system                                    |
| DHIS2 for COVID-19 Surveillance: Guinea Rebecca Potter, covid@dhis2.org                    | Guinea | 08/05/2020 | The DHIS2 digital data package for COVID-19 is designed to accelerate case detection, situation reporting, active surveillance, and response in countries. The COVID-19 digital data package includes standard metadata aligned with the WHO's technical guidance on COVID-19 surveillance and has been adapted to local                                                                                                                                                                                                                                                                                                                                                                                                                                                                         | Health information system                                    |

|                                                                                         |               |            |                                                                                                                                                                                                                                                                                                                                                                                                                                                                                                                 |                                                              |
|-----------------------------------------------------------------------------------------|---------------|------------|-----------------------------------------------------------------------------------------------------------------------------------------------------------------------------------------------------------------------------------------------------------------------------------------------------------------------------------------------------------------------------------------------------------------------------------------------------------------------------------------------------------------|--------------------------------------------------------------|
|                                                                                         |               |            | country context and language in this implementation.                                                                                                                                                                                                                                                                                                                                                                                                                                                            |                                                              |
| DHIS2 for COVID-19 Surveillance: Guinea Bissau<br>Rebecca Potter, covid@dhis2.org       | Guinea-Bissau | 08/05/2020 | The DHIS2 digital data package for COVID-19 is designed to accelerate case detection, situation reporting, active surveillance, and response in countries. The COVID-19 digital data package includes standard metadata aligned with the WHO's technical guidance on COVID-19 surveillance and has been adapted to local country context and language in this implementation.                                                                                                                                   | Health information system                                    |
| Hoji Mobile Data Collection and Analysis Platform<br>Gitahi Ng'ang'a, gitahi@hoji.co.ke | Kenya         | 01/03/2016 | Hoji is an easy to use mobile data collection and analysis platform for surveys, M&E and DQAs. It enables health professionals to easily develop and deploy digital data collection and analysis solutions at scale. Field workers collect and submit data to an online web server in real-time. They may also collect data while offline. The server then runs detailed real-time analysis, enabling managers to make evidence-based decisions, optimize interventions and maximize impact.                    | Health information system                                    |
| cStock/DHIS2<br>Zoya Mohammed, zoya_mohamed@insupplyhealth.com                          | Kenya         | 01/02/2017 | The purpose of this project is to scale up the cStock approach (first implemented in Malawi) in Kenya using DHIS2 as the technology platform. In Malawi cStock was successful and continues to be an integral part of the community health program however the technology is not easily transferable to new contexts. The pilot in Kenya will test the applicability of this approach in another context and develop a tool and supply chain model that can be used by community health supply chains globally. | Service delivery, Access to medicine, vaccine and Technology |
| personal women's health advice via mobile chat<br>MacGregor, Mac@lily.health            | Kenya         | 31/05/2017 | The technology aims to provide women: 1. Expert reproductive health advice 2. Easily accessible on all mobile phones 2.Private messaging format that is comfortable to use                                                                                                                                                                                                                                                                                                                                      | Service delivery                                             |

|                                                                                                                             |       |            |                                                                                                                                                                                                                                                                                                                                                                                                                                                                                                       |                      |
|-----------------------------------------------------------------------------------------------------------------------------|-------|------------|-------------------------------------------------------------------------------------------------------------------------------------------------------------------------------------------------------------------------------------------------------------------------------------------------------------------------------------------------------------------------------------------------------------------------------------------------------------------------------------------------------|----------------------|
| Scaling of BLIS(Basic Laboratory Information System) 3.0 Implementation Across Africa Emmanuel Kweyu, ekweyu@strathmore.edu | Kenya | 01/01/2014 | The (BLIS) project, is an open source mobile and Web-based system that can be installed in a local, district, or national laboratory. It standardizes data collection, track the specimen/test workflow and improve the ability to generate useful reports and can both give a realistic picture of laboratory services and assist with staff and budget planning. BLIS has incrementally improved based on the user feedback and now is moving to the new release of Ver. 3.0.                       | Service delivery     |
| Medic App in Siaya County in partnership with Ministry of Health Michael Korir, korir@medicmobile.org                       | Kenya | 03/08/2020 | In 2017, County Government of Siaya and Medic Mobile partnered to implement the CHT to support Siaya's Community Health Worker (CHW) program. Since then the program has grown to support more than 2,217 CHWs providing integrated care for pregnant women and children including immunization, Integrated Community Case Management (iCCM) and malnutrition support, family planning, eye care, community based disease surveillance and HIV testing and referrals.                                 | Service delivery     |
| M-TIBA mobile health wallet Maarten Ras, m.ras@carepay.co.ke                                                                | Kenya | 01/09/2016 | M-TIBA is a digital health payment platform that directly connects patients, payers and healthcare providers and exchanges money and data between them. M-TIBA is built on Safaricom's revolutionary M-PESA mobile payment platform, with a front-end mobile health wallet that can empower everyone with a mobile phone to make informed decisions about their healthcare. The wallet facilitates savings, remittances, low-cost insurance and donations for the health of individuals and families. | Healthcare Financing |

|                                                                                     |       |            |                                                                                                                                                                                                                                                                                                                                                                                                                                                                                                            |                                             |
|-------------------------------------------------------------------------------------|-------|------------|------------------------------------------------------------------------------------------------------------------------------------------------------------------------------------------------------------------------------------------------------------------------------------------------------------------------------------------------------------------------------------------------------------------------------------------------------------------------------------------------------------|---------------------------------------------|
| Connected Diagnostics for malaria Tobias Rinke de Wit, t.rinkedewit@pharmaccess.org | Kenya | 01/10/2017 | Connected Diagnostics (ConnDx) is an innovative, cost-efficient way to revolutionize the diagnosis and financing of malaria treatment. If treatment is targeted only at patients who have tested positive, resources can be spent more effectively to save lives and unnecessary prescriptions avoided. Capitalizing on the mobile revolution, ConnDx makes payments for treatment conditional on positive tests, using low-cost diagnostics, cloud-based technology, and the M-TIBA mobile health wallet. | Healthcare Financing                        |
| Digital Cash Advance for the health sector Tom Bouma, t.bouma@medicalcreditfund.org | Kenya | 01/01/2017 | Medical Credit Fund's Digital Cash Advance is expanding mobile lending into the Kenyan health sector. The Digital Cash Advance is a short-term loan facility that uses the digital revenues of health SMEs to secure and repay uncollateralized loans. In a sector where it can be difficult to secure a regular bank loan, it provides a fast digital financing solution. As of December 2018, over 900 loans totaling \$2.6 million have been disbursed to 200 borrowers, with a 97% repayment rate.     | Healthcare financing                        |
| Regional Action Through Data (RAD) Laurie Markle, LMarkle@brhc.com                  | Kenya | 26/09/2018 | Ensure continuity of care in immunization for children within the population along the selected cross-border areas, utilizing an electronic Health information system based on individual data. Main users are clients (children accompanied by mother/fathers and guardians) and providers. the solution is currently being implemented along the borders of Uganda and Kenya, with another pair of countries to be selected for the next phase by the IGAD Member Countries.                             | Service delivery, Health information system |
| Malaria Test Tim Nichols, tim.nichols@vitalwave.com                                 | Kenya | 06/03/2019 | Testing the DSME space                                                                                                                                                                                                                                                                                                                                                                                                                                                                                     | Service delivery                            |

|                                                                                                                                                     |              |                   |                                                                                                                                                                                                                                                                                                                                                                                                                                                                                                                                                                                                                                                                                                                                                                                                                                                                                                                                                                                                                                                                           |                         |
|-----------------------------------------------------------------------------------------------------------------------------------------------------|--------------|-------------------|---------------------------------------------------------------------------------------------------------------------------------------------------------------------------------------------------------------------------------------------------------------------------------------------------------------------------------------------------------------------------------------------------------------------------------------------------------------------------------------------------------------------------------------------------------------------------------------------------------------------------------------------------------------------------------------------------------------------------------------------------------------------------------------------------------------------------------------------------------------------------------------------------------------------------------------------------------------------------------------------------------------------------------------------------------------------------|-------------------------|
| <p>SmartHealth App in Kenya Nii Amon Dsane, ndsane@livinggoods.org</p>                                                                              | <p>Kenya</p> | <p>01/09/2016</p> | <p>Living Goods and Medic Mobile have collaborated to create a powerful set of mobile and web tools to support the Community Health Workers (CHW's) assisted by Living Goods. Built on Community Health Toolkit Framework core, the open-source Smart Health app is used by CHWs to support delivery of high quality and integrated primary health care services, including common childhood diseases such as malaria, diarrhea and pneumonia; maternal and neonatal care, family planning and immunization referral services. Although Living Goods independently configured its immunization and COVID-19 workflows, it still actively collaborates with Medic Mobile for ongoing technical support, including needs assessments, technology strategy and upgrades. This application also has a supervisor dashboard that enables the real-time remote management of CHW's, also helps manage effective stocking of medical commodities, and is being used to provide the government with critical data to better plan and budget for community-level interventions</p> | <p>Service delivery</p> |
| <p>MNCH mobile content with nutrition focus, available in Swahili and English in SMS and voice transcript format Kim Viljoen, kviljoen@gsma.com</p> | <p>Kenya</p> | <p>01/09/2013</p> | <p>The GSMA, together with its global content consortium lead by CABI, developed open-source nutrition and MNCH mobile ready content for Kenya available in Swahili and English. All content was produced by in-country specialists and is based on recommended MNCH and local nutrition practices. The Ministry of Health played a vital role in the development and content validation. The Content is available in the form of: topic-specific factsheets, SMSs and voice message transcripts.</p>                                                                                                                                                                                                                                                                                                                                                                                                                                                                                                                                                                     | <p>Service delivery</p> |

|                                                                                                                                                                  |              |                   |                                                                                                                                                                                                                                                                                                                                                                                                                                                                                                                                                                                                                                                                                                                                                                                                                                                                                                                                                                                   |                         |
|------------------------------------------------------------------------------------------------------------------------------------------------------------------|--------------|-------------------|-----------------------------------------------------------------------------------------------------------------------------------------------------------------------------------------------------------------------------------------------------------------------------------------------------------------------------------------------------------------------------------------------------------------------------------------------------------------------------------------------------------------------------------------------------------------------------------------------------------------------------------------------------------------------------------------------------------------------------------------------------------------------------------------------------------------------------------------------------------------------------------------------------------------------------------------------------------------------------------|-------------------------|
| <p>Keheala - Digital adherence technology that uses behavioral 'nudges' and basic feature phones to improve health outcomes. Jon Rathouser, jonr@keheala.com</p> | <p>Kenya</p> | <p>01/04/2018</p> | <p>Keheala is a digital health platform that delivers behavioral interventions across basic feature phones and smartphones in order to improve healthcare access and treatment outcomes for patients in the developing world. Keheala addresses the non-medical drivers of disease - stigma, a lack of information, motivation and support - with demonstrated behavioral strategies from the social sciences (behavioral economics and psychology). In partnership with the U.S. Agency for International Development (USAID), the Kenyan Ministry of Health and academic partners at MIT, Keheala implemented a 1200 tuberculosis patient randomized controlled trial in Kenya. Patients using the Keheala intervention demonstrated a 68% reduction in the unsuccessful treatment outcomes - death, failed treatment and loss to follow up - compared to the standard of care control group. These results were recently published by the New England Journal of Medicine.</p> | <p>Service delivery</p> |
| <p>Medic App in Elgeyo Marakwet Susan Maigua, susan@medicmobile.org</p>                                                                                          | <p>Kenya</p> | <p>06/01/2017</p> | <p>The project seeks to improve access to critical health services and overall health for underserved, women, and children in Elgeyo Marakwet County through education, community training, and the provision of tools and other services to the Ministry of Health and staff. Leveraging mobile tools and other tools, we will increase ANC and immunization coverage, increase the Service delivery points (SDP) for basic emergency obstetric and newborn care (BeMONC) and family planning (FP) commodities, improve FP uptake, and strengthen health Service delivery on ANC, immunization, delivery, PNC, and service reporting.</p>                                                                                                                                                                                                                                                                                                                                        | <p>Service delivery</p> |



|                                                                                                                                                                            |              |                   |                                                                                                                                                                                                                                                                                                                                                                                                                                                                                                                                                                                                                                                                                                                                                                                                                                                                                                                      |                         |
|----------------------------------------------------------------------------------------------------------------------------------------------------------------------------|--------------|-------------------|----------------------------------------------------------------------------------------------------------------------------------------------------------------------------------------------------------------------------------------------------------------------------------------------------------------------------------------------------------------------------------------------------------------------------------------------------------------------------------------------------------------------------------------------------------------------------------------------------------------------------------------------------------------------------------------------------------------------------------------------------------------------------------------------------------------------------------------------------------------------------------------------------------------------|-------------------------|
| <p>Digital African Health Library Dr Bruce Dahlman, director@digitalhealthlibrary.net</p>                                                                                  | <p>Kenya</p> | <p>01/04/2016</p> | <p>It is a smartphone based digital library membership service that brings to clinicians the benefit of a one-stop clinical decision support application with 50+ evidence-based resources within a single search to answer the clinical care questions that are prompted by patients at the 'point of care'. The Digital African Health Library is powered by Indextra, the leading mobile library platform for both smartphone or tablet; on Android and Apple's iOS. Within each collaborating country, the Digital Library aims to include Ministry of Health guidelines and newsletters, local medical journals as well as the core handbooks from Oxford, Cambridge, Wiley and British National Forumulary Publishers.</p>                                                                                                                                                                                     | <p>Service delivery</p> |
| <p>Improving Healthcare Capacity and Access Using THINKMD's Clinical Decision Support Tool Used by Private Healthcare Providers Meg McLauhlin, mmclaughlin@thinkmd.org</p> | <p>Kenya</p> | <p>01/05/2019</p> | <p>THINKMD's platform will be implemented by private health care providers working at local pharmacy kiosks and private healthcare clinics within the Kibera slums of Nairobi, Kenya. In a one-year implementation, private healthcare providers will utilize THINKMD's platform to triage and treat patients. Pre/post analysis will be completed to better understand the impact of using THINKMD's platform and will consider: quality of care; healthcare capacity and skills; adherence to protocols; monitoring of drug administration; monitoring of medicine inventory; appropriate treatment; patient satisfaction; health seeking behavior; knowledge of danger signs; as well as other measures helping to identify both health and economic impact. Population health data will be captured throughout the implementation and be used to help monitor public health and the potential for outbreaks.</p> | <p>Service delivery</p> |

|                                                                                  |              |                   |                                                                                                                                                                                                                                                                                                                                                                                                                                                                                                                                                                                                                                                                                                                                                                                                                                                                                                                                                   |                         |
|----------------------------------------------------------------------------------|--------------|-------------------|---------------------------------------------------------------------------------------------------------------------------------------------------------------------------------------------------------------------------------------------------------------------------------------------------------------------------------------------------------------------------------------------------------------------------------------------------------------------------------------------------------------------------------------------------------------------------------------------------------------------------------------------------------------------------------------------------------------------------------------------------------------------------------------------------------------------------------------------------------------------------------------------------------------------------------------------------|-------------------------|
| <p>Safe Abortion App Sarah Shannon, Executive Director, SJHOLCOMBE@gmail.COM</p> | <p>Kenya</p> | <p>01/01/2018</p> | <p>This app provides comprehensive information on safe abortion that can be used alone or shared by women, healthcare workers and women's health advocates. Once downloaded, the app operates offline, without a data plan or internet access. By meeting women's needs for reliable, understandable and actionable information, this app can help prevent the harm caused by unsafe abortion and restrictions on women's access to reproductive health. The app provides a pregnancy calculator; a comparison of methods; explicit instructions and a description of what to expect; information on danger signs; and an extensive set of FAQ.</p>                                                                                                                                                                                                                                                                                               | <p>Service delivery</p> |
| <p>Empower Health Molly Guy, molly.guy@medtronic.com</p>                         | <p>Kenya</p> | <p>01/02/2018</p> | <p>The goal of Empower Health is to improve disease awareness, reduce the burden of disease, and improve the efficiency of managing hypertension and diabetes for both patients and clinicians. The Empower Health model consists of a mobile tablet, an automated blood pressure (BP) machine, a glucometer, and a novel proprietary software application—combined in a unique platform for efficient screening and longitudinal management of a patient cohort. Leveraging the model, physicians provide patients with a tailored hypertension and/or diabetes management plan. Patients can access regular BP and blood glucose checks at community-partner locations where they receive real-time feedback on their measurement. On the mobile application, clinicians can view patient data, provide direct patient feedback on their condition via SMS, and write electronic prescriptions—accessible through participating pharmacies.</p> | <p>Service delivery</p> |

|                                                                                                               |              |                   |                                                                                                                                                                                                                                                                                                                                                                                                                                                                                                                                                                                                                                                                                                                                                                                                                                                                                                                                                                                                          |                                                    |
|---------------------------------------------------------------------------------------------------------------|--------------|-------------------|----------------------------------------------------------------------------------------------------------------------------------------------------------------------------------------------------------------------------------------------------------------------------------------------------------------------------------------------------------------------------------------------------------------------------------------------------------------------------------------------------------------------------------------------------------------------------------------------------------------------------------------------------------------------------------------------------------------------------------------------------------------------------------------------------------------------------------------------------------------------------------------------------------------------------------------------------------------------------------------------------------|----------------------------------------------------|
| <p>M-Sawazisha: Integrating Mobile Technology in MNCH in Afya Jijini Michael Korir, korir@medicmobile.org</p> | <p>Kenya</p> | <p>12/03/2018</p> | <p>M-Sawazisha will help community health volunteers register new pregnancies, track ANC visits, flag danger signs, report on deliveries, report on post-partum visits, report on postpartum family planning and ask questions about pregnancy and family planning at the household level. The project will be implemented in the Nairobi slums (Mathare area) and a list of project facilities will be confirmed and provided by HealthRight International. Twenty-five CHVs will be selected from key catchment areas for each of the possible four health facilities in the project area. The 6-month project will train a total of 100 CHVs to offer services in these areas, and the general project will also use CHVs to deliver Nutrition and WASH messages at the community level.</p>                                                                                                                                                                                                          | <p>Health information system, Service delivery</p> |
| <p>PROMPTS - Promoting Mothers during Pregnancy through SMS Rachel M. Jones, Rjones@jacarandahealth.org</p>   | <p>Kenya</p> | <p>01/05/2018</p> | <p>PROMPTS is a text messaging platform that empowers mothers to seek care at the right time and place. PROMPTS is a free program that provides pregnant women and new mothers in public health systems with a carefully designed sequence of behavioral nudge messages , and an AI-supported helpdesk service that triages responses and questions to flag for clinical urgency.</p> <p>Key program results:</p> <ul style="list-style-type: none"> <li>• 150,000+ mothers have enrolled in platform in less than a year from over 250 public hospitals</li> <li>• 32,000+ questions have been answered within 24 hours.</li> <li>• Facilities with PROMPTS have a 20% increase in mothers completing 4 ANC visits compared to equivalent non-participating facilities.</li> <li>• A randomized controlled trial (RCT) conducted with 900 women seeking care at public facilities demonstrated when pregnant women or new mothers receive our SMS messages, they are 22% more likely to seek</li> </ul> | <p>Service delivery</p>                            |

|  |  |  |                                                                                                                       |  |
|--|--|--|-----------------------------------------------------------------------------------------------------------------------|--|
|  |  |  | advice for their negative health symptoms (p=0.07; 90% CI), and they are 1.6x more likely to take up family planning. |  |
|--|--|--|-----------------------------------------------------------------------------------------------------------------------|--|

|                                                                         |              |                   |                                                                                                                                                                                                                                                                                                                                                                                                                                                                                                                                                                                                                                                                                                                                                                                                                                                                                                                                                                                                                                               |                                                                     |
|-------------------------------------------------------------------------|--------------|-------------------|-----------------------------------------------------------------------------------------------------------------------------------------------------------------------------------------------------------------------------------------------------------------------------------------------------------------------------------------------------------------------------------------------------------------------------------------------------------------------------------------------------------------------------------------------------------------------------------------------------------------------------------------------------------------------------------------------------------------------------------------------------------------------------------------------------------------------------------------------------------------------------------------------------------------------------------------------------------------------------------------------------------------------------------------------|---------------------------------------------------------------------|
| <p>Medkit.Network Dr. Louis Somoni Machogu,<br/>dr.somoni@gmail.com</p> | <p>Kenya</p> | <p>26/04/2020</p> | <p>Aggregator of Pharmacy professionals and their pharmacies, linking them with patients, their clinicians and tracking availability &amp; quality assurance for Pharmaceutical services, Health Products and technologies. Vision is to have all pharmacies communicating on the free medkit.network HMIS/POS/ERP/Inventory Management infrastructure offering sustainability JIT on supply chain; and patient data portability to aid telemedicine &amp; epharmacy services. Currently servicing the needs of Kenyans under quarantine, Covid 19 stigma &amp; home based care with their e - prescription, needs as well delivering medicines to parents and loved ones to Kenyans living in diaspora as well as those in country. We have served clients paying cash, via insurance or even seeking medicines through public facilities. This ensures compliance to reduced movement and risk of contact with the coronavirus by both the patients living with a chronic ailment and the healthcare workers working in the pharmacies.</p> | <p>Service delivery, Access to medicine, vaccine and Technology</p> |
|-------------------------------------------------------------------------|--------------|-------------------|-----------------------------------------------------------------------------------------------------------------------------------------------------------------------------------------------------------------------------------------------------------------------------------------------------------------------------------------------------------------------------------------------------------------------------------------------------------------------------------------------------------------------------------------------------------------------------------------------------------------------------------------------------------------------------------------------------------------------------------------------------------------------------------------------------------------------------------------------------------------------------------------------------------------------------------------------------------------------------------------------------------------------------------------------|---------------------------------------------------------------------|

|                                                                                                  |              |                   |                                                                                                                                                                                                                                                                                                                                                                                                                                                                                                                                                                                                                                                                                                                                                                                                                                                                                                                                                                                                                                                                                                                              |                                                    |
|--------------------------------------------------------------------------------------------------|--------------|-------------------|------------------------------------------------------------------------------------------------------------------------------------------------------------------------------------------------------------------------------------------------------------------------------------------------------------------------------------------------------------------------------------------------------------------------------------------------------------------------------------------------------------------------------------------------------------------------------------------------------------------------------------------------------------------------------------------------------------------------------------------------------------------------------------------------------------------------------------------------------------------------------------------------------------------------------------------------------------------------------------------------------------------------------------------------------------------------------------------------------------------------------|----------------------------------------------------|
| <p>SASAdoctor Telemedicine Android App<br/>Francis Osiero,<br/>francis.osiero@sasadoctor.com</p> | <p>Kenya</p> | <p>05/02/2018</p> | <p>SASAdoctor Virtual Medical Care is an exciting new medical service which provides accessible and affordable high-quality medical care to Kenyans. SASAdoctor allows patients to consult with Kenyan trained and supervised medical doctors and clinical officers on an Android App via live video conferencing. This live face to face medical consultation will result in an assessment, diagnosis and if necessary, a signed prescription; a requisition for investigation; a signed sick note or a referral to a specialist. All these documents will be delivered right into the App on your phone. Every Kenyan will now be able to carry their entire personal medical record, maintained by a medical professional, in their SASAdoctor App on their device. Key features of SASAdoctor Virtual Medical Care includes:</p> <ul style="list-style-type: none"> <li>• Affordability: Consultation as low as \$5 and free for those with insurance.</li> <li>•Kenya Wide Coverage</li> <li>•Personal Medical Record</li> <li>•Good Medicine • Available 24/7</li> <li>•Medication Delivery • mLab services</li> </ul> | <p>Service delivery</p>                            |
| <p>Kenya Quality Model For Health e-tool<br/>Steven Wanyee,<br/>swanyee@intellisoftkenya.com</p> | <p>Kenya</p> | <p>01/01/2018</p> | <p>The Kenya Quality Model for Health is defined as a conceptual framework for guiding and supporting coordination in an integrated manner, efforts, and investments aimed at improving the quality of healthcare in Kenya. The eKQMH tool aims at providing health facilities with IT-based tools to support continuous quality improvement initiatives in line with the KQMH standard.</p>                                                                                                                                                                                                                                                                                                                                                                                                                                                                                                                                                                                                                                                                                                                                 | <p>Service delivery</p>                            |
| <p>Bethany Kids Kijabe Hospital Steven Wanyee, swanyee@intellisoftkenya.com</p>                  | <p>Kenya</p> | <p>01/06/2015</p> | <p>This is an OpenMRS based system. The purpose of the of the system was upgrade data managemnet elements which include efficiency in data management in terms of secure data storage, improved data capture methods, and provision of proper tools for data analysis to support provision of care.</p>                                                                                                                                                                                                                                                                                                                                                                                                                                                                                                                                                                                                                                                                                                                                                                                                                      | <p>Health information system, Service delivery</p> |

|                                                                 |       |            |                                                                                                                                                                                                                                                                                                                                                                                                                                                                                                                                                                                 |                  |
|-----------------------------------------------------------------|-------|------------|---------------------------------------------------------------------------------------------------------------------------------------------------------------------------------------------------------------------------------------------------------------------------------------------------------------------------------------------------------------------------------------------------------------------------------------------------------------------------------------------------------------------------------------------------------------------------------|------------------|
| Kenya Health & Empowerment Wade Munday, wmunday@addisclinic.org | Kenya | 01/05/2020 | The project uses asynchronous telemedicine to drive quality improvement in rural health settings and create equal access to digital health innovations for frontline health workers in Kenya. Local providers are given free access to a telemedicine platform and a global network of volunteer physicians who assist in the care of patients remotely and in less than 12 hours. The Addis Clinic staff in Kenya coordinate quality improvement through remote physician support, technology training and technical assistance, and continuing medical education.             | Service delivery |
| e-Hospital Steven Wanyee, swanyee@intellisoftkenya.com          | Kenya | 01/08/2017 | eHospital is an end-to-end hospital information system that integrates medical records system, lab system, and ERP in a distribution that addresses the workflows, forms, and reports of the East African market. In addition to being an end-to-end facility system which captures fundamental patient touchpoints, eHospital is a distribution of Bahmni. This essentially means that eHospital leverages the software excellence and technical architecture of a globally proven system backed by a strong community committed to the continuous development of the product. | Service delivery |

|                                                                                           |              |                   |                                                                                                                                                                                                                                                                                                                                                                                                                                                                                                                                                                                                                                                                                                                                                                                                                                                                                                                                                                                                                                                          |                                  |
|-------------------------------------------------------------------------------------------|--------------|-------------------|----------------------------------------------------------------------------------------------------------------------------------------------------------------------------------------------------------------------------------------------------------------------------------------------------------------------------------------------------------------------------------------------------------------------------------------------------------------------------------------------------------------------------------------------------------------------------------------------------------------------------------------------------------------------------------------------------------------------------------------------------------------------------------------------------------------------------------------------------------------------------------------------------------------------------------------------------------------------------------------------------------------------------------------------------------|----------------------------------|
| <p>COVID-19 SMS Data Collaboration Initiative<br/>Boris Maguire, boris@echomobile.org</p> | <p>Kenya</p> | <p>07/05/2020</p> | <p>COVID is having huge social and economic effects on Kenya's poor, and ground-level info is needed for data-driven solutions. We have partnered to collect this data by directly engaging 1M low-income Kenyans via interactive SMS. Social orgs across Kenya use Echo's platform to engage over 2M people monthly. These trusted connections present a unique opportunity to understand the impacts of COVID on the poor; in real time and at unparalleled scale. We propose to realize this opportunity by leveraging these connections. We are rallying Echo users to continuously engage their audiences with a standardized SMS data collection tool. To inform data collection content and ensure results feed practical action, Echo has partnered with the Population Council, a partner to Kenya's COVID Task Force and CDC Kenya. Together, we can provide unparalleled longitudinal insights on Kenya's most vulnerable communities, making targeted, data-driven action possible. But we need and are seeking funding to achieve this.</p> | <p>Health information system</p> |
| <p>DHIS2 for COVID-19 Surveillance: Kenya<br/>Rebecca Potter, covid@dhis2.org</p>         | <p>Kenya</p> | <p>08/05/2020</p> | <p>The DHIS2 digital data package for COVID-19 is designed to accelerate case detection, situation reporting, active surveillance and response in countries. The COVID-19 digital data package includes standard metadata aligned with the WHO's technical guidance on COVID-19 surveillance and has been adapted to local country context and language in this implementation.</p>                                                                                                                                                                                                                                                                                                                                                                                                                                                                                                                                                                                                                                                                      | <p>Health information system</p> |



|                                                                                                   |              |                   |                                                                                                                                                                                                                                                                                                                                                                                                                                                                                                                                                                                                                                                                                                                                                                                                                                                                                                                                                                                                           |                         |
|---------------------------------------------------------------------------------------------------|--------------|-------------------|-----------------------------------------------------------------------------------------------------------------------------------------------------------------------------------------------------------------------------------------------------------------------------------------------------------------------------------------------------------------------------------------------------------------------------------------------------------------------------------------------------------------------------------------------------------------------------------------------------------------------------------------------------------------------------------------------------------------------------------------------------------------------------------------------------------------------------------------------------------------------------------------------------------------------------------------------------------------------------------------------------------|-------------------------|
| <p>Mobile Solutions for Women and Children's Health (Mobile WACH) Keshet Ronen, keshet@uw.edu</p> | <p>Kenya</p> | <p>22/05/2020</p> | <p>Mobile WACH is an open-source human-computer hybrid SMS messaging platform. Mobile WACH sends pre-composed messages to clients at scheduled times. Clients may send messages at any time and a live healthcare worker (HCW) answers incoming messages, leading to personalized dialogue. The internet-based HCW interface contains a dashboard designed to facilitate HCW management of tasks such as message response, patient tracking, and message translation into English. The system back-end collects SMS metadata such as time stamps and delivery status, as well as data on seminal events such as childbirth. To date, Mobile WACH has been implemented in 8 studies (including 4 randomized controlled trials, RCTs) targeting a range of reproductive, maternal, neonatal and child health outcomes. Scheduled intervention messages were developed for each study based on formative research with the target population and behavioral theory selected based on the target outcome.</p> | <p>Service delivery</p> |
|---------------------------------------------------------------------------------------------------|--------------|-------------------|-----------------------------------------------------------------------------------------------------------------------------------------------------------------------------------------------------------------------------------------------------------------------------------------------------------------------------------------------------------------------------------------------------------------------------------------------------------------------------------------------------------------------------------------------------------------------------------------------------------------------------------------------------------------------------------------------------------------------------------------------------------------------------------------------------------------------------------------------------------------------------------------------------------------------------------------------------------------------------------------------------------|-------------------------|

|                                                                                                           |              |                   |                                                                                                                                                                                                                                                                                                                                                                                                                                                                                                                                                                                                                                                                                                                                                                                                                                                                                                                                                                                                                                |                                                                     |
|-----------------------------------------------------------------------------------------------------------|--------------|-------------------|--------------------------------------------------------------------------------------------------------------------------------------------------------------------------------------------------------------------------------------------------------------------------------------------------------------------------------------------------------------------------------------------------------------------------------------------------------------------------------------------------------------------------------------------------------------------------------------------------------------------------------------------------------------------------------------------------------------------------------------------------------------------------------------------------------------------------------------------------------------------------------------------------------------------------------------------------------------------------------------------------------------------------------|---------------------------------------------------------------------|
| <p>DawaSure                    francis                    munyeki,<br/>munyekif@cadcreations.co.ke</p>    | <p>Kenya</p> | <p>05/06/2020</p> | <p>Clinical Managing long-term illness and chronic conditions requires a continuous monthly supply of medicines, for example hypertension; diabetes, for a vast majority of the aged population without medical insurance these drugs depend on sponsor relatives (sons, daughters) to purchase. Due to this additional financial burden, the sponsor has to make difficult decisions each month spending on ongoing financial pressures they themselves are having. Therefore, they tend to shop around for medicines depending on the price. This often results in purchases of variants, equivalents of the prescribed medicine supplied ranging from different manufacturer, dosage, active components, derivatives and sometimes outright fakes, at the time of purchase. Dawasure works to the benefit of the patient by ensuring a regular and continuous supply of the right drugs each month. Dawasure works by creating a direct link between the patient and the manufacturer through the regular supply chain.</p> | <p>Service delivery, Access to medicine, vaccine and Technology</p> |
| <p>Living Goods- Community Health Innovation Network (CHIN) Fransicah Nzanga, fnzanga@livinggoods.org</p> | <p>Kenya</p> | <p>29/06/2020</p> | <p>CHIN's goal is to promote creative technology solutions that enable community health care to more seamlessly integrate with health facilities, while extending high-quality diagnostic technologies that reach clients at the community level. Initial innovations were: 1) a Closed Loop Referral system to digitally verify all CHW patient referrals where facility-based care took place, 2) Improved tech protocols for distributing HIV self-tests via CHWs, and 3) Predictive Analytics to identify and predict which households are most in need of medical attention. Current focus is Client Initiated Health Assessment (CIHA); a home-based self-triage assessment platform to guide patients and caregivers through an initial health screening and care-seeking journey directly linking them digitally to their local CHW. Implemented by</p>                                                                                                                                                                | <p>Service delivery</p>                                             |

|                                                                                                                                                             |       |            |                                                                                                                                                                                                                                                                                                                                                                                                                                                                                                                                                                                                                                                                                                                                                                                                                                                                                                                                                                                                                             |                  |
|-------------------------------------------------------------------------------------------------------------------------------------------------------------|-------|------------|-----------------------------------------------------------------------------------------------------------------------------------------------------------------------------------------------------------------------------------------------------------------------------------------------------------------------------------------------------------------------------------------------------------------------------------------------------------------------------------------------------------------------------------------------------------------------------------------------------------------------------------------------------------------------------------------------------------------------------------------------------------------------------------------------------------------------------------------------------------------------------------------------------------------------------------------------------------------------------------------------------------------------------|------------------|
|                                                                                                                                                             |       |            | Living Goods, Medic Mobile and THINKMD, CIHA seeks to investigate community level uptake of an integrated mHealth system that enables clients to more effectively request care and support.                                                                                                                                                                                                                                                                                                                                                                                                                                                                                                                                                                                                                                                                                                                                                                                                                                 |                  |
| Lwala Community Alliance x OpenFn: Building a real-time decision support tool to strengthen healthcare in western Kenya<br>Aleksa Krolls, aleksa@openfn.org | Kenya | 01/01/2017 | OpenFn powers Lwala's connected Health information system, integrating its CommCare case management CHW app with a central Salesforce-based patient database and automating secure, two-way information exchange for real-time monitoring and CHW decision support.                                                                                                                                                                                                                                                                                                                                                                                                                                                                                                                                                                                                                                                                                                                                                         | Service delivery |
| COVID-19 Service delivery Tracker Liz McNeil, lmcneil@jacarandahealth.org                                                                                   | Kenya | 17/07/2020 | Jacaranda Health partners with County governments to deploy low-cost, innovative solutions to the public health system in Kenya, to improve maternal and newborn health outcomes. In this project, we use our program tools to collate information from mothers about their experiences in facilities, and from providers about their challenges and performance. We have created a simple dashboard that is shared with county and facility managers to make more informed decisions. In the wake of the COVID-19 response, we have added the Service delivery challenges tracker where providers can update challenges in real-time to alert health system administrators. It is a simple map tool where users can see the status of individual facilities and the details of the reported challenges. Facilities are labeled as Red for significant challenges or Service delivery disruptions, Yellow for some challenges or Service delivery disruptions, and Green for no challenges or Service delivery disruptions. | Service delivery |

|                                                                          |              |                   |                                                                                                                                                                                                                                                                                                                                                                                                                                                                                                                                                                                                                                                                                                                                                                                                                                                                                                                                                                                                                                                                                                                                                                                             |                                                    |
|--------------------------------------------------------------------------|--------------|-------------------|---------------------------------------------------------------------------------------------------------------------------------------------------------------------------------------------------------------------------------------------------------------------------------------------------------------------------------------------------------------------------------------------------------------------------------------------------------------------------------------------------------------------------------------------------------------------------------------------------------------------------------------------------------------------------------------------------------------------------------------------------------------------------------------------------------------------------------------------------------------------------------------------------------------------------------------------------------------------------------------------------------------------------------------------------------------------------------------------------------------------------------------------------------------------------------------------|----------------------------------------------------|
| <p>KenyaEMR<br/>Pascal Mwele,<br/>Pascal.Mwele@thepalladiumgroup.com</p> | <p>Kenya</p> | <p>15/07/2020</p> | <p>KenyaEMR is a tailored distribution of OpenMRS which was developed by I-TECH (2012) but is currently being supported by The Palladium Group since 2016 under KeHMIS II Project. KenyaEMR is key towards aiding monitoring UNAIDS goals through;</p> <ul style="list-style-type: none"> <li>•Registrations &amp; Enrolments: HTS, ART, MCH, TB/HIV, PrEP, KP, OVC, Adolescents &amp; Young adults.</li> <li>•Triage: Vital signs, nutrition, and obstetric history</li> <li>•HIV Prevention: Key populations, PrEP, eHTS and PMTCT</li> <li>•HIV Treatment: Clinical workflow management; TB/HIV management; Patient management planning; and Differentiated care management and Outcome documentation</li> <li>•MCH Services: ANC, L&amp;D, PNC, HEI, FP and immunization services</li> <li>•Strategic Information: Line lists and reports (for Quality, Indicators, Surveillance, outcome, program and Ad hoc needs); Registers; Dashboards and Charts. Interoperability: with but not limited to; ADT (pharmacy management), T4A &amp; Ushauri (appointment management), mLab &amp; EID/VL (lab management), DHIS (automated indicator reporting) and 3PM (Key populations)</li> </ul> | <p>Health information system, Service delivery</p> |
|--------------------------------------------------------------------------|--------------|-------------------|---------------------------------------------------------------------------------------------------------------------------------------------------------------------------------------------------------------------------------------------------------------------------------------------------------------------------------------------------------------------------------------------------------------------------------------------------------------------------------------------------------------------------------------------------------------------------------------------------------------------------------------------------------------------------------------------------------------------------------------------------------------------------------------------------------------------------------------------------------------------------------------------------------------------------------------------------------------------------------------------------------------------------------------------------------------------------------------------------------------------------------------------------------------------------------------------|----------------------------------------------------|

|                                                                                            |              |                   |                                                                                                                                                                                                                                                                                                                                                                                                                                                                                                                                                                                                                                                                                                                                                                                                                                                                                                                                                        |                                  |
|--------------------------------------------------------------------------------------------|--------------|-------------------|--------------------------------------------------------------------------------------------------------------------------------------------------------------------------------------------------------------------------------------------------------------------------------------------------------------------------------------------------------------------------------------------------------------------------------------------------------------------------------------------------------------------------------------------------------------------------------------------------------------------------------------------------------------------------------------------------------------------------------------------------------------------------------------------------------------------------------------------------------------------------------------------------------------------------------------------------------|----------------------------------|
| <p>National Data Warehouse (NDWH) Pascal Mwele,<br/>pascal.mwele@thepalladiumgroup.com</p> | <p>Kenya</p> | <p>16/07/2020</p> | <p>The NDWH is both an analytics platform and a repository. As a national repository, NDWH hosts de-identified data to facilitate programmatic monitoring of Health information systems (HIS) implementations and progress on clinical care and outcomes for HIV infected and exposed persons. The primary source of data is the EMR deployed at facility level. As an analytics platform, the NDW supports the visualization of the progress towards UNAIDS 90:90:90 goals, case based surveillance, the tracking of metrics relating to Human resources for health (HRH), the Monitoring of performance for different program indicators in the HIV scope and supports ad hoc data analysis for verified users to support further data analysis needs required. Currently the NDW hosts data for over 2.2 million HIV positive persons and over 1.1M testing records for tested individuals from 8 EMRs in approximately 1200 active facilities.</p> | <p>Health information system</p> |
| <p>Interoperability Layer Pascal Mwele,<br/>pascal.mwele@thepalladiumgroup.com</p>         | <p>Kenya</p> | <p>26/08/2020</p> | <p>Interoperability Layer (IL) is a digital solution developed to orchestrate and broker data exchange across disparate systems at the facility level for care coordination and to higher levels for reporting and decision support. IL supports and enforces different standards through a channel configuration module. Currently, IL has a total of 7 participating systems in the country namely, Text for adherence (T4A)- which uses SMS/USDD for monitoring Adherence to ARVs and reporting problems, Ushauri - an automated appointment diary with a defaulter tracing module that ensures patients are seen and followed up in the shortest time possible, Web Antiretroviral Dispensing Tool (Web ADT), mobile Laboratory (mLab) which uses SMS for sending lab results from the national laboratories to a dedicated facility phone, Kenya's DHIS2, and IQCare and KenyaEMR.</p>                                                            | <p>Health information system</p> |

|                                                                    |       |            |                                                                                                                                                                                                                                                                                                                                                                                                                                                                                                                                                                                                                                                                                                                                                                                                                                                                                                                                                                                                                                                            |                                             |
|--------------------------------------------------------------------|-------|------------|------------------------------------------------------------------------------------------------------------------------------------------------------------------------------------------------------------------------------------------------------------------------------------------------------------------------------------------------------------------------------------------------------------------------------------------------------------------------------------------------------------------------------------------------------------------------------------------------------------------------------------------------------------------------------------------------------------------------------------------------------------------------------------------------------------------------------------------------------------------------------------------------------------------------------------------------------------------------------------------------------------------------------------------------------------|---------------------------------------------|
| DWAPI<br>Pascal Mwele,<br>pascal.mwele@thepalladiumgroup.com       | Kenya | 26/08/2020 | Also known as data warehouse upload tool, DWAPI is a multiplatform solution that is used to extract data from EMR databases in a defined extract format and transmit the encrypted extract to an API at national data warehouse staging area for further processing.                                                                                                                                                                                                                                                                                                                                                                                                                                                                                                                                                                                                                                                                                                                                                                                       | Health information system                   |
| Afya Mobile<br>Pascal Mwele,<br>pascal.mwele@thepalladiumgroup.com | Kenya | 26/08/2020 | An android based mobile application is used to capture HIV related data and specifically HIV Testing Services data. The application enables providers in health facilities and outreach services in the community to capture client demographics and fill HTS defined forms. The app is key in achieving community solutions towards reduction and finally elimination of the HIV pandemic                                                                                                                                                                                                                                                                                                                                                                                                                                                                                                                                                                                                                                                                 | Service delivery, Health information system |
| ENDCORONAVIRUS.CO.KE<br>Katherine Piets, kat@every1mobile.com      | Kenya | 09/03/2020 | <p>Every1Mobile self funded our END CORONAVIRUS KENYA project, a mobile-friendly, low data website in Kiswahili that provides critical handwashing guidance and easy access to accredited information on the COVID-19 disease from the World Health Organisation, local helplines and daily statistics. It contains the most important information about the virus and how users can protect themselves and their families, offering a series of interactive features to improve knowledge, attitudes and behaviours.</p> <p>The site is deployed using Every1Mobile's own existing social platform software, which is accessible through the most basic web-enabled feature phones, and is designed to consume as little data as possible. This means that we are able to reach anyone with minimal data coverage and access to any basic handset. Content is regularly updated using authoritative sources and presented in colloquial language, to ensure users have the most recent facts and guidance, and to reinforce attitudes and behaviours.</p> | Service delivery                            |

|                                                                                                      |       |            |                                                                                                                                                                                                                                                                                                                                                                                                                                                                                                                                                                                                                                                                                                                                                                                                                                                                                                                                                                                                                            |                                             |
|------------------------------------------------------------------------------------------------------|-------|------------|----------------------------------------------------------------------------------------------------------------------------------------------------------------------------------------------------------------------------------------------------------------------------------------------------------------------------------------------------------------------------------------------------------------------------------------------------------------------------------------------------------------------------------------------------------------------------------------------------------------------------------------------------------------------------------------------------------------------------------------------------------------------------------------------------------------------------------------------------------------------------------------------------------------------------------------------------------------------------------------------------------------------------|---------------------------------------------|
| m-Jali<br>Caroline Mbindyo,<br>caroline.mbindyo@mref.org                                             | Kenya | 21/09/2020 | A data collection tool used in the following intervention areas CBHMIS/Diarrhoea Triage tool/Socio Economic Mapping, Tool based on World Bank, Data Visualisation, Household Mapping, Geo-Tagging, National Safety, Net Program, Malaria Net Distribution, Malaria Pill, Distribution, Covid-19 Community Surveillance Module, NCD, triage tool, Referral tool                                                                                                                                                                                                                                                                                                                                                                                                                                                                                                                                                                                                                                                             | Health information system                   |
| Case Management Mobile App for Children with Disabilities<br>Jessica Charles,<br>jessica@kupenda.org | Kenya | 22/12/2020 | In partnership with Kuhenza, MIT, Boston University, Dimagi and Sabrams Consulting, Kupenda for the Children (www.kupenda.org) developed mobile app to support community-based care and Covid-19 prevention for children with disabilities. This app enables NGOs to track the physical, social, academic and emotional health of children with disabilities, based on Measure Evaluation's Child Status Index. The app also includes a reporting form that local leader child advocates use to document their child outreach efforts after completing a disability training program. Through the app leaders also access resources for family counseling (i.e., Service Referral Guide, Home Visit Guide, Disability Guidebook, Disability Law Guide). Based on the leaders' reports, NGO staff provide support to children who show signs of malnutrition, illness, Covid-19, or abuse. We are also integrating the app with GIS mapping software that shows where the children live and helps connect them to services. | Service delivery, Health information system |
| Ohospital<br>Daniel Kimani,<br>suhadetechkenya@gmail.com                                             | Kenya | 10/03/2020 | Ohospital is a digital telehealth platform connecting patients to health providers. We use Software as a service, mobile app, and USSD to deliver the services. We are in our early stages and growing with about 33 doctors working with us.                                                                                                                                                                                                                                                                                                                                                                                                                                                                                                                                                                                                                                                                                                                                                                              | Service delivery                            |

|                                                            |         |            |                                                                                                                                                                                                                                                                                                                                                                                                                                                                                                                                                                                                                                                                                                                                                                                                                                                                                                                                                                            |                                             |
|------------------------------------------------------------|---------|------------|----------------------------------------------------------------------------------------------------------------------------------------------------------------------------------------------------------------------------------------------------------------------------------------------------------------------------------------------------------------------------------------------------------------------------------------------------------------------------------------------------------------------------------------------------------------------------------------------------------------------------------------------------------------------------------------------------------------------------------------------------------------------------------------------------------------------------------------------------------------------------------------------------------------------------------------------------------------------------|---------------------------------------------|
| PaperEMR Pratap Kumar, pratap@health-e-net.org             | Kenya   | 09/11/2021 | <p>PaperEMR is a solution for digital data to be captured directly from paper, by simply taking a picture!</p> <p>Healthcare documentation is commonly done on paper. Going "paper-less" is expensive and complex for most organisations. PaperEMR enables organisations, with or without other digital systems, to use paper-based tools and workflows to generate high-quality digital data.</p> <p>Existing paper-based tools are slightly modified for digital data capture. Information entered on paper is captured by taking a picture on any device with a browser and camera, including feature phones. Data is captured directly on the device, reviewed by the user, and shared to the cloud either over the internet or by SMS. PaperEMR unlocks a variety of possibilities, including simplified M&amp;E, operational improvements (faster availability and use of data), and delivery of novel services, including telemedicine and referral management.</p> | Service delivery, Health information system |
| DHIS2 MoH Data Warehouse Tsele Moloeli, moloelit@yahoo.com | Lesotho | 16/06/2020 | <p>DHIS2 aims at capturing of weekly, monthly and quarterly aggregate reports and event based data capturing from all health facilities and hospitals for the benefit of reporting to Ministry of Health so that analysis of data may be done from a warehouse perspective that eliminates data silos. The implementation is fully fleshed, more additions however of data sets and indicators are constantly being added on request and modifications</p>                                                                                                                                                                                                                                                                                                                                                                                                                                                                                                                 | Health information system                   |
| Lesotho eRegister Monaheng Maoeng, monaheng.maoeng@gov.ls  | Lesotho | 05/01/2018 | <p>eRegister aims at digitizing the HIV ART card and TB cab in order to produce a digital TB and ART register and to report to DHIS2 Presumptive TB Case quarterly report and the monthly HIV Care and treatment report. This eRegister when fully functional and rolled out country wide with a shared health records layer</p>                                                                                                                                                                                                                                                                                                                                                                                                                                                                                                                                                                                                                                           | Service delivery, Health information system |



|                                                                                                                                        |         |            |                                                                                                                                                                                                                                                                                                                                                                                                                                                                                                          |                                                              |
|----------------------------------------------------------------------------------------------------------------------------------------|---------|------------|----------------------------------------------------------------------------------------------------------------------------------------------------------------------------------------------------------------------------------------------------------------------------------------------------------------------------------------------------------------------------------------------------------------------------------------------------------------------------------------------------------|--------------------------------------------------------------|
|                                                                                                                                        |         |            | across facilities, it will then develop into a fully fledged Electronic Medical Records system.                                                                                                                                                                                                                                                                                                                                                                                                          |                                                              |
| HIV and Health Situation Rooms Masebeo Koto, kotomasebeo@gmail.com                                                                     | Lesotho | 06/01/2018 | The HIV and Health Situation Room seeks to address the analysis of HIV situation using cutting edge analytics technology with rich displays and elaborate multiple chat analysis to advice high Government officials on action plans. currently it focuses on HIV, PMTCT and it will grow into a full Health situation room. It was launched officially on the 8th May 2018.                                                                                                                             | Health information system                                    |
| Blood Safety Strengthening Programme: Blood Safety Information System (BSIS) Implementation Rhonwyn Cornell, rhonwyn.cornell@jembi.org | Lesotho | 01/12/2015 | Safe blood is used to treat postpartum haemorrhage, childhood malaria, severe anemia, trauma and surgery. The BSSP develops and implements BSIS, an open source system designed to manage donor and donation information from the point of donation to transfusion. BSIS is for resource-limited blood services and supports AfSBT accreditation processes. Our implementations follows international good practice, building local capacity within the blood services to use, manage and maintain BSIS. | Service delivery                                             |
| Lab Information System Malebanye Lerotholi, 4malbe@gmail.com                                                                           | Lesotho | 01/01/2014 | This is a national lab information system for capturing lab results and giving back feedback.                                                                                                                                                                                                                                                                                                                                                                                                            | Service delivery                                             |
| SMS Notification System Tsele Moloeli, moloet@yahoo.com                                                                                | Lesotho | 01/11/2017 | Sms notifications for urgent lab tests results like EID, Viral load etc. Clients are notified to report to their respective health facility to pick the results which shall be viewed online by the clinician upon arrival or before.                                                                                                                                                                                                                                                                    | Service delivery                                             |
| Electronic Logistics Management and Inventory Management System Monaheng Maoeng, monaheng.maoeng@gov.ls                                | Lesotho | 10/11/2020 | Manages the pharmacy store rooms logistics and inventory                                                                                                                                                                                                                                                                                                                                                                                                                                                 | Service delivery, Access to medicine, vaccine and technology |

|                                                                                          |                |                   |                                                                                                                                                                                                                                                                                                                                                                                                                                                                                                                                                                                                                                                                                                                                                                                                                                                                                                                                                                                                                                                   |                                                    |
|------------------------------------------------------------------------------------------|----------------|-------------------|---------------------------------------------------------------------------------------------------------------------------------------------------------------------------------------------------------------------------------------------------------------------------------------------------------------------------------------------------------------------------------------------------------------------------------------------------------------------------------------------------------------------------------------------------------------------------------------------------------------------------------------------------------------------------------------------------------------------------------------------------------------------------------------------------------------------------------------------------------------------------------------------------------------------------------------------------------------------------------------------------------------------------------------------------|----------------------------------------------------|
| <p>CITIZEN APP Pule Phafane,<br/>pule@smartmycompany.com</p>                             | <p>Lesotho</p> | <p>15/06/2020</p> | <p>CITIZEN APP is a complete Outbreak Management System for COVID-19 that can assist various spheres Government in their efforts to stop the virus spread. The main features are:</p> <ol style="list-style-type: none"> <li>1. Virus Tracking &amp; Quarantine Enforcement - Tracks movement of citizens and patients</li> <li>2. Contact Tracing – Real-time outbreak tracking by Country, District, Village/Town and Street and building.</li> <li>3. Social Distancing Infection Risk Alert – Alerts users when they are or have been in an area with infection risk levels.</li> <li>4. Queue Management - allows testing stations, NGO's, Government and business to manage appointments, scheduling through in-app digital queening.</li> <li>5. Surveys - Conduct and capture real time surveys and additional statistical information to help Government make informed decisions.</li> <li>6. Market Place – An in-app e-commerce platform that extents economic trading on medical supplies and other products and services.</li> </ol> | <p>Service delivery, Health information system</p> |
| <p>DHIS2-Covid -19 surveillance -Lesotho Monaheng Maoeng,<br/>monaheng.maoeng@gov.ls</p> | <p>Lesotho</p> | <p>15/06/2020</p> | <p>This project aims at managing covid19 patients and to provide statistics required for reporting on covid19. Tracker capture app is mainly used to track covid19 suspects and contacts. Stages involved are 1. screening 2. contact monitoring 3. case investigation 4. case monitoring 5. contact tracing. Alerts are also captured using data entry app per facility nationally.</p>                                                                                                                                                                                                                                                                                                                                                                                                                                                                                                                                                                                                                                                          | <p>Health information system</p>                   |

|                                                                                                       |         |            |                                                                                                                                                                                                                                                                                                                                                                                                                                                                                                                                                                                                                                                                                                                                                                                                                                                                                                                                                                                                                                                             |                           |
|-------------------------------------------------------------------------------------------------------|---------|------------|-------------------------------------------------------------------------------------------------------------------------------------------------------------------------------------------------------------------------------------------------------------------------------------------------------------------------------------------------------------------------------------------------------------------------------------------------------------------------------------------------------------------------------------------------------------------------------------------------------------------------------------------------------------------------------------------------------------------------------------------------------------------------------------------------------------------------------------------------------------------------------------------------------------------------------------------------------------------------------------------------------------------------------------------------------------|---------------------------|
| Bophelo-Ka-Mosebeletsi (Village Healthcare Workers) Application Teboho Khoali, teboho.khoali@undp.org | Lesotho | 16/06/2020 | Village Healthcare Workers (VHW) is a Lesotho's primary and a community-based healthcare unit comprising of community members who volunteered to support and provide linkages to the Ministry of Health healthcare system by undertaking community health related tasks. The unit has been more mandatory during the COVID-19 pandemic through execution of awareness campaigns in communities, monitoring individuals in home quarantine and reporting suspects of COVID-19 who have international travel history or symptoms to healthcare facilities and authorities. Since VHW unit used paper-based system from its origin, inefficiency and handling of bulk data challenges were being realised, and reports would be submitted after a week or a month time to the facilities. To eradicate this challenges, UNDP Lesotho Accelerator Lab developed a system which collects COVID-19 related data in communities and sends reports to healthcare centers and ministry's management in real-time for quick turnarounds in strategic decision making. | Health information system |
| EADEL - EGPAF Analytics Data Engine Lesotho Sele Mthimkhulu, smthimkhulu@pedaids.org                  | Lesotho | 24/06/2020 | Data capturing and reporting for EGPAF Lesotho, used by Records Assistants, SI&E Officers and Advisors, better reporting.                                                                                                                                                                                                                                                                                                                                                                                                                                                                                                                                                                                                                                                                                                                                                                                                                                                                                                                                   | Health information system |
| Client Tracking Application Sele Mthimkhulu, smthimkhulu@pedaids.org                                  | Lesotho | 24/06/2020 | Track all the clients and sent SMS reminder for appointments, 208 users                                                                                                                                                                                                                                                                                                                                                                                                                                                                                                                                                                                                                                                                                                                                                                                                                                                                                                                                                                                     | Service delivery          |
| mHero Liberia IntraHealth International, mHero@intrahealth.org                                        | Liberia | 01/01/2014 | mHero is a two-way, mobile phone-based communication system that uses basic text messaging, or SMS, to connect ministries of health and health workers. mHero operates on simple talk-and-text mobile devices—no smartphone or tablet required. IntraHealth International and UNICEF created mHero in August 2014 to support health-sector communication during the Ebola outbreak in Liberia.                                                                                                                                                                                                                                                                                                                                                                                                                                                                                                                                                                                                                                                              | Service delivery          |

|                                                                                |         |            |                                                                                                                                                                                                                                                                                                                                                                                                                                                                                                                                                                                                                                                                                                                                                                                                                                                                                                                                                                                                                                                                |                           |
|--------------------------------------------------------------------------------|---------|------------|----------------------------------------------------------------------------------------------------------------------------------------------------------------------------------------------------------------------------------------------------------------------------------------------------------------------------------------------------------------------------------------------------------------------------------------------------------------------------------------------------------------------------------------------------------------------------------------------------------------------------------------------------------------------------------------------------------------------------------------------------------------------------------------------------------------------------------------------------------------------------------------------------------------------------------------------------------------------------------------------------------------------------------------------------------------|---------------------------|
| mHero in Liberia Intrahealth International,<br>digitalhealth@intrahealth.org   | Liberia | 01/12/2013 | mHero was developed to link health worker data in iHRIS to RapidPro so Ministry of Health staff could communicate with frontline health workers during the Ebola crisis                                                                                                                                                                                                                                                                                                                                                                                                                                                                                                                                                                                                                                                                                                                                                                                                                                                                                        | Health information system |
| Liberia Health Analytics Platform (LHAP)<br>Claire Cravero, claire@zenysis.com | Liberia | 01/01/2018 | <p>The Zenysis software integrates data from fragmented systems through a generalized interoperability layer that uses data science techniques to harmonize the differences between integrated systems without requiring any modification to the systems themselves.</p> <p>In 2018, Liberia’s National Public Health Institute (NPHIL) and the Ministry of Health (MOH) partnered with Zenysis to improve infectious disease surveillance, data quality, supervision and capacity for data-driven decision-making. In Liberia, Zenysis integrates more than five fragmented data sources for the first time, including lab data, weekly disease surveillance data and routine Health information system data from DHIS 2.</p> <p>This partnership with Zenysis allowed the MOH and NPHIL generate analyses that they used to influence health sector policy planning, resource allocation and intervention design. The rapid integration of data systems helped Liberia target activities to strengthen health systems to improve public health outcomes.</p> | Health information system |

|                                                                                             |                   |                   |                                                                                                                                                                                                                                                                                                                                                                                                                                                                                                                                                                                                                                                                                                                                                                                                                                                                                                                                                                                                                                                                                                                    |                                                    |
|---------------------------------------------------------------------------------------------|-------------------|-------------------|--------------------------------------------------------------------------------------------------------------------------------------------------------------------------------------------------------------------------------------------------------------------------------------------------------------------------------------------------------------------------------------------------------------------------------------------------------------------------------------------------------------------------------------------------------------------------------------------------------------------------------------------------------------------------------------------------------------------------------------------------------------------------------------------------------------------------------------------------------------------------------------------------------------------------------------------------------------------------------------------------------------------------------------------------------------------------------------------------------------------|----------------------------------------------------|
| <p>mTOMADY Jennifer Bencivenga,<br/>jb@mtomady.com</p>                                      | <p>Madagascar</p> | <p>01/05/2017</p> | <p>mTOMADY is a digital end-to-end platform for financial inclusion in healthcare. It improves access to essential health services, strengthens resilience against medical impoverishment, and supports efforts to achieve Universal Health Coverage in low-resource settings. The platform connects beneficiaries, healthcare providers, and payers over the existing mobile money infrastructure, and enables the secure exchange of healthcare payments and structured data. mTOMADY is used by:</p> <ul style="list-style-type: none"> <li>- Beneficiaries to access health information and financing;</li> <li>- Healthcare providers to send data and receive delay-free payments;</li> <li>- Payers, such as governments, health insurance providers, or donors to manage beneficiaries, claims, and payouts. Automated results based-payments can also be used to incentivize community health workers or agents.</li> </ul> <p>mTOMADY circumvents restrictions on smartphone ownership and internet access, enabling it to function in the most remote, low-resource, and infrastructure poor areas.</p> | <p>Healthcare finance,<br/>Service delivery</p>    |
| <p>USAID ACCESS m-health initiative<br/>Stephanie Ranaivo,<br/>sranaivo@usaidaccess.org</p> | <p>Madagascar</p> | <p>01/10/2018</p> | <p>The ACCESS m-health project aims to improve the quality of both services and data collection, reporting and use. A mobile application which uses CommCare platform (www.dimagi.com) has been built. It integrates Madagascar Ministry of Public Health algorithms, validation checks, job aids, and digital reporting forms. The app has two versions: One version for the community health volunteers (CHV) has modules on family planning, maternal health, child health, growth monitoring, promotion of healthy behaviors, stock information, referrals, community-based surveillance, and monthly activity reporting. The health centers version has modules on CHV supervision (consultation of CHV reports, calculation of CHV performance score,</p>                                                                                                                                                                                                                                                                                                                                                    | <p>Service delivery, Health information system</p> |

|                                                                                     |            |            |                                                                                                                                                                                                                                                                                                                                                                                                                                                                                                                     |                                                              |
|-------------------------------------------------------------------------------------|------------|------------|---------------------------------------------------------------------------------------------------------------------------------------------------------------------------------------------------------------------------------------------------------------------------------------------------------------------------------------------------------------------------------------------------------------------------------------------------------------------------------------------------------------------|--------------------------------------------------------------|
|                                                                                     |            |            | inventory of available registers on site) and monitoring of referrals made by CHVs (development of e-learning modules is ongoing). Over 350 users have been trained so far, and are using the app. Over 5,000 users are planned by 2023.                                                                                                                                                                                                                                                                            |                                                              |
| Covid-19 DHIS 2 Rebecca Potter, covid@dhis2.org                                     | Madagascar | 08/05/2020 | The DHIS2 digital data package for COVID-19 is designed to accelerate case detection, situation reporting, active surveillance and response in countries. The COVID-19 digital data package includes standard metadata aligned with the WHO's technical guidance on COVID-19 surveillance and has been adapted to local country context and language in this implementation.                                                                                                                                        | Health information system                                    |
| The Malawi Digital Village Clinic (DVC) Christopher Kulanga, chriskulanga@gmail.com | Malawi     | 01/06/2012 | The Digital Village Clinic is community based decision support mobile application running on android phones, integrating health service packages offered by trained community health workers called Health Surveillance Assistants (HSAs). The DVC has integrated: Community Integrated Management of Child Illnesses (CIMCI), Community Based Maternal and Neonatal Health (CBMNH), Community Based Family Planning (CBFP) and cStock. The DVC allows to switch ON/OFF any of the above based on the HSAs profile. | Service delivery                                             |
| cStock - EPI Erick Mwale, Erick.Mwale@savethechildren.org                           | Malawi     | 09/01/2018 | Adaptation of the existing cStock system to allow for health facilities to report on EPI commodities via SMS.                                                                                                                                                                                                                                                                                                                                                                                                       | Service delivery, Access to medicine, vaccine and Technology |
| UBALE (MIRA STUDY) Dane Fredenburg, dane.fredenburg@crs.org                         | Malawi     | 01/07/2016 | The MIRA Study App measures the resilience by the people affected by the droughts in 2015 and how they are responding to shocks caused by the droughts. A network of field agents have been trained to administer a survey to selected households in the targeted areas, monthly. The data collected from a series of sentinel sites in southern Malawi is used to map out, with high precision, where the most food insecure                                                                                       | Health information system                                    |

|                                                                                                       |        |            |                                                                                                                                                                                                                                                                                                                                                                                                                                                                                                                        |                                             |
|-------------------------------------------------------------------------------------------------------|--------|------------|------------------------------------------------------------------------------------------------------------------------------------------------------------------------------------------------------------------------------------------------------------------------------------------------------------------------------------------------------------------------------------------------------------------------------------------------------------------------------------------------------------------------|---------------------------------------------|
|                                                                                                       |        |            | households are, informing targeting decisions to improve food security and nutrition.                                                                                                                                                                                                                                                                                                                                                                                                                                  |                                             |
| Medic at St Gabriel's Hospital Alex Ngalande, unknown@yahoo.com                                       | Malawi | 26/01/2018 | A DIY version of the Medic Mobile platform, allowing the St Gabriel's team to use their health volunteers to register pregnant mothers and adapt it for palliative care.                                                                                                                                                                                                                                                                                                                                               | Health information system, Service delivery |
| ONSE - Mobile Village Toolkit Rudi Thetard - ONSE Chief of Party, rthetard@msh.org                    | Malawi | 15/11/2016 | Health systems strengthening: Quality, accessible, high-impact interventions in IMCI, MNCH, FP/RH, malaria, WASH, and nutrition at the facility and community levels depends on reliable platforms for community engagement and feedback, in this case CommCare mHealth platform.                                                                                                                                                                                                                                      | Service delivery                            |
| ONSE - Integrated Supportive Supervision Toolkit Rudi Thetard - ONSE Chief of Party, rthetard@msh.org | Malawi | 15/11/2016 | The tool supports programme supervision for health facilities at the various levels of care                                                                                                                                                                                                                                                                                                                                                                                                                            | Service delivery, Health information system |
| ARGUS Joseph Wu, wcsg@lukeinternational.no                                                            | Malawi | 01/08/2017 | This is a pilot project supported by UNICEF and WHO to implement a mobile health (mHealth solution) developed by WHO to strengthen Malawi's integrated diseases surveillance and response (IDSR) system and aiming to deploy in 14 districts of Malawi to generate weekly IDSR reports onward. The solution is to implement SMS connection between health facilities and Epidemiology units to submit weekly IDSR report. Management dashboard will be deployed at national and district level for surveillance use.   | Health information system                   |
| Supporting LIFE Joseph WU, wcsg@lukeinternational.no                                                  | Malawi | 01/05/2013 | The Supporting Low-cost Intervention for disease control (Supporting LIFE) project is designed to support HSAs at the patient point-of-care as well as larger epidemiological bodies to manage and control diseases through the utilization of cost-effective technologies through large scale community trial. The overarching objective of the Supporting LIFE project is to assist HSAs in delivering an intervention to improve and manage disease control, targeting children aged $\geq 2$ months up to 5 years. | Service delivery                            |

|                                                                                                                          |        |            |                                                                                                                                                                                                                                                                                                                                                                                                                                                                                                               |                                             |
|--------------------------------------------------------------------------------------------------------------------------|--------|------------|---------------------------------------------------------------------------------------------------------------------------------------------------------------------------------------------------------------------------------------------------------------------------------------------------------------------------------------------------------------------------------------------------------------------------------------------------------------------------------------------------------------|---------------------------------------------|
| Malawi electronic integrated disease surveillance and response system (Malawi eIDSR) Joseph Wu, wcs@lukeinternational.no | Malawi | 01/03/2016 | Thee project is to extend the existing infrastructure of EMRs and implement an eIDSR system to facilitate real-time detection and reporting of notifiable disease cases. Activities include: Enhance and development of border posts health surveillance system, optimize the existing national EMRs for surveillance purposes, develop and deploy eIDSR system management dashboard, deploy the integrated eIDSR system and functions to selected health facilities, capacity building and ongoing supports. | Health information system, Service delivery |
| One Community Steve Choko, stevec@jhuccpmw.org                                                                           | Malawi | 15/12/2015 | One Community digital health system is a BI-DIRECTIONAL referral system. This means that referrals may be issued by CRPs to facilities and/or community services; referrals may also be issued by RLFs or community service facilitators into the One Community program. CHWs are given tablets for data collection, entry and other program-related activities. After data collection, data is entered on CommCare Android app and synchronized with the server where all data is stored.                    | Service delivery, Health information system |
| Malawi EID ART Initiation Tracking Sean Blaschke, sblaschke@unicef.org                                                   | Malawi | 01/02/2017 | The project uses a system developed using RapidSMS framework to track EID ART Initiations. HCWs register samples when they are collected using numbers printed on Pink cards. When sample are picked from Health centers, they are also crosschecked at the district lab to ensure the meet all standard before they proceed to the reference lab. Lab personnel confirm receipt of sample through sms.                                                                                                       | Service delivery                            |
| eIDSR Case Based Surveillance App Malawi Soyapi Mumba, soyapim@gmail.com                                                 | Malawi | 01/02/2017 | The Epidemiology department of Ministry of Health is responsible for surveillance of key epidemic-prone diseases such as cholera, Ebola and ensuring timely response on reported cases.                                                                                                                                                                                                                                                                                                                       | Health information system                   |
| Chipatala Cha Pa Foni (CCPF) Health Center by Phone Malawi Carla Blauvelt, carla.blauvelt@villagereach.org               | Malawi | 01/09/2015 | CCPF connects rural communities to mobile-based, personalized Ministry of Health-verified health information and referrals to extend the                                                                                                                                                                                                                                                                                                                                                                      | Service delivery                            |



|                                                                                                                                                        |        |            |                                                                                                                                                                                                                                                                                                                                                                                                                                                                                                                 |                                                                |
|--------------------------------------------------------------------------------------------------------------------------------------------------------|--------|------------|-----------------------------------------------------------------------------------------------------------------------------------------------------------------------------------------------------------------------------------------------------------------------------------------------------------------------------------------------------------------------------------------------------------------------------------------------------------------------------------------------------------------|----------------------------------------------------------------|
|                                                                                                                                                        |        |            | reach of health services and reduce burden on health facilities.                                                                                                                                                                                                                                                                                                                                                                                                                                                |                                                                |
| Barr Foundation iCCM mHealth project Erica Layer, elayer@d-tree.org                                                                                    | Malawi | 03/02/2016 | The ultimate goal is to provide a holistic, high quality care in iCCM. The HSA supervisor component has the iCCM supervisory checklists to guide the SHSAs during routing program supervision. Online iCCM dashboards displayed usage statistics and program performance information                                                                                                                                                                                                                            | Health information system, Service delivery                    |
| CMAM Stock Monitoring System Malawi Sylvester Kathuma, kathumbasylvester@gmail.com                                                                     | Malawi | 01/12/2017 | It is SMS based system to monitor and track availability of key nutrition commodities at health facility level                                                                                                                                                                                                                                                                                                                                                                                                  | Access to medicines, vaccines and technology, Service delivery |
| Medic Mobile DIY Malawi Jacqueline Edwards, jacqueline@medicmobile.org                                                                                 | Malawi | 01/01/2018 | Using Medic Mobile textforms and DIY platform to register patients for ANC and palliative care follow up and referrals                                                                                                                                                                                                                                                                                                                                                                                          | Service delivery, Health information system                    |
| MNCH mobile content with nutrition focus, available in Chichewa, Tumbuka and English in SMS and voice transcript format Kim Viljoen, kviljoen@gsma.com | Malawi | 01/09/2013 | The GSMA, together with its global content consortium lead by CABI, developed open-source nutrition and MNCH mobile ready content for Malawi available in Chichewa, Tumbuka and English. All content was produced by in-country specialists and is based on recommended MNCH and local nutrition practices. The Ministry of Health played a vital role in the development and content validation. The Content is available in the form of: topic-specific factsheets, SMSs and voice message transcripts.       | Service delivery                                               |
| OpenLMIS Malawi Rebecca Alban, info@openlmis.org                                                                                                       | Malawi | 01/12/2017 | OpenLMIS is a state-of-the-art, web-enabled, enterprise class electronic LMIS solution that facilitates the requisition and resupply process in low-resource settings for health commodities. The result is more complete, accurate and timely data for decision-making— essential to reducing stockouts, managing waste and losses, and operating an effective and efficient supply chain. Users range from facility-level staff/nurses/pharmacists, to national level managers who approve and ship products. | Access to medicine, vaccine and technology, Service delivery   |

|                                                                                           |        |            |                                                                                                                                                                                                                                                                                                                                                                                                                                                                                                                                                                                                                                                                                                                                                                                                                                                                                                                                                                                                |                           |
|-------------------------------------------------------------------------------------------|--------|------------|------------------------------------------------------------------------------------------------------------------------------------------------------------------------------------------------------------------------------------------------------------------------------------------------------------------------------------------------------------------------------------------------------------------------------------------------------------------------------------------------------------------------------------------------------------------------------------------------------------------------------------------------------------------------------------------------------------------------------------------------------------------------------------------------------------------------------------------------------------------------------------------------------------------------------------------------------------------------------------------------|---------------------------|
| Fetal Monitoring device and mobile decision support<br>Chris Kulanga, Ckulanga@D-tree.org | Malawi | 18/09/2018 | Development and use of low-cost fetal monitoring device linked to a mobile application. Used in the facility to guide midwives through assessing fetal monitoring and follow protocols based on the uterine contractions and fetal heart rate and providing decision support based on the pregnant women's data.                                                                                                                                                                                                                                                                                                                                                                                                                                                                                                                                                                                                                                                                               | Service delivery          |
| Malawi German Health Programme (MGHP)<br>Simon Ndira, simon.ndira@giz.de                  | Malawi | 01/01/2017 | We are strengthening health systems with a focus on reproductive health. In this context, we are implementing digital solutions to generate reliable data for decision support across all levels of care. Digital interventions include: roll out of e-Register platform in 10 health facilities, roll out of infrastructure to enable capturing data from health centers directly into DHIS2 in the 40 MGHP health facilities, introduction of the Quality of Care and Performance Index of MoHP, extension of the Government Wide Area Network (GWAN) to select health facilities, promotion of data use for decision support through the quality improvement and work improvement support teams in health facilities; strengthening digital governance and digital leadership at national level, including contribution to the drafting of the digital health strategy, definition of national health indicators, drafting of standard operating procedures for HIS among other activities. | Health information system |
| DHIS2 for COVID-19 Surveillance: Malawi<br>Rebecca Potter, covid@dhis2.org                | Malawi | 08/05/2020 | The DHIS2 digital data package for COVID-19 is designed to accelerate case detection, situation reporting, active surveillance and response in countries. The COVID-19 digital data package includes standard metadata aligned with the WHO's technical guidance on COVID-19 surveillance and has been adapted to local country context and language in this implementation.                                                                                                                                                                                                                                                                                                                                                                                                                                                                                                                                                                                                                   | Health information system |

|                                                                                                                 |               |                   |                                                                                                                                                                                                                                                                                                                                                                                                                                                                                                                                                                                                                                                                                                                                                                                                                                                                                                                                                                                                                                                |                                  |
|-----------------------------------------------------------------------------------------------------------------|---------------|-------------------|------------------------------------------------------------------------------------------------------------------------------------------------------------------------------------------------------------------------------------------------------------------------------------------------------------------------------------------------------------------------------------------------------------------------------------------------------------------------------------------------------------------------------------------------------------------------------------------------------------------------------------------------------------------------------------------------------------------------------------------------------------------------------------------------------------------------------------------------------------------------------------------------------------------------------------------------------------------------------------------------------------------------------------------------|----------------------------------|
| <p>Post disaster IDSR Strengthening in 14 targeted districts of Malawi Joseph Wu, wmsg@lukeinternational.no</p> | <p>Malawi</p> | <p>06/08/2019</p> | <p>In March 2019, Cyclone Idai affected 15 districts in Malawi. After the initial response to the emergency, the government noticed the surveillance systems in the districts was not fully equipped and recommended enhancement. One Health Surveillance Platform with coordinated Integrated Disease Surveillance and Response system (IDSR) was desired by the government. A UNICEF funded Argus pilot in 2017 implemented by Luke International (LIN) was able to improve the country's weekly IDSR reporting rate from 0.57% (early 2017) to 31.7% (2018). LIN has been working with the MoH to strengthen the IDSR system through developments of various digital solutions, including DHIS2. Hence, UNICEF commissioned LIN for this project with MoH approval and support. The goal of this project is to improve IDSR reporting timeliness and completeness in 14 flood-prone targeted districts through a customized DHIS2 mobile application integrated with the national DHIS2 instance with One Health Surveillance approach.</p> | <p>Health information system</p> |
|-----------------------------------------------------------------------------------------------------------------|---------------|-------------------|------------------------------------------------------------------------------------------------------------------------------------------------------------------------------------------------------------------------------------------------------------------------------------------------------------------------------------------------------------------------------------------------------------------------------------------------------------------------------------------------------------------------------------------------------------------------------------------------------------------------------------------------------------------------------------------------------------------------------------------------------------------------------------------------------------------------------------------------------------------------------------------------------------------------------------------------------------------------------------------------------------------------------------------------|----------------------------------|

|                                                                                                        |               |                   |                                                                                                                                                                                                                                                                                                                                                                                                                                                                                                                                                                                                                                                                                                                                                                                                                                                                                                                                                                                                                                                                                                                                                                                                                                                         |                                                    |
|--------------------------------------------------------------------------------------------------------|---------------|-------------------|---------------------------------------------------------------------------------------------------------------------------------------------------------------------------------------------------------------------------------------------------------------------------------------------------------------------------------------------------------------------------------------------------------------------------------------------------------------------------------------------------------------------------------------------------------------------------------------------------------------------------------------------------------------------------------------------------------------------------------------------------------------------------------------------------------------------------------------------------------------------------------------------------------------------------------------------------------------------------------------------------------------------------------------------------------------------------------------------------------------------------------------------------------------------------------------------------------------------------------------------------------|----------------------------------------------------|
| <p>Electronic Participant Locator (ePAL) Luke Banda, lsbanda@mlw.mw</p>                                | <p>Malawi</p> | <p>01/04/2022</p> | <p>Malawi, like many low-income settings, has no municipal address system. The rapid proliferation of urban high-density housing and slums in Africa and Asia is highly conducive to the spread of disease and makes it extremely difficult for public health officials and researchers to identify hotspots of disease transmission. ePAL is a simple, low-cost geolocation digital health innovation that allows real-time capture of GPS coordinates (e-locate) from important sites of disease transmission at high resolution (within 2 metre) by health workers and researchers working remotely from patient households (e.g. GPS coordinates of a patient's household can be captured while the patient is physically in the clinic, without the need for a home visit). To ensure accuracy and ease follow-ups, ePAL has a function (e-tag) that allows health workers and researchers to capture pictures of landmarks and other relevant sites and upload them to a server. ePAL also presents opportunities to public and private organisations (e.g. banks) that currently still use paper-based maps to identify locations of clients. Paper-based maps are often prone to error and inaccuracy, leading to difficulties in tracking.</p> | <p>Health information system, Service delivery</p> |
| <p>Advanced mobile toolkit alongside Muso's ProCCM model in Mali Fatou Fall, fatou@medicmobile.org</p> | <p>Mali</p>   | <p>16/01/2017</p> | <p>An advanced smartphone application for CHWs to support, coordinate, and track the work of CHWs coupling with tools for supervisors and dashboards for health managers at multiple levels of the health system (health centers, districts, regional and national). Currently, we are implementing mobile health tools to improve malaria Rapid Diagnostic Test (mRDT) quality, coverage, and equity as part of integrated primary health care delivery.</p>                                                                                                                                                                                                                                                                                                                                                                                                                                                                                                                                                                                                                                                                                                                                                                                           | <p>Service delivery</p>                            |

|                                                                  |             |                   |                                                                                                                                                                                                                                                                                                                                                                                                                                                                                                                                                                                                                                                                                                                                                                                                                                                                                                                                                                                                                                                                                                         |                                                    |
|------------------------------------------------------------------|-------------|-------------------|---------------------------------------------------------------------------------------------------------------------------------------------------------------------------------------------------------------------------------------------------------------------------------------------------------------------------------------------------------------------------------------------------------------------------------------------------------------------------------------------------------------------------------------------------------------------------------------------------------------------------------------------------------------------------------------------------------------------------------------------------------------------------------------------------------------------------------------------------------------------------------------------------------------------------------------------------------------------------------------------------------------------------------------------------------------------------------------------------------|----------------------------------------------------|
| <p>BIOWINPHARMA Mamadou Dakouo,<br/>contact@biowinpharma.com</p> | <p>Mali</p> | <p>30/06/2019</p> | <p>BIOWIN EMR makes Electronic Medical Records (EMR) easy, accessible anytime and anywhere to healthcare professionals and patients in 16 West African countries. BIOWIN EMR is West Africa's open-source Electronic Medical Records (EMR) solution. We start with an open-source EMR software originally developed under GNU general public license and we create BIOWIN EMR Mobile Application and online platform. We deployed a tested product in June 2020 and the number of users is growing daily. We are making EMR easy and accessible anywhere and anytime to healthcare professionals and in 16 West African countries. Its functionality includes Electronic Medical Records, Electronic Prescription, Practice Management, Practice Integration, Medical Billing, Patient Engagement and Third Party Integration. BIOWIN EMR is West Africa's premier open-source Electronic Medical Records (EMR) solution provider. We start with an open-source EMR software originally developed under GNU general public license and we create BIOWIN EMR Mobile Application and online platform.</p> | <p>Health information system, Service delivery</p> |
|------------------------------------------------------------------|-------------|-------------------|---------------------------------------------------------------------------------------------------------------------------------------------------------------------------------------------------------------------------------------------------------------------------------------------------------------------------------------------------------------------------------------------------------------------------------------------------------------------------------------------------------------------------------------------------------------------------------------------------------------------------------------------------------------------------------------------------------------------------------------------------------------------------------------------------------------------------------------------------------------------------------------------------------------------------------------------------------------------------------------------------------------------------------------------------------------------------------------------------------|----------------------------------------------------|

|                                                                          |      |            |                                                                                                                                                                                                                                                                                                                                                                              |                           |
|--------------------------------------------------------------------------|------|------------|------------------------------------------------------------------------------------------------------------------------------------------------------------------------------------------------------------------------------------------------------------------------------------------------------------------------------------------------------------------------------|---------------------------|
| DHIS2 for COVID-19 Surveillance: Mali<br>Rebecca Potter, covid@dhis2.org | Mali | 08/05/2020 | The DHIS2 digital data package for COVID-19 is designed to accelerate case detection, situation reporting, active surveillance and response in countries. The COVID-19 digital data package includes standard metadata aligned with the WHO's technical guidance on COVID-19 surveillance and has been adapted to local country context and language in this implementation. | Health information system |
|--------------------------------------------------------------------------|------|------------|------------------------------------------------------------------------------------------------------------------------------------------------------------------------------------------------------------------------------------------------------------------------------------------------------------------------------------------------------------------------------|---------------------------|

|                                                                                                           |                   |                   |                                                                                                                                                                                                                                                                                                                                                                                                                                                                                                                                                                                                                                                                                                                                                                                                                                                                                                                                                                                                                                                                                                                                                                                                                                                                                        |                                                    |
|-----------------------------------------------------------------------------------------------------------|-------------------|-------------------|----------------------------------------------------------------------------------------------------------------------------------------------------------------------------------------------------------------------------------------------------------------------------------------------------------------------------------------------------------------------------------------------------------------------------------------------------------------------------------------------------------------------------------------------------------------------------------------------------------------------------------------------------------------------------------------------------------------------------------------------------------------------------------------------------------------------------------------------------------------------------------------------------------------------------------------------------------------------------------------------------------------------------------------------------------------------------------------------------------------------------------------------------------------------------------------------------------------------------------------------------------------------------------------|----------------------------------------------------|
| <p>Access to Infant and Maternal (AIM) Health Plus Mauritania Zeine Abidine Ba, zeine_abidine@wvi.org</p> | <p>Mauritania</p> | <p>01/01/2017</p> | <p>With the support of Irish Aid, the AIM Health Plus project addresses the leading causes of maternal and neonatal mortality and improves young child survival and nutritional status across four countries in Africa. Promoting behaviour change at the household level has been the emphasis. In Mauritania, the AIM Health Plus project has included a digital health component since 2019.</p> <p>The project provides community health workers (CHWs) with smartphones equipped with a tailored version of Dimagi's CommCare software to use during their home visits. The application supports CHWs who are using the Timed and Targeted Counselling (ttC) approach to promote positive health and nutrition behaviour change among pregnant women and mothers or caregivers of children under 2. The application provides reminders to help CHWs to visit homes at the ideal time during pregnancy, infancy and childhood. It also supports CHWs as they conduct counselling sessions, including enabling them to submit community health data in near real time. This data is then used for managing CHW efforts, planning and decision-making. To boost the acceptability of this digital health tool, local language audio clips are incorporated into the application.</p> | <p>Service delivery, Health information system</p> |
|-----------------------------------------------------------------------------------------------------------|-------------------|-------------------|----------------------------------------------------------------------------------------------------------------------------------------------------------------------------------------------------------------------------------------------------------------------------------------------------------------------------------------------------------------------------------------------------------------------------------------------------------------------------------------------------------------------------------------------------------------------------------------------------------------------------------------------------------------------------------------------------------------------------------------------------------------------------------------------------------------------------------------------------------------------------------------------------------------------------------------------------------------------------------------------------------------------------------------------------------------------------------------------------------------------------------------------------------------------------------------------------------------------------------------------------------------------------------------|----------------------------------------------------|

|                                                                                                                                            |            |            |                                                                                                                                                                                                                                                                                                                                                                                                                                                                                                                         |                                             |
|--------------------------------------------------------------------------------------------------------------------------------------------|------------|------------|-------------------------------------------------------------------------------------------------------------------------------------------------------------------------------------------------------------------------------------------------------------------------------------------------------------------------------------------------------------------------------------------------------------------------------------------------------------------------------------------------------------------------|---------------------------------------------|
| upSCALE<br>Joaquim Rebelo,<br>j.rebelo@malariaconsortium.org                                                                               | Mozambique | 01/02/2016 | The upSCALE platform consists of an interactive smart phone application that guides community health workers (CHWs) through patient registration, routine health checks, diagnosis, treatment, referral, and follow-up. The app automatically collates data for the CHWs' monthly reports, which they can submit to their supervisors from their phones. A complementary tablet-based application for supervisors enables them to improve CHWs' performance and feedback. Nationwide scale-up anticipated by 2020.      | Service delivery, Health information system |
| MNCH mobile content with nutrition focus, available in 4 languages in SMS and voice transcript format<br>Kim Viljoen,<br>kviljoen@gsma.com | Mozambique | 01/09/2013 | The GSMA, together with its global content consortium lead by CABI, developed open-source nutrition and MNCH mobile ready content for Mozambique available in Portuguese, Changana, Makwa and English. All content was produced by in-country specialists and is based on recommended MNCH and local nutrition practices. The Ministry of Health played a vital role in the development and content validation. The Content is available in the form of: topic-specific factsheets, SMSs and voice message transcripts. | Service delivery                            |



|                                                                    |                   |                   |                                                                                                                                                                                                                                                                                                                                                                                                                                                                                                                                                                                                                                                                                                                                                                                                                                                                                                                                                                                                                                                  |                                   |
|--------------------------------------------------------------------|-------------------|-------------------|--------------------------------------------------------------------------------------------------------------------------------------------------------------------------------------------------------------------------------------------------------------------------------------------------------------------------------------------------------------------------------------------------------------------------------------------------------------------------------------------------------------------------------------------------------------------------------------------------------------------------------------------------------------------------------------------------------------------------------------------------------------------------------------------------------------------------------------------------------------------------------------------------------------------------------------------------------------------------------------------------------------------------------------------------|-----------------------------------|
| <p>mAlert Safa Naraghi, safa@zenysis.com</p>                       | <p>Mozambique</p> | <p>11/03/2019</p> | <p>In March and April 2019, Cyclone Idai and Cyclone Kenneth hit Mozambique. Cyclone Idai was the largest natural disaster to hit Africa in more than 25 years, and both cyclones caused significant loss of life and property. To manage and analyze the voluminous and diverse data generated by the response, the National Institute of Health appointed Zenysis as its lead technology partner for the response.</p> <p>The platform is used to produce Daily and Weekly Epidemiological Bulletins, National Situational Reports, detailed epidemiological presentations and analytics that helped inform critical daily discussions and decisions in emergency health cluster meetings and governmental discussions. The Zenysis platform was also used to generate analytics that helped secure cholera vaccines and determine the location of cholera vaccination sites. The platform's outbreak investigation tool continues to be used to identify, respond to, and record data about individual cases that threaten public health.</p> | <p>Health information system</p>  |
| <p>eSIP-Saude Devan Manharlal,<br/>devan.manharlal@jhpiego.org</p> | <p>Mozambique</p> | <p>05/01/2015</p> | <p>eSIP-Saúde: Mozambique's novel approach for a sustainable Human resources for health information system. Over the past decade, governments and international partners have responded to calls for health workforce data with ambitious investments in human resources information systems (HRIS). However, documentation of country experiences in the use of HRIS to improve strategic planning and management has been lacking. The purpose of this case presentation is to document for the first time Mozambique's novel approach to HRIS, sharing key success factors and contributing to the scant global knowledge base on HRIS.</p>                                                                                                                                                                                                                                                                                                                                                                                                   | <p>Human resources for health</p> |

|                                                             |            |            |                                                                                                                                                                                                                                                                                                                                                                                                                                                                                                                                                                                                                                                                                                                                                                                                                                                                                                                                                                                                                                                 |                                                                |
|-------------------------------------------------------------|------------|------------|-------------------------------------------------------------------------------------------------------------------------------------------------------------------------------------------------------------------------------------------------------------------------------------------------------------------------------------------------------------------------------------------------------------------------------------------------------------------------------------------------------------------------------------------------------------------------------------------------------------------------------------------------------------------------------------------------------------------------------------------------------------------------------------------------------------------------------------------------------------------------------------------------------------------------------------------------------------------------------------------------------------------------------------------------|----------------------------------------------------------------|
| SIFIn<br>Júlio Tualufo,<br>julio.tualufo@jhpiego.org        | Mozambique | 01/02/2011 | Mozambique faces a chronic shortage of trained health personnel. One strategy used to increase the output of training institutions(HTI) has been the direct management of training by the MOH. The MOH has established a network of 18 HTI. These institutions provide middle-level (equivalent to 12 years of schooling) specialty training in the areas of general and maternal and child health nursing, pharmacy, clinical laboratory, ophthalmology, orthopedics and physiotherapy, nutrition, general medicine, Psychiatry, instrumentation, preventive medicine and others. Over the years, a need was felt concerning access and quality of information on training outputs and efficiency. A decision was made by the MOH to develop and implement an information system to serve two purposes: as an academic registrar, to guide and organize student and faculty management at the local level of each training institution. The information system was called as SIFIn (Standing for Sistema de Informação para Formação Inicial). | Human resources for health                                     |
| OpenLMIS Mozambique (SELV) Rebecca Alban, Info@openlmis.org | Mozambique | 01/01/2014 | In Mozambique, the customized implementation of OpenLMIS for vaccine management is called Sistema Electrónico de Logística de Vacinas (SELV). By the end of 2014, SELV had been deployed to four provinces on desktop, laptop, and mobile devices, serving over 400 health centers and their combined 10 million patients. In 2016, an extended deployment to make SELV available to all regions began with a completion date in early 2017. Next phases of the SELV program include full integration with its medical commodity supply chain counterpart, SIGLUS.                                                                                                                                                                                                                                                                                                                                                                                                                                                                              | Access to medicines, vaccines and technology, Service delivery |

|                                                                      |                   |                   |                                                                                                                                                                                                                                                                                                                                                                                                                                                                                                                                                                                                                                                                                                                                                                                                                                                                                                                                                                                                                                                             |                                                                       |
|----------------------------------------------------------------------|-------------------|-------------------|-------------------------------------------------------------------------------------------------------------------------------------------------------------------------------------------------------------------------------------------------------------------------------------------------------------------------------------------------------------------------------------------------------------------------------------------------------------------------------------------------------------------------------------------------------------------------------------------------------------------------------------------------------------------------------------------------------------------------------------------------------------------------------------------------------------------------------------------------------------------------------------------------------------------------------------------------------------------------------------------------------------------------------------------------------------|-----------------------------------------------------------------------|
| <p>OpenLMIS Mozambique (SIGLUS) Rebecca Alban, Info@openlmis.org</p> | <p>Mozambique</p> | <p>01/01/2015</p> | <p>Through an agile development approach, this project expanded on the open-source OpenLMIS platform to include an Android application that captures key workflows at the health facility level including stock management, automated requisition orders, and alert algorithms for stock levels and expiries. The iterative development process engaged MoH stakeholders to ensure the system was built upon the correct business logic used in the Mozambican supply chain. Stakeholder use cases also informed the development of a web portal where real-time visibility over facility-level data is available for reporting, visualization, and analysis. A multi-center field pilot provided an opportunity to refine and improve the product based on user acceptance testing. Over two years of development, piloting, and evaluation, the mobile application and web portal were approved for national scale-up in Mozambique. Next phases of the SIGLUS program include full integration with its immunization supply chain counterpart, SELV.</p> | <p>Access to medicines, vaccines and technology, Service delivery</p> |
| <p>PharmaDexMZ Kim Hoppenworth, khoppenworth@mtapsprogram.org</p>    | <p>Mozambique</p> | <p>01/01/2016</p> | <p>Pharmadex is supporting Medicines Registration workflows to issue marketing authorizations for pharmaceutical products.</p>                                                                                                                                                                                                                                                                                                                                                                                                                                                                                                                                                                                                                                                                                                                                                                                                                                                                                                                              | <p>Access to medicines, vaccines and technology</p>                   |

|                                                                                            |                   |                   |                                                                                                                                                                                                                                                                                                                                                                                                                                                                                                                                                                                                                                                                                                                                                                                                                                                                                                                                                                                                                                                                                          |                                  |
|--------------------------------------------------------------------------------------------|-------------------|-------------------|------------------------------------------------------------------------------------------------------------------------------------------------------------------------------------------------------------------------------------------------------------------------------------------------------------------------------------------------------------------------------------------------------------------------------------------------------------------------------------------------------------------------------------------------------------------------------------------------------------------------------------------------------------------------------------------------------------------------------------------------------------------------------------------------------------------------------------------------------------------------------------------------------------------------------------------------------------------------------------------------------------------------------------------------------------------------------------------|----------------------------------|
| <p>PENSA Valter Cumbi,<br/>vcumbi@sourcecode.solutions</p>                                 | <p>Mozambique</p> | <p>30/11/2017</p> | <p>Our solution consists of a multi-channel and bi-directional mHealth platform available to all operators by dialing *660# and online at www.pensa.org.mz. It is free for use and was designed to avail pertinent health information to all in Mozambique, particularly those in the rural areas and with low-tech phones. It provides access to:</p> <ul style="list-style-type: none"> <li>- information on symptoms, causes, and preventive measures for infectious and non-infectious diseases;</li> <li>- contact details for all the public health facilities throughout the country;</li> <li>- maternal &amp; child health information (such as the national vaccination schedule, what to expect during pregnancy, how the baby should develop in the first year, etc);</li> <li>- a means of submitting suggestions/questions to the Ministry of Health(MOH) and more;</li> </ul> <p>We also updated our platform with relevant information about Covid-19, such as causes, preventive measures, quarantine, masks, social distancing, and important contact information.</p> | <p>Service delivery</p>          |
| <p>DHIS2 for COVID-19 Surveillance:<br/>Mozambique Rebecca Potter,<br/>covid@dhis2.org</p> | <p>Mozambique</p> | <p>08/05/2020</p> | <p>The DHIS2 digital data package for COVID-19 is designed to accelerate case detection, situation reporting, active surveillance and response in countries. The COVID-19 digital data package includes standard metadata aligned with the WHO's technical guidance on COVID-19 surveillance and has been adapted to local country context and language in this implementation.</p>                                                                                                                                                                                                                                                                                                                                                                                                                                                                                                                                                                                                                                                                                                      | <p>Health information system</p> |

|                                                                                            |            |            |                                                                                                                                                                                                                                                                                                                                                                                                                                                                                                                                                                                                           |                                                      |
|--------------------------------------------------------------------------------------------|------------|------------|-----------------------------------------------------------------------------------------------------------------------------------------------------------------------------------------------------------------------------------------------------------------------------------------------------------------------------------------------------------------------------------------------------------------------------------------------------------------------------------------------------------------------------------------------------------------------------------------------------------|------------------------------------------------------|
| Community Scorecard App_Mozambique<br>Robert Worthington, rob@kwantu.net                   | Mozambique | 08/03/2022 | Community Scorecards are a widely used tool to build a trusted and constructive relationship between communities and health facility staff. The Digital Community Scorecard App helps staff or volunteers running community scorecards to digitize and analyze the data generated from this process. It is comprised of three related tools. A simplified data entry app that is designed to work offline. A programme management app that includes real-time analysis tools and a data hub, that is able to aggregate and visualize data from multiple organizations on a private or public data portal. | Leadership and governance, Health information system |
| Namibia Master Facility List Maria Helao,<br>Maria.Helao@mhss.gov.na                       | Namibia    | 01/01/2017 | The Namibia Master Facility List was developed to serve as a central pillar of the Ministry of Health and Social Services Health Information Architecture, standing as a central resource providing information on all public and private health facilities. The system provide geo-coordinates as well as service availability, staffing and infrastructure levels and has a full API to connect with other relevant systems in country.                                                                                                                                                                 | Service delivery                                     |
| Namibia Planned Parenthood Association (NAPPA) Erin Sullivan,<br>erin.sullivan@jhpiego.org | Namibia    | 01/01/2018 | Digital tool used at Namibia Planned Parenthood Association clinics supporting registration and workflow of clients.                                                                                                                                                                                                                                                                                                                                                                                                                                                                                      | Service delivery, Health information system          |
| DHIS2 for COVID-19 Surveillance: Niger (in development) Rebecca Potter,<br>covid@dhis2.org | Niger      | 08/05/2020 | The DHIS2 digital data package for COVID-19 is designed to accelerate case detection, situation reporting, active surveillance and response in countries. The COVID-19 digital data package includes standard metadata aligned with the WHO's technical guidance on COVID-19 surveillance and has been adapted to local country context and language in this implementation.                                                                                                                                                                                                                              | Heealth information system                           |

|                                                                           |              |                   |                                                                                                                                                                                                                                                                                                                                                                                                                                                                                                                                                                                                                                                                                                                                                                                                                                                                                                                                                                                                                                                                                                                                                                                                                                                                                                                                                                                                                                                                                                                                                                                                                                                     |                                                    |
|---------------------------------------------------------------------------|--------------|-------------------|-----------------------------------------------------------------------------------------------------------------------------------------------------------------------------------------------------------------------------------------------------------------------------------------------------------------------------------------------------------------------------------------------------------------------------------------------------------------------------------------------------------------------------------------------------------------------------------------------------------------------------------------------------------------------------------------------------------------------------------------------------------------------------------------------------------------------------------------------------------------------------------------------------------------------------------------------------------------------------------------------------------------------------------------------------------------------------------------------------------------------------------------------------------------------------------------------------------------------------------------------------------------------------------------------------------------------------------------------------------------------------------------------------------------------------------------------------------------------------------------------------------------------------------------------------------------------------------------------------------------------------------------------------|----------------------------------------------------|
| <p>Act to Save (A2S) Ezéchiél Mahamane,<br/>ezechiél_mahamane@wvi.org</p> | <p>Niger</p> | <p>01/01/2021</p> | <p>Preventable infectious diseases such as malaria, diarrhoea and pneumonia are the leading contributors to deaths in children under 5. About a third of those deaths also occur during the perinatal and infancy periods due to conditions such as neonatal sepsis, birth asphyxia and congenital anomalies. The Act to Save (A2S) project aims to address these leading causes of mortality of children under 5 in six communes in the Dosso and Maradi regions of Niger.</p> <p>As only two out of every five births take place in local health facilities, A2S will effect change both in facilities and in communities by: promoting healthy behaviours in households through the uptake of essential family practices; bringing quality curative care to families through effective health screenings and referrals offered by community health workers (CHWs) making home visits and providing efficient and effective medical care in environments that are welcoming, sanitary and free of infection to children and families referred to health care facilities.</p> <p>This approach aligns with Niger's national public health strategy and will be achieved using the CommCare data collection platform. This approach will also leverage the comprehensive management information system properties of a bundled suite of technology tools built on the Salesforce platform, informally referred to as Sinai.</p> <p>A2S is supported by World Vision United States' Every Last One Campaign and is being implemented using a multi-stakeholder framework with government, non-governmental organisations and UN agency partners.</p> | <p>Service delivery, Health information system</p> |
|---------------------------------------------------------------------------|--------------|-------------------|-----------------------------------------------------------------------------------------------------------------------------------------------------------------------------------------------------------------------------------------------------------------------------------------------------------------------------------------------------------------------------------------------------------------------------------------------------------------------------------------------------------------------------------------------------------------------------------------------------------------------------------------------------------------------------------------------------------------------------------------------------------------------------------------------------------------------------------------------------------------------------------------------------------------------------------------------------------------------------------------------------------------------------------------------------------------------------------------------------------------------------------------------------------------------------------------------------------------------------------------------------------------------------------------------------------------------------------------------------------------------------------------------------------------------------------------------------------------------------------------------------------------------------------------------------------------------------------------------------------------------------------------------------|----------------------------------------------------|

|                                                                                                                           |        |         |            |                                                                                                                                                                                                                                                                                                                                                                                                                                                                                                                 |                                             |
|---------------------------------------------------------------------------------------------------------------------------|--------|---------|------------|-----------------------------------------------------------------------------------------------------------------------------------------------------------------------------------------------------------------------------------------------------------------------------------------------------------------------------------------------------------------------------------------------------------------------------------------------------------------------------------------------------------------|---------------------------------------------|
| HelloMAMA<br>Steve<br>steve.ollis@mcsprogram.org                                                                          | Ollis, | Nigeria | 01/10/2015 | MAMA delivers vital health messages to pregnant women and new mothers through age- and stage-based mobile messaging that validates and complements the efforts of frontline health workers. The program is locally-led, planned for scale, and complements the national health care system by aligning with health priorities, policies, and systems from the outset. MAMA aims to increase consistent antenatal care visits and facility deliveries, thereby reducing maternal and neonatal mortality rates.   | Service delivery                            |
| USAID funded - CaTSS OpenMRS Electronic Medical Record System for 19 ART Clinics Benjamin Akinmoyeje, bakinmoyeje@msh.org |        | Nigeria | 10/08/2015 | OpenMRS is an emr system that allows hospitals and health facilities to manage all patient data. In addition, it can aggregate patient data and facility management data for monitoring and decision-making. The application is installed on Linux OS • MySQL—relational database management system (RDBMS); • Apache Tomcat—servlet application; • Mozilla Firefox—web browser application, and; • Hibernate—object to relational mapping and persistence application.                                         | Health information system, Service delivery |
| WeMUNIZE<br>Steve<br>steve.ollis@mcsprogram.org                                                                           | Ollis, | Nigeria | 22/03/2017 | The WeMUNIZE system is developed to increase demand for immunization services using the voices of local influencers and SMS to remind caretakers and gatekeepers of the importance of childhood vaccinations and of upcoming appointments. The system is complemented by a mobile registration system on Android phones and a tracking system using RFID and barcodes to track children as they receive services. Caretakers are also provided a photo of their child during each visit to the health facility. | Service delivery                            |

|                                                                                                                                            |         |            |                                                                                                                                                                                                                                                                                                                                                                                                                                                                                                                      |                            |
|--------------------------------------------------------------------------------------------------------------------------------------------|---------|------------|----------------------------------------------------------------------------------------------------------------------------------------------------------------------------------------------------------------------------------------------------------------------------------------------------------------------------------------------------------------------------------------------------------------------------------------------------------------------------------------------------------------------|----------------------------|
| CarePay mobile health wallet Steve Maina, s.maina@carepay.co.ke                                                                            | Nigeria | 18/12/2018 | CarePay is a digital health payment platform that directly connects patients, payers and healthcare providers and exchanges money and data between them. In Nigeria, the platform is being utilized as a mobile solution for administration and enrollment on the Lagos State Health Scheme. It will be used to improve decision-making and transparency, reduce transaction costs, and increase access especially for poor households.                                                                              | Healthcare financing       |
| MNCH mobile content with nutrition focus, available in 5 local languages in SMS and voice transcript format Kim Viljoen, kviljoen@gsma.com | Nigeria | 01/09/2013 | The GSMA, together with its global content consortium lead by CABI, developed open-source nutrition and MNCH mobile ready content for Nigeria available in Hausa, Igbo, Pidgin, Yoruba and English. All content was produced by in-country specialists and is based on recommended MNCH and local nutrition practices. The Ministry of Health played a vital role in the development and content validation. The Content is available in the form of: topic-specific factsheets, SMSs and voice message transcripts. | Service delivery           |
| NaijaCare Dr Saidat Akanbi, saidat@every1mobile.com                                                                                        | Nigeria | 01/10/2017 | NaijaCare is a digital platform strengthening linkages between informal medicine vendors, community pharmacists and health facilities for improved primary health care in underserved communities in Nigeria.                                                                                                                                                                                                                                                                                                        | Service delivery           |
| Shugabanci Agbons Oaiya, bonkhi@gmail.com                                                                                                  | Nigeria | 30/06/2020 | Support Kaduna and Niger state to establish a coordinating and governance structure for HRH domiciled at Primary Health Care, in accordance with the Primary Health Care Under One Roof (PHCOUR) policy. During this process, which included transferring HRH governance and management as well as payroll, an HRH-IS was developed.                                                                                                                                                                                 | Human resources for health |



|                                                                                              |         |            |                                                                                                                                                                                                                                                                                                                                                                                                                                                                                                                                                                                                                                                                                                                                                                                               |                                              |
|----------------------------------------------------------------------------------------------|---------|------------|-----------------------------------------------------------------------------------------------------------------------------------------------------------------------------------------------------------------------------------------------------------------------------------------------------------------------------------------------------------------------------------------------------------------------------------------------------------------------------------------------------------------------------------------------------------------------------------------------------------------------------------------------------------------------------------------------------------------------------------------------------------------------------------------------|----------------------------------------------|
| NaijaCare Project Moshood Abdullateef,<br>moshood@every1mobile.com                           | Nigeria | 01/05/2018 | NaijaCare is a digital peer community that provides a suite of digital services for medicine vendors (PPMVs) in Nigeria. The digital tools such as e-learning, peer support, referral management, and online ordering are aimed at improving the livelihoods of PPMVs and their customers as these tools allow PPMVs to provide better Service delivery while growing their businesses. NaijaCare is implemented by Every1Mobile with support from Bill and Melinda Gates Foundation and Unilever. Through our pilot which started in May 2018, we have demonstrated that e-learning can help upskill medicine vendors in areas of record keeping, administering of rapid diagnostic tests for malaria, and taking a rights-based approach in offering family planning services to customers. | Service delivery, Human resources for health |
| Complete Health Nneka Mobisson,<br>nneka.mobisson@mymdoc.com                                 | Nigeria | 01/01/2018 | CompleteHealth is a digital health platform to support people living with chronic health needs.                                                                                                                                                                                                                                                                                                                                                                                                                                                                                                                                                                                                                                                                                               | Service delivery                             |
| DHIS2 for COVID-19 Surveillance: Nigeria (in development) Rebecca Potter,<br>covid@dhis2.org | Nigeria | 08/05/2020 | The DHIS2 digital data package for COVID-19 is designed to accelerate case detection, situation reporting, active surveillance and response in countries. The COVID-19 digital data package includes standard metadata aligned with the WHO's technical guidance on COVID-19 surveillance and has been adapted to local country context and language in this implementation.                                                                                                                                                                                                                                                                                                                                                                                                                  | Health information system                    |

|                                                                                                                |         |            |                                                                                                                                                                                                                                                                                                                                                                                                                                                                                                                                                                                                                                                                                                                                                                                                                                                                                                                                                                                   |                                             |
|----------------------------------------------------------------------------------------------------------------|---------|------------|-----------------------------------------------------------------------------------------------------------------------------------------------------------------------------------------------------------------------------------------------------------------------------------------------------------------------------------------------------------------------------------------------------------------------------------------------------------------------------------------------------------------------------------------------------------------------------------------------------------------------------------------------------------------------------------------------------------------------------------------------------------------------------------------------------------------------------------------------------------------------------------------------------------------------------------------------------------------------------------|---------------------------------------------|
| Wellvis Wale Adeosun, wale@wellvis.org                                                                         | Nigeria | 23/06/2020 | Wellvis is a comprehensive telehealth platform; we provide access on-demand health advice, consultations and care support in real-time offered by verified health professionals. Wellvis is an on-demand health information and service platform. We provide a technology platform that connects individuals with verified and licensed health practitioners in real-time for the purpose of offering health care advisory services as well as appointment bookings and other allied services. We offer a premium option for telemedicine services (direct one-on-one online consultation with verified health workers), appointment booking (plus reminders) for physical consultation with specialists and/or for lab investigations and a portal to access curated health services and products at a discount. We also offer online health support groups + disease management tools for individuals (and/or their caregivers) with chronic illnesses on a subscription model. | Service delivery                            |
| SwissTPH x OpenFn: Automated, real-time data integration & disease monitoring Aleksa Krolls, aleksa@openfn.org | Nigeria | 01/07/2019 | SwissTPH had no way to monitor the diagnoses and treatments of sick children in Nigeria in real-time. To analyze disease patterns across health facilities, SwissTPH researchers would have to wait days until staff members exported, cleaned, and uploaded the diagnoses data collected to DHIS2—a time-consuming data process, prone to human error. Through data integration, OpenFn eliminates time lags, saving SwissTPH money and time and sending critical patient information where and when it is needed, faster. By integrating a CommCare mobile data collection app with a national DHIS2 reporting system for the ALMANACH health initiative, OpenFn has provided SwissTPH with an automated, real-time connection that enables live disease monitoring.                                                                                                                                                                                                            | Health information system, Service delivery |

|                                                                                                         |                |                   |                                                                                                                                                                                                                                                                                                                                                                                                                                                                                                                                                                                                                                                                                                                                                                                                                                                                                                                                                                                                                                                                                                                                                                                                                                                                                                                                                                                                                                                                                                                                                                                                                                                                                                                                                                                                                                                                  |                         |
|---------------------------------------------------------------------------------------------------------|----------------|-------------------|------------------------------------------------------------------------------------------------------------------------------------------------------------------------------------------------------------------------------------------------------------------------------------------------------------------------------------------------------------------------------------------------------------------------------------------------------------------------------------------------------------------------------------------------------------------------------------------------------------------------------------------------------------------------------------------------------------------------------------------------------------------------------------------------------------------------------------------------------------------------------------------------------------------------------------------------------------------------------------------------------------------------------------------------------------------------------------------------------------------------------------------------------------------------------------------------------------------------------------------------------------------------------------------------------------------------------------------------------------------------------------------------------------------------------------------------------------------------------------------------------------------------------------------------------------------------------------------------------------------------------------------------------------------------------------------------------------------------------------------------------------------------------------------------------------------------------------------------------------------|-------------------------|
| <p>Audio Job Aids for Family Planning Providers<br/> Emily Mangone,<br/> emily_mangone@abtassoc.com</p> | <p>Nigeria</p> | <p>01/01/2019</p> | <p>Through user-centered problem-specification and solution design workshops with family planning (FP) providers in Nigeria, the USAID-funded Sustaining Health Outcomes through the Private Sector (SHOPS) Plus project developed on-demand audio job aids that FP providers could call at any time to select and listen to key technical messages on FP topics of interest. This approach was selected because it met the task-shifting needs of community health extension workers (CHEWs) who could access this information using basic phones— since many did not have smartphones or wifi. Further, the on-demand approach was selected because it was sustainable beyond the duration of the SHOPS Plus project. To implement this intervention, SHOPS Plus partnered with Viamo to leverage the existing 3-2-1 platform with the Airtel network operator. Viamo is a social enterprise that specializes in using IVR, short message service (SMS), Random Digit Dialing, and unstructured supplementary services data (USSD) to support partners with behavior change communications and evidence-gathering via simple mobile phones. The 3-2-1 platform is accessible for free to anyone in Nigeria with an Airtel SIM card and it already offered on-demand voice recordings on health topics, including general FP, for beneficiaries. All informational content on the platform is developed in partnership with local experts, development organizations and appropriate government agencies. In Nigeria, on average, the health messages are accessed 35,000 times each month. SHOPS Plus developed and validated FP curriculum-based content with FP providers and posted 38 key messages, which providers can listen to for free by navigating through an interactive menu. The menu topics for FP providers include: counseling, general FP</p> | <p>Service delivery</p> |
|---------------------------------------------------------------------------------------------------------|----------------|-------------------|------------------------------------------------------------------------------------------------------------------------------------------------------------------------------------------------------------------------------------------------------------------------------------------------------------------------------------------------------------------------------------------------------------------------------------------------------------------------------------------------------------------------------------------------------------------------------------------------------------------------------------------------------------------------------------------------------------------------------------------------------------------------------------------------------------------------------------------------------------------------------------------------------------------------------------------------------------------------------------------------------------------------------------------------------------------------------------------------------------------------------------------------------------------------------------------------------------------------------------------------------------------------------------------------------------------------------------------------------------------------------------------------------------------------------------------------------------------------------------------------------------------------------------------------------------------------------------------------------------------------------------------------------------------------------------------------------------------------------------------------------------------------------------------------------------------------------------------------------------------|-------------------------|

|  |  |  |                                                                                                                                                                                                     |  |
|--|--|--|-----------------------------------------------------------------------------------------------------------------------------------------------------------------------------------------------------|--|
|  |  |  | <p>information, safety and documentation, short-acting methods, long-acting methods, and pelvic exam. Only approved clinical providers who were given an access code could access this content.</p> |  |
|--|--|--|-----------------------------------------------------------------------------------------------------------------------------------------------------------------------------------------------------|--|

|                                                             |                |                   |                                                                                                                                                                                                                                                                                                                                                                                                                                   |                           |
|-------------------------------------------------------------|----------------|-------------------|-----------------------------------------------------------------------------------------------------------------------------------------------------------------------------------------------------------------------------------------------------------------------------------------------------------------------------------------------------------------------------------------------------------------------------------|---------------------------|
| <p>Lafya HealthShare Nanlir Kapnan,<br/>kapnan@lafya.co</p> | <p>Nigeria</p> | <p>02/11/2021</p> | <p>We are building a healthcare wallet that enables friends, families and companies to save money and split the cost of their medical expenses with each other. Our product connects the unbanked population in the rural areas to the banked population in the urban areas through their relationships and enables them to save money in a mobile wallet and access healthcare financing when they have a medical emergency.</p> | <p>Healthcare finance</p> |
|-------------------------------------------------------------|----------------|-------------------|-----------------------------------------------------------------------------------------------------------------------------------------------------------------------------------------------------------------------------------------------------------------------------------------------------------------------------------------------------------------------------------------------------------------------------------|---------------------------|

|                                                             |                |                   |                                                                                                                                                                                                                                                                                                                                                                                                                                                                                                                                                                                                                                                                                                                                                                                                                                                                                                                                                                                                                                                                                                                                                                                                                                                                                                                                                                                                                                         |                                                     |
|-------------------------------------------------------------|----------------|-------------------|-----------------------------------------------------------------------------------------------------------------------------------------------------------------------------------------------------------------------------------------------------------------------------------------------------------------------------------------------------------------------------------------------------------------------------------------------------------------------------------------------------------------------------------------------------------------------------------------------------------------------------------------------------------------------------------------------------------------------------------------------------------------------------------------------------------------------------------------------------------------------------------------------------------------------------------------------------------------------------------------------------------------------------------------------------------------------------------------------------------------------------------------------------------------------------------------------------------------------------------------------------------------------------------------------------------------------------------------------------------------------------------------------------------------------------------------|-----------------------------------------------------|
| <p>HelpMum Dr Abiodun Adereni,<br/>abbey2real@gmail.com</p> | <p>Nigeria</p> | <p>01/01/2017</p> | <p>HelpMum's Mission is to reduce maternal and infant mortality in Nigeria. Our overall strategy and service to underserved communities has now been fully tested and adapted to the Covid pandemic and we are combining practical and digital approaches:<br/>         HelpMum is addressing immediate &amp; critical needs "on site" by providing basic, inexpensive HelpMum birth kits containing essential supplies required at childbirth to ensure a safe and hygienic delivery, fully involving the traditional birth attendants who playing a key role in these remote communities. As a note of context, 2/3 births in Nigeria still occur at home, with only 1/3 are attended by doctors or midwives.<br/>         HelpMum also addresses the underlying lack of access to information &amp; education to traditional birth attendants, via digital tutorials available on the HelpMum E-learning Platform providing TBAs short video tutorial on general clean and safe delivery practices in their own indigenous language. We recorded WHO midwifery tutorials in Nigerian indigenous languages to help disseminate best practices whether or not Wi-Fi is available. We fully leverage mobile &amp; digital technologies to enhance our capacity to service more women in remote communities. We developed a proprietary IT telecom application, the HelpMum Vaccination Tracker which can be uploaded on any telecom</p> | <p>Service delivery, Human resources for health</p> |
|-------------------------------------------------------------|----------------|-------------------|-----------------------------------------------------------------------------------------------------------------------------------------------------------------------------------------------------------------------------------------------------------------------------------------------------------------------------------------------------------------------------------------------------------------------------------------------------------------------------------------------------------------------------------------------------------------------------------------------------------------------------------------------------------------------------------------------------------------------------------------------------------------------------------------------------------------------------------------------------------------------------------------------------------------------------------------------------------------------------------------------------------------------------------------------------------------------------------------------------------------------------------------------------------------------------------------------------------------------------------------------------------------------------------------------------------------------------------------------------------------------------------------------------------------------------------------|-----------------------------------------------------|

|  |  |  |                                                                                                                                                                                                                                                           |  |
|--|--|--|-----------------------------------------------------------------------------------------------------------------------------------------------------------------------------------------------------------------------------------------------------------|--|
|  |  |  | <p>device, to help increase immunization awareness and immunization rates in remote rural area in Nigeria. We are currently in improving our vaccination tracking system with new Ai innovation in partnership with Google and Vanderbilt University.</p> |  |
|--|--|--|-----------------------------------------------------------------------------------------------------------------------------------------------------------------------------------------------------------------------------------------------------------|--|

|                                                                                                                                                          |                |                   |                                                                                                                                                                                                                                                                                                                                                                                                                                                                                                                                                                                                                                                                                                                                                                                                                                                                                                                                                                                                                                                                                                                                                                                                                                                                                                                                                                                                                                                                                                                                                                                                                                                                                                                                             |                                                                     |
|----------------------------------------------------------------------------------------------------------------------------------------------------------|----------------|-------------------|---------------------------------------------------------------------------------------------------------------------------------------------------------------------------------------------------------------------------------------------------------------------------------------------------------------------------------------------------------------------------------------------------------------------------------------------------------------------------------------------------------------------------------------------------------------------------------------------------------------------------------------------------------------------------------------------------------------------------------------------------------------------------------------------------------------------------------------------------------------------------------------------------------------------------------------------------------------------------------------------------------------------------------------------------------------------------------------------------------------------------------------------------------------------------------------------------------------------------------------------------------------------------------------------------------------------------------------------------------------------------------------------------------------------------------------------------------------------------------------------------------------------------------------------------------------------------------------------------------------------------------------------------------------------------------------------------------------------------------------------|---------------------------------------------------------------------|
| <p>Real-Time Monitoring of Moderna Vaccines in collaboration with National Primary Health Care Development Agency. Oghenetega Iortim, tega@gricd.com</p> | <p>Nigeria</p> | <p>16/08/2021</p> | <p>Nigeria, Africa's most populous country, requires a more technical approach, structure, and infrastructure to support the effective distribution of vaccines to millions of Nigerians in both rural and urban regions in a short amount of time. In August 2021, Nigeria received a donation of 4.2 million doses of Moderna vaccines from the US Government. However, unlike Astrazeneca vaccines that need to be transported at 2-8 degrees, the Moderna vaccines are stored at a much lower temperature. Although upon arrival, the vaccines were frozen within the appropriate temperature range of -50°C and -15°C, the Moderna vaccines are to be stored at -15°C to -25°C degrees.</p> <p>To mitigate waste and ensure optimal potency of the vaccines, the National Primary Health Care Development Agency, a parastatal of Nigeria's Federal Ministry of Health, engaged the services of Gricd Integrated Services by using our MOTE device, a Multi-Purpose Real-time Data Logger, and enterprise software for monitoring the temperatures of the vaccines while in storage and transit.</p> <p>With 36 states and a landmass of 923,768km<sup>2</sup> to cover, NPHCDA, the Nigerian government arm tasked with the responsibility of getting these vaccines to the last mile, has her work cut out. This includes ensuring the vaccines get to each state in the best condition and being able to attest to the potency of the vaccines, both of which Gricd device and software guarantee.</p> <p>Gricd MOTE is placed in all containers transporting the Moderna to generate information such as the temperature and location of the vaccine remotely. If the vaccines deviate from their intended route or exceed the</p> | <p>Service delivery, Access to medicine, vaccine and Technology</p> |
|----------------------------------------------------------------------------------------------------------------------------------------------------------|----------------|-------------------|---------------------------------------------------------------------------------------------------------------------------------------------------------------------------------------------------------------------------------------------------------------------------------------------------------------------------------------------------------------------------------------------------------------------------------------------------------------------------------------------------------------------------------------------------------------------------------------------------------------------------------------------------------------------------------------------------------------------------------------------------------------------------------------------------------------------------------------------------------------------------------------------------------------------------------------------------------------------------------------------------------------------------------------------------------------------------------------------------------------------------------------------------------------------------------------------------------------------------------------------------------------------------------------------------------------------------------------------------------------------------------------------------------------------------------------------------------------------------------------------------------------------------------------------------------------------------------------------------------------------------------------------------------------------------------------------------------------------------------------------|---------------------------------------------------------------------|



|                                                         |         |            |                                                                                                                                                                                                                                                                                                                                                                                                                                                                                                                                                                                                                                                                                                                                                                                                                                                                                                                |                                         |
|---------------------------------------------------------|---------|------------|----------------------------------------------------------------------------------------------------------------------------------------------------------------------------------------------------------------------------------------------------------------------------------------------------------------------------------------------------------------------------------------------------------------------------------------------------------------------------------------------------------------------------------------------------------------------------------------------------------------------------------------------------------------------------------------------------------------------------------------------------------------------------------------------------------------------------------------------------------------------------------------------------------------|-----------------------------------------|
|                                                         |         |            | <p>temperature range, alerts are sent to the appropriate parties which helps them to ensure the vaccines maintain their potency and prevent vaccine wastage. Temperature excursions for all 4.2 million doses of Moderna Vaccines can be easily checked because the temperature of these vaccines are provided on the Grid's Enterprise Software.</p> <p>The National Primary Health Care Development Agency on the 13th of September, 2021 disclosed that a total of 1,407,736 people have received their first dose of the Moderna Vaccine and hitherto, no cases of ineffectiveness of the Vaccines has been recorded, this means that the agency has been able to properly monitor the vaccines while in storage and transit using the Grid Mote and Enterprise software to ensure the effectiveness of the vaccines.</p> <p>The goal is to save lives, reduce waste, and increase access to vaccines.</p> |                                         |
| ulerawa luke shors, lshors@icloud.com                   | Nigeria | 31/08/2021 | Currently a pilot project of a new claims system in primary health facilities in the Ekiti state.                                                                                                                                                                                                                                                                                                                                                                                                                                                                                                                                                                                                                                                                                                                                                                                                              | Service delivery,<br>Healthcare finance |
| Quick Health Chris Agape Ajah, hello@getquickhealth.com | Nigeria | 01/07/2021 | Quick health helps aggregate various health service providers on one platform for easier health access                                                                                                                                                                                                                                                                                                                                                                                                                                                                                                                                                                                                                                                                                                                                                                                                         | Service delivery                        |

|                                                           |                |                   |                                                                                                                                                                                                                                                                                                                                                                                                                                                                                                                                                                                                                                                                                                                                                                                                                                                                                                                                                                                                                                                                                                                                                                                                                                                                                                                                                                                                                                                                                                                                                                                                                                                                                                                            |                                                                     |
|-----------------------------------------------------------|----------------|-------------------|----------------------------------------------------------------------------------------------------------------------------------------------------------------------------------------------------------------------------------------------------------------------------------------------------------------------------------------------------------------------------------------------------------------------------------------------------------------------------------------------------------------------------------------------------------------------------------------------------------------------------------------------------------------------------------------------------------------------------------------------------------------------------------------------------------------------------------------------------------------------------------------------------------------------------------------------------------------------------------------------------------------------------------------------------------------------------------------------------------------------------------------------------------------------------------------------------------------------------------------------------------------------------------------------------------------------------------------------------------------------------------------------------------------------------------------------------------------------------------------------------------------------------------------------------------------------------------------------------------------------------------------------------------------------------------------------------------------------------|---------------------------------------------------------------------|
| <p>PHARMARUN IBITAYO TAIWO,<br/>tayotaiwo83@yahoo.com</p> | <p>Nigeria</p> | <p>21/11/2021</p> | <p>PHARMARUN is an open source, mobile and web-based application that will allow users order for non-prescription drugs, request for vaccines, make payments and get delivery with minimum time where applicable. PHARMARUN also intends to track drug usage and compliance, vaccine distribution and usage using Artificial Intelligence algorithms. PHARMARUN will also be scaled further to respond to emergencies. Users will also have a wallet funded through multiple channels – Banks, crypto, USSD etc – where instant purchases can be made. Users will also earn based on referrals and active usage.</p> <p>DESIGN PRINCIPLES</p> <p>PHARMARUN when launched, will be a new paradigm from the conventional method of gaining access to drugs. We predict in a few years, PHARMARUN will become a seamless channel for dispensing drugs. Our design principle will address;</p> <ol style="list-style-type: none"> <li>1. Open-Source Technology usage</li> <li>2. Integrate with Third-party applications and databases e.g., Payment gateways, delivery services, GPS Services.</li> <li>3. Multi factor authentication to secure users from attacks or compromise</li> <li>4. Age verification and prevention of multiple user profile</li> <li>5. Provisioning service for Rural areas with little access to internet using USSD services.</li> <li>6. Scalability in terms of needs and population demography</li> <li>7. All deployed technology is of global standards</li> <li>8. Sustainable and affordable business model to keep the business growing while providing affordable service</li> <li>9. Support multiple repository systems</li> <li>10. Ensure recruitment of skilled Human</li> </ol> | <p>Service delivery, Access to medicine, vaccine and Technology</p> |
|-----------------------------------------------------------|----------------|-------------------|----------------------------------------------------------------------------------------------------------------------------------------------------------------------------------------------------------------------------------------------------------------------------------------------------------------------------------------------------------------------------------------------------------------------------------------------------------------------------------------------------------------------------------------------------------------------------------------------------------------------------------------------------------------------------------------------------------------------------------------------------------------------------------------------------------------------------------------------------------------------------------------------------------------------------------------------------------------------------------------------------------------------------------------------------------------------------------------------------------------------------------------------------------------------------------------------------------------------------------------------------------------------------------------------------------------------------------------------------------------------------------------------------------------------------------------------------------------------------------------------------------------------------------------------------------------------------------------------------------------------------------------------------------------------------------------------------------------------------|---------------------------------------------------------------------|

|  |  |  |                                                                                                                                                                                                                                                                                                                                                                                                                                                                                                                                                                                                                                                                                                                                                                                                                                                                                                                                                                                                                                                                                                                                                                                                                                                                                                                                                                                                                                                                                                  |  |
|--|--|--|--------------------------------------------------------------------------------------------------------------------------------------------------------------------------------------------------------------------------------------------------------------------------------------------------------------------------------------------------------------------------------------------------------------------------------------------------------------------------------------------------------------------------------------------------------------------------------------------------------------------------------------------------------------------------------------------------------------------------------------------------------------------------------------------------------------------------------------------------------------------------------------------------------------------------------------------------------------------------------------------------------------------------------------------------------------------------------------------------------------------------------------------------------------------------------------------------------------------------------------------------------------------------------------------------------------------------------------------------------------------------------------------------------------------------------------------------------------------------------------------------|--|
|  |  |  | <p>Resources to mitigate any downtime</p> <p><b>SOLUTION</b></p> <p>PHARMARUN main objectives is to provide an electronic platform to order for non-prescription drugs, request for vaccines and track usage. In order to achieve this, PHARMARUN will need to cover the following modules;</p> <ol style="list-style-type: none"><li>1. Identity - Each user must create a profile, or link with google account or Facebook. This will help prevent one user having more than one account</li><li>2. Search inventory - select services required, either drugs or vaccine, then specify type</li><li>3. Determine dosage by probing a few questions – input few parameters such as age, history etc</li><li>4. Locate nearest Pharmacy or vaccine center - GPS service will locate a pharmacy nearest to user and dispatch request immediately</li><li>5. Fund wallets and make instant payment - Fund wallets through multiple channels so orders can be charged directly from users' wallet. This makes processing faster.</li><li>6. Fast Delivery system – dispatch rider is immediately deployed to make delivery within the shortest possible time, users can monitor dispatch through GPS tracking services.</li><li>7. Usage Monitor - Upon delivery, system monitors drug usage through AI algorithms to ensure drugs are taken as at when due and right dosage is taken.</li><li>8. Supplementary USSD service for Rural areas with poor internet access and smart devices.</li></ol> |  |
|--|--|--|--------------------------------------------------------------------------------------------------------------------------------------------------------------------------------------------------------------------------------------------------------------------------------------------------------------------------------------------------------------------------------------------------------------------------------------------------------------------------------------------------------------------------------------------------------------------------------------------------------------------------------------------------------------------------------------------------------------------------------------------------------------------------------------------------------------------------------------------------------------------------------------------------------------------------------------------------------------------------------------------------------------------------------------------------------------------------------------------------------------------------------------------------------------------------------------------------------------------------------------------------------------------------------------------------------------------------------------------------------------------------------------------------------------------------------------------------------------------------------------------------|--|

|                                                                                                         |         |            |  |                                                |
|---------------------------------------------------------------------------------------------------------|---------|------------|--|------------------------------------------------|
| EmHealth-Paediatric Digital Health Initiative<br>Dr Agbarakwe Chukwuemeka,<br>brammy@emhealthglobal.org | Nigeria | 01/01/2021 |  | Health information<br>system, Service delivery |
|---------------------------------------------------------------------------------------------------------|---------|------------|--|------------------------------------------------|

|                                                          |                |                   |                                                                                                                                                                                                                                                                                                                                                                                                                                                                                                                                                                                                                                                                                                                                                                                                                                                                                                                                                                                                                                                                                                                                                                                                                                                                                                                                                                                                                                                                                   |                         |
|----------------------------------------------------------|----------------|-------------------|-----------------------------------------------------------------------------------------------------------------------------------------------------------------------------------------------------------------------------------------------------------------------------------------------------------------------------------------------------------------------------------------------------------------------------------------------------------------------------------------------------------------------------------------------------------------------------------------------------------------------------------------------------------------------------------------------------------------------------------------------------------------------------------------------------------------------------------------------------------------------------------------------------------------------------------------------------------------------------------------------------------------------------------------------------------------------------------------------------------------------------------------------------------------------------------------------------------------------------------------------------------------------------------------------------------------------------------------------------------------------------------------------------------------------------------------------------------------------------------|-------------------------|
| <p>OneCare Hafeez Ayanda,<br/>hayanda@innovastra.com</p> | <p>Nigeria</p> | <p>01/01/2020</p> | <p>OneCare is an eHealth solution that offers an interconnected healthcare system. OneCare is a cloud-based SaaS Electronic Health Records (EHR) fully integrated with Practice Management, Telemedicine, Mobile App, Healthcare Analytics, Pharmacy Information System, Laboratory &amp; Radiology Information System, Document Management, Maternity Care solution, and Billing.</p> <p>OneCare enables healthcare providers deliver better, more consistent, coordinated and efficient healthcare. It improves access to health services in remote and under-served communities and empower individuals to manage their own health more proactively and effectively. It offers Health Information Exchange which provide seamless exchange of patient information among healthcare providers.</p> <p>OneCare offer patients the opportunity to have their health records move with them at different point of care. Patients are able to access their own health record in the way they choose, and also decide who is able to access it. Clinicians and other caregivers – including doctors, nurses, carers, and social services workers – will be able to access all relevant patient information when they need to, when they see the patient, with the patient’s consent. It offers improved data collection providing public healthcare the opportunity to proactively monitor health indicators such as infectious disease prevalence, maternal and child outcomes.</p> | <p>Service delivery</p> |
|----------------------------------------------------------|----------------|-------------------|-----------------------------------------------------------------------------------------------------------------------------------------------------------------------------------------------------------------------------------------------------------------------------------------------------------------------------------------------------------------------------------------------------------------------------------------------------------------------------------------------------------------------------------------------------------------------------------------------------------------------------------------------------------------------------------------------------------------------------------------------------------------------------------------------------------------------------------------------------------------------------------------------------------------------------------------------------------------------------------------------------------------------------------------------------------------------------------------------------------------------------------------------------------------------------------------------------------------------------------------------------------------------------------------------------------------------------------------------------------------------------------------------------------------------------------------------------------------------------------|-------------------------|

|                                                                                      |               |                   |                                                                                                                                                                                                                                                                                                                                                                                                                                                                                                                                                                                                                                                                                                                                                                                                                                                                                                                                                                                                                                                                                                                                                                                                                                                                                                                                                                                                                                                                                                                                                |                         |
|--------------------------------------------------------------------------------------|---------------|-------------------|------------------------------------------------------------------------------------------------------------------------------------------------------------------------------------------------------------------------------------------------------------------------------------------------------------------------------------------------------------------------------------------------------------------------------------------------------------------------------------------------------------------------------------------------------------------------------------------------------------------------------------------------------------------------------------------------------------------------------------------------------------------------------------------------------------------------------------------------------------------------------------------------------------------------------------------------------------------------------------------------------------------------------------------------------------------------------------------------------------------------------------------------------------------------------------------------------------------------------------------------------------------------------------------------------------------------------------------------------------------------------------------------------------------------------------------------------------------------------------------------------------------------------------------------|-------------------------|
| <p>E-Heza Data Solutions Wendy Leonard, MD, AAHIVS, wendy@theihanganeproject.com</p> | <p>Rwanda</p> | <p>01/01/2018</p> | <p>E-Heza is Rwanda's first point-of-care data solution was created alongside front-line health care workers and the Rwanda Ministry of Health. E-Heza will dramatically improve maternal and child health outcomes by giving nurses the tools they need to adopt evidence-based clinical care protocols, provide high quality care and utilize real-time data trends to tailor health education to individual family needs while simultaneously satisfying Rwanda Ministry of Health data reporting requirements. In response to Covid-19, E-Heza is developing an Acute Illness Assessment &amp; Management module for CHWs and nurses at health centers. This module allows CHWs to enter responses to guided screening questions. If Covid-19 is suspected, an alert immediately advises the CHW to isolate the community member and contact the health center. Care management can continue in the same patient record at the health center. If Covid-19 is not suspected, the CHW can continue with assessment and management of the relevant condition. A facility-level Covid-19 module has recently been developed and deployed that allows frontline health workers to provide symptom review and physical exam, rapid testing if indicated, and decision matrix for high and low risk confirmed cases. A contact collection tool is incorporated into the visit so health workers can document contacts. The documented contacts populate a Contacts Management module that allows health workers to follow up on all contacts.</p> | <p>Service delivery</p> |
|--------------------------------------------------------------------------------------|---------------|-------------------|------------------------------------------------------------------------------------------------------------------------------------------------------------------------------------------------------------------------------------------------------------------------------------------------------------------------------------------------------------------------------------------------------------------------------------------------------------------------------------------------------------------------------------------------------------------------------------------------------------------------------------------------------------------------------------------------------------------------------------------------------------------------------------------------------------------------------------------------------------------------------------------------------------------------------------------------------------------------------------------------------------------------------------------------------------------------------------------------------------------------------------------------------------------------------------------------------------------------------------------------------------------------------------------------------------------------------------------------------------------------------------------------------------------------------------------------------------------------------------------------------------------------------------------------|-------------------------|

|                                                                                           |               |                   |                                                                                                                                                                                                                                                                                                                                                                                                                                                                                                                                                                                                                                                                                                                                                                                                                                            |                                  |
|-------------------------------------------------------------------------------------------|---------------|-------------------|--------------------------------------------------------------------------------------------------------------------------------------------------------------------------------------------------------------------------------------------------------------------------------------------------------------------------------------------------------------------------------------------------------------------------------------------------------------------------------------------------------------------------------------------------------------------------------------------------------------------------------------------------------------------------------------------------------------------------------------------------------------------------------------------------------------------------------------------|----------------------------------|
| <p>Rwanda Health Analytics Platform (RHAP)<br/>Eliachim Ishimwe, eliachim@zenysis.com</p> | <p>Rwanda</p> | <p>13/08/2018</p> | <p>Rwanda Health Analytics Platform (RHAP) is a rapid data integration and advanced analytics platform developed with the Rwanda Biomedical Center (RBC). RHAP enables data triangulation, processing, and visualization of fragmented data. The platform resolves critical differences in datasets by harmonizing location naming, data collection cadence, indicators, names, etc). RHAP is a web application that can be accessed with web connection.</p> <p>The RHAP integrates data from the facility level Health information system, the community Health information system, the DHS, the Integrated Supervision Survey and data from an electronic LMIS to support and improve data-driven decision making. Currently the project is looking at expanding the scope by integrating additional datasets such as HIV, TB, etc.</p> | <p>Health information system</p> |
| <p>DHIS2 for COVID-19 Surveillance: Rwanda<br/>Rebecca Potter, covid@dhis2.org</p>        | <p>Rwanda</p> | <p>08/05/2020</p> | <p>The DHIS2 digital data package for COVID-19 is designed to accelerate case detection, situation reporting, active surveillance and response in countries. The COVID-19 digital data package includes standard metadata aligned with the WHO's technical guidance on COVID-19 surveillance and has been adapted to local country context and language in this implementation.</p>                                                                                                                                                                                                                                                                                                                                                                                                                                                        | <p>Health information system</p> |

|                                                                                  |               |                   |                                                                                                                                                                                                                                                                                                                                                                                                                                                                                                                                                                                                                                                                                                                                                                                                                                                                                                             |                         |
|----------------------------------------------------------------------------------|---------------|-------------------|-------------------------------------------------------------------------------------------------------------------------------------------------------------------------------------------------------------------------------------------------------------------------------------------------------------------------------------------------------------------------------------------------------------------------------------------------------------------------------------------------------------------------------------------------------------------------------------------------------------------------------------------------------------------------------------------------------------------------------------------------------------------------------------------------------------------------------------------------------------------------------------------------------------|-------------------------|
| <p>Rwandan digital ANC module Mr Felix Sayinzoga, felix.sayinzoga@rbc.gov.rw</p> | <p>Rwanda</p> | <p>24/08/2020</p> | <p>Following the adaptation of the national ANC policy and guideline, Rwanda is now embarking on efforts to test innovative ANC Service delivery approaches and mechanisms to improve the quality of antenatal care in line with the 2016 WHO recommendations. Rwanda will be adopting a person-centered digital tracking and decision support system to potentially accelerate the adoption of the new ANC recommendations and policies. This digital health system is a software global good, the WHO digital ANC module, which has been created on the OpenSRP platform. Rwandan Ministry of health will adapt and update the WHO digital ANC module to better reflect the new national ANC policies and Rwandan contexts. Implementation of these modules will take place in selected districts (Nyagatare &amp; Nyanza Districts) that will allow larger scale-up if the initiative is successful.</p> | <p>Service delivery</p> |
|----------------------------------------------------------------------------------|---------------|-------------------|-------------------------------------------------------------------------------------------------------------------------------------------------------------------------------------------------------------------------------------------------------------------------------------------------------------------------------------------------------------------------------------------------------------------------------------------------------------------------------------------------------------------------------------------------------------------------------------------------------------------------------------------------------------------------------------------------------------------------------------------------------------------------------------------------------------------------------------------------------------------------------------------------------------|-------------------------|



|                                                                                            |               |                   |                                                                                                                                                                                                                                                                                                                                                                                                                                                                                                                                                                                                                                                                                                                                                                                                                                                                                                                                                                                                                                                                       |                                  |
|--------------------------------------------------------------------------------------------|---------------|-------------------|-----------------------------------------------------------------------------------------------------------------------------------------------------------------------------------------------------------------------------------------------------------------------------------------------------------------------------------------------------------------------------------------------------------------------------------------------------------------------------------------------------------------------------------------------------------------------------------------------------------------------------------------------------------------------------------------------------------------------------------------------------------------------------------------------------------------------------------------------------------------------------------------------------------------------------------------------------------------------------------------------------------------------------------------------------------------------|----------------------------------|
| <p>Rwanda Health Information Exchange System (RHIES) Julie Vanvolsem, julie@savics.org</p> | <p>Rwanda</p> | <p>01/06/2019</p> | <p>The Rwanda Health Information moving disparate systems across to a consolidating electronic system.</p> <p>Health data is currently managed on various platforms in Rwanda; paper forms, the EMR, the RHMIS, the electronic Laboratory Information System (LIS) and other databases. The non-integration between these platforms at the facility or national levels affects data integrity and quality negatively. There was therefore a need to develop an integrated Health information system that synchronizes data entry and reporting across various health databases to reduce transcription errors, data capture errors, and reduce reporting time. The “Rwanda Health Information Exchange system” is a set of applications that work together in the Open Health Information Exchange (OpenHIE) architecture to serve point-of-service systems, like EMRs, DHIS2, National ID database and laboratory information system.</p> <p>The main feature of this project was the deployment and configuration of an interoperability layer designed to ease</p> | <p>Health information system</p> |
| <p>JoCare Jerome Nshimiyimana, njerome05@gmail.com</p>                                     | <p>Rwanda</p> | <p>21/11/2021</p> | <p>Through our Web app Platform, We help youth and parents to know or understand and discuss about sexual reproductive health information through our educative online innovative tools(girls calculator , games, blog, YouTube videos) and We have developed API (Application programming interface..) that can help other website to embed our tools like girls calculators and Web-games to their site , And Also we developed Health related WordPress plugins.</p>                                                                                                                                                                                                                                                                                                                                                                                                                                                                                                                                                                                               | <p>Service delivery</p>          |

|                                                                                                |               |                   |                                                                                                                                                                                                                                                                                                                                                                                                                                                                                                                                                                                                                                                                                                                                                                                                                                                                                                                                                                                                                                                                                                                                                                                                                                                                                                                                                                                                                                                                                                                                                                                                                                                                                                                                                                                       |                                                    |
|------------------------------------------------------------------------------------------------|---------------|-------------------|---------------------------------------------------------------------------------------------------------------------------------------------------------------------------------------------------------------------------------------------------------------------------------------------------------------------------------------------------------------------------------------------------------------------------------------------------------------------------------------------------------------------------------------------------------------------------------------------------------------------------------------------------------------------------------------------------------------------------------------------------------------------------------------------------------------------------------------------------------------------------------------------------------------------------------------------------------------------------------------------------------------------------------------------------------------------------------------------------------------------------------------------------------------------------------------------------------------------------------------------------------------------------------------------------------------------------------------------------------------------------------------------------------------------------------------------------------------------------------------------------------------------------------------------------------------------------------------------------------------------------------------------------------------------------------------------------------------------------------------------------------------------------------------|----------------------------------------------------|
| <p>Automation and AI for Health Campaign Planning Sangeeta Jobanputra, sraja@connecti3.com</p> | <p>Rwanda</p> | <p>21/11/2021</p> | <p>We provide an AI-powered, end-to-end automated health campaign micro-planning platform. Our platform is transparent, allowing multiple health campaign planners to work on it at the same time and design entire health campaigns with a few mouse clicks. Our built-in algorithms and predictive analytics take care of the rest: identifying the target population, determining which communities are most in need of services, forecasting staff and medical supply requirements, tracking financial pledges and the flow of funds to health sites, tracking campaign results and performance, and assisting with report preparation. Depending on the complexity of the health campaign, our laboratory test of the platform shows a time savings of two to five months of planning. Our pre-test of the platform's use on two previous Rwandan national health campaigns in 2018 and 2019 revealed that it only reached 26% and 21% of the poorest households, respectively. According to our current predictive analytics, Rwanda's Ministry of Health could have reached an additional 2.1 million people by adding 180 mobile sites in strategic locations. Adding a complimentary service like family planning to a child-focused health campaign increased the relative cost of the overall campaign by only 4%, reaching an additional 50,000 women, according to data analytics conducted with our solution. The system can also provide optimized resource deployment options thanks to the automation of the planning process. For example, we discovered that most people used the health campaign services within the first three days of its implementation, but that staffing was not adjusted to meet demand, resulting in long lines and supply shortages.</p> | <p>Service delivery, Leadership and governance</p> |
|------------------------------------------------------------------------------------------------|---------------|-------------------|---------------------------------------------------------------------------------------------------------------------------------------------------------------------------------------------------------------------------------------------------------------------------------------------------------------------------------------------------------------------------------------------------------------------------------------------------------------------------------------------------------------------------------------------------------------------------------------------------------------------------------------------------------------------------------------------------------------------------------------------------------------------------------------------------------------------------------------------------------------------------------------------------------------------------------------------------------------------------------------------------------------------------------------------------------------------------------------------------------------------------------------------------------------------------------------------------------------------------------------------------------------------------------------------------------------------------------------------------------------------------------------------------------------------------------------------------------------------------------------------------------------------------------------------------------------------------------------------------------------------------------------------------------------------------------------------------------------------------------------------------------------------------------------|----------------------------------------------------|

|                                                                                                                                                      |                       |            |                                                                                                                                                                                                                                                                                                                                                                                                         |                                                                |
|------------------------------------------------------------------------------------------------------------------------------------------------------|-----------------------|------------|---------------------------------------------------------------------------------------------------------------------------------------------------------------------------------------------------------------------------------------------------------------------------------------------------------------------------------------------------------------------------------------------------------|----------------------------------------------------------------|
| Suivi nutritionnel des enfants de moins de 5 ans dans la région de Lobata Eduardo, ferreirae@who.int                                                 | Sao Tome and Principe | 01/06/2019 | le projet utilise les téléphones mobiles pour suivre à distance la pesée des enfants enfin de déterminer leur état nutritionnel                                                                                                                                                                                                                                                                         | Service delivery                                               |
| DHIS2 for COVID-19 Surveillance: Sao Tome and Principe (in development) Rebecca Potter, covid@dhis2.org                                              | Sao Tome and Principe | 08/05/2020 | The DHIS2 digital data package for COVID-19 is designed to accelerate case detection, situation reporting, active surveillance and response in countries. The COVID-19 digital data package includes standard metadata aligned with the WHO's technical guidance on COVID-19 surveillance and has been adapted to local country context and language in this implementation.                            | Health information system                                      |
| Implementation of a Performance-Based Financing Data System for Senegal - using the open source tool Hesabu Dr Malick Cissé Ndiaye, illeyya@yahoo.fr | Senegal               | 04/06/2012 | Data System to Manage the performance based financing program including offline mobile data collection of quality of care and client satisfaction, the computation of program indicators, the calculation of incentive bonuses, the management of the PBF primary and subcontractor relationships and distribution of incentives. In addition, data is displayed publicly through open data dashboards. | Service delivery                                               |
| Suivi des grossesses dans la région de Kaolack Dr Dia, nourougaloya@gmail.com                                                                        | Senegal               | 14/05/2019 | suivi des grossesses des femmes à risques pour s'assurer des CPN                                                                                                                                                                                                                                                                                                                                        | Service delivery                                               |
| NTD SCH-STH prevalence survey Clara Burgert, cburgert@rti.org                                                                                        | Senegal               | 01/01/2018 | Use of Secure Data Kit platform to collect disease prevalence survey information for SCH and STH surveys                                                                                                                                                                                                                                                                                                | Health information system                                      |
| Informed Push Model - Yeksi-Naa Melanie Joiner, mjoiner@intrahealth.org                                                                              | Senegal               | 01/07/2013 | To inform a push model of supply chain management, a tablet-based logistics management information system tracks real time facility-level data for viewing at the district, regional, and national levels allowing for improved forecasting.                                                                                                                                                            | Access to medicines, vaccines and technology, Service delivery |
| Senegal immunization supply chain Neeraj Thakare, neeraj@logistimo.com                                                                               | Senegal               | 05/01/2020 | In partnership with Gavi, Logistimo's SCM platform has been deployed in 2 regions, across ~100 health facilities to improve visibility, tracking and availability of vaccines from the central level to the last-mile. The deployment                                                                                                                                                                   | Access to medicines, vaccines and technology, Service delivery |

|                                                                                                                        |              |            |                                                                                                                                                                                                                                                                                                                                                                                                                                                                                                                                                                                                                                                                                                                                                                                                                         |                           |
|------------------------------------------------------------------------------------------------------------------------|--------------|------------|-------------------------------------------------------------------------------------------------------------------------------------------------------------------------------------------------------------------------------------------------------------------------------------------------------------------------------------------------------------------------------------------------------------------------------------------------------------------------------------------------------------------------------------------------------------------------------------------------------------------------------------------------------------------------------------------------------------------------------------------------------------------------------------------------------------------------|---------------------------|
|                                                                                                                        |              |            | was localized keeping in mind the native context, including French language.                                                                                                                                                                                                                                                                                                                                                                                                                                                                                                                                                                                                                                                                                                                                            |                           |
| DHIS2 for COVID-19 Surveillance: Senegal<br>Rebecca Potter, covid@dhis2.org                                            | Senegal      | 08/05/2020 | The DHIS2 digital data package for COVID-19 is designed to accelerate case detection, situation reporting, active surveillance and response in countries. The COVID-19 digital data package includes standard metadata aligned with the WHO's technical guidance on COVID-19 surveillance and has been adapted to local country context and language in this implementation.                                                                                                                                                                                                                                                                                                                                                                                                                                            | Health information system |
| Aarleen mHealth System Gorgui Diallo,<br>gdiallo@aficare.org                                                           | Senegal      | 03/08/2020 | This 6-year MCH project funded by Saving Lives at Birth (SLAB) in Senegal aims to reduce maternal and neonatal mortality rates, through improving the timeliness of care, access to health services and strengthening community-provided services. Led by Africare, the project has 2 major interventions - maternal care groups and an mHealth system powered by CommCare. The maternal care groups are run by community health workers (Matrones), and these meetings are used to inform and teach pregnant women about their pregnancies and also to help identify pregnant women as early as possible during their pregnancies. The matrones at the cas de sante level and another for the nurse at the poste de sante level use CommCare to track pregnancy danger signs, track referrals and provide counselling. | Service delivery          |
| electronic Integrated Disease Surveillance and Response (eIDSR) Nelson Clemens,<br>nelson.clemens@sl.ehealthafrica.org | Sierra Leone | 01/02/2016 | The eIDSR project aims to improve the quality and timeliness of IDSR reporting. This is being achieved through implementation of DHIS2 at district level and the through provision of a tablet and a custom DHIS2 data entry app at facility level. The project also provides training and support to data entry clerks and health facility workers on use of the new technology.                                                                                                                                                                                                                                                                                                                                                                                                                                       | Health information system |

|                                                                                                                                              |              |            |                                                                                                                                                                                                                                                                                                                                                                                                                                                                                                  |                                             |
|----------------------------------------------------------------------------------------------------------------------------------------------|--------------|------------|--------------------------------------------------------------------------------------------------------------------------------------------------------------------------------------------------------------------------------------------------------------------------------------------------------------------------------------------------------------------------------------------------------------------------------------------------------------------------------------------------|---------------------------------------------|
| CHAMPS DAYO SPENCER-WALTERS,<br>dayo.spencer-walters@sl.ehealthafrica.org                                                                    | Sierra Leone | 01/03/2017 | We aim to ensure that all deaths are reported to the 117 system, both from the hospital and communities. This way, mortality surveillance will be improved and causes of deaths in under fives identified                                                                                                                                                                                                                                                                                        | Health information system                   |
| VaxTrac Dayo Spencer-Walters,<br>dayo.spencer-walters@sl.ehealthafrica.org                                                                   | Sierra Leone | 01/06/2016 | Electronic Vaccination Record and Tracking System                                                                                                                                                                                                                                                                                                                                                                                                                                                | Health information system, Service delivery |
| AVADAR: Auto-Visual AFP Detection and Reporting<br>Faye Simmonds,<br>faye.simmonds@sl.ehealthafrica.org                                      | Sierra Leone | 20/03/2017 | Auto Visual AFP Detection and Reporting (AVADAR) is an sms-based mobile technology innovation to improve completeness, timeliness, and availability of acute flaccid paralysis (AFP) reporting data. AVADAR addresses the above problem by “widening the net” of disease reporters, making data available in near-real time, sending automatic case alerts to disease surveillance officers (DSOs), and automatically aggregating and visualizing case alerts and investigations on a dashboard. | Health information system                   |
| 117 Alerts System Dayo Spencer-Walters,<br>dayo.spencer-walters@sl.ehealthafrica.org                                                         | Sierra Leone | 01/09/2014 | 24 hour hotline built as a syndromic and mortality surveillance tool for early detection of disease outbreaks                                                                                                                                                                                                                                                                                                                                                                                    | Health information system                   |
| Electronic Vaccination Record and Tracking System Implementation Project (VaxTrac)<br>Musa Bernard Komeh,<br>musa.komeh@sl.ehealthafrica.org | Sierra Leone | 01/06/2016 | VaxTrac is a clinic based vaccine registry tool to record vaccine data at the time and place of vaccine administration. The backbone of the system is a mobile, clinic-based immunization registry. The mobile app includes:<br>Clinical decision support to improve the quality of services delivered, Methods for defaulter tracing, Automated reporting that can reduce the administrative burden on front line health workers, and improve the quality of data.                              | Service delivery, Health information system |
| Saving Lives Mohammad B. Jalloh,<br>mbjalloh@focus1000.org                                                                                   | Sierra Leone | 02/01/2017 | We aim to enhance the quality and timely generation of HF data through the digitization of HF forms, deployment of android-based tablets at data entry points - mostly at CHC level - and possible deployment across all CHPs in a bid to promote the timely and complete generation of data from facilities to the DHIS2.                                                                                                                                                                       | Health information system, Service delivery |

|                                                                                                         |              |            |                                                                                                                                                                                                                                                                                                                                                                                                                                                                                                                                                                                                                                                                                                                                                                                                                                                                                                                                                                                                                                                        |                                              |
|---------------------------------------------------------------------------------------------------------|--------------|------------|--------------------------------------------------------------------------------------------------------------------------------------------------------------------------------------------------------------------------------------------------------------------------------------------------------------------------------------------------------------------------------------------------------------------------------------------------------------------------------------------------------------------------------------------------------------------------------------------------------------------------------------------------------------------------------------------------------------------------------------------------------------------------------------------------------------------------------------------------------------------------------------------------------------------------------------------------------------------------------------------------------------------------------------------------------|----------------------------------------------|
| RapidPro<br>Kazutaka Sekine,<br>ksekine@unicef.org                                                      | Sierra Leone | 01/09/2016 | UNICEF has been supporting MoHS to deploy RapidPro use cases for informed decision makings.                                                                                                                                                                                                                                                                                                                                                                                                                                                                                                                                                                                                                                                                                                                                                                                                                                                                                                                                                            | Health information system, Service delivery  |
| Mobile Training and Support (MOTS)<br>Frederick F. Kamara (World Vision-SL),<br>Fredrick_kamara@wvi.org | Sierra Leone | 01/02/2017 | The objective of the MOTS is to strengthen the Community Health Worker (CHW) program in support of preparedness of outbreak prevention measures, including vaccination. The development of MOTS will support building a foundation of knowledge, evidence and partnerships to be better equipped for Ebola vaccination and better prepared should a future Ebola outbreak occur.                                                                                                                                                                                                                                                                                                                                                                                                                                                                                                                                                                                                                                                                       | Human resources for health, Service delivery |
| The Safe Delivery App in Sierra Leone<br>Lauren Bellhouse, lauren@maternity.dk                          | Sierra Leone | 17/09/2018 | Building on successful implementation of the Safe Delivery App in Ghana, UNFPA Sierra Leone chose to roll out the English version of the SDA to a pilot group of midwives. Over an 8-month period, UNFPA Sierra Leone conducted a pilot project of the Safe Delivery App. In partnership with Maternity Foundation and the Ministry of Health and Sanitation, the project was implemented in four districts of Sierra Leone (Western Area, Bombali, Bo, and Kenema) and consisted of baseline data collection (Sept 2018), an introductory training, distribution of the Safe Delivery App, and endline data collection (May 2019). Pre- and post- use knowledge and skills were monitored via a survey (for knowledge) and an objective structured clinical exam (for skills). Results showed a significant difference between knowledge scores at baseline and endline, and a statistically significant increase in skills for post-partum hemorrhage. Phase II is planned (pre-service introduction to the App) once the Covid-19 situation allows. | Human resources for health, Service delivery |

|                                                                                                      |                     |                   |                                                                                                                                                                                                                                                                                                                                                                                                                                                                                                                                                                                                                                                                                                                                                                                                                                                                                                                                                                                                                                                                                                                                                                                                                                                                                                                                                                                                                                                                                                                                                                                                                   |                                                    |
|------------------------------------------------------------------------------------------------------|---------------------|-------------------|-------------------------------------------------------------------------------------------------------------------------------------------------------------------------------------------------------------------------------------------------------------------------------------------------------------------------------------------------------------------------------------------------------------------------------------------------------------------------------------------------------------------------------------------------------------------------------------------------------------------------------------------------------------------------------------------------------------------------------------------------------------------------------------------------------------------------------------------------------------------------------------------------------------------------------------------------------------------------------------------------------------------------------------------------------------------------------------------------------------------------------------------------------------------------------------------------------------------------------------------------------------------------------------------------------------------------------------------------------------------------------------------------------------------------------------------------------------------------------------------------------------------------------------------------------------------------------------------------------------------|----------------------------------------------------|
| <p>Access to Infant and Maternal (AIM) Health Plus Sierra Leone Joseph Musa, joseph_musa@wvi.org</p> | <p>Sierra Leone</p> | <p>01/01/2017</p> | <p>With the support of Irish Aid, the AIM Health Plus project addresses the leading causes of maternal and neonatal mortality and improves young child survival and nutritional status across four countries in Africa. Promoting behaviour change at the household level has been the emphasis. In Sierra Leone, the AIM Health Plus project has included a digital health component since its inception in 2017. The geographic focus is Imperi district and Sherbro Island.</p> <p>The AIM Health Plus project provides community health workers (CHWs) with smartphones equipped with a tailored version of Dimagi's CommCare software to use during their home visits. The application supports CHWs who are using the Timed and Targeted Counselling (ttC) approach to promote positive health and nutrition behaviour change among pregnant women and mothers or caregivers of children under 2. The application provides reminders to help CHWs to visit homes at the ideal time during pregnancy, infancy and childhood. It also supports CHWs as they conduct counselling sessions, including enabling them to submit community health data in near real time. This data is then used for planning and decision-making. To boost acceptability of this digital health tool, local language audio clips are incorporated into the application. This digital health intervention is expected to improve the effectiveness of behaviour change communication delivered to women and caregivers of children under 2 as well as strengthen the health system through better use of community-level data.</p> | <p>Service delivery, Health information system</p> |
|------------------------------------------------------------------------------------------------------|---------------------|-------------------|-------------------------------------------------------------------------------------------------------------------------------------------------------------------------------------------------------------------------------------------------------------------------------------------------------------------------------------------------------------------------------------------------------------------------------------------------------------------------------------------------------------------------------------------------------------------------------------------------------------------------------------------------------------------------------------------------------------------------------------------------------------------------------------------------------------------------------------------------------------------------------------------------------------------------------------------------------------------------------------------------------------------------------------------------------------------------------------------------------------------------------------------------------------------------------------------------------------------------------------------------------------------------------------------------------------------------------------------------------------------------------------------------------------------------------------------------------------------------------------------------------------------------------------------------------------------------------------------------------------------|----------------------------------------------------|

|                                                                                              |              |            |                                                                                                                                                                                                                                                                                                                                                                                                                                                                                                                                                                                                 |                                              |
|----------------------------------------------------------------------------------------------|--------------|------------|-------------------------------------------------------------------------------------------------------------------------------------------------------------------------------------------------------------------------------------------------------------------------------------------------------------------------------------------------------------------------------------------------------------------------------------------------------------------------------------------------------------------------------------------------------------------------------------------------|----------------------------------------------|
| Global Open Facility Registry (GOFR) Reconciliation Tool Telli Koroma, tellikoroma@gmail.com | Sierra Leone | 28/02/2018 | The Facility Reconciliation Tool is an open source and open standards-based product to help anyone match lists of facilities from different data sources. The tools supports uploading data from CSV, FHIR servers and DHIS2 instances.                                                                                                                                                                                                                                                                                                                                                         | Health information system                    |
| MOTS COVID-19 Monica Amponsah, mamponsah@grameenfoundation.org                               | Sierra Leone | 13/08/2020 | MOTS is a mobile service that provides refresher training via voice on vaccination and outbreak response to Community Health Workers (CHWs) with a feature phone as the only requirement. MOTS allows CHWs to receive training in the language of their choice at their own convenience.                                                                                                                                                                                                                                                                                                        | Service delivery, Human resources for health |
| DHIS2 for COVID-19 Surveillance: Sierra Leone Rebecca Potter, covid@dhis2.org                | Sierra Leone | 08/05/2020 | Sierra Leone customized their DHIS2 system for Covid-19 surveillance                                                                                                                                                                                                                                                                                                                                                                                                                                                                                                                            | Health information system                    |
| Instant OpenHIE Daniel Futerman, daniel.futerman@jembi.org                                   | South Africa | 01/12/2019 | The Instant OpenHIE project aims to address the primary needs of (i) allowing implementers to engage with a preconfigured health information exchange solution and running tools (based on the architecture) and test their applicability and functionality with a real health context problem; and (ii) having a packaged reference version of the OpenHIE architecture that is comprised of a set of reference technologies and other appropriate tools that form the building blocks of the health information exchange that can be configured and extended to support particular use cases. | Health information system                    |
| OpenHIM (Open Health Information Mediator) Daniel Futerman, daniel.futerman@jembi.org        | South Africa | 01/01/2015 | The Open Health Information Mediator (OpenHIM) is a middleware component designed to ease interoperability between disparate information systems. It provides secure communications and data governance, as well as support for routing, orchestrating and translating requests as they flow between systems.<br><br>The OpenHIM is intended as an extensible tool to support interoperability workflows across a wide range of information systems, metadata                                                                                                                                   | Health information system                    |



|                                                                           |              |            |                                                                                                                                                                                                                                                                                                                                                                                                                                                                                                                                                                                                                                                                                                                                                                                                                                                                                                                                                                                                                                                                  |                                             |
|---------------------------------------------------------------------------|--------------|------------|------------------------------------------------------------------------------------------------------------------------------------------------------------------------------------------------------------------------------------------------------------------------------------------------------------------------------------------------------------------------------------------------------------------------------------------------------------------------------------------------------------------------------------------------------------------------------------------------------------------------------------------------------------------------------------------------------------------------------------------------------------------------------------------------------------------------------------------------------------------------------------------------------------------------------------------------------------------------------------------------------------------------------------------------------------------|---------------------------------------------|
|                                                                           |              |            | services and HIE components, and data standards.                                                                                                                                                                                                                                                                                                                                                                                                                                                                                                                                                                                                                                                                                                                                                                                                                                                                                                                                                                                                                 |                                             |
| Public Health Incentives Gugulethu Nyathi,<br>gugu@ribbonblockchain.com   | South Africa | 19/04/2018 | Our technology ushers in the Uberization of Public Health, where the App enables value creation for Community Health Workers, Patients and Practitioners in the public health system. The app enables CHWs to enrol as Care Partners to assist Patients to earn incentives for testing, initiating treatment, adherence to medicine, disease suppression, and living healthier lifestyles. It also enables Patients to rate the Patient Experience of Care (PEC) thereby enabling Practitioners to earn an incentive based on the Quality of care. delivery. This collaboration system creates a network effect resulting in continuous cycle of improved disease prevention, population health outcomes, quality of care delivery and employment for Community Health Workers. Health data generated from this system is beneficiated and monetized via data analytics and the proceeds shared equitably across the participants and the platform. The reason for deploying the system is to automate public health systems for efficiency & UHC implementation | Service delivery                            |
| NACOSA Health Analytics Platform (NHAP)<br>Safa Naraghi, safa@zenysis.com | South Africa | 13/11/2017 | NACOSA is one of the largest implementers of HIV prevention programs in South Africa. The NHAP integrates programmatic, financial and individual-level data from NACOSA's largest sub-recipients in order to better understand Service delivery performance, client retention, cost effectiveness and spending efficiency for each of its sub-recipients among other technical improvements.                                                                                                                                                                                                                                                                                                                                                                                                                                                                                                                                                                                                                                                                     | Service delivery, Health information system |

|                                                                                      |                     |                   |                                                                                                                                                                                                                                                                                                                                                                                                                                                                                                                                                                                                                                                                                                                                                                                                                                                                                                                                                                                                                                                                    |                                                    |
|--------------------------------------------------------------------------------------|---------------------|-------------------|--------------------------------------------------------------------------------------------------------------------------------------------------------------------------------------------------------------------------------------------------------------------------------------------------------------------------------------------------------------------------------------------------------------------------------------------------------------------------------------------------------------------------------------------------------------------------------------------------------------------------------------------------------------------------------------------------------------------------------------------------------------------------------------------------------------------------------------------------------------------------------------------------------------------------------------------------------------------------------------------------------------------------------------------------------------------|----------------------------------------------------|
| <p>BroadReach COVID-19 Pandemic Management Fiona de Korte, fdekorte@brhc.com</p>     | <p>South Africa</p> | <p>06/04/2020</p> | <p>BroadReach Consulting (BRC) with Vantage Technologies have developed an application and platform-based solution package technologically enabling both the demand and supply side of pandemic management. The demand or patient management side enables population-based screening and testing, contact tracing, and epidemiological surveillance, and the supply or facility management side enables leaders and managers to assess and address facility readiness, stock management and workforce wellness. The users of the solution are front line healthcare workers and decision-makers responsible for operating and managing networks of healthcare clinics and hospitals (e.g., ministries of health, private and NGO hospital/clinics). This solution allows stakeholders to prevent, identify and treat patients of COVID-19 and assess the readiness of facilities to respond to the virus. The solution is currently deployed in South Africa. Further phases of deployment include scaling up the solution in Sub-Saharan Africa and globally.</p> | <p>Service delivery, Health information system</p> |
| <p>DHIS2 for COVID-19 Surveillance: South Africa Rebecca Potter, covid@dhis2.org</p> | <p>South Africa</p> | <p>08/05/2020</p> | <p>South Africa customized their DHIS2 system for Covid-19 surveillance with assistance from local partners</p>                                                                                                                                                                                                                                                                                                                                                                                                                                                                                                                                                                                                                                                                                                                                                                                                                                                                                                                                                    | <p>Health information system</p>                   |

|                                                                          |                     |                   |                                                                                                                                                                                                                                                                                                                                                                                                                                                                                                                                                                                                                                                                                                                                                                                                                                                                                                                                                                                                                                                                                                                                         |                                  |
|--------------------------------------------------------------------------|---------------------|-------------------|-----------------------------------------------------------------------------------------------------------------------------------------------------------------------------------------------------------------------------------------------------------------------------------------------------------------------------------------------------------------------------------------------------------------------------------------------------------------------------------------------------------------------------------------------------------------------------------------------------------------------------------------------------------------------------------------------------------------------------------------------------------------------------------------------------------------------------------------------------------------------------------------------------------------------------------------------------------------------------------------------------------------------------------------------------------------------------------------------------------------------------------------|----------------------------------|
| <p>HIV Solution powered by Vantage Todd Malone, Todd.Malone@brhc.com</p> | <p>South Africa</p> | <p>01/09/2019</p> | <p>Vantage is currently an integral part of BroadReach Consulting's support within USAID's Accelerating Program Achievements to Control the Epidemic (APACE) program in South Africa. BroadReach, with Vantage, assists governments and implementing partner organizations to improve individual and population health outcomes at scale. Vantage is a 4th Industrial Revolution technology platform which leverages cloud computing, Artificial Intelligence and advanced data analytics to help governments and organizations use their next dollar and the next hour more effectively. Vantage provides:</p> <ul style="list-style-type: none"> <li>• Powerful on-demand insights (decision support) for all stakeholders</li> <li>• Vastly improved management, governance, transparency and accountability</li> <li>• The ability to manage large workforces more effectively and at scale</li> <li>• A means to rapidly scale up good and best practices while assuring quality</li> <li>• Radical reduction in the time to develop, disseminate and digest reports, giving managers more time to focus on priorities.</li> </ul> | <p>Health information system</p> |
| <p>COVID 19 - Safe Entry Management Kent Perils, kent@bcpi.co.za</p>     | <p>South Africa</p> | <p>03/10/2020</p> | <p>We offer a COVID -19 Safe Entry Management digital solution for the workplace, office, factory, venue, or any place of gathering. Our mobile application includes: Self Screening through health diagnosis including comorbidity diagnosis, Safe Entry Management - This allows a user safe entry into a venue displaying no signs or symptoms of the COVID-19, Case Management - This is a dashboard for Business Managers, HR Departments, RISK and SHE Departments to manage all employee related positive cases for Self Isolation, and Quarantine .</p>                                                                                                                                                                                                                                                                                                                                                                                                                                                                                                                                                                         | <p>Health information system</p> |

|                                                                                          |              |            |                                                                                                                                                                                                                                                                                                                                                                                                                                                                                                                                                                                 |                                             |
|------------------------------------------------------------------------------------------|--------------|------------|---------------------------------------------------------------------------------------------------------------------------------------------------------------------------------------------------------------------------------------------------------------------------------------------------------------------------------------------------------------------------------------------------------------------------------------------------------------------------------------------------------------------------------------------------------------------------------|---------------------------------------------|
| Vula Mobile<br>William Mapham,<br>william@vulamobile.com                                 | South Africa | 24/11/2021 | Vula Mobile connects frontline health workers with specialists. We provide a safe and secure platform to refer patients and share advice                                                                                                                                                                                                                                                                                                                                                                                                                                        | Service delivery                            |
| eLQAS: Collecting real-time polio vaccination data<br>Yaw Anokwa,<br>yanokwa@nafundi.com | South Sudan  | 01/11/2014 | eLQAS is an electronic version of LQAS that uses phones and tablets to improve rapid monitoring of polio vaccination. Implemented as a free and open-source form in Open Data Kit, eLQAS enables real time results, increased data quality, improved accountability, and easier implementation.                                                                                                                                                                                                                                                                                 | Health information system, Service delivery |
| e-Hospital - South Sudan<br>Steven Wanyee,<br>swanyee@intellisoftkenya.com               | South Sudan  | 01/06/2019 | eHospital is an end-to-end hospital information system that integrates medical records system, lab system, and ERP in a distribution that addresses the workflows, forms, and reports of the East African market. In addition to being an end-to-end facility system which captures fundamental patient touchpoints, eHospital is a distribution of Bahmni. This essentially means that eHospital leverages the software excellence and technical architecture of a globally proven system backed by a strong community committed to the continuous development of the product. | Service delivery                            |

|                                                                                                                                                            |                    |                   |                                                                                                                                                                                                                                                                                                                                                                                                                                                                                                                                                                                                                                                                                                                                                                                                                                                                                                                                                                                                                                                                                                                                                                                                                                                                                                                                                                                                                      |                         |
|------------------------------------------------------------------------------------------------------------------------------------------------------------|--------------------|-------------------|----------------------------------------------------------------------------------------------------------------------------------------------------------------------------------------------------------------------------------------------------------------------------------------------------------------------------------------------------------------------------------------------------------------------------------------------------------------------------------------------------------------------------------------------------------------------------------------------------------------------------------------------------------------------------------------------------------------------------------------------------------------------------------------------------------------------------------------------------------------------------------------------------------------------------------------------------------------------------------------------------------------------------------------------------------------------------------------------------------------------------------------------------------------------------------------------------------------------------------------------------------------------------------------------------------------------------------------------------------------------------------------------------------------------|-------------------------|
| <p>Integrated Humanitarian Data Package for public health data needs Jonathan Hanson, <a href="mailto:jhanson@mapaction.org">jhanson@mapaction.org</a></p> | <p>South Sudan</p> | <p>01/04/2021</p> | <p>The underlying issue we address is the time, cost and expertise needed to select and prepare geographic datasets for vaccine planning and delivery. Most of the geographic tools, analyses and services being developed for Covid vaccine planning and delivery are underpinned geographic datasets, particularly relating to target population, health facilities, and logistics. But sourcing and preparing suitable data remains a significant bottleneck. One excellent project – analysing accessibility to health facilities in South East Asia – reported to the Covax GIS Working Group that “it still takes 70-80% of an entire project’s time to address data-related issues to conduct this type of analysis”. This figure of around 75% is widely reported in projects reliant on data for mapping, analysis and services. With many partners typically involved in each country’s National Deployment and Vaccination Plan, this effort will be duplicated many times, resulting in additional cost, time delays, capacity barriers, and inconsistencies. In contexts where datasets are typically out of date, incomplete, or unreliable, the problem becomes especially pronounced.</p> <p>We also see the integrated data package model as having wider application in public health and humanitarian contexts, being scalable to different geographies and adaptable to different use cases.</p> | <p>Service delivery</p> |
|------------------------------------------------------------------------------------------------------------------------------------------------------------|--------------------|-------------------|----------------------------------------------------------------------------------------------------------------------------------------------------------------------------------------------------------------------------------------------------------------------------------------------------------------------------------------------------------------------------------------------------------------------------------------------------------------------------------------------------------------------------------------------------------------------------------------------------------------------------------------------------------------------------------------------------------------------------------------------------------------------------------------------------------------------------------------------------------------------------------------------------------------------------------------------------------------------------------------------------------------------------------------------------------------------------------------------------------------------------------------------------------------------------------------------------------------------------------------------------------------------------------------------------------------------------------------------------------------------------------------------------------------------|-------------------------|

|                                                                                                                                                           |       |            |                                                                                                                                                                                                                                                                                                                                                                                                                                                                                                                                                                                                                                                                                                                                                 |                                             |
|-----------------------------------------------------------------------------------------------------------------------------------------------------------|-------|------------|-------------------------------------------------------------------------------------------------------------------------------------------------------------------------------------------------------------------------------------------------------------------------------------------------------------------------------------------------------------------------------------------------------------------------------------------------------------------------------------------------------------------------------------------------------------------------------------------------------------------------------------------------------------------------------------------------------------------------------------------------|---------------------------------------------|
| Improving Healthcare Capacity and Access Using THINKMD's Clinical Decision Support Tool in a Humanitarian Setting Meg McLaughlin, mmclaughlin@thinkmd.org | Sudan | 01/05/2019 | The MEDSINC platform is currently being implemented by Medical Assistants working in community clinics within East and West Darfur. Medical Assistants are able to triage and treat incoming patients. Through the use of THINKMD's platform, Medical Assistants are able to automatically record all patient interaction; automatically generate triage, treatment and follow-up recommendations; monitor their workforce; monitor each facilities' patient flow; track population health; and report to the Ministry of Health.                                                                                                                                                                                                               | Service delivery, Health information system |
| NEMO Andrew Nute, andrew.nute@cartercenter.org                                                                                                            | Sudan | 26/06/2018 | NEMO is a server software that provides a user-friendly portal accessible as a website through a web browser. When logged into the server, the user can design survey forms using a simple and intuitive process that does not require an understanding of XML code (interpreted by Open Data Kit Collect). The user then can publish the forms as XML to make them accessible to Android tablets that connect to the NEMO server using the administratively assigned secure credentials of the tablet user. After collection and submission of completed survey responses, the NEMO portal also allows for aggregating response data to build and export data sets and generate reports that can be saved in the user portal like a dashboard. | Health information system                   |
| DHIS2 for COVID-19 Surveillance: Sudan (in development) Rebecca Potter, covid@dhis2.org                                                                   | Sudan | 08/05/2020 | The DHIS2 digital data package for COVID-19 is designed to accelerate case detection, situation reporting, active surveillance and response in countries. The COVID-19 digital data package includes standard metadata aligned with the WHO's technical guidance on COVID-19 surveillance and has been adapted to local country context and language in this implementation.                                                                                                                                                                                                                                                                                                                                                                    | Health information system                   |

|                                                                                                      |                  |                   |                                                                                                                                                                                                                                                                                                                                                                                                                                                                                                                                                                                                                                                                                                                                                                                                                                                                          |                                                                      |
|------------------------------------------------------------------------------------------------------|------------------|-------------------|--------------------------------------------------------------------------------------------------------------------------------------------------------------------------------------------------------------------------------------------------------------------------------------------------------------------------------------------------------------------------------------------------------------------------------------------------------------------------------------------------------------------------------------------------------------------------------------------------------------------------------------------------------------------------------------------------------------------------------------------------------------------------------------------------------------------------------------------------------------------------|----------------------------------------------------------------------|
| <p>eLMIS Facility Edition (FE) Ashraf Islam, ashraf_islam@jsi.com</p>                                | <p>Swaziland</p> |                   | <p>eLMIS FE has recently been upgraded from a Java Swing based client server application to a web-based two tier application with a PostgreSQL database back-end. At each health facility implementation, it works on their local area network (LAN) to enable multiple user access to the same application. It supports off-line access to it from within the LAN, without having to use internet, since it is a local installation within the facility. It can produce a monthly report and requisition (R&amp;R).</p>                                                                                                                                                                                                                                                                                                                                                 | <p>Service delivery, access to medicine, vaccines and technology</p> |
| <p>The Safe Delivery App in Togo (part of DI 2018 Project) Lauren Bellhouse, lauren@maternity.dk</p> | <p>Togo</p>      | <p>01/08/2018</p> | <p>As part of the larger DI 2018 Project of PlanBornefonden, the French Language Safe Delivery App was rolled out as a job aid for skilled birth attendants in Haho prefecture. A TOT took place in Haho for 6 trainers and district officials in August, 2018; baseline knowledge and confidence surveys were conducted Sept 2018. As of Feb 2020, user data confirms a solid uptake of the App in in-service settings (over 350 downloads nationally), with a heavy concentration in the Plan International project district (Haho) as well as use in Lomé and Kara, where partner organizations who have participated in Maternity Foundation/ Plan International trainings are based. For the pilot project of 47 midwives in Haho, at end-line the results indicated that the SDA has had a positive effect on clinical knowledge and confidence from baseline.</p> | <p>Service delivery</p>                                              |

|                                                                                                        |             |                   |                                                                                                                                                                                                                                                                                                                                                                                                                                                                                                                                                                                                                                                                                                                                                                                                                                                                                                                                     |                                  |
|--------------------------------------------------------------------------------------------------------|-------------|-------------------|-------------------------------------------------------------------------------------------------------------------------------------------------------------------------------------------------------------------------------------------------------------------------------------------------------------------------------------------------------------------------------------------------------------------------------------------------------------------------------------------------------------------------------------------------------------------------------------------------------------------------------------------------------------------------------------------------------------------------------------------------------------------------------------------------------------------------------------------------------------------------------------------------------------------------------------|----------------------------------|
| <p>Digital Tools for CHWs with Integrate Health and Medic Mobile Fatou Fall, fatou@medicmobile.org</p> | <p>Togo</p> | <p>01/02/2017</p> | <p>Integrate Health (IH) and Medic Mobile co-designed a mobile application to support CHWs to deliver equitable and quality doorstep care. Building on IH's model that aim to save lives in neglected communities the application supports 27 CHWs in decision making (referral, diagnosis, treatment), targeted follow ups for closed loop care, and offline data collection. The technology links care provided at doorstep and health facility levels through a unique patient ID system, tracks longitudinally care provided, enhances data transmission and analysis for evidence based decision making. At the facility level, the health workers are supported to log services provided to the patients for ease of follow up at CHW level. The technology will evolve to be fit the model iterations. Data will be used to inform iterations at functionality, workflow and features levels to support fit-for-purpose.</p> | <p>Service delivery</p>          |
| <p>Togo Health Analytics Platform (THAP) Quentin Perrot, quentin@zenysis.com</p>                       | <p>Togo</p> | <p>01/03/2018</p> | <p>THAP was a platform developed by Zenysis Technologies and led by the Togo Ministry of Health that integrates data from a number of siloed systems. By joining data on routine health, inventory and health campaign, THAP helped the Togolese Ministry of Health and Social Protection's National Malaria Program (PNLP) better understand malaria transmission patterns, target interventions to reduce malaria disease burden and identify supply chain inefficiencies.</p>                                                                                                                                                                                                                                                                                                                                                                                                                                                    | <p>Health information system</p> |



|                                                                     |        |            |                                                                                                                                                                                                                                                                                                                                                                                                                                                                                                                                                                                                                                                                                                                                                                                                                                                                              |                                             |
|---------------------------------------------------------------------|--------|------------|------------------------------------------------------------------------------------------------------------------------------------------------------------------------------------------------------------------------------------------------------------------------------------------------------------------------------------------------------------------------------------------------------------------------------------------------------------------------------------------------------------------------------------------------------------------------------------------------------------------------------------------------------------------------------------------------------------------------------------------------------------------------------------------------------------------------------------------------------------------------------|---------------------------------------------|
| Télédermatologie TOGO Palokinam<br>PITCHE, vincent.pitche@gmail.com | Togo   | 01/06/2018 | In our project we use provider to provider telemedecine to support primary health workers who have previously been trained to manage infectious skin conditions like impetigo, scabies fungus infections. Then if they can solve a kind of dermatosis they use Bogou Platform to send this case. Bogou is the telexpertise platform lead by the "Reseau en Afrique Francophone pour la Télémédecine" RAFT. Our project intend to address the needs of dermatological care in rural areas of 4/6 health regions in the whole country where there is no dermatologist. The aims are quality and accessibility of dermatological care to individuals living in remote areas of Togo. we started this project since june 2018 and launched the use of Bogou on may 2019 in 20 pilot health care facilities. If the first assessment is positive we will generalized in 30 others | Service delivery                            |
| mTrac Sean Blaschke, sblaschke@unicef.org                           | Uganda | 01/10/2011 | mTrac is part of the MoH's national eHMIS system, integrated into DHIS2 and iHRIS. It allows submission of Weekly HMIS Surveillance Forms by SMS, alerts to predefined user groups based on notifiable events or data outliers, communications / surveys / polls initiated by government staff at the National and District level to all Health Workers, and health care consumers to report on their experiences as well as any Service delivery issues (stock-outs of commodities, extortion, etc).                                                                                                                                                                                                                                                                                                                                                                        | Health information system                   |
| UgandaEMR (OpenMRS) Jonathan Mpango, jmpango@musph.ac.ug            | Uganda | 01/12/2015 | Health facility patient level electronic medical records system                                                                                                                                                                                                                                                                                                                                                                                                                                                                                                                                                                                                                                                                                                                                                                                                              | Health information system, Service delivery |

|                                                                                                                                                    |        |            |                                                                                                                                                                                                                                                                                                                                                                                                                                                                                                        |                            |
|----------------------------------------------------------------------------------------------------------------------------------------------------|--------|------------|--------------------------------------------------------------------------------------------------------------------------------------------------------------------------------------------------------------------------------------------------------------------------------------------------------------------------------------------------------------------------------------------------------------------------------------------------------------------------------------------------------|----------------------------|
| Improving health worker adherence to IPTp provision guidelines through sending text messages<br>Christian Rassi,<br>c.rassi@malariaconsortium.org  | Uganda | 01/01/2015 | This pilot study explored the feasibility and acceptability of an mHealth intervention which involved complementing classroom training with sending educational text messages to health workers. Training and text messages were designed to improve health workers' knowledge of and adherence to national guidelines for the provision of intermittent preventive treatment of malaria in pregnancy (IPTp). Evaluation of the pilot is complete and we are currently exploring options for scale-up. | Human resources for health |
| : Improving outcomes in HIV patients using mobile phone based interactive software support<br>Rosalind Parkes Ratanshi,<br>rp549@medschl.cam.ac.uk | Uganda | 01/12/2016 | Ugandan Academy for Health Innovation & Impact is implementing an open source software-based tool to send messages and interactive voice response to people living with HIV, using the MoTeCh Software developed by Janssen & Janssen; previously used in India "Connect for Life" as a mobile technology for community health. The technology offers: Clinic appointment reminders, Supports weekly self-reported adherence, Weekly health info-tips, +/- Symptom reporting.                          | Service delivery           |
| ART ACCESS Dr Rosalind Parkes-Ratanshi,<br>rp549@medschl.cam.ac.uk                                                                                 | Uganda | 01/01/2018 | We are developing a pilot mHealth tool (ART Access App) to link patient information on ART and viral load to an algorithm which guides a community pharmacy on ART delivery without the need for the stable patients to go to the health facilities for drug refills. The application will capture the patients' demographics, unique identifier, current ART regimen, current viral load, treatment adherence score, clinical complaints, follow-up outcomes and reasons for missing appointments.    | Service delivery           |

|                                                                                                    |               |                   |                                                                                                                                                                                                                                                                                                                                                                                                                                                                                                                                                                                                                                                                                                                                                                                                                                                                                                                                                                                                                                                                      |                                   |
|----------------------------------------------------------------------------------------------------|---------------|-------------------|----------------------------------------------------------------------------------------------------------------------------------------------------------------------------------------------------------------------------------------------------------------------------------------------------------------------------------------------------------------------------------------------------------------------------------------------------------------------------------------------------------------------------------------------------------------------------------------------------------------------------------------------------------------------------------------------------------------------------------------------------------------------------------------------------------------------------------------------------------------------------------------------------------------------------------------------------------------------------------------------------------------------------------------------------------------------|-----------------------------------|
| <p>Connect for Life - Infectious Disease Institute (IDI) Theresa Pattery, tpattery@its.jnj.com</p> | <p>Uganda</p> | <p>01/07/2015</p> | <p>Attendance at clinic appointments, patient-support tools (daily pill reminder and health tip on topics covering adherence, nutrition, healthy lifestyle with disease-related information), supportive management of medication side-effects along with HIV knowledge using CfL is an effective predictor of virological outcomes positively impacting quality of life. This is demonstrated with CfL Randomized Controlled Trial &amp; CfL Lite study (weekly support for ART-stable, undetectable viral load patients).</p>                                                                                                                                                                                                                                                                                                                                                                                                                                                                                                                                      | <p>Service delivery</p>           |
| <p>Duty Roster and Attendance Tracking Mobile Application Dennis Kibiye, kibsden@gmail.com</p>     | <p>Uganda</p> | <p>01/07/2018</p> | <p>The absenteeism rate of public health workers was too high in Uganda, about 47% by end of FY 2015, it was agreed that attendance to duty should start being tracked so as to reduce this rate, because it had led to poor Service delivery and low outputs, however after development of the attendance module in a Human resource Management system, it was noted that the duty roster to schedule staff for duty had to be implemented as well but many facilities lacked computers to implement this system, so there was need to develop a mobile application to help lower level facilities access the duty roster and attendance tracking system Intrahealth International in conjunction with the Ministry of health Uganda designed a mobile application that would help facility in charges and district leadership to address the issue of tracking and reporting on absenteeism on a monthly basis for each public health worker. The results of the initiative have been positive in a way that currently the absenteeism rate has reduced to 11%</p> | <p>Human resources for health</p> |

|                                                                                                                           |               |                   |                                                                                                                                                                                                                                                                                                                                                                                                                                                                                                                                                                                                                      |                                                    |
|---------------------------------------------------------------------------------------------------------------------------|---------------|-------------------|----------------------------------------------------------------------------------------------------------------------------------------------------------------------------------------------------------------------------------------------------------------------------------------------------------------------------------------------------------------------------------------------------------------------------------------------------------------------------------------------------------------------------------------------------------------------------------------------------------------------|----------------------------------------------------|
| <p>STRE@MLINE Mr Samuel Mugisha, CEO<br/>Innovation Streams Ltd,<br/>samuel@innovationstreams.tech</p>                    | <p>Uganda</p> | <p>01/01/2015</p> | <p>Stre@mline is an exciting, unique integrated patient-centred software program incorporating key patient safety features e.g. WHO Emergency Triage, Assessment &amp; Treatment (ETAT) tool, clinical prompts and immediate access to specific WHO and national guidelines. Stre@mline includes patient records, prescribing, audit, stock control, billing, HMIS reports and follows the full patient journey. Stre@mline incorporates health insurance membership demographics allowing real time analysis of usage of the scheme. See <a href="http://www.streamlinehealth.org">www.streamlinehealth.org</a></p> | <p>Health informaiton system, Service delivery</p> |
| <p>REFERENCE LABORATORY<br/>INFORMATION SYSTEMS (EID/VL<br/>LIMS) PROSCOVIA NAMBUYA<br/>MBABAZI, pronam2000@gmail.com</p> | <p>Uganda</p> | <p>03/03/2014</p> | <p>This system is used for data capture, processing and generation of Lab Test results for Viral Load and EID programs at UNHLS- CPHL.</p>                                                                                                                                                                                                                                                                                                                                                                                                                                                                           | <p>Service delivery</p>                            |

|                                                                                                  |               |                   |                                                                                                                                                                                                                                                                                                                                                                                                                                                                                                                                                                                                                                                                                                                                                                                                                                                                                                                                                                                                                                                                                                                                                                                                                                                                                                           |                         |
|--------------------------------------------------------------------------------------------------|---------------|-------------------|-----------------------------------------------------------------------------------------------------------------------------------------------------------------------------------------------------------------------------------------------------------------------------------------------------------------------------------------------------------------------------------------------------------------------------------------------------------------------------------------------------------------------------------------------------------------------------------------------------------------------------------------------------------------------------------------------------------------------------------------------------------------------------------------------------------------------------------------------------------------------------------------------------------------------------------------------------------------------------------------------------------------------------------------------------------------------------------------------------------------------------------------------------------------------------------------------------------------------------------------------------------------------------------------------------------|-------------------------|
| <p>Access to Infant and Maternal (AIM) Health Plus Uganda Racheal Auma, racheal_auma@wvi.org</p> | <p>Uganda</p> | <p>01/01/2017</p> | <p>Supported by Irish Aid, the AIM Health Plus project addresses the leading causes of maternal and neonatal mortality and improves young child survival and nutritional status across four countries in Africa with an emphasis on promoting behaviour change at the household level. The Ugandan deployment of the AIM Health Plus project, centred in Busia district, has included a digital health component since its inception in 2017.</p> <p>The AIM Health Plus project provides village health teams (VHTs) with smartphones equipped with Dimagi's CommCare application to use during their home visits. The application supports VHTs who use the Timed and Targeted Counselling (ttC) approach to promote health and nutrition behaviour change among pregnant women and among mothers or caregivers of children under 2 years of age. The application reminds VHTs to visit homes during the pregnancy, infancy and childhood stages and also supports VHTs as they conduct counselling sessions, enabling them to submit community health data in near real time. This digital health intervention is expected to improve the effectiveness of the communication delivered to women and caregivers as well as strengthen the health system through better use of community-level data.</p> | <p>Service delivery</p> |
|--------------------------------------------------------------------------------------------------|---------------|-------------------|-----------------------------------------------------------------------------------------------------------------------------------------------------------------------------------------------------------------------------------------------------------------------------------------------------------------------------------------------------------------------------------------------------------------------------------------------------------------------------------------------------------------------------------------------------------------------------------------------------------------------------------------------------------------------------------------------------------------------------------------------------------------------------------------------------------------------------------------------------------------------------------------------------------------------------------------------------------------------------------------------------------------------------------------------------------------------------------------------------------------------------------------------------------------------------------------------------------------------------------------------------------------------------------------------------------|-------------------------|

|                                                                                                                                             |               |                   |                                                                                                                                                                                                                                                                                                                                                                                                                                                                                                                                                                                                                                                                                                                                                                                                                                                                                                                                                                                                                                                                       |                                                    |
|---------------------------------------------------------------------------------------------------------------------------------------------|---------------|-------------------|-----------------------------------------------------------------------------------------------------------------------------------------------------------------------------------------------------------------------------------------------------------------------------------------------------------------------------------------------------------------------------------------------------------------------------------------------------------------------------------------------------------------------------------------------------------------------------------------------------------------------------------------------------------------------------------------------------------------------------------------------------------------------------------------------------------------------------------------------------------------------------------------------------------------------------------------------------------------------------------------------------------------------------------------------------------------------|----------------------------------------------------|
| <p>SmartHealth App in Uganda Nii Amon Dsane, ndsane@livinggoods.org</p>                                                                     | <p>Uganda</p> | <p>01/05/2016</p> | <p>Living Goods and Medic Mobile collaborated to create a powerful set of mobile and web tools to support the Community Health Workers (CHWs) assisted by Living Goods. Built on Community Health Toolkit Framework core, the open-source Smart Health app is used by CHWs to support delivery of high quality and integrated primary health care services, including common childhood diseases such as malaria, diarrhea and pneumonia; maternal and neonatal care, family planning and immunization referral services. Although Living Goods independently configured its immunization and COVID-19 workflows, it still actively collaborates with Medic Mobile for ongoing technical support, including needs assessments, technology strategy and upgrades. The mobile application also has a supervisor dashboard that enables the real-time remote management of CHW's, also helps manage effective stocking of medical commodities, and is being used to provide government with critical data to better plan and budget for community-level interventions</p> | <p>Service delivery, Health information system</p> |
| <p>MNCH mobile content with nutrition focus, available in 5 languages in SMS and voice transcript format Kim Viljoen, kviljoen@gsma.com</p> | <p>Uganda</p> | <p>01/09/2013</p> | <p>The GSMA, together with its global content consortium lead by CABI, developed open-source nutrition and MNCH mobile ready content for Uganda available in Luganda, Rukiga, Atesot, Langi and English. All content was produced by in-country specialists and is based on recommended MNCH and local nutrition practices. The Ministry of Health played a vital role in the development and content validation. The Content is available in the form of: topic-specific factsheets, SMSs and voice message transcripts.</p>                                                                                                                                                                                                                                                                                                                                                                                                                                                                                                                                         | <p>Service delivery</p>                            |

|                                                                                                                                                                                         |               |                   |                                                                                                                                                                                                                                                                                                                                                                                                                                                                                                                                                                                                                                                                                                                                                                                                                                                                                                                                                                                                                                                                |                         |
|-----------------------------------------------------------------------------------------------------------------------------------------------------------------------------------------|---------------|-------------------|----------------------------------------------------------------------------------------------------------------------------------------------------------------------------------------------------------------------------------------------------------------------------------------------------------------------------------------------------------------------------------------------------------------------------------------------------------------------------------------------------------------------------------------------------------------------------------------------------------------------------------------------------------------------------------------------------------------------------------------------------------------------------------------------------------------------------------------------------------------------------------------------------------------------------------------------------------------------------------------------------------------------------------------------------------------|-------------------------|
| <p>NoviGuide: Tablet-based clinical decision support bringing neonatal expertise to the bedside while uncovering barriers to care<br/>Joshua Bress, josh.bress@globalstrategies.org</p> | <p>Uganda</p> | <p>01/03/2017</p> | <p>NoviGuide is a tablet-based companion for clinicians who care for newborns. Quick, visually engaging, and fully-featured, NoviGuide's dynamic decision trees support providers through a care encounter, expanding lines of questioning in response to danger signs. Complex neonatal care protocols become second nature, with error-prone manual calculations a thing of the past. Babies get rapid, precise care. Care delivery then combines with data collection. Each encounter helps build a picture of the care landscape, data syncing later if connectivity is limited. An Insights Dashboard provides lively visualizations and identifies problem areas, and can connect to a DHIS2 instance. NoviGuide was developed through a co-design process involving neonatal specialists, neonatal pharmacists, software developers, and frontline bedside clinicians providing care in low-resource settings. Following extensive studies in KwaZulu-Natal, South Africa, and Tororo, Uganda, it is ready to serve new clinics in new geographies.</p> | <p>Service delivery</p> |
| <p>The Zone Raquel Palomino Gonzalez, lund@unfpa.org</p>                                                                                                                                | <p>Uganda</p> | <p>01/04/2017</p> | <p>An ICT platform providing integrated information on life skills as well as SRH, HIV and STI prevention and other health issues. The platform currently comprises of a website, and work is ongoing to make the information accessible through mobile phones. In addition, Global Mobile will be installed on 300 digital drums (heavy duty, durable community computers), which will be placed across the county in areas with low access to technology and internet. Strong evidence suggests that a significant link exists between income generation and SRH outcomes of young people, therefore an aspect of savings and business development has been incorporated. The Zone offers as well a platform to track quality of services delivered to young people, and easy</p>                                                                                                                                                                                                                                                                            | <p>Service delivery</p> |

|                                                                              |        |            |                                                                                                                                                                                                                                                                                                                                                                                                                                                                                                                                                                                  |                                                                |
|------------------------------------------------------------------------------|--------|------------|----------------------------------------------------------------------------------------------------------------------------------------------------------------------------------------------------------------------------------------------------------------------------------------------------------------------------------------------------------------------------------------------------------------------------------------------------------------------------------------------------------------------------------------------------------------------------------|----------------------------------------------------------------|
|                                                                              |        |            | referrals to service providers at healthcare facilities, as well as to counsellors through SMS and hotline linkages.                                                                                                                                                                                                                                                                                                                                                                                                                                                             |                                                                |
| Bringing Back Mothers and Babies Kisaakye Linda, lkisaakye@gmail.com         | Uganda | 02/09/2019 | Aim is to improve retention in the PMTCT program, Users; Midwives, Records Persons; PMTCT program stakeholders, System was deployed to monitor monthly retention of HIV mothers and babies.                                                                                                                                                                                                                                                                                                                                                                                      | Health information system, Service delivery                    |
| DREAMS/OVC Juliet Cheptoris, julietcheptoris@gmail.com                       | Uganda | 16/06/2020 | Track services provided to AGYWs and OVCs , Traget users: AGYWs, CSOs, IPs,DCDOs, MOH, Development Partners.                                                                                                                                                                                                                                                                                                                                                                                                                                                                     | Health information system, Service delivery                    |
| Early Infant Diagnosis(EID) Dashboard Dr. Victor Bigira, vbigira@musph.ac.ug | Uganda | 16/06/2020 | openmrs                                                                                                                                                                                                                                                                                                                                                                                                                                                                                                                                                                          | Health information system, Service delivery                    |
| HiMap Mobile Application Jonathan Mpango, jmpango@musph.ac.ug                | Uganda | 16/06/2020 | Capture GIS coordinates of health facilities and district health offices                                                                                                                                                                                                                                                                                                                                                                                                                                                                                                         | Service delivery                                               |
| RxSolution Stephanie Xueref, smxueref@msh.org                                | Uganda | 09/01/2014 | RxSolution is an integrated computerized pharmaceutical management system used to support logistics and stock management of medicines and health supplies in public and private not for profit health facilities in Uganda. The system is used by facility stores personnel to manage medicines & health supplies inventory and is currently implemented in 250 higher level health facilities throughout the country. Plans are underway to link the system to the new national medical stores ERP to facilitate electronic ordering of commodities between facilities and NMS. | Access to medicines, vaccines and technology, Service delivery |



|                                                                             |               |                   |                                                                                                                                                                                                                                                                                                                                                                                                                                                                                                                                                                                                                                                                                                                                                                                                                                                               |                                                                       |
|-----------------------------------------------------------------------------|---------------|-------------------|---------------------------------------------------------------------------------------------------------------------------------------------------------------------------------------------------------------------------------------------------------------------------------------------------------------------------------------------------------------------------------------------------------------------------------------------------------------------------------------------------------------------------------------------------------------------------------------------------------------------------------------------------------------------------------------------------------------------------------------------------------------------------------------------------------------------------------------------------------------|-----------------------------------------------------------------------|
| <p>Pharmaceutical Information Portal Stephanie Xueref, smxueref@msh.org</p> | <p>Uganda</p> | <p>09/01/2014</p> | <p>The Pharmaceutical Information Portal (PIP) is a data warehouse and business intelligence system developed to provide strategic insights into the performance of the public sector medicines supply chain in Uganda. The system is designed to inform evidence based decision making and collects data from multiple sources such as RxSolution health facility inventory data, district medicines supervision, performance assessment and recognition strategy (SPARS) data, pharmaceutical financial management data and data on key commodities from central medical warehouses. Users of the system are supply chain managers at national and sub-national levels. A national emergency logistics management information system is currently being integrated within the PIP to inform pre-positioning of supplies for epidemic disease outbreaks.</p> | <p>Access to medicines, vaccines and technology, Service delivery</p> |
| <p>Option B+ Kisaakye Linda, lkisaakye@gmail.com</p>                        | <p>Uganda</p> | <p>09/12/2012</p> | <p>Aim is to monitor progress on the PMTCT program, Users; Midwives, Records Persons; PMTCT program stakeholders, System was to deployed weekly monitor the rollout and implementation of the Option B+ program.</p>                                                                                                                                                                                                                                                                                                                                                                                                                                                                                                                                                                                                                                          | <p>Health information system, Service delivery</p>                    |

|                                                                                                          |               |                   |                                                                                                                                                                                                                                                                                                                                                                                                                                                                                                                                                                                                                                                                                                                                                                                                                                                                                                                                                                                                                                          |                                                    |
|----------------------------------------------------------------------------------------------------------|---------------|-------------------|------------------------------------------------------------------------------------------------------------------------------------------------------------------------------------------------------------------------------------------------------------------------------------------------------------------------------------------------------------------------------------------------------------------------------------------------------------------------------------------------------------------------------------------------------------------------------------------------------------------------------------------------------------------------------------------------------------------------------------------------------------------------------------------------------------------------------------------------------------------------------------------------------------------------------------------------------------------------------------------------------------------------------------------|----------------------------------------------------|
| <p>integrated Human Resource Information System (iHRIS) Ismail Wadembere, iwadembere@intrahealth.org</p> | <p>Uganda</p> | <p>16/06/2020</p> | <p>A strong human resources information system (HRIS) enables leaders to quickly answer the key policy and management questions affecting Service delivery. The integrated Human Resource Information System (iHRIS) suite, a free Open Source HRIS is management tool to supply leaders with the information they need to assess HR problems, plan effective interventions and evaluate those interventions. It is a computerized Human Resources management tool consisting of electronic databases for storing, reporting, and analyzing data from the time professionals enter pre-service training to when they leave the workforce to ensure timely availability of accurate information for policy, planning and management. The iHRIS suite consist of iHRIS Plan designed to support the key HRH functions of planning; iHRIS Train to support pre and in-service training; iHRIS Qualify for regulation of registration and licensure; iHRIS Manage for management and iHRIS Retain for retention of the health workforce.</p> | <p>Human resources for health</p>                  |
| <p>Smart Hospital Information System (SmartHIS) Dr Simon Ndira, simon.ndira@compelling.works</p>         | <p>Uganda</p> | <p>16/06/2020</p> | <p>SmartHIS is an integrated hospital information system, a revival of the eHMIS project that was tested in Tororo District Hospital as part of a research project in 2004. The aim is to come up with a free light-weight hospital information system covering all processes in a hospital</p>                                                                                                                                                                                                                                                                                                                                                                                                                                                                                                                                                                                                                                                                                                                                          | <p>Service delivery, Health Informaiton system</p> |

|                                                                                    |        |            |                                                                                                                                                                                                                                                                                                                                                                                                                                                                                                                                                                                                                                                                                                                                                                                                                                   |                                                                |
|------------------------------------------------------------------------------------|--------|------------|-----------------------------------------------------------------------------------------------------------------------------------------------------------------------------------------------------------------------------------------------------------------------------------------------------------------------------------------------------------------------------------------------------------------------------------------------------------------------------------------------------------------------------------------------------------------------------------------------------------------------------------------------------------------------------------------------------------------------------------------------------------------------------------------------------------------------------------|----------------------------------------------------------------|
| Performance Tracking App for CHW Supervisors Simon Mutama, smutama@livinggoods.org | Uganda | 18/09/2015 | The LG Performance Tracker App for CHW Supervisors is an Android application with functionality for monitoring the performance of CHWs enrolled with LG and actively using the LG Smart-Health App. Supervisors have access to the performance metrics of the CHWs garnered through the LG Smart-Health Application and are able to record their own observations of CHW behaviour, activity and aptitude to paint a complete picture of performance of any given CHW. Within the Performance Tracking app, a supervisor has access to and can update information on CHW Stock status, Aptitude on conducting Sick Child assessments, Pregnancy Registration and Follow-ups, Newborn health checks and House Hold Registrations and interactions. The app also access the CHWs competence with conducting public health education | Service delivery, Health information system                    |
| mTrac Uganda Carol Kyoziira, ckyozira@gmail.com                                    | Uganda | 11/05/2020 | Medicines Mobile Tracking                                                                                                                                                                                                                                                                                                                                                                                                                                                                                                                                                                                                                                                                                                                                                                                                         | Service delviery, Access to medicines, vaccines and technology |
| Strategic Information Mobile Apllication Jonathan Mpango, vbigira@musph.ac.ug      | Uganda | 10/01/2013 | Track and monitor the implementation of the national Option B+ program                                                                                                                                                                                                                                                                                                                                                                                                                                                                                                                                                                                                                                                                                                                                                            | Health information system                                      |
| Viral Load Dashboard Dr. Victor Bigira, vbigira@musph.ac.ug                        | Uganda | 08/04/2014 | To track the 90-90-90 at National, District, Hub & facility. Also tracking of an individual patient is on                                                                                                                                                                                                                                                                                                                                                                                                                                                                                                                                                                                                                                                                                                                         | Health information system                                      |

|                                                                 |        |            |                                                                                                                                                                                                                                                                                                                                                                                                                                                                                                                                                                                                                                                                                                                                                                                                                                                                                                                                                                                                                                    |                                             |
|-----------------------------------------------------------------|--------|------------|------------------------------------------------------------------------------------------------------------------------------------------------------------------------------------------------------------------------------------------------------------------------------------------------------------------------------------------------------------------------------------------------------------------------------------------------------------------------------------------------------------------------------------------------------------------------------------------------------------------------------------------------------------------------------------------------------------------------------------------------------------------------------------------------------------------------------------------------------------------------------------------------------------------------------------------------------------------------------------------------------------------------------------|---------------------------------------------|
| FamilyConnect Dr. Jesca Nsungwa Sabiiti,<br>jnsabiiti@gmail.com | Uganda | 16/06/2020 | FamilyConnect is an SMS and USSD tool which is being rolled out to support the implementation of the Key Family Care Practices and the new WHO ANC model, improving health, sanitation, nutrition and other practices, as well as health seeking behaviour, among pregnant and lactating mothers. The tool enrolls VHTs to register pregnant women and women of reproductive age (15-49). Midwives and nurses can also be enrolled to register women. MoH through the Community Health department is also designing FamilyConnect to support Catchment Area Mapping, Planning and Action (CAPA) with VHT SMS reporting on HMIS097. Under FamilyConnect-EMTCT module, pregnant HIV positive mothers are registered by health workers to get PMTCT messages and appointment reminders. The FamilyConnect-NCD module targets patients with heart failure. The patients are registered by health workers to be able to input their heart failure symptoms for tailored advice in form of SMS as well as feedback on when to seek care. | Health information system, Service delivery |
| NTD LF pre-TAS and TAS survey Clara Burgert, cburgert@rti.org   | Uganda | 01/06/2017 | Use of Secure Data Kit platform to collect disease prevalence survey information for LF pre-TAS and TAS surveys.                                                                                                                                                                                                                                                                                                                                                                                                                                                                                                                                                                                                                                                                                                                                                                                                                                                                                                                   | Health information system                   |
| Stre@mline Samuel Mugisha,<br>samuel@streamlinehealth.org       | Uganda | 10/04/2014 | Stre@mline is an e-health platform that enables clinicians in resource poor settings to deliver health care efficiently by providing key patient safety prompts across the entire patient journey. Stre@mline follows the patient journey incorporating demographics, triage, consultation, patient safety, investigation ordering and results, prescriptions, stock control of medicines, insurance, finances and with the ability to generate statistical data needed for monthly government Health Management Information System reports (HMIS), graphical trend data, etc.                                                                                                                                                                                                                                                                                                                                                                                                                                                     | Service delivery, Health information system |

|                                                                         |        |            |                                                                                                                                                                                                                                                                                                                                                                                                                                                                                                                                                                                                                                                                                                                                                                                                        |                                             |
|-------------------------------------------------------------------------|--------|------------|--------------------------------------------------------------------------------------------------------------------------------------------------------------------------------------------------------------------------------------------------------------------------------------------------------------------------------------------------------------------------------------------------------------------------------------------------------------------------------------------------------------------------------------------------------------------------------------------------------------------------------------------------------------------------------------------------------------------------------------------------------------------------------------------------------|---------------------------------------------|
| Open Client Registry Wayan Vota, wvota@intrahealth.org                  | Uganda | 20/08/2019 | IntraHealth developed OpenCR, a prototypical open source client registry with USAID funding through MEASURE Evaluation. Client information is distributed across multiple Health information systems (facilities, pharmacies, lab systems, etc.). OpenCR was designed to uniquely identify individuals who have records in multiple information systems to help countries track patients through the continuum of care. Development was informed by stakeholders in Uganda, including the Ministry of Health (MOH) and the Central Public Health Laboratory (CPHL), as well as technical teams at CDC and USAID. OpenCR was built to support epidemic control by facilitating the deduplication of patients' lab test results for tracking outcomes over time and identifying those lost to follow up. | Health information system, Service delivery |
| DHIS2 for COVID-19 Surveillance: Uganda Rebecca Potter, covid@dhis2.org | Uganda | 08/05/2020 | The DHIS2 digital data package for COVID-19 is designed to accelerate case detection, situation reporting, active surveillance and response in countries. The COVID-19 digital data package includes standard metadata aligned with the WHO's technical guidance on COVID-19 surveillance and has been adapted to local country context and language in this implementation.                                                                                                                                                                                                                                                                                                                                                                                                                           | Health information system                   |
| USAID RHITES-N, Lango Med Makumbi, med_makumbi@ug.jsi.com               | Uganda | 04/11/2020 | Digital platforms used for targeted client communication including reminders for health facility appointments for ANC, eMTCT, VMMC & PLHIV. Health information dissemination via mobile SMS on program thematic areas and Toll free hotline and WhatsApp platforms for remote consultations.                                                                                                                                                                                                                                                                                                                                                                                                                                                                                                           | Service delivery                            |

|                                                                           |               |                   |                                                                                                                                                                                                                                                                                                                                                                                                                                                                                                                                                                                                                                                                                                                                                                                                                                                                                                                                                                                                                                                                                                                                                                                                                                                                                                                                                                                                                                                                                                                                                                                                                                                                                                                                |                         |
|---------------------------------------------------------------------------|---------------|-------------------|--------------------------------------------------------------------------------------------------------------------------------------------------------------------------------------------------------------------------------------------------------------------------------------------------------------------------------------------------------------------------------------------------------------------------------------------------------------------------------------------------------------------------------------------------------------------------------------------------------------------------------------------------------------------------------------------------------------------------------------------------------------------------------------------------------------------------------------------------------------------------------------------------------------------------------------------------------------------------------------------------------------------------------------------------------------------------------------------------------------------------------------------------------------------------------------------------------------------------------------------------------------------------------------------------------------------------------------------------------------------------------------------------------------------------------------------------------------------------------------------------------------------------------------------------------------------------------------------------------------------------------------------------------------------------------------------------------------------------------|-------------------------|
| <p>Pfizer Project Bugiri Elisha Nangosha,<br/>elisha_nangosha@wvi.org</p> | <p>Uganda</p> | <p>01/04/2020</p> | <p>By increasing uptake of curative and preventive interventions, Pfizer Project Bugiri's goal is to reduce mortality among children under 5 from common childhood illnesses in Uganda's Bugiri district. To accomplish this, the project is focused on achieving three outcomes: improved demand for and uptake of community-based child health services; strengthened systems and structures that support child health interventions, including the supply chain and strengthened child health information. Trained village health teams (VHTs) address care-seeking behaviours of local child caretakers to increase demand for community health services. VHTs also influence social norms through faith and community leaders and by employing a socially accountable community engagement strategy. The project focuses on supportive supervision and on-site video distance learning using open-source content furnished by ORB. VHTs and health workers gain skills that they need to successfully implement and support Integrated Community Case Management, including at level II health facilities where Integrated Management of Newborn and Childhood Illness is provided. These service-quality enhancements reinforce child healthcare systems. Additionally, the project focuses on improved use of health information and supply chain management systems by enabling the tracking of medications and materials/equipment used. VHTs use CommCare to implement, track and store information about treatment outreach and supplies. The data supports and informs healthcare decision-making at all levels by also integrating with the government's existing District Health information system (DHIS2).</p> | <p>Service delivery</p> |
|---------------------------------------------------------------------------|---------------|-------------------|--------------------------------------------------------------------------------------------------------------------------------------------------------------------------------------------------------------------------------------------------------------------------------------------------------------------------------------------------------------------------------------------------------------------------------------------------------------------------------------------------------------------------------------------------------------------------------------------------------------------------------------------------------------------------------------------------------------------------------------------------------------------------------------------------------------------------------------------------------------------------------------------------------------------------------------------------------------------------------------------------------------------------------------------------------------------------------------------------------------------------------------------------------------------------------------------------------------------------------------------------------------------------------------------------------------------------------------------------------------------------------------------------------------------------------------------------------------------------------------------------------------------------------------------------------------------------------------------------------------------------------------------------------------------------------------------------------------------------------|-------------------------|

|                                                                                                              |               |                   |                                                                                                                                                                                                                                                                                                                                                                                                                                                                                                                                                                                                                                                                                                                                                                                                                                                                                                                                                                                                                      |                                                                       |
|--------------------------------------------------------------------------------------------------------------|---------------|-------------------|----------------------------------------------------------------------------------------------------------------------------------------------------------------------------------------------------------------------------------------------------------------------------------------------------------------------------------------------------------------------------------------------------------------------------------------------------------------------------------------------------------------------------------------------------------------------------------------------------------------------------------------------------------------------------------------------------------------------------------------------------------------------------------------------------------------------------------------------------------------------------------------------------------------------------------------------------------------------------------------------------------------------|-----------------------------------------------------------------------|
| <p>Buikwe Maternal Newborn and Child Health (B-MNCH) Project Angella Akolla, angella_akolla@wvi.org</p>      | <p>Uganda</p> | <p>01/04/2019</p> | <p>B-MNCH works to improve maternal, newborn and child health in Uganda's Buikwe district by 2021. To achieve this, it is improving and integrating household access and utilisation of MNCH services at both the community and facility levels. B-MNCH uses behaviour change communication, capacity building, empowerment of local health committees and social accountability to encourage and facilitate change among boys and girls ages 0–5 and men and women ages 15–49. District-wide community health workers' (CHW) use of CommCare helps them to effectively follow up and deliver counselling messages to households with pregnant and lactating mothers. Data utilisation is increased even further by health facilities using both CommCare and DHIS2. Supported by World Vision Hong Kong and collaborating with multiple stakeholders at the local and national levels, B-MNCH is in the process of scaling up so that it can help influence other communities to enact these same improvements.</p> | <p>Service delivery, Health information system</p>                    |
| <p>Kampala Emergency Digital Emergency System Douglas Akii Bua, dbua@psiug.org</p>                           | <p>Uganda</p> | <p>22/03/2021</p> | <p>To test innovative approaches to address the demand and supply side barriers affecting care seeking, effective referral and provision of quality care equitably for better maternal and newborn health in slum settings in Kampala</p>                                                                                                                                                                                                                                                                                                                                                                                                                                                                                                                                                                                                                                                                                                                                                                            | <p>Service delivery</p>                                               |
| <p>Electronic Inventory Management Services System (e-IMSS) Cliton Chikwata, clinton.chikwata@tmcg.co.ug</p> | <p>Uganda</p> | <p>01/08/2020</p> | <p>An electronic management inventory services system that is accessed online by a facility and allows for</p> <ul style="list-style-type: none"> <li>a. Inventory management for the health facility</li> <li>b. Facilitates warehouse-to-site supply distribution between health facilities</li> <li>c. Ability to manage individualized purchases/orders</li> <li>d. Caters for API integration with other electronic management records systems and online eShop platforms</li> <li>e. Ability to generate sales reports</li> </ul>                                                                                                                                                                                                                                                                                                                                                                                                                                                                              | <p>Access to medicines, vaccines and technology, Service delivery</p> |

|                                                                                                          |               |                   |                                                                                                                                                                                                                                                                                                                                                                                                                                                                                                                                                                                                                                                                                                                                                                                                                                                                                                                                                                                                                                                                                                                                                                                                                                                                                                                                                                                                                                                                                                                                                                                                                                                                                                                                                           |                                                    |
|----------------------------------------------------------------------------------------------------------|---------------|-------------------|-----------------------------------------------------------------------------------------------------------------------------------------------------------------------------------------------------------------------------------------------------------------------------------------------------------------------------------------------------------------------------------------------------------------------------------------------------------------------------------------------------------------------------------------------------------------------------------------------------------------------------------------------------------------------------------------------------------------------------------------------------------------------------------------------------------------------------------------------------------------------------------------------------------------------------------------------------------------------------------------------------------------------------------------------------------------------------------------------------------------------------------------------------------------------------------------------------------------------------------------------------------------------------------------------------------------------------------------------------------------------------------------------------------------------------------------------------------------------------------------------------------------------------------------------------------------------------------------------------------------------------------------------------------------------------------------------------------------------------------------------------------|----------------------------------------------------|
| <p>Public Health Open Community Mapping<br/>Kiggudde<br/>deogratias@mapuganda.org</p> <p>Deogratius,</p> | <p>Uganda</p> | <p>11/12/2019</p> | <p>OpenStreetMap Uganda (OSM Uganda) in collaboration with Humanitarian OpenStreetMap Team (HOT) in an effort to improve patient tracing in rural Uganda decided to develop community landmark maps and gazetteers to assist community health workers easily navigating to patients as well as facility-based health workers to trace origins of their patients. OSM Uganda deployed the community system based on learning from previous public health outbreaks of cholera where some of the facility-based health workers had difficulty in tracing the origin of their patients and in turn made it difficult to identify the source of the outbreak. Using the OpenStreetMap remote editing tools, OSM Uganda in collaboration with HOT remote mapped all the buildings, roads, and place names in Kisoro and Zombo districts. Community health workers were then trained on how to use maps.me and OSM and to map and share locations all community landmark features that assist one to navigate to a community. Using QGIS, community landmark maps and gazetteers were developed and shared to all community health workers to use to navigate between communities and for facility-based workers to trace the origins of their patients. In the future we would like to integrate the information collected from the field with the DHIS2 platform with the department of health information at the Ministry of Health. Using OSM overpass turbo API the team would build live link with the DHIS2 platform that will allow district and national stakeholders overlay community data collected uploaded to OpenStreetMap with health data to get a much deeper insight to how to effectively plan and execute public health interventions.</p> | <p>Service delivery, Health information system</p> |
|----------------------------------------------------------------------------------------------------------|---------------|-------------------|-----------------------------------------------------------------------------------------------------------------------------------------------------------------------------------------------------------------------------------------------------------------------------------------------------------------------------------------------------------------------------------------------------------------------------------------------------------------------------------------------------------------------------------------------------------------------------------------------------------------------------------------------------------------------------------------------------------------------------------------------------------------------------------------------------------------------------------------------------------------------------------------------------------------------------------------------------------------------------------------------------------------------------------------------------------------------------------------------------------------------------------------------------------------------------------------------------------------------------------------------------------------------------------------------------------------------------------------------------------------------------------------------------------------------------------------------------------------------------------------------------------------------------------------------------------------------------------------------------------------------------------------------------------------------------------------------------------------------------------------------------------|----------------------------------------------------|



|                                                                                       |                             |            |                                                                                                                                                                                                                                                                                                                                                                                                                                                                                                         |                                                              |
|---------------------------------------------------------------------------------------|-----------------------------|------------|---------------------------------------------------------------------------------------------------------------------------------------------------------------------------------------------------------------------------------------------------------------------------------------------------------------------------------------------------------------------------------------------------------------------------------------------------------------------------------------------------------|--------------------------------------------------------------|
| OpenONCIMS Dr Wasswa William,<br>williamwasswa036@gmail.com                           | Uganda                      | 01/11/2019 | OpenONCIMS is an Integrated Oncology Information Management system that leverages Data Science and AI for the improvement of cancer diagnosis and management in resource-constrained areas.                                                                                                                                                                                                                                                                                                             | Service delivery                                             |
| Vaccine Information Management System (VIMS) Ssanyu Nyinondi,<br>snyinondi@tz.jsi.com | United Republic of Tanzania | 09/01/2018 | Tanzania's Vaccine Information Management System (VIMS) combines vaccine data management, stock management and cold chain equipment inventory management into one tool that facilitates monitoring and improving immunization program performance. The prior system used the district vaccine data management tool (DVDMT), stock management tool (SMT) and cold chain equipment inventory management tool (CCEIT)                                                                                      | Service delivery, Access to medicine, vaccine and Technology |
| Health Information Mediator Ssanyu Nyinondi, ssanyu_nyinondi@jsi.com                  | United Republic of Tanzania | 09/01/2018 | This "middleware" in the Tanzania Health Information Architecture enables data exchange from/between 9 Health information systems from 5 national and specialized hospitals and legacy systems through an interoperability layer (JEEVA, MedPro and Care2x, eLMIS, DHIS2, VIMS, HRHIS, HFR and EPICOR 9)                                                                                                                                                                                                | Health information system                                    |
| Safer Deliveries Rachel Hofmann,<br>rhofmann@d-tree.org                               | United Republic of Tanzania | 07/05/2015 | The Safer Deliveries program equips community health volunteers (CHVs) with digital tools to promote maternal and newborn health. CHVs use a mobile application to guide them in assisting families to plan for facility deliveries and counsel, screen, and refer pregnant women, newborns, and postpartum women to facilities if needed. The program also builds the capacity of the Ministry of Health to utilize program data, generated as a by-product of CHV visits, to improve decision-making. | Service delivery                                             |

|                                                                                                                                      |                                    |                   |                                                                                                                                                                                                                                                                                                                                                                                                                                                                                                                                                                                                                                                                                                                                                                                                                                                                                                                                                                                                            |                                                    |
|--------------------------------------------------------------------------------------------------------------------------------------|------------------------------------|-------------------|------------------------------------------------------------------------------------------------------------------------------------------------------------------------------------------------------------------------------------------------------------------------------------------------------------------------------------------------------------------------------------------------------------------------------------------------------------------------------------------------------------------------------------------------------------------------------------------------------------------------------------------------------------------------------------------------------------------------------------------------------------------------------------------------------------------------------------------------------------------------------------------------------------------------------------------------------------------------------------------------------------|----------------------------------------------------|
| <p>Mobilizing Maternal Health (MMH) Gloria Kahamba, gkahamba@d-tree.org</p>                                                          | <p>United Republic of Tanzania</p> | <p>15/08/2014</p> | <p>A dispatch center with a 24-hour toll-free emergency line and an emergency referral system. The system uses ambulances and community drivers with payments automatically sent through mobile money. A mobile application supports dispatchers to determine maternal and neonatal emergencies and arrange transport to the most appropriate facility. The system reimburses women to travel to a maternity waiting hotel before delivery, and Community Health Workers support women through pregnancy and the postpartum period.</p>                                                                                                                                                                                                                                                                                                                                                                                                                                                                    | <p>Service delivery</p>                            |
| <p>Community Family Planning and Model Household Systems; Population Health Environment (PHE) Rebecca Litner, rlitner@d-tree.org</p> | <p>United Republic of Tanzania</p> | <p>01/10/2017</p> | <p>Community-based family planning and model household systems to support population, health and environment initiatives. The family planning system empowers both community health workers and supervisors in the facility, and was developed based on Balanced Counseling Strategy plus (BCS +) guidelines. Community health workers use a mobile application to evaluate family planning needs of clients and distribute or refer for methods. Supervisors in the facility use a mobile application to follow up with community health workers and also evaluate and communicate about method stock at the facility. The family planning system is integrated with Pathfinder's DHIS to automate reporting activities. The Model Household system is used by Population Health and Environment (PHE) champions, who evaluate households based on 75 criteria. PHE champions then identify weak areas and establish action items with the health workers, and track household improvement over time.</p> | <p>Service delivery, Health information system</p> |

|                                                                                                                                               |                             |            |                                                                                                                                                                                                                                                                                                                                                                                                                                                                                                           |                                             |
|-----------------------------------------------------------------------------------------------------------------------------------------------|-----------------------------|------------|-----------------------------------------------------------------------------------------------------------------------------------------------------------------------------------------------------------------------------------------------------------------------------------------------------------------------------------------------------------------------------------------------------------------------------------------------------------------------------------------------------------|---------------------------------------------|
| Sauti- HIV Prevention Program Gloria Kahamba, gkahamba@d-tree.org                                                                             | United Republic of Tanzania | 29/11/2015 | HIV prevention program targeting key and vulnerable populations. Decision support tools guide (i) counselors at mobile clinics to conduct risk assessment; HIV testing and counseling; and STI, TB, and GBV screening and (ii) peer educators to conduct behavioral change communication sessions and financial education in communities. Clients are tracked with a unique QR code, given upon registration and referral. The system provides quality data reporting and program monitoring.             | Service delivery, Health information system |
| Family Planning Digital Health System for Community Health Workers- Mara Region with Shirati KMT Hospital Gloria Kahamba, gkahamba@d-tree.org | United Republic of Tanzania | 01/07/2017 | Community-based family planning (FP) application with algorithm that supports Community Health Workers (CHWs) providing FP services in the community, following the Balanced Counseling Strategy Plus and Tanzania guidelines. The system includes comprehensive dashboards, summarizing key program indicators and government reports, for program managers to monitor and use real-time data for decision making.                                                                                       | Health information system                   |
| MCSP Facility and Community MCH application Steve Ollis, Steve.ollis@mcsprogram.org                                                           | United Republic of Tanzania | 01/01/2016 | Facility based decision support tool for use by health workers providing MNCH services and CHW decision support tool for community level workers providing MNCH services at the household level                                                                                                                                                                                                                                                                                                           | Service delivery                            |
| BID INITIATIVE Hassan Mtenga, Laurie Warner, hmtenga@path.org                                                                                 | United Republic of Tanzania | 01/05/2014 | Patient-level-information-system developed to track children immunization appointment and history, and their well-being from birth through under five as well as track vaccine stock utilization and management. The solution is responding to critical challenges namely, incomplete or untimely reporting, inaccurate target population and lack of unique identifiers of infants to account for continuum of care and complexity of data tools. The solution is deployed in primary health care level. | Service delivery, Health information system |

|                                                                                                                                              |                             |            |                                                                                                                                                                                                                                                                                                                                                                                                                                                                                                                            |                   |
|----------------------------------------------------------------------------------------------------------------------------------------------|-----------------------------|------------|----------------------------------------------------------------------------------------------------------------------------------------------------------------------------------------------------------------------------------------------------------------------------------------------------------------------------------------------------------------------------------------------------------------------------------------------------------------------------------------------------------------------------|-------------------|
| Non-discriminating access for Digital Inclusion (DigI) Christine Holst, christine.holst@medisin.uio.no                                       | United Republic of Tanzania | 01/01/2017 | Non-Discriminating Access for Digital Inclusion (DigI) is a multi-disciplinary innovation project funded by the Norwegian Research Council and The Norwegian Ministry for Foreign Affairs. This pilot project aims to install small hotspots in rural Tanzania with a Wi-Fi (50 meter radius), providing free access to an “Internet lite”-version and high quality basic health information, via fixed tablets or clients smartphones.                                                                                    | Service delivery  |
| MNCH mobile content with nutrition focus, available in Kiswahili and English in SMS and voice transcript format Mojca Cargo, mcargo@gsma.com | United Republic of Tanzania | 02/09/2013 | The GSMA, together with its global content consortium lead by CABI, developed open-source nutrition and MNCH mobile ready content for Tanzania available in Kiswahili and English. All content was produced by in-country specialists and is based on recommended MNCH and local nutrition practices. The Tanzania Food and Nutrition Centre (TNFC) played a vital role in the development and content validation. The Content is available in the form of: topic-specific factsheets, SMSs and voice message transcripts. | Service delivery  |
| The Safe Delivery App- Tanzania Helena Lassen, helena@maternity.dk                                                                           | United Republic of Tanzania | 15/06/2015 | IFAKARA implemented the App in partnership with and Bluetown in Dodoma. The App was reviewed and approved by the MoH and is available in this aligned version, with plans for a Swahili version in the works. In October 2018 MF held a Safe Delivery App training in Arusha where 19 nurses and midwives from 8 different hospitals in Arusha participated in a 3-day training.                                                                                                                                           | Service delivery, |

|                                                                                                                                                                                            |                                    |                   |                                                                                                                                                                                                                                                                                                                                                                                                                                                                                                                                                                                                                                                                                                                                                                                                                                                                           |                                                    |
|--------------------------------------------------------------------------------------------------------------------------------------------------------------------------------------------|------------------------------------|-------------------|---------------------------------------------------------------------------------------------------------------------------------------------------------------------------------------------------------------------------------------------------------------------------------------------------------------------------------------------------------------------------------------------------------------------------------------------------------------------------------------------------------------------------------------------------------------------------------------------------------------------------------------------------------------------------------------------------------------------------------------------------------------------------------------------------------------------------------------------------------------------------|----------------------------------------------------|
| <p>USAID BORESHA AFYA -COMMUNITY Health information system ENCOMPASSING OPEN SMART REGISTER PLATFORM, CLOSED USER GROUP &amp; ELEARNING Dunstan Bishanga, Dunstan.Bishanga@jhpiego.org</p> | <p>United Republic of Tanzania</p> | <p>01/10/2017</p> | <p>USAID Boresha Afya Lake and Western Zone is a five-year project implemented in seven regions of Tanzania Mainland and Zanzibar. The goal of the project is to improve the health status of all Tanzanians - with a focus on women, youth and children - by improving the availability of, and access to, quality, respectful and integrated health services. The project is implemented by a consortium of three partners, led by Jhpiego, an affiliate of Johns Hopkins University. The other partners are EngenderHealth and PATH. The project digital health component includes Digital Learning to improve performance of Healthcare providers, Emergency Transport and referral system to improve maternal survival, OpenSRP maintains client data, automates healthcare and provides a foundation for the continuum of care and GIS for Operational Planning</p> | <p>Service delivery, Health information system</p> |
| <p>SAUTI PROJECT-KVP MOBILE DATA COLLECTION SYSTEM Dr Albert Komba, Albert.Komba@jhpiego.org</p>                                                                                           | <p>United Republic of Tanzania</p> | <p>01/10/2015</p> | <p>Funded by the U.S. President's Emergency Plan for AIDS Relief through the U.S. Agency for International Development, Sauti Project is working in partnership with the Tanzanian Ministry of Health, Community Development, Gender, Elderly and Children to bring community-based HIV and reproductive health services close to key and vulnerable populations (KVPs) in 12 regions. The populations reached by Sauti Project include KVPs as well as other Tanzanians disproportionately affected by HIV. The Sauti project digital health component include mobile data collection for access and efficiency increase</p>                                                                                                                                                                                                                                             | <p>Service delivery, Health information system</p> |
| <p>Clinical Monitoring System for Preservice Trainees-More and Better Midwives for Rural Tanzania Project Dr Julius Masanika, Julius.Masanika@jhpiego.org</p>                              | <p>United Republic of Tanzania</p> | <p>01/10/2017</p> | <p>Commcare based Clinical Monitoring System for Preservice Trainees</p>                                                                                                                                                                                                                                                                                                                                                                                                                                                                                                                                                                                                                                                                                                                                                                                                  | <p>Service delivery</p>                            |

|                                                                                                                           |                             |            |                                                                                                                                                                                                                                                                                                                                                                                                                                                                                                                                                                                                                                                                                                                                                                                                                                                                                                                                                                                    |                                              |
|---------------------------------------------------------------------------------------------------------------------------|-----------------------------|------------|------------------------------------------------------------------------------------------------------------------------------------------------------------------------------------------------------------------------------------------------------------------------------------------------------------------------------------------------------------------------------------------------------------------------------------------------------------------------------------------------------------------------------------------------------------------------------------------------------------------------------------------------------------------------------------------------------------------------------------------------------------------------------------------------------------------------------------------------------------------------------------------------------------------------------------------------------------------------------------|----------------------------------------------|
| Family Planning Digital Health System for Community Health Workers - Shinyanga Region Gloria Kahamba, gkahamba@d-tree.org | United Republic of Tanzania | 01/01/2014 | Community-based family planning program which support CHWs providing FP services in the community, following the Balanced Counseling Strategy Plus and Tanzania guidelines. Comprehensive dashboards, including government reports, discontinuation tracking and other indicators are available. CHW supervisors have a mobile app which allows them to send messages to CHWs about outreach events and method stock levels.                                                                                                                                                                                                                                                                                                                                                                                                                                                                                                                                                       | Service delivery, Health information system  |
| Rheumatic Heart Disease and Hypertension Tracking Stefanie Kot, skot@d-tree.org                                           | United Republic of Tanzania | 01/03/2019 | The hypertension tracking system has three key project objectives: 1) improve the health status of the existing facility-based health workforce as well as quality of patient care for hypertensive disorders through education and health promotion programs; 2) improve access to services for hypertensive disorders (including preeclampsia) across the continuum of care for pregnant and postpartum women as well as other patient populations; and 3) measure the cost effectiveness and health impact of a health workforce approach to hypertension prevention, management, and control. One track of the program focuses on providing services to HCWs. They will be screened at HCW fairs and enrolled into peer-to-peer support groups. The second track of program focuses on pregnant women. They will be screened during ANC and PNC visits in 21 Healthcare Facilities. There are plans to integrate Rheumatic Heart Disease tracking in the system in the future. | Service delivery, Human resources for health |
| Shang Ring Electronic Data Collection Alice Christensen, alice.christensen@jhpiego.org                                    | United Republic of Tanzania | 01/06/2018 | Health providers have been given tablets with ODK installed, which they use to collect data electronically. The ODK App has an offline capability which help in centralizing electronic data collection even in places with limited internet connectivity.                                                                                                                                                                                                                                                                                                                                                                                                                                                                                                                                                                                                                                                                                                                         | Health information system                    |

|                                                                                                                                                                                                                   |                                    |                   |                                                                                                                                                                                                                                                                                                                                                                                                                                                                                                                                                                                                                                                                                                                                                                                                                                                                                                                                                                                                                                                                      |                                                                       |
|-------------------------------------------------------------------------------------------------------------------------------------------------------------------------------------------------------------------|------------------------------------|-------------------|----------------------------------------------------------------------------------------------------------------------------------------------------------------------------------------------------------------------------------------------------------------------------------------------------------------------------------------------------------------------------------------------------------------------------------------------------------------------------------------------------------------------------------------------------------------------------------------------------------------------------------------------------------------------------------------------------------------------------------------------------------------------------------------------------------------------------------------------------------------------------------------------------------------------------------------------------------------------------------------------------------------------------------------------------------------------|-----------------------------------------------------------------------|
| <p>OpenLMIS Tanzania Rebecca Alban, Info@openlmis.org</p>                                                                                                                                                         | <p>United Republic of Tanzania</p> | <p>01/01/2013</p> | <p>In Tanzania, OpenLMIS provides end to end visibility of the supply chain for informed policy decision making – from national procurement planning to replenishing health facilities at the last mile. In 2015 the system was adapted to the needs of Zanzibar’s autonomous health system. For both Tanzania mainland and Zanzibar, all products ordered by health facilities from MSD (mainland) or Central Medical Stores (CMS, Zanzibar) except for vaccines are managed with eLMIS. Vaccines are managed through a parallel supply chain.</p>                                                                                                                                                                                                                                                                                                                                                                                                                                                                                                                  | <p>Access to medicines, vaccines and technology, Service delivery</p> |
| <p>DYNAMIC Prof. Valérie D'Acremont, head of digital and global health at Unisanté, Lausanne or Dr. Irene Masanja, senior scientist at Ifakara Health Institute, Dar es Salaam, valerie.dacremont@swisstph.ch</p> | <p>United Republic of Tanzania</p> | <p>01/04/2019</p> | <p>We aim to improve quality of care for ~1'200'000 children 0-12 years in 70 health facilities through implementing, validating (impact on clinical outcome and antimalarial/antibiotic use) and further improving ePOCT+, an innovative clinical decision support algorithm (CDSA) combined with point-of-care diagnostic tests. ePOCT+ builds on the validated ePOCT tool, but will contain additional modules for data visualization, e-learning, supervision and self-audit. ePOCT+ will evolve through artificial intelligence, adapting care to environmental changes; machine learning, combined with constant medical evaluation, will tailor algorithms in real time, improving response to outbreaks and generating reporting for informed planning and targeting of interventions by health authorities. We will develop a framework at local, district, and national level for the scale-up of CDSA, investigate facilitating and impeding factors and create specific IT tools to allow health authorities to create their own medical algorithms.</p> | <p>Service delivery</p>                                               |

|                                                                                                                                      |                                    |                   |                                                                                                                                                                                                                                                                                                                                                                                                                                                                                                                                                                                                                                                                                                                                 |                                  |
|--------------------------------------------------------------------------------------------------------------------------------------|------------------------------------|-------------------|---------------------------------------------------------------------------------------------------------------------------------------------------------------------------------------------------------------------------------------------------------------------------------------------------------------------------------------------------------------------------------------------------------------------------------------------------------------------------------------------------------------------------------------------------------------------------------------------------------------------------------------------------------------------------------------------------------------------------------|----------------------------------|
| <p>ARTIFICIAL INTELLIGENCE IN SOCIAL MEDIA DURING CORONA VIRUS DISEASE OUTBREAK. DEOGRATIAS MZURIKWAO, deogratias@xsenseai.co.tz</p> | <p>United Republic of Tanzania</p> | <p>24/04/2020</p> | <p>Social media has become the main source of news online with more than 2.4 billion internet users, nearly 64.5 per cent receive breaking news from social media sites like Facebook, Twitter, YouTube, Snapchat and Instagram instead of traditional media. According to a social media analytic company, Sprinklr, it counted a record nearly 20 million mentions of coronavirus-related terms on March 11 with the US alone. This shows how much social media contain potential data about the outbreak. We aim to create an AI algorithm which can extract and analyse social media data related to coronavirus from social media in Tanzania to start with and cover more countries, region, continent and go global.</p> | <p>Health information system</p> |
| <p>DHIS2 for COVID-19 Surveillance: Zanzibar (in development) Rebecca Potter, covid@dhis2.org</p>                                    | <p>United Republic of Tanzania</p> | <p>08/05/2020</p> | <p>The DHIS2 digital data package for COVID-19 is designed to accelerate case detection, situation reporting, active surveillance and response in countries. The COVID-19 digital data package includes standard metadata aligned with the WHO's technical guidance on COVID-19 surveillance and has been adapted to local country context and language in this implementation.</p>                                                                                                                                                                                                                                                                                                                                             | <p>Health information system</p> |



|                                                                                                                                                |                                    |                   |                                                                                                                                                                                                                                                                                                                                                                                                                                                                                                                                                                                                                                                                                                                                                                                                                                                                                                                                                                                                                                              |                                                    |
|------------------------------------------------------------------------------------------------------------------------------------------------|------------------------------------|-------------------|----------------------------------------------------------------------------------------------------------------------------------------------------------------------------------------------------------------------------------------------------------------------------------------------------------------------------------------------------------------------------------------------------------------------------------------------------------------------------------------------------------------------------------------------------------------------------------------------------------------------------------------------------------------------------------------------------------------------------------------------------------------------------------------------------------------------------------------------------------------------------------------------------------------------------------------------------------------------------------------------------------------------------------------------|----------------------------------------------------|
| <p>Jamii ni Afya Heiko Hornung, hhornung@d-tree.org</p>                                                                                        | <p>United Republic of Tanzania</p> | <p>01/06/2018</p> | <p>The MOH Zanzibar and D-tree are partnering to implement Jamii ni Afya and the program has been formally adopted by the MOH as part of its 2020-2025 National Community Health Strategy. The MOH Zanzibar is training and deploying digitally enabled CHVs nationwide to provide home-based care and counseling for women and children under five on early child development (ECD), nutrition, and reproductive, maternal, newborn and child health (RMNCH). The digital platform is the foundation of the CHV program and includes a smartphone app, dashboards, and data integration into MoH systems. The app serves as a client tracking and job aid tool for CHVs, with the secondary purpose of collecting data to feed the reporting health management information system (HMIS). Data collected for client visits are automatically synced and aggregated for use in program monitoring and the national information system. Additionally, supervisors at health facilities can monitor CHVs' performance based on indicators.</p> | <p>Service delivery, Health Information system</p> |
| <p>Afya-Tek: Digital referral and decision support system using biometrics across the continuum of care Rebecca Litner, Rlitner@d-tree.org</p> | <p>United Republic of Tanzania</p> | <p>16/07/2020</p> | <p>The Afya Tek program aims to improve coordination among providers in order to strengthen the primary care system and ensure quality care is accessible to all. Afya Tek is a digital care and referral system connecting ADDOs, Health Facilities, and Community Health Workers around maternal, child and adolescent health. The system enables comprehensive case management with decision support and referral tracking across the three providers to enable appropriate and timely follow up care.</p>                                                                                                                                                                                                                                                                                                                                                                                                                                                                                                                                | <p>Service delivery</p>                            |

|                                                                                                          |                                    |                   |                                                                                                                                                                                                                                                                                                                                                                                                                                                                                                                                                                                                                                                                                                                                                                                                                                                                                                                                                                                                                                                                                                                                                                                                                                                                                                                                                                                                                                                                                                                                                                                                                                                |                                                    |
|----------------------------------------------------------------------------------------------------------|------------------------------------|-------------------|------------------------------------------------------------------------------------------------------------------------------------------------------------------------------------------------------------------------------------------------------------------------------------------------------------------------------------------------------------------------------------------------------------------------------------------------------------------------------------------------------------------------------------------------------------------------------------------------------------------------------------------------------------------------------------------------------------------------------------------------------------------------------------------------------------------------------------------------------------------------------------------------------------------------------------------------------------------------------------------------------------------------------------------------------------------------------------------------------------------------------------------------------------------------------------------------------------------------------------------------------------------------------------------------------------------------------------------------------------------------------------------------------------------------------------------------------------------------------------------------------------------------------------------------------------------------------------------------------------------------------------------------|----------------------------------------------------|
| <p>Access to Infant and Maternal (AIM) Health Plus Tanzania Daudi Sosthen Gambo, daudi_gambo@wvi.org</p> | <p>United Republic of Tanzania</p> | <p>01/01/2019</p> | <p>With the support of Irish Aid, the AIM Health Plus project addresses the leading causes of maternal and neonatal mortality and improves young child survival and nutritional status across four countries in Africa. Promoting behaviour change at the household level has been the emphasis. In Tanzania, the AIM Health Plus project has included a digital health component since 2019. The project provides community health workers (CHWs) with smartphones equipped with a tailored version of Dimagi's CommCare software to use during their home visits. The application supports CHWs who are using the Timed and Targeted Counselling (ttC) approach to promote positive health and nutrition behaviour change among pregnant women and mothers or caregivers of children under 2. The application provides reminders to help CHWs to visit homes at the ideal time during pregnancy, infancy and childhood. It also supports CHWs as they conduct counselling sessions, including enabling them to submit community health data in near real time. This data is then used for managing CHW efforts, planning and decision-making. To boost acceptability of this digital health tool, local language audio clips are incorporated into the application. support acceptability of the solution by the CHWs and the target beneficiaries. This CommCare-supported digital health intervention in Tanzania is expected to improve the effectiveness of behaviour change communication delivered to women and caregivers of children under 2 as well as strengthen the health system through better use of community-level data.</p> | <p>Service delivery, Health information system</p> |
|----------------------------------------------------------------------------------------------------------|------------------------------------|-------------------|------------------------------------------------------------------------------------------------------------------------------------------------------------------------------------------------------------------------------------------------------------------------------------------------------------------------------------------------------------------------------------------------------------------------------------------------------------------------------------------------------------------------------------------------------------------------------------------------------------------------------------------------------------------------------------------------------------------------------------------------------------------------------------------------------------------------------------------------------------------------------------------------------------------------------------------------------------------------------------------------------------------------------------------------------------------------------------------------------------------------------------------------------------------------------------------------------------------------------------------------------------------------------------------------------------------------------------------------------------------------------------------------------------------------------------------------------------------------------------------------------------------------------------------------------------------------------------------------------------------------------------------------|----------------------------------------------------|

|                                                       |                                      |            |  |                    |
|-------------------------------------------------------|--------------------------------------|------------|--|--------------------|
| NIA<br>Juliana<br>Busasi,<br>juliannabusasi@gmail.com | United<br>Republic<br>Tanzania<br>of | 16/11/2021 |  | Healthcare finance |
|-------------------------------------------------------|--------------------------------------|------------|--|--------------------|

|                                                                 |                             |            |                                                                                                                                                                                                                                                                                                                                                                                                                                                                                                                                                         |                                                                |
|-----------------------------------------------------------------|-----------------------------|------------|---------------------------------------------------------------------------------------------------------------------------------------------------------------------------------------------------------------------------------------------------------------------------------------------------------------------------------------------------------------------------------------------------------------------------------------------------------------------------------------------------------------------------------------------------------|----------------------------------------------------------------|
| Smart Growth Diary Mwombeki Fabian,<br>info@fabstech.com        | United Republic of Tanzania | 01/01/2020 | Diary is a mobile solution that gives autonomy to caregivers and mothers. It follows their child's growth in real time; get instant dietary information and what the child would be required to eat in terms of diversity, frequency, and amount of food; remind important milestones in immunization, and clinics visits.                                                                                                                                                                                                                              | Service delivery                                               |
| AfyaIntelligence Harrison Mariki,<br>afyaintelligence@gmail.com | United Republic of Tanzania | 01/03/2021 | AfyaIntelligence is an intelligent chatbot integrated in common messaging platforms(WhatsApp, Telegram and Text) to support healthcare supply chains. By doing so offers centralized access key of insights and foresights through digital communication platforms that healthcare workers are already familiar with. AfyaIntelligence makes HMIS and LMIS more resilient to pandemics by extending access to data, tracking and analyzing data-use through Chatbot Analytics and Creating a pathway to layer in new interventions like ML Predictions. | Service delivery, Access to medicines, vaccines and technology |

|                                                                                                             |                                    |                   |                                                                                                                                                                                                                                                                                                                                                                                                                                                                                                                                                                                                                                                                                                                                                                                                                                                                                                                                                                                                                                                                                                                                                                                                                                                                                                                        |                                                    |
|-------------------------------------------------------------------------------------------------------------|------------------------------------|-------------------|------------------------------------------------------------------------------------------------------------------------------------------------------------------------------------------------------------------------------------------------------------------------------------------------------------------------------------------------------------------------------------------------------------------------------------------------------------------------------------------------------------------------------------------------------------------------------------------------------------------------------------------------------------------------------------------------------------------------------------------------------------------------------------------------------------------------------------------------------------------------------------------------------------------------------------------------------------------------------------------------------------------------------------------------------------------------------------------------------------------------------------------------------------------------------------------------------------------------------------------------------------------------------------------------------------------------|----------------------------------------------------|
| <p>Hyperlocal Geospatial Data for Improving Vaccination Campaigns Asha Mustapher, omdtanzania@gmail.com</p> | <p>United Republic of Tanzania</p> | <p>01/02/2022</p> | <p>The target beneficiaries in Dar es Salaam, Tanzania, are vulnerable individuals in local communities such as the elderly and those with underlying medical problems. Currently, Tanzania ranks almost at the bottom worldwide in terms of the percentage of the population to receive a dose of a Covid-19 vaccine. As of November 2021, we stand at 1.74% of the population vaccinated, according to data from the University of Oxford. Tanzania received around one million vaccines through Covid-19 Vaccines Global Access (COVAX), and another 500,000 Sinopharm vaccine doses as a donation from China—but this is for a population of over 60 million people.</p> <p>OpenMap Development Tanzania (OMDTZ) has a unique potential to be impactful in improving the efficiency and reach of the national vaccination campaign. This is because for the last five years we have built a strong team of geospatial experts and community mappers, who have conducted projects across Tanzania, and in particular in Dar es Salaam.</p> <p>We have worked with over 6500 community members, mapped over 11 million buildings, 10,000 kilometers of roads, and a host of other critical data within Dar es Salaam and Tanzania including the drainage system, community assets, and boundaries to name a few.</p> | <p>Service delivery, Health information system</p> |
|-------------------------------------------------------------------------------------------------------------|------------------------------------|-------------------|------------------------------------------------------------------------------------------------------------------------------------------------------------------------------------------------------------------------------------------------------------------------------------------------------------------------------------------------------------------------------------------------------------------------------------------------------------------------------------------------------------------------------------------------------------------------------------------------------------------------------------------------------------------------------------------------------------------------------------------------------------------------------------------------------------------------------------------------------------------------------------------------------------------------------------------------------------------------------------------------------------------------------------------------------------------------------------------------------------------------------------------------------------------------------------------------------------------------------------------------------------------------------------------------------------------------|----------------------------------------------------|

|                                                                                                                                                    |        |            |                                                                                                                                                                                                                                                                                                                                                                                                                                                                                                                                  |                                                                |
|----------------------------------------------------------------------------------------------------------------------------------------------------|--------|------------|----------------------------------------------------------------------------------------------------------------------------------------------------------------------------------------------------------------------------------------------------------------------------------------------------------------------------------------------------------------------------------------------------------------------------------------------------------------------------------------------------------------------------------|----------------------------------------------------------------|
| mSpray` Anne Martin, acmartin@akros.com                                                                                                            | Zambia | 01/07/2014 | mSpray is a field support and management tool for household-level interventions, used in indoor residual spraying. Spray operator teams use the geospatial, tablet based tool, to guide their teams in finding and capturing data on houses as they are sprayed. Data is available daily on dashboards for managers to review progress and adjust team planning as necessary; this data informed approach has been shown to reduce malaria cases and is in pilot phases for other malaria interventions.                         | Service delivery                                               |
| eLMIS Facility Edition (FE) Wendy Bomett, wendy_bomett@zm.jsi.com                                                                                  | Zambia | 01/06/2016 | eLMIS FE has recently been upgraded from a Java Swing based client server application to a web-based two tier application with a PostgreSQL database back-end. At each health facility implementation, it works on their local area network (LAN) to enable multiple user access to the same application. It supports off-line access to it from within the LAN, without having to use internet, since it is a local installation within the facility. It can produce a monthly report and requisition (R&R).                    | Access to medicines, vaccines and technology, Service delivery |
| MNCH mobile content with nutrition focus, available in Bemba, Nyanja and English in SMS and voice transcript format Kim Viljoen, kviljoen@gsma.com | Zambia | 01/09/2013 | The GSMA, together with its global content consortium lead by CABI, developed open-source nutrition and MNCH mobile ready content for Zambia available in Bemba, Nyanja and English. All content was produced by in-country specialists and is based on recommended MNCH and local nutrition practices. The National Food and Nutrition Commission (NFNC) played a vital role in the development and content validation. The Content is available in the form of: topic-specific factsheets, SMSs and voice message transcripts. | Service delivery                                               |

|                                                                                |        |            |                                                                                                                                                                                                                                                                                                                                                                                                                                                                                                                                                                                                  |                                             |
|--------------------------------------------------------------------------------|--------|------------|--------------------------------------------------------------------------------------------------------------------------------------------------------------------------------------------------------------------------------------------------------------------------------------------------------------------------------------------------------------------------------------------------------------------------------------------------------------------------------------------------------------------------------------------------------------------------------------------------|---------------------------------------------|
| ZEIR - Zambia Electronic Immunization Registry Laurie Werner, lwerner@path.org | Zambia | 31/12/2017 | As part of the BMFG Better Immunization Data (BID) Initiative. The MoH and PATH worked to implement OpenSRP for the Zambian Electronic Immunization Platform in Southern Province. This provides an easy to use app for nurses at facilities to register children, capture their immunization records and track growth monitoring. The application provides in app report, tally generation with the ability to feed aggregate reports to DHIS2. The platform was developed and supported by Ona and local in-country partner Blue Code who has taken over support for the platform for the MoH. | Health information system, Service delivery |
| Zambia health Analytics Platform (ZHAP) Kaluba Mataka, kaluba@zenysis.com      | Zambia | 14/01/2019 | Zenysis has been working with the Ministry of Health (MOH), the National Malaria Elimination Centre (NMEC) and Medical Stores Limited (MSL) to implement the Zambia health Analytics Platform (ZHAP). The project is centered around three main pillars: Monitoring closely the evolution and trends of malaria burden; making better logistics decision to reduce risks of over-stock, waste and stockout; and, monitoring the impact and effectiveness of malaria intervention packages.                                                                                                       | Service delivery, Health information system |
| OpenLMIS Zambia Rebecca Alban, Info@openlmis.org                               | Zambia | 01/01/2014 | OpenLMIS Zambia manages over 2,000 Service delivery points for ARV, HIV Testing, Essential Medicines and Labs with an additional stand alone offline facility edition in 319 high-volume Service delivery points.                                                                                                                                                                                                                                                                                                                                                                                | Service delivery                            |

|                                                                                                                                                                                              |               |                   |                                                                                                                                                                                                                                                                                                                                                                                                                                                                                                                                                                                                                                                                                                                                                                                                                                                                                                                                                                                                                                                                 |                                  |
|----------------------------------------------------------------------------------------------------------------------------------------------------------------------------------------------|---------------|-------------------|-----------------------------------------------------------------------------------------------------------------------------------------------------------------------------------------------------------------------------------------------------------------------------------------------------------------------------------------------------------------------------------------------------------------------------------------------------------------------------------------------------------------------------------------------------------------------------------------------------------------------------------------------------------------------------------------------------------------------------------------------------------------------------------------------------------------------------------------------------------------------------------------------------------------------------------------------------------------------------------------------------------------------------------------------------------------|----------------------------------|
| <p>DelphiCare: Clinical decision support for comprehensive, longitudinal care of HIV-exposed and infected children and adolescents<br/>Douglas Watson, MD,<br/>douglaswatsonmd@gmail.com</p> | <p>Zambia</p> | <p>03/02/2020</p> | <p>The University of Maryland, Baltimore; D-tree International; and Logiak, collaborating with the CDC and Zambian Ministry of Health, developed DelphiCare, an Android app enabling HCWs to provide longitudinal, expert-level management of HIV-exposed infants and -infected children. DelphiCare monitors the mother; screens for illness; recommends tests and interprets results; screens for TB and guides TB treatment, recommends drugs and dosages; guides counseling on adherence, disclosure, and nutrition; and recommends follow-up. The app is a unique advance in several respects: (a) the level of complexity and long-term dimension of the clinical condition; (b) its comprehensiveness, constituting both a clinical decision support system and an electronic client record; (c) the use of the Logiak platform, which allows for transparent logic to be written and validated by clinicians; and (d) changes in content and logic can be implemented across a healthcare system in near-real time with central access to all data.</p> | <p>Service delivery</p>          |
| <p>Zambia National Data Warehouse Andrew Kashoka, andrew.kashoka@moh.gov.zm</p>                                                                                                              | <p>Zambia</p> | <p>31/10/2018</p> | <p>The Data Warehouse is for Policy and Program Decision making in the Zambia Health Sector. It is the source of data interoperability from multiple systems which include but are not limited to the integrated human resource information system (iHRIS), electronic logistics management information systems (eLMIS), Lab information systems and the DIstrict Health information system (DHIS). It is the link between data and decision support by forming a robust Extraction Transformation Staging Quality assurance &amp; Loading (ETSQL) logical framework that ensures loading and presentation of high quality data in the Data Warehouse (DW) and Business Intelligence (BI) platforms</p>                                                                                                                                                                                                                                                                                                                                                         | <p>Health information system</p> |



|                                                                                          |        |            |                                                                                                                                                                                                                                                                                                                                                                                                                                                                                                                                                                                                                                                                                                                                                                                                                                                                      |                                                                |
|------------------------------------------------------------------------------------------|--------|------------|----------------------------------------------------------------------------------------------------------------------------------------------------------------------------------------------------------------------------------------------------------------------------------------------------------------------------------------------------------------------------------------------------------------------------------------------------------------------------------------------------------------------------------------------------------------------------------------------------------------------------------------------------------------------------------------------------------------------------------------------------------------------------------------------------------------------------------------------------------------------|----------------------------------------------------------------|
| Zambia immunization supply chain Arun Ramanujapuram, arun@logistimo.com                  | Zambia | 11/11/2015 | Logistimo SCM is a fully mobile-phone based supply chain management system that help manage the vaccine supply chain network in India, starting from the National warehouses, all the way down to the last-mile primary healthcare centers. The platform enables inventory management (including batch and expiry management), order management, demand forecasting, inventory optimization, remote temperature monitoring, asset/equipment management and delivery management. The system is being used in all 116 National, Provincial and District level warehouses. 37 health centers in Lusaka are covered. On a pilot basis, temperature in 17 refrigerators are being monitored remotely using Berlinger. The entire supply chain can be easily monitored using rich, interactive dashboards on web and mobile applications, supported by big data analytics. | Access to medicines, vaccines and technology, Service delivery |
| DHIS2 for COVID-19 Surveillance: Zambia (in development) Rebecca Potter, covid@dhis2.org | Zambia | 27/08/2020 | The DHIS2 digital data package for COVID-19 is designed to accelerate case detection, situation reporting, active surveillance and response in countries. The COVID-19 digital data package includes standard metadata aligned with the WHO's technical guidance on COVID-19 surveillance and has been adapted to local country context and language in this implementation.                                                                                                                                                                                                                                                                                                                                                                                                                                                                                         | Health information system                                      |
| IDeAS. Integrated Decisions and Analytics Support. Mandy Dube, MDube@brhc.com            | Zambia | 28/07/2020 | Implementing smart technology in healthcare facilities to improve the coordination of patient care. A collaboration between the CDC, the Zambian Ministry of Health and a consortium led by BroadReach to develop and deploy integrated patient management systems, delivering better treatment services, including for people living with HIV and AIDS, boosting overall clinical and public health outcomes in Zambia. The cornerstone of the program is enabling facilities across the country with innovative digital capabilities at the heart of                                                                                                                                                                                                                                                                                                               | Health information system, Service delivery                    |

|                                                                                                                         |        |            |                                                                                                                                                                                                                                                                                                                                                                                                                                                                                                                                                                                                                                                                                                                                                                                                                                                                                                                                                                                                                                                                     |                                             |
|-------------------------------------------------------------------------------------------------------------------------|--------|------------|---------------------------------------------------------------------------------------------------------------------------------------------------------------------------------------------------------------------------------------------------------------------------------------------------------------------------------------------------------------------------------------------------------------------------------------------------------------------------------------------------------------------------------------------------------------------------------------------------------------------------------------------------------------------------------------------------------------------------------------------------------------------------------------------------------------------------------------------------------------------------------------------------------------------------------------------------------------------------------------------------------------------------------------------------------------------|---------------------------------------------|
|                                                                                                                         |        |            | patient care. The program supports the integration of data from multiple healthcare systems with the ultimate vision of creating a platform for high-quality and secure electronic medical records for every Zambian.                                                                                                                                                                                                                                                                                                                                                                                                                                                                                                                                                                                                                                                                                                                                                                                                                                               |                                             |
| SmartCare Electronic Health Record System<br>Andrew Kashoka,<br>andrew.kashoka@moh.gov.zm                               | Zambia | 01/09/2020 | The SmartCare system ensures each person in Zambia has a complete electronic health record that is used to ensure the continuity of high-quality, confidential care by providing timely information to caregivers at the point of service                                                                                                                                                                                                                                                                                                                                                                                                                                                                                                                                                                                                                                                                                                                                                                                                                           | Service delivery, Health information system |
| Zambia Antenatal Care (ANC) Digital Adaption Project I Implementation Research<br>Caren Chizuni, carenchizuni@gmail.com | Zambia | 16/09/2020 | This is an implementation research study which will be conducted in Eastern Province of Zambia. The WHO Antenatal care(ANC) digital module is a digital tool powered by OpenSRP. It will enable digital tracking and a decision support system to accelerate the adoption of the new ANC policies in Zambia. This study has two phases: a formative phase, which aims to prepare for the second, demonstration phase, by refining tools to the local context. The objective of the formative research phase is to adapt the WHO digital ANC module to the local ANC package and health delivery context. This phase will gather system requirements for local adaption. This will be facilitated by the ANC Digital Accelerator kit, a systems requirements tool that reflects the module. The demonstration phase will use implementation science to systematically introduce and test the applicability of the adapted WHO ANC package for a positive pregnancy experience and a new digital tool: Zambia digital ANC module at selected Service delivery levels. | Service delivery, Health information system |

|                                                                                                                                                                |                 |                   |                                                                                                                                                                                                                                                                                                                                                                                                                                                                                                                                                                                                                                                                                                                                                                                                                                                                                                                                                                                                                                                                                                                                                                                                                                         |                                                                        |
|----------------------------------------------------------------------------------------------------------------------------------------------------------------|-----------------|-------------------|-----------------------------------------------------------------------------------------------------------------------------------------------------------------------------------------------------------------------------------------------------------------------------------------------------------------------------------------------------------------------------------------------------------------------------------------------------------------------------------------------------------------------------------------------------------------------------------------------------------------------------------------------------------------------------------------------------------------------------------------------------------------------------------------------------------------------------------------------------------------------------------------------------------------------------------------------------------------------------------------------------------------------------------------------------------------------------------------------------------------------------------------------------------------------------------------------------------------------------------------|------------------------------------------------------------------------|
| <p>eNgoma Public Wi-Fi Chilufya Musosha,<br/>chilufya@e-ngoma.com</p>                                                                                          | <p>Zambia</p>   | <p>24/07/2019</p> | <p>The eNgoma Captive Portal Wi-Fi Solution is a communication and engagement platform aimed at communicating with audiences through automated, engaging campaigns (animated digital Ads, infographics, short video clips and surveys - FAQs and Q&amp;As, etc.) that provide a cost-effective proximity engagement solution to augment other traditional communication initiatives being utilized to deliver content to audiences. The eNgoma Captive Portal Wi-Fi Solution reaches audiences on their most viewed devices (their mobile devices) in an innovative, direct, impactful, and cost-effective manner. This has been used in collaboration with partners in the health sector to promote COVID awareness, PrEP, family planning, etc. It gives partners a real-time platform to track IEC materials that would ordinarily be in the form of paper, by converting these materials into byte size digital content, users of the system are provided access to life-changing health information while also having access to free internet access for a limited time. The system promotes a green content sharing platform for IEC materials while tracking views, demographics, and locations of viewers all in real time.</p> | <p>Service delivery</p>                                                |
| <p>Implementation of a Performance-Based Financing Data System for Zimbabwe - using the open source tool Hesabu Benson Muzenda, Benson.Muzenda@cordaid.org</p> | <p>Zimbabwe</p> | <p>29/04/2020</p> | <p>Data System to Manage the performance based financing program including offline mobile data collection of quality of care and client satisfaction, the computation of program indicators, the calculation of incentive bonuses, the management of the PBF primary and subcontractor relationships and distribution of incentives.</p>                                                                                                                                                                                                                                                                                                                                                                                                                                                                                                                                                                                                                                                                                                                                                                                                                                                                                                | <p>Service delivery, Health informaiton system, Healthcare finance</p> |

|                                                                                |          |            |                                                                                                                                                                                                                                                                                                                                                                                                                                                                                                                                                                                                                                                                                                            |                                             |
|--------------------------------------------------------------------------------|----------|------------|------------------------------------------------------------------------------------------------------------------------------------------------------------------------------------------------------------------------------------------------------------------------------------------------------------------------------------------------------------------------------------------------------------------------------------------------------------------------------------------------------------------------------------------------------------------------------------------------------------------------------------------------------------------------------------------------------------|---------------------------------------------|
| Interactive SMS for VMMC Post-surgical follow up Caryl Feldacker, cfeld@uw.edu | Zimbabwe | 16/04/2018 | This project is a RCT study Medic Mobile is conducting in partnership with I-TECH, The University of Washington and ZAZIC, a local organization in Zimbabwe. Around 1-5% of VMMC clients have an adverse event like an infection that needs to be addressed, so currently everyone does multiple in-person follow up visits to be safe. The aim of this study is to test whether these follow up check ins can be performed via SMS. We are also doing a cost and scale/sustainability analysis of the intervention.                                                                                                                                                                                       | Service delivery                            |
| Impilo EHR Dr. Robert Gongora, rgongora536@gmail.com                           | Zimbabwe | 01/02/2016 | The MoHCC introduced a comprehensive, patient-centric Electronic Health Record system (EHR) in 2016, called “Impilo” (meaning “Health” in the local language of Ndebele) and designed and developed by a 100% Zimbabwean technical team, to support health workers to follow clinical protocols for priority health services such as malaria and HIV testing, maternal health services, and other outpatient care services and ensure a high standard of care, while capturing data along the way that was destined for numerous different health programmes.                                                                                                                                              | Service delivery, Health information system |
| COVID-19 Hub for Zimbabwe Kumbirai Matingo, matingonk@gmail.com                | Zimbabwe | 21/03/2020 | The COVID-19 Hub for Zimbabwe house’s location based, informative, raw data and analytical resources that help the citizens, decision makers and persons in the technical fields to fight against this deadly virus which has claimed more lives over the past year. Citizens can also easily find resources using location intelligent applications contained within the hub (i.e., Vaccine Finders and COVID-19 Testing Centers). The solutions include dashboards, raw-datasets, and visual informative tools for the republic of Zimbabwe. Moreover, through the ArcGIS API we have managed to share external integration which leverage our data and resources into other innovative solutions by the | Service delivery                            |

|                                           |          |                               |                                                                         |                                                                |
|-------------------------------------------|----------|-------------------------------|-------------------------------------------------------------------------|----------------------------------------------------------------|
|                                           |          |                               | Youth in Zimbabwe to promote and use ICT in the fight against COVID-19. |                                                                |
| Telehealth                                | Benin    | Country e-Health Profile,2015 | Teleradiology and Telepathology                                         | Service delivery                                               |
| Free emergency numbers                    | Benin    | Country e-Health Profile,2015 | Toll-free emergency numbers                                             | Service delivery                                               |
| Health call centres                       | Benin    | Country e-Health Profile,2015 | Health call centres                                                     | Service delivery                                               |
| Mobile Health                             | Benin    | Country e-Health Profile,2015 | mobile health                                                           | Service delivery                                               |
| Community Mobilization                    | Benin    | Country e-Health Profile,2015 | Community Mobilization                                                  | Service delivery                                               |
| Access to information databases and tools | Benin    | Country e-Health Profile,2015 | Access to information databases and tools                               | Service delivery, Human resources for health                   |
| Decision support system                   | Benin    | Country e-Health Profile,2015 | Decision support system                                                 | Service delivery                                               |
| Health Surveys                            | Benin    | Country e-Health Profile,2015 | Health survey                                                           | Health information system                                      |
| Supply chain information system           | Benin    | Country e-Health Profile,2015 | Supply chain system                                                     | Service delivery, Access to medicines, vaccines and technology |
| Telehealth                                | Botswana | Country e-Health Profile,2015 | Teleradiology,Teledermatology and Telepsychiatry                        | Service delivery                                               |
| Telehealth                                | Botswana | Country e-Health Profile,2015 | Telepathology and remote patient monitoring                             | Service delivery                                               |
| Laboratory information system             | Botswana | Country e-Health Profile,2015 | Laboratory system                                                       | Service delivery                                               |

|                                   |              |                               |                              |                                              |
|-----------------------------------|--------------|-------------------------------|------------------------------|----------------------------------------------|
| Pharmacy information system       | Botswana     | Country e-Health Profile,2015 | Pharmacy system              | Service delivery                             |
| Electronic medical billing system | Botswana     | Country e-Health Profile,2015 | Billing system               | Service delivery, Healthcare finance         |
| Patient records                   | Burkina Faso | Country e-Health Profile,2015 | Electronic medical record    | Service delivery, Health information system  |
| mLearning                         | Burkina Faso | Country e-Health Profile,2015 | Learning and training system | Service delivery, Human resources for health |
| Decision support system           | Burkina Faso | Country e-Health Profile,2015 | Job aids                     | Service delivery                             |
| Diseaser Surveillance             | Burkina Faso | Country e-Health Profile,2015 | Public health surveillance   | Health information system                    |
| Free emergency numbers            | Burundi      | Country e-Health Profile,2015 | Toll-free emergency numbers  | Service delivery                             |
| Health call centres               | Burundi      | Country e-Health Profile,2015 | Health call centres          | Service delivery                             |
| Appointment reminders             | Burundi      | Country e-Health Profile,2015 | Appointment reminders        | Service delivery                             |
| Mobile telehealth                 | Burundi      | Country e-Health Profile,2015 | Mobile telehealth            | Service delivery                             |
| Disaster management               | Burundi      | Country e-Health Profile,2015 | Disaster management          | Service delivery                             |
| Treatment adherence               | Burundi      | Country e-Health Profile,2015 | Treatment adherence          | Service delivery                             |
| Community mobilization            | Burundi      | Country e-Health Profile,2015 | Community mobilization       | Service delivery                             |

|                                           |            |                               |                                           |                                                                |
|-------------------------------------------|------------|-------------------------------|-------------------------------------------|----------------------------------------------------------------|
| Access to information databases and tools | Burundi    | Country e-Health Profile,2015 | Access to information databases and tools | Service delivery, Human resources for health                   |
| Patient monitoring                        | Burundi    | Country e-Health Profile,2015 | Patient monitoring                        | Service delivery                                               |
| Health Surveys                            | Burundi    | Country e-Health Profile,2015 | Health Surveys                            | Health information system                                      |
| Diseaser Surveillance                     | Burundi    | Country e-Health Profile,2015 | Diseaser Surveillance                     | Health information system                                      |
| Laboratory information system/PACS        | Cabo Verde | Country e-Health Profile,2015 | Laboratory information system/PACS        | Service delivery                                               |
| Pharmacy information system               | Cabo Verde | Country e-Health Profile,2015 | Pharmacy information system               | Service delivery                                               |
| Automatic vaccine alert system            | Cabo Verde | Country e-Health Profile,2015 | Automatic vaccine alert system            | Servie delivery                                                |
| Supply chain information system           | Cabo Verde | Country e-Health Profile,2015 | Supply chain information system           | Service delivery, Access to medicines, vaccines and technology |
| e-Learning platform                       | Cabo Verde | Country e-Health Profile,2015 | e-Learning platform                       | Service delivery, Human resources for health                   |
| Free emergency numbers                    | Cabo Verde | Country e-Health Profile,2015 | Toll-free emergency numbers               | Service delivery                                               |
| Health call centres                       | Cabo Verde | Country e-Health Profile,2015 | Health call centres                       | Service delivery                                               |
| Appointment reminders                     | Cabo Verde | Country e-Health Profile,2015 | Appointment reminders                     | Service delivery                                               |
| mHealth                                   | Cabo Verde | Country e-Health Profile,2015 | mHealth                                   | Service delivery                                               |

|                                           |                          |                               |                                           |                                                                |
|-------------------------------------------|--------------------------|-------------------------------|-------------------------------------------|----------------------------------------------------------------|
| Community Mobilization                    | Cabo Verde               | Country e-Health Profile,2015 | Community Mobilization                    | Service delivery                                               |
| Access to information databases and tools | Cabo Verde               | Country e-Health Profile,2015 | Access to information databases and tools | Service delivery, Human resources for health                   |
| Patient records                           | Cabo Verde               | Country e-Health Profile,2015 | Patient records                           | Service delivery, Health information system                    |
| m-Learning                                | Cabo Verde               | Country e-Health Profile,2015 | m-Learning                                | Service delivery, Human resources for health                   |
| Decision support system                   | Cabo Verde               | Country e-Health Profile,2015 | Decision support system                   | Service delivery                                               |
| Health Surveys                            | Cabo Verde               | Country e-Health Profile,2015 | Health Surveys                            | Health information system                                      |
| Disease Surveillace                       | Cabo Verde               | Country e-Health Profile,2015 | Disease Surveillace                       | Health information system                                      |
| Disaster management                       | Central African Republic | Country e-Health Profile,2015 | Disaster management                       | Service delivery                                               |
| Telehealth                                | Côte d'Ivoire            | Country e-Health Profile,2015 | Teleradiology                             | Service delivery                                               |
| Electronic billing system                 | Côte d'Ivoire            | Country e-Health Profile,2015 | Electronic billing system                 | Service delivery, Healthcare finance                           |
| Supply chain information system           | Côte d'Ivoire            | Country e-Health Profile,2015 | Supply chain information system           | Service delivery, Access to medicines, vaccines and technology |
| Toll free emergency numbers               | Côte d'Ivoire            | Country e-Health Profile,2015 | Toll free emergency numbers               | Service delivery                                               |
| Health call centres                       | Côte d'Ivoire            | Country e-Health Profile,2015 | Health call centres                       | Service delivery                                               |



|                                           |               |                               |                                           |                                              |
|-------------------------------------------|---------------|-------------------------------|-------------------------------------------|----------------------------------------------|
| Appointment reminders                     | Côte d'Ivoire | Country e-Health Profile,2015 | Appointment reminders                     | Service delivery                             |
| Disaster management                       | Côte d'Ivoire | Country e-Health Profile,2015 | Disaster management                       | Service delivery                             |
| Treatment adherence                       | Côte d'Ivoire | Country e-Health Profile,2015 | Treatment adherence                       | Service delivery                             |
| Access to information databases and tools | Côte d'Ivoire | Country e-Health Profile,2015 | Access to information databases and tools | Service delivery, Human resources for health |
| mLearning                                 | Côte d'Ivoire | Country e-Health Profile,2015 | mLearning                                 | Service delivery, Human resources for health |
| Patient monitoring                        | Côte d'Ivoire | Country e-Health Profile,2015 | Patient monitoring                        | Service delivery                             |
| Disease Surveillance                      | Côte d'Ivoire | Country e-Health Profile,2015 | Disease Surveillance                      | Health informaiton system                    |
| Telehealth                                | Ethiopia      | Country e-Health Profile,2015 | Teleradiology, teledermatology            | Service delivery                             |
| Telehealth                                | Ethiopia      | Country e-Health Profile,2015 | Telepathology                             | Service delivery                             |
| Electronic Health record                  | Ethiopia      | Country e-Health Profile,2015 | Electronic Health record                  | Service delivey, Health information system   |
| Laboratory information system             | Ethiopia      | Country e-Health Profile,2015 | Laboratory information system             | Service delivery                             |
| Pharmacy information system               | Ethiopia      | Country e-Health Profile,2015 | Pharmacy information system               | Service delivery                             |
| Electronic medical billing system         | Ethiopia      | Country e-Health Profile,2015 | Electronic medical billing system         | Service delivery, Healthcare finance         |

|                                           |          |                               |                                           |                                                                |
|-------------------------------------------|----------|-------------------------------|-------------------------------------------|----------------------------------------------------------------|
| Supply chain information system           | Ethiopia | Country e-Health Profile,2015 | Supply chain information system           | Service delivery, Access to medicines, vaccines and technology |
| e-Learning platform                       | Ethiopia | Country e-Health Profile,2015 | e-Learning platform                       | Service delivery, Human resources for health                   |
| Toll free emergency numbers               | Ethiopia | Country e-Health Profile,2015 | Toll free emergency numbers               | Service delivery                                               |
| Health call centres                       | Ethiopia | Country e-Health Profile,2015 | Health call centres                       | Service delivery                                               |
| Appointment reminders                     | Ethiopia | Country e-Health Profile,2015 | Appointment reminders                     | Service delivery                                               |
| Mobile telehealth                         | Ethiopia | Country e-Health Profile,2015 | Mobile telehealth                         | Service delivery                                               |
| Disaster management                       | Ethiopia | Country e-Health Profile,2015 | Disaster management                       | Service delivery                                               |
| Treatment adherence                       | Ethiopia | Country e-Health Profile,2015 | Treatment adherence                       | Service delivery                                               |
| Access to information databases and tools | Ethiopia | Country e-Health Profile,2015 | Access to information databases and tools | Service delivery, Human resources for health                   |
| m-Learning                                | Ethiopia | Country e-Health Profile,2015 | m-Learning                                | Service delivery, Human resources for health                   |
| Health Surveys                            | Ethiopia | Country e-Health Profile,2015 | Health Surveys                            | Health information system                                      |
| Disease surveillance                      | Ethiopia | Country e-Health Profile,2015 | Disease surveillance                      | Health information system                                      |
| Telehealth                                | Gambia   | Country e-Health Profile,2015 | Teleradiology, teledermatology            | Service delivery                                               |

|                                 |        |                               |                                 |                                                                |
|---------------------------------|--------|-------------------------------|---------------------------------|----------------------------------------------------------------|
| Telehealth                      | Gambia | Country e-Health Profile,2015 | Telepathology                   | Service delivery                                               |
| Supply chain information system | Gambia | Country e-Health Profile,2015 | Supply chain information system | Service delivery, Access to medicines, vaccines and technology |
| e-Learning platform             | Gambia | Country e-Health Profile,2015 | e-Learning platform             | Service delivery, Human resources for health                   |
| Toll free emergency             | Gambia | Country e-Health Profile,2015 | Toll free emergency             | Service delivery                                               |
| Appointment reminders           | Gambia | Country e-Health Profile,2015 | Appointment reminders           | Service delivery                                               |
| Disaster management             | Gambia | Country e-Health Profile,2015 | Disaster management             | Service delivery                                               |
| Community mobilization          | Gambia | Country e-Health Profile,2015 | Community mobilization          | Service delivery                                               |
| Health survey                   | Gambia | Country e-Health Profile,2015 | Health survey                   | Health information system                                      |
| Electronic billing system       | Ghana  | Country e-Health Profile,2015 | Electronic billing system       | Service delivery,Healthcare finance                            |
| Supply chain information system | Ghana  | Country e-Health Profile,2015 | Supply chain information system | Service delivery, Access to medicines, vaccines and technology |
| e-Learning platform             | Ghana  | Country e-Health Profile,2015 | e-Learning platform             | Service delivery, Human resources for health                   |
| Toll free Emergency             | Ghana  | Country e-Health Profile,2015 | Toll free Emergency numbers     | Service delivery                                               |
| Call centres and numbers        | Ghana  | Country e-Health Profile,2015 | Health Call centres             | Service delivery                                               |

|                                           |         |                               |                                            |                                                                |
|-------------------------------------------|---------|-------------------------------|--------------------------------------------|----------------------------------------------------------------|
| Disaster management                       | Ghana   | Country e-Health Profile,2015 | Disaster management                        | Service delivery                                               |
| Community mobilization                    | Ghana   | Country e-Health Profile,2015 | Community mobilization                     | Service delivery                                               |
| Access to information databases and tools | Ghana   | Country e-Health Profile,2015 | Access to information databases and tools  | Service delivery, Human resources for health                   |
| Patient records                           | Ghana   | Country e-Health Profile,2015 | Patient records                            | Service delivery, Health information system                    |
| m-Learning                                | Ghana   | Country e-Health Profile,2015 | m-Learning                                 | Service delivery, Human resources for health                   |
| Patient monitoring                        | Ghana   | Country e-Health Profile,2015 | Patient monitoring                         | Service delivery                                               |
| Health Survey                             | Ghana   | Country e-Health Profile,2015 | Health Survey                              | Health information system                                      |
| Disease Surveillance                      | Ghana   | Country e-Health Profile,2015 | Disease Surveillance                       | Health information system                                      |
| Telehealth                                | Kenya   | Country e-Health Profile,2015 | Teleradiology                              | Service delivery                                               |
| Supply chain information system           | Kenya   | Country e-Health Profile,2015 | Supply chain management information system | Service delivery, Access to medicines, vaccines and technology |
| Laboratory information system             | Lesotho | Country e-Health Profile,2015 | Laboratory information system              | Service delivery                                               |
| Pharmacy information system               | Lesotho | Country e-Health Profile,2015 | Pharmacy information system                | Service delivery                                               |
| Electronic billing system                 | Lesotho | Country e-Health Profile,2015 | Electronic billing system                  | Service delivery, Healthcare finance                           |

|                                 |            |                               |                                 |                                                               |
|---------------------------------|------------|-------------------------------|---------------------------------|---------------------------------------------------------------|
| Supply chain information system | Lesotho    | Country e-Health Profile,2015 | Supply chain information system | Service delivery,Access to medicines, vaccines and technology |
| Telehealth                      | Madagascar | Country e-Health Profile,2015 | Teleradiology, Tele dermatology | Service delivery                                              |
| e-Learning platform             | Madagascar | Country e-Health Profile,2015 | e-Learning platform             | Service delivery, Human resources for health                  |
| Appointment reminders           | Madagascar | Country e-Health Profile,2015 | Appointment reminders           | Service delivery                                              |
| Mobile telehealth               | Madagascar | Country e-Health Profile,2015 | Mobile telehealth               | Service delivery                                              |
| Disaster management             | Madagascar | Country e-Health Profile,2015 | Disaster management             | Service delivery                                              |
| Treatment adherence             | Madagascar | Country e-Health Profile,2015 | Treatment adherence             | Service delivery                                              |
| Community mobilization          | Madagascar | Country e-Health Profile,2015 | Community mobilization          | Service delivery                                              |
| Patient records                 | Madagascar | Country e-Health Profile,2015 | Patient records                 | Service delivery, Health information system                   |
| m-Learning                      | Madagascar | Country e-Health Profile,2015 | m-Learning                      | Service delivery, Human resources for health                  |
| Decision support system         | Madagascar | Country e-Health Profile,2015 | Decision support system         | Service delivery, Human resources for health                  |
| Health survey                   | Madagascar | Country e-Health Profile,2015 | Health survey                   | Health information system                                     |
| Telehealth                      | Malawi     | Country e-Health Profile,2015 | Teleradiology                   | Service delivery                                              |

|                                           |        |                               |                                           |                                                                |
|-------------------------------------------|--------|-------------------------------|-------------------------------------------|----------------------------------------------------------------|
| Electronic billing system                 | Malawi | Country e-Health Profile,2015 | Electronic billing system                 | Service delivery, Healthcare finance                           |
| Supply chain information system           | Malawi | Country e-Health Profile,2015 | Supply chain information system           | Service delivery, Access to medicines, vaccines and technology |
| e-Learning platform                       | Malawi | Country e-Health Profile,2015 | e-Learning platform                       | Service delivery, Human resources and health                   |
| Toll free emergency numbers               | Malawi | Country e-Health Profile,2015 | Toll free emergency numbers               | Service delivery                                               |
| Health call centres                       | Malawi | Country e-Health Profile,2015 | Health call centres                       | Service delivery                                               |
| Appointment reminders                     | Malawi | Country e-Health Profile,2015 | Appointment reminders                     | Service delivery                                               |
| Mobile telehealth                         | Malawi | Country e-Health Profile,2015 | Mobile telehealth                         | Service delivery                                               |
| Disaster management                       | Malawi | Country e-Health Profile,2015 | Disaster management                       | Service delivery                                               |
| Community mobilization                    | Malawi | Country e-Health Profile,2015 | Community mobilization                    | Service delivery                                               |
| Access to information databases and tools | Malawi | Country e-Health Profile,2015 | Access to information databases and tools | Service delivery, Human resources and health                   |
| Patient records                           | Malawi | Country e-Health Profile,2015 | Patient records                           | Service delivery, Health information system                    |
| m-Learning                                | Malawi | Country e-Health Profile,2015 | m-Learning                                | Service delivery, Human resources for health                   |
| Decision support system                   | Malawi | Country e-Health Profile,2015 | Decision support system                   | Service delivery                                               |

|                                 |        |                               |                                 |                                                                |
|---------------------------------|--------|-------------------------------|---------------------------------|----------------------------------------------------------------|
| Health survey                   | Malawi | Country e-Health Profile,2015 | Health survey                   | Health information system                                      |
| Disease Surveillance            | Malawi | Country e-Health Profile,2015 | Disease Surveillance            | Health information system                                      |
| Telehealth                      | Mali   | Country e-Health Profile,2015 | Teleradiology, Telepathology    | Service delivery                                               |
| Electronic billing system       | Mali   | Country e-Health Profile,2015 | Electronic billing system       | Service delivery, Healthcare finance                           |
| Supply chain information system | Mali   | Country e-Health Profile,2015 | Supply chain information system | Service delivery, Access to medicines, vaccines and technology |
| e-Learning platform             | Mali   | Country e-Health Profile,2015 | e-Learning platform             | Service delivery, Human resources for health                   |
| Toll free emergency             | Mali   | Country e-Health Profile,2015 | Toll free emergency numbers     | Service delivery                                               |
| Call centres and numbers        | Mali   | Country e-Health Profile,2015 | Health Call centres             | Service delivery                                               |
| Appointment reminders           | Mali   | Country e-Health Profile,2015 | Appointment reminders           | Service delivery                                               |
| Mobile telehealth               | Mali   | Country e-Health Profile,2015 | Mobile telehealth               | Service delivery                                               |
| Disaster management             | Mali   | Country e-Health Profile,2015 | Disaster management             | Service delivery                                               |
| Treatment adherence             | Mali   | Country e-Health Profile,2015 | Treatment adherence             | Service delivery                                               |
| Community mobilization          | Mali   | Country e-Health Profile,2015 | Community mobilization          | Service delivery                                               |

|                                           |            |                               |                                           |                                                                |
|-------------------------------------------|------------|-------------------------------|-------------------------------------------|----------------------------------------------------------------|
| Access to information databases and tools | Mali       | Country e-Health Profile,2015 | Access to information databases and tools | Service delivery, Human resources for health                   |
| Patient records                           | Mali       | Country e-Health Profile,2015 | Patient records                           | Service delivery, Health information system                    |
| m-Learning                                | Mali       | Country e-Health Profile,2015 | m-Learning                                | Service delivery, Human resources for health                   |
| Decision support system                   | Mali       | Country e-Health Profile,2015 | Decision support system                   | Service delivery                                               |
| Health survey                             | Mali       | Country e-Health Profile,2015 | Health survey                             | Health information system                                      |
| Disease surveillance                      | Mali       | Country e-Health Profile,2015 | Disease surveillance                      | Health information system                                      |
| Telehealth                                | Mauritania | Country e-Health Profile,2015 | Teleradiology, Telepathology              | Service delivery                                               |
| Electronic billing system                 | Mauritania | Country e-Health Profile,2015 | Electronic billing system                 | Service delivery, Healthcare finance                           |
| Supply chain information system           | Mauritania | Country e-Health Profile,2015 | Supply chain information system           | Service delivery, Access to medicines, vaccines and technology |
| e-Learning platform                       | Mauritania | Country e-Health Profile,2015 | e-Learning platform                       | Service delivery, Human resources for health                   |
| Toll free emergency                       | Mauritania | Country e-Health Profile,2015 | Toll free emergency                       | Service delivery                                               |
| Mobile telehealth                         | Mauritania | Country e-Health Profile,2015 | Mobile telehealth                         | Service delivery                                               |
| Disaster management                       | Mauritania | Country e-Health Profile,2015 | Disaster management                       | Service delivery                                               |



|                                           |            |                               |                                                                                         |                                                                |
|-------------------------------------------|------------|-------------------------------|-----------------------------------------------------------------------------------------|----------------------------------------------------------------|
| Community mobilization                    | Mauritania | Country e-Health Profile,2015 | Community mobilization                                                                  | Service delivery                                               |
| Access to information databases and tools | Mauritania | Country e-Health Profile,2015 | Access to information databases and tools                                               | Service delivery, Human resources for health                   |
| Patient monitoring                        | Mauritania | Country e-Health Profile,2015 | Patient monitoring                                                                      | Service delivery                                               |
| Health survey                             | Mauritania | Country e-Health Profile,2015 | Health survey                                                                           | Health information system                                      |
| Disease Surveillance                      | Mauritania | Country e-Health Profile,2015 | Disease Surveillance                                                                    | Health information system                                      |
| Telehealth                                | Niger      | Country e-Health Profile,2015 | Teleradiology, teledermatology, telepathology,telepsychiatry, remote patient monitoring | Service delivery                                               |
| Electronic billing system                 | Niger      | Country e-Health Profile,2015 | Electronic billing system                                                               | Service delivery, Healthcare finance                           |
| Supply chain information system           | Niger      | Country e-Health Profile,2015 | Supply chain information system                                                         | Service delivery, Access to medicines, vaccines and technology |
| e-Learning platform                       | Niger      | Country e-Health Profile,2015 | e-Learning platform                                                                     | Service delivery, Human resources for health                   |
| Toll-free emergency number                | Niger      | Country e-Health Profile,2015 | Toll-free emergency number                                                              | Service delivery                                               |
| Call centres and numbers                  | Niger      | Country e-Health Profile,2015 | Health call centres                                                                     | Service delivery                                               |
| Appointment reminders                     | Niger      | Country e-Health Profile,2015 | Appointment reminders                                                                   | Service delivery                                               |
| Mobile telehealth                         | Niger      | Country e-Health Profile,2015 | Mobile telehealth                                                                       | Service delivery                                               |

|                                           |        |                               |                                           |                                              |
|-------------------------------------------|--------|-------------------------------|-------------------------------------------|----------------------------------------------|
| Disaster management                       | Niger  | Country e-Health Profile,2015 | Disaster management                       | Service delivery                             |
| Treatment adherence                       | Niger  | Country e-Health Profile,2015 | Treatment adherence                       | Service delivery                             |
| Community mobilization                    | Niger  | Country e-Health Profile,2015 | Community mobilization                    | Service delivery                             |
| Access to information databases and tools | Niger  | Country e-Health Profile,2015 | Access to information databases and tools | Service delivery, Human resoures for health  |
| m-Learning                                | Niger  | Country e-Health Profile,2015 | m-Learning                                | Service delivery, Human resources for health |
| Decision support system                   | Niger  | Country e-Health Profile,2015 | Decision support system                   | Service delivery                             |
| Patient monitoring                        | Niger  | Country e-Health Profile,2015 | Patient monitoring                        | Service delivery                             |
| Health survey                             | Niger  | Country e-Health Profile,2015 | Health survey                             | Health information system                    |
| Disease Surveillace                       | Niger  | Country e-Health Profile,2015 | Disease Surveillace                       | Health information system                    |
| Telehealth                                | Rwanda | Country e-Health Profile,2015 | Teleradiology                             | Service delivery                             |
| Telehealth                                | Rwanda | Country e-Health Profile,2015 | Remote patient monitoring                 | Service delivery                             |
| e-Learning platform                       | Rwanda | Country e-Health Profile,2015 | e-Learning platform                       | Service delivery, Human resources for health |
| Toll-free emergency number                | Rwanda | Country e-Health Profile,2015 | Toll-free emergency number                | Service delivery                             |

|                                           |         |                               |                                               |                                              |
|-------------------------------------------|---------|-------------------------------|-----------------------------------------------|----------------------------------------------|
| Health call centres                       | Rwanda  | Country e-Health Profile,2015 | Health call centres                           | Service delivery                             |
| Appointment reminders                     | Rwanda  | Country e-Health Profile,2015 | Appointment reminders                         | Service delivery                             |
| Mobile telehealth                         | Rwanda  | Country e-Health Profile,2015 | Mobile telehealth                             | Service delivery                             |
| Disaster management                       | Rwanda  | Country e-Health Profile,2015 | Disaster management                           | Service delivery                             |
| Community Mobilization                    | Rwanda  | Country e-Health Profile,2015 | Community Mobilization                        | Service delivery                             |
| Access to information databases and tools | Rwanda  | Country e-Health Profile,2015 | Access to information databases and tools     | Service delivery, Human resources for health |
| Patient records                           | Rwanda  | Country e-Health Profile,2015 | Patient records                               | Service delivery, Health information system  |
| Decision support system                   | Rwanda  | Country e-Health Profile,2015 | Decision support system                       | Service delivery                             |
| Patient monitoring                        | Rwanda  | Country e-Health Profile,2015 | Patient monitoring                            | Service delivery                             |
| Disease Surveillance                      | Rwanda  | Country e-Health Profile,2015 | Disease Surveillance                          | Health information system                    |
| Telehealth                                | Senegal | Country e-Health Profile,2015 | Teleradiology, Teledermatology, telepathology | Service delivery                             |
| Telehealth                                | Senegal | Country e-Health Profile,2015 | Remote patient monitoring                     | Service delivery                             |
| Electronic billing system                 | Senegal | Country e-Health Profile,2015 | Electronic billing system                     | Service delivery, Healthcare finance         |

|                                           |         |                               |                                           |                                                                |
|-------------------------------------------|---------|-------------------------------|-------------------------------------------|----------------------------------------------------------------|
| Supply chain information system           | Senegal | Country e-Health Profile,2015 | Supply chain information system           | Service delivery, Access to medicines, vaccines and technology |
| e-Learning platform                       | Senegal | Country e-Health Profile,2015 | e-Learning platform                       | Service delivery, Human resources for health                   |
| Toll free emergency                       | Senegal | Country e-Health Profile,2015 | Toll free emergency number                | Service delivery                                               |
| Call centres and numbers                  | Senegal | Country e-Health Profile,2015 | Health Call centres                       | Service delivery                                               |
| Appointment reminders                     | Senegal | Country e-Health Profile,2015 | Appointment reminders                     | Service delivery                                               |
| Mobile telehealth                         | Senegal | Country e-Health Profile,2015 | Mobile telehealth                         | Service delivery                                               |
| Disaster management                       | Senegal | Country e-Health Profile,2015 | Disaster management                       | Service delivery                                               |
| Treatment adherence                       | Senegal | Country e-Health Profile,2015 | Treatment adherence                       | Service delivery                                               |
| Community mobilization                    | Senegal | Country e-Health Profile,2015 | Community mobilization                    | Service delivery                                               |
| Access to information databases and tools | Senegal | Country e-Health Profile,2015 | Access to information databases and tools | Service delivery, Human resources for health                   |
| Patient records                           | Senegal | Country e-Health Profile,2015 | Patient records                           | Service delivery, Health information system                    |
| m-Learning                                | Senegal | Country e-Health Profile,2015 | m-Learning                                | Service delivery, Human resources for health                   |
| Decision support system                   | Senegal | Country e-Health Profile,2015 | Decision support system                   | Service delivery                                               |

|                                           |              |                               |                                           |                                              |
|-------------------------------------------|--------------|-------------------------------|-------------------------------------------|----------------------------------------------|
| Patient monitoring                        | Senegal      | Country e-Health Profile,2015 | Patient monitoring                        | Service delivery                             |
| Health survey                             | Senegal      | Country e-Health Profile,2015 | Health survey                             | Health information system                    |
| Disease Surveillance                      | Senegal      | Country e-Health Profile,2015 | Disease Surveillance                      | Health information system                    |
| Health call centres                       | South Africa | Country e-Health Profile,2015 | Health call centres                       | Service delivery                             |
| Appointment reminders                     | South Africa | Country e-Health Profile,2015 | Appointment reminders                     | Service delivery                             |
| Mobile telehealth                         | South Africa | Country e-Health Profile,2015 | Mobile telehealth                         | Service delivery                             |
| Treatment adherence                       | South Africa | Country e-Health Profile,2015 | Treatment adherence                       | Service delivery                             |
| Community mobilization                    | South Africa | Country e-Health Profile,2015 | Community mobilization                    | Service delivery                             |
| Access to information databases and tools | South Africa | Country e-Health Profile,2015 | Access to information databases and tools | Service delivery, Human resources for health |
| Patient records                           | South Africa | Country e-Health Profile,2015 | Patient records                           | Service delivery, Health information ssystem |
| Patient monitoring                        | South Africa | Country e-Health Profile,2015 | Patient monitoring                        | Service delivery                             |
| Health survey                             | South Africa | Country e-Health Profile,2015 | Health survey                             | Health information system                    |
| Disease Surveillance                      | South Africa | Country e-Health Profile,2015 | Disease Surveillance                      | Health information system                    |

|                                 |             |                               |                                 |                                                                |
|---------------------------------|-------------|-------------------------------|---------------------------------|----------------------------------------------------------------|
| Health call centres             | South Sudan | Country e-Health Profile,2015 | Health call centres             | Service delivery                                               |
| Community mobilization          | South Sudan | Country e-Health Profile,2015 | Community mobilization          | Service delivery                                               |
| Telehealth                      | Sudan       | Country e-Health Profile,2015 | Teleradiology                   | Service delivery                                               |
| Electronic billing system       | Sudan       | Country e-Health Profile,2015 | Electronic billing system       | Service delivery, Healthcare finance                           |
| Supply chain information system | Sudan       | Country e-Health Profile,2015 | Supply chain information system | Service delivery, Access to medicines, vaccines and technology |
| e-Learning platform             | Sudan       | Country e-Health Profile,2015 | e-Learning platform             | Service delivery, Human resources for health                   |
| Toll-free emergency number      | Sudan       | Country e-Health Profile,2015 | Toll-free emergency number      | Service delivery                                               |
| Health call centres             | Sudan       | Country e-Health Profile,2015 | Health call centres             | Service delivery                                               |
| Mobile telehealth               | Sudan       | Country e-Health Profile,2015 | Mobile telehealth               | Service delivery                                               |
| Disaster management             | Sudan       | Country e-Health Profile,2015 | Disaster management             | Service delivery                                               |
| Community mobilization          | Sudan       | Country e-Health Profile,2015 | Community mobilization          | Service delivery                                               |
| Decision support system         | Sudan       | Country e-Health Profile,2015 | Decision support system         | Service delivery                                               |
| Health survey                   | Sudan       | Country e-Health Profile,2015 | Health survey                   | Health information system                                      |

|                                           |        |                               |                                                |                                                               |
|-------------------------------------------|--------|-------------------------------|------------------------------------------------|---------------------------------------------------------------|
| Telehealth                                | Uganda | Country e-Health Profile,2015 | Teleradiology, tele dermatology, telepathology | Service delivery                                              |
| Telehealth                                | Uganda | Country e-Health Profile,2015 | Telepsychiatry, remote patient monitoring      | Service delivery                                              |
| Electronic billing system                 | Uganda | Country e-Health Profile,2015 | Electronic billing system                      | Service delivery, Healthcare finance                          |
| Supply chain information system           | Uganda | Country e-Health Profile,2015 | Supply chain information system                | Service delivery, Access to medicine, vaccines and technology |
| e-Learning platform                       | Uganda | Country e-Health Profile,2015 | e-Learning platform                            | Service delivery, Human resources for health                  |
| Toll free emergency numbers               | Uganda | Country e-Health Profile,2015 | Toll free emergency numbers                    | Service delivery                                              |
| Health call centres                       | Uganda | Country e-Health Profile,2015 | Health call centres                            | Service delivery                                              |
| Appointment reminders                     | Uganda | Country e-Health Profile,2015 | Appointment reminders                          | Service delivery                                              |
| Mobile telehealth                         | Uganda | Country e-Health Profile,2015 | Mobile telehealth                              | Service delivery                                              |
| Disaster management                       | Uganda | Country e-Health Profile,2015 | Disaster management                            | Service delivery                                              |
| Treatment adherence                       | Uganda | Country e-Health Profile,2015 | Treatment adherence                            | Service delivery                                              |
| Community mobilization                    | Uganda | Country e-Health Profile,2015 | Community mobilization                         | Service delivery                                              |
| Access to information databases and tools | Uganda | Country e-Health Profile,2015 | Access to information databases and tools      | Service delivery, Human resources for health                  |

|                                 |        |                               |                                 |                                              |
|---------------------------------|--------|-------------------------------|---------------------------------|----------------------------------------------|
| Patient records                 | Uganda | Country e-Health Profile,2015 | Patient records                 | Service delivery, Health information system  |
| mLearning                       | Uganda | Country e-Health Profile,2015 | mLearning                       | Service delivery                             |
| Decision support system         | Uganda | Country e-Health Profile,2015 | Decision support system         | Service delivery                             |
| Patient monitoring              | Uganda | Country e-Health Profile,2015 | Patient monitoring              | Service delivery                             |
| Health survey                   | Uganda | Country e-Health Profile,2015 | Health survey                   | Health information system                    |
| Disease Surveillance            | Uganda | Country e-Health Profile,2015 | Disease Surveillance            | Health information system                    |
| Telehealth                      | Zambia | Country e-Health Profile,2015 | Teleradiology                   | Service delivery                             |
| Supply chain information system | Zambia | Country e-Health Profile,2015 | Supply chain information system | Service delivery                             |
| e-Learning platform             | Zambia | Country e-Health Profile,2015 | e-Learning platform             | Service delivery, Human resources for health |
| Toll free emergency numbers     | Zambia | Country e-Health Profile,2015 | Toll free emergency numbers     | Service delivery                             |
| Health call centres             | Zambia | Country e-Health Profile,2015 | Health call centres             | Service delivery                             |
| Appointment reminders           | Zambia | Country e-Health Profile,2015 | Appointment reminders           | Service delivery                             |
| Treatment adherence             | Zambia | Country e-Health Profile,2015 | Treatment adherence             | Service delivery                             |



|                         |          |                               |                             |                                              |
|-------------------------|----------|-------------------------------|-----------------------------|----------------------------------------------|
| Community mobilization  | Zambia   | Country e-Health Profile,2015 | Community mobilization      | Service delivery                             |
| Patient monitoring      | Zambia   | Country e-Health Profile,2015 | Patient monitoring          | Service delivery                             |
| m-Learning              | Zambia   | Country e-Health Profile,2015 | m-Learning                  | Service delivery, Human resources for health |
| Decision support system | Zambia   | Country e-Health Profile,2015 | Decision support system     | Service delivery                             |
| Health survey           | Zambia   | Country e-Health Profile,2015 | Health survey               | Health information system                    |
| Disease Surveillance    | Zambia   | Country e-Health Profile,2015 | Disease Surveillance        | Health information system                    |
| Telehealth              | Zimbabwe | Country e-Health Profile,2015 | Teleradiology               | Service delivery                             |
| Telehealth              | Zimbabwe | Country e-Health Profile,2015 | Tele dermatology            | Service delivery                             |
| Telehealth              | Zimbabwe | Country e-Health Profile,2015 | Telepathology               | Service delivery                             |
| Telehealth              | Zimbabwe | Country e-Health Profile,2015 | Remote patient monitoring   | Service delivery                             |
| e-Learning platform     | Zimbabwe | Country e-Health Profile,2015 | e-Learning platform         | Service delivery, Human resources for health |
| Toll free emergency     | Zimbabwe | Country e-Health Profile,2015 | Toll free emergency numbers | Service delivery                             |
| Health call centres     | Zimbabwe | Country e-Health Profile,2015 | Health call centres         | Service delivery                             |

|                                           |          |                               |                                           |                                              |
|-------------------------------------------|----------|-------------------------------|-------------------------------------------|----------------------------------------------|
| Appointment reminders                     | Zimbabwe | Country e-Health Profile,2015 | Appointment reminders                     | Service delivery                             |
| Mobile telehealth                         | Zimbabwe | Country e-Health Profile,2015 | Mobile telehealth                         | Service delivery                             |
| Disaster management                       | Zimbabwe | Country e-Health Profile,2015 | Disaster management                       | Service delivery                             |
| Treatment adherence                       | Zimbabwe | Country e-Health Profile,2015 | Treatment adherence                       | Service delivery                             |
| Community Mobilization                    | Zimbabwe | Country e-Health Profile,2015 | Community Mobilization                    | Service delivery                             |
| Access to information databases and tools | Zimbabwe | Country e-Health Profile,2015 | Access to information databases and tools | Service delivery, Human resources for health |
| Patient records                           | Zimbabwe | Country e-Health Profile,2015 | Patient records                           | Service delivery                             |
| mLearning                                 | Zimbabwe | Country e-Health Profile,2015 | mLearning                                 | Service delivery, Human resources for health |
| Decision support system                   | Zimbabwe | Country e-Health Profile,2015 | Decision support system                   | Service delivery                             |
| Patient monitoring                        | Zimbabwe | Country e-Health Profile,2015 | Patient monitoring                        | Service delivery                             |
| Health survey                             | Zimbabwe | Country e-Health Profile,2015 | Health survey                             | Health information system                    |
| Disease Surveillance                      | Zimbabwe | Country e-Health Profile,2015 | Disease Surveillance                      | Health information system                    |

|                                                                                                                                                              |                              |      |                                                                                                                                                                                                                                                                                                                                                               |                                               |
|--------------------------------------------------------------------------------------------------------------------------------------------------------------|------------------------------|------|---------------------------------------------------------------------------------------------------------------------------------------------------------------------------------------------------------------------------------------------------------------------------------------------------------------------------------------------------------------|-----------------------------------------------|
| m-health applications in Botswana: telemedicine and education, Littman-Quinn et al; 2013                                                                     | Botswana                     | 2013 | The Botswana-University of Pennsylvania Partnership (BUP) has piloted four mobile telemedicine projects in the specialties of women's health (cervical cancer screening utilizing visual inspection with acetic acid), radiology, oral medicine and dermatology. BUP has initiated an m-learning programme with the University of Botswana School of Medicine | Service delivery, Human resources for health. |
| e-MANIC, Institut de Recherche en Sciences de la Sante, Burkina Faso,2020                                                                                    | Burkina Faso                 | 2020 | Artificial intelligence integrating multiple layers of clinical information such as clinical examination, signs/symptoms and medical history, and laboratory information such as outcomes of biomarkers (CRP and WBC) and pathogen specific POCT (malaria and bacterial infections) and oximetry                                                              | Service delivery                              |
| Smart glasses for telemedicine, Diaka et al;2021                                                                                                             | Democratic Republic of Congo | 2021 | To improve primary healthcare services, especially referrals to the district hospital, for the population in three health centres in the rural district Kingandu in the Democratic Republic of the Congo (DRC) by introducing Smart Glasses, and leveraging them for telemedicine.                                                                            | Service delivery                              |
| Cloud-based peri-operative registry,Network of perioperative critical care, 2020                                                                             | Ethiopia                     | 2020 | Context specific, clinician-led, multicentre real-time peri-operative registry in Ethiopia                                                                                                                                                                                                                                                                    | Service delivery                              |
| mHealth Intervention on Delivery and Postnatal Care Utilization, Spigt et al; 2016                                                                           | Ethiopia                     | 2016 | The Effects of a Locally Developed mHealth Intervention on Delivery and Postnatal Care Utilization; A Prospective Controlled Evaluation among Health Centres in Ethiopia                                                                                                                                                                                      | Service delivery                              |
| USAID Digital Health Activity (DHA), <a href="https://www.jsi.com/project/digital-health-activity/">https://www.jsi.com/project/digital-health-activity/</a> | Ethiopia                     | 2020 | The USAID-funded Digital Health Activity (DHA) is a five-year project that supports Ethiopia in improving the quality and availability of healthcare services through the deployment of data-driven and patient-centered digital tools.                                                                                                                       | Service delivery, Health information system   |

|                                                                                                                                                                               |          |      |                                                                                                                                                                                                                                                                                                                                   |                                               |
|-------------------------------------------------------------------------------------------------------------------------------------------------------------------------------|----------|------|-----------------------------------------------------------------------------------------------------------------------------------------------------------------------------------------------------------------------------------------------------------------------------------------------------------------------------------|-----------------------------------------------|
| Cloud-based electronic data system, Jede et al;2020                                                                                                                           | Ethiopia | 2020 | A cervical cancer screening campaign was conducted in a rural community in Ethiopia. All women aged 25-65 years were offered genital self-sampling using the Evalyn Brush®. Samples were HPV-DNA-tested at a central laboratory. Key indicators were captured on tablet computers and linked by a cloud-based information system. | Service delivery, Health information system   |
| 'virtual ward' (VW) system, Wariri et al; 2021                                                                                                                                | Gambia   | 2021 | Establishing and operating a 'virtual ward' system to provide care for patients with COVID-19 at home: experience from The Gambia                                                                                                                                                                                                 | Service delivery                              |
| Empower Health software, Otieno et al;2020                                                                                                                                    | Ghana    | 2020 | On the mobile application, clinicians viewed patient data, provided direct patient feedback, and wrote electronic prescriptions accessible through participating pharmacies                                                                                                                                                       | Service delivery                              |
| COVID-19 Tracker App, <a href="https://www.itu.int/hub/2020/05/ghana-launches-covid-19-tracker-app/">https://www.itu.int/hub/2020/05/ghana-launches-covid-19-tracker-app/</a> | Ghana    | 2020 | The COVID-19 Tracker App is able to trace contacts of persons infected by the virus and show where they have been in recent times through various telephone-related data, and link such people to health professionals for urgent action to be taken.                                                                             | Service delivery, Health information system   |
| mHealth to Train Community Health Nurses, Asgary et al; 2016                                                                                                                  | Ghana    | 2016 | We evaluated the feasibility and limited efficacy of a smartphone-based training of community health nurses in visual inspection of the cervix under acetic acid (VIA)                                                                                                                                                            | Service delivery, Human resources for healths |
| Telecytology in East Africa, Kumar et al;2012                                                                                                                                 | Kenya    | 2012 | A pilot study to assess the feasibility of telecytology as a diagnostic tool in difficult cases originating from a hospital in East Africa                                                                                                                                                                                        | Service delivery                              |
| Real-Time Monitoring and Evaluation of a Visual-Based Cervical Cancer Screening Program Using a Decision Support Job Aid, Peterson et al 2016                                 | Kenya    | 2016 | We tested the implementation of the novel job aid feature on the mobile colposcope app during an EVA deployment in a cervical cancer screening camp in Nairobi, Kenya. We show that the integration of this feature allows for improved M&E of VIA programs by providing key statistics in real time.                             | Service delivery, Health information system   |
| The Millennium Villages Project (MVP), mobile Health tool, Mushamiri et al; 2015                                                                                              | Kenya    | 2015 | Evaluation of the impact of a mobile health system on adherence to antenatal and postnatal care and prevention of mother-to-child transmission of HIV programs in Kenya                                                                                                                                                           | Service delivery                              |

|                                                                          |       |      |                                                                                                                                                                                                                                                                                                                                                                                                                                                                                                                                                                                                                                                                                                                                                                                  |                                             |
|--------------------------------------------------------------------------|-------|------|----------------------------------------------------------------------------------------------------------------------------------------------------------------------------------------------------------------------------------------------------------------------------------------------------------------------------------------------------------------------------------------------------------------------------------------------------------------------------------------------------------------------------------------------------------------------------------------------------------------------------------------------------------------------------------------------------------------------------------------------------------------------------------|---------------------------------------------|
| Mobile research, Leidich et al; 2018                                     | Kenya | 2018 | Evaluating the feasibility and acceptability of sending pregnancy and abortion history surveys through SMS text messaging to help reach sustainable development goal 3                                                                                                                                                                                                                                                                                                                                                                                                                                                                                                                                                                                                           | Health information system                   |
| Afya data, Karumuribo et al; 2017                                        | Kenya | 2017 | A mobile based disease sureillance system                                                                                                                                                                                                                                                                                                                                                                                                                                                                                                                                                                                                                                                                                                                                        | Service delivery, Health information system |
| Connected Diagnostics, van Duijn; 2021                                   | Kenya | 2021 | Digitalized rapid diagnostic tests (RDTs) through photography and interprets and results stored in cloud-based databases through dedicated RDT readers.                                                                                                                                                                                                                                                                                                                                                                                                                                                                                                                                                                                                                          | Service delivery                            |
| The Health and Demographic Surveillance System (HDSS), Kaneko et al 2012 | Kenya | 2012 | The Health and Demographic Surveillance System (HDSS) is a longitudinal data collection process that systematically and continuously monitors population dynamics for a specified population in a geographically defined area that lacks an effective system for registering demographic information and vital events. It utilizes personal digital assistants and global positioning system devices                                                                                                                                                                                                                                                                                                                                                                             | Health information system                   |
| Empower Health software, Otieno et al;2020                               | Kenya | 2020 | On the mobile application, clinicians viewed patient data, provided direct patient feedback, and wrote electronic prescriptions accessible through participating pharmacies                                                                                                                                                                                                                                                                                                                                                                                                                                                                                                                                                                                                      | Service delivery                            |
| i-PUSH, Abajobir et al; 2021                                             | Kenya | 2021 | The Innovative Partnership for Universal Sustainable Healthcare ( <i>i</i> -PUSH) program, developed by AMREF Health Africa and PharmAccess Foundation (PAF), aims to empower low-income women of reproductive age and their families through innovative digital tools. This study aims to evaluate the impact of <i>i</i> -PUSH on maternal and child health care utilization, women's health including their knowledge, behavior, and uptake of respective services, as well as women's empowerment and financial protection. It also aims to evaluate the impact of the LEAP training tool on empowering and enhancing community health volunteers' health literacy and to evaluate the impact of the M-TIBA health wallet on savings for health and health insurance uptake. | Service delivery, Healthcare finance        |

|                                                                                                                                            |            |      |                                                                                                                                                                                                                                                                                                                                                    |                                             |
|--------------------------------------------------------------------------------------------------------------------------------------------|------------|------|----------------------------------------------------------------------------------------------------------------------------------------------------------------------------------------------------------------------------------------------------------------------------------------------------------------------------------------------------|---------------------------------------------|
| Inuka Coaching, Doukani et al 2021                                                                                                         | Kenya      | 2021 | A community health volunteer delivered problem-solving therapy mobile application based on the Friendship Bench 'Inuka Coaching' in Kenya: A pilot cohort study                                                                                                                                                                                    | Service delivery                            |
| PANDA (pregnancy and newborn diagnosis assessment) system, Garcia Vilaplana et al;2020                                                     | Madagascar | 2020 | An mHealth device that incorporates the WHO recommendations for antenatal care (ANC). Data, including personal and medical information, but also clinical data such as hypertension, anemia or HIV                                                                                                                                                 | Service delivery, Health information system |
| The Mobile Maternal Health Wallet (MMHW), Lacroze et al; 2021                                                                              | Madagascar | 2021 | Determine the impact on health outcomes, cost-effectiveness, feasibility, acceptability, and usefulness of mobile phone-based savings and payment service, the Mobile Maternal Health Wallet (MMHW), for skilled healthcare during pregnancy and delivery among women in Madagascar                                                                | Service delivery, Healthcare finance        |
| Smartphone Use for Cervical Cancer Screening in Low-Resource Countries, Catarino et al; 2015                                               | Madagascar | 2015 | The aim of this study was to evaluate the use of a smartphone for on- and off-site D-VIA diagnosis.                                                                                                                                                                                                                                                | Service delivery                            |
| A Smartphone-Based Approach for Triage of Human Papillomavirus, Urner et al; 2017                                                          | Madagascar | 2017 | The aim of the study was to evaluate the performances of digital smartphone-based visual inspection with acetic acid (D-VIA) and Lugol's iodine (D-VILI) for diagnosing cervical precancer and cancer.                                                                                                                                             | Service delivery                            |
| Smartphone digital images for the detection of cervical intraepithelial neoplasia of grade 2 or worse (CIN2+), Ricard-Gauthier et al; 2015 | Madagascar | 2015 | Our aim was to evaluate the feasibility and performance of smartphone digital images for the detection of cervical intraepithelial neoplasia of grade 2 or worse (CIN2+) as an adjunct to a conventional visual inspection approach with acetic acid (VIA) and Lugol's iodine (VILI), in comparison with detection by histopathologic examination. | Service delivery                            |
| A Mobile Health Data Collection System, Quercia et al; 2018                                                                                | Madagascar | 2018 | The aim of this study was to assess the feasibility of a mobile health (m-Health) data collection system to facilitate monitoring of women participating to cervical cancer screening campaign.                                                                                                                                                    | Health information system                   |

|                                                                                                                                           |         |      |                                                                                                                                                                                                                                                                                                                                                                                                                                                                                                                                                                                      |                                             |
|-------------------------------------------------------------------------------------------------------------------------------------------|---------|------|--------------------------------------------------------------------------------------------------------------------------------------------------------------------------------------------------------------------------------------------------------------------------------------------------------------------------------------------------------------------------------------------------------------------------------------------------------------------------------------------------------------------------------------------------------------------------------------|---------------------------------------------|
| NeoTree digital capture and quality improvement system Mgusha et al 2021                                                                  | Malawi  | 2021 | Mobile Perinatal Admissions App to describe patterns of admissions and outcomes in babies admitted to a Malawian neonatal                                                                                                                                                                                                                                                                                                                                                                                                                                                            | Service delivery, Health information system |
| StAR2D, Farmer et al 2021                                                                                                                 | Malawi  | 2021 | a 12-month two-arm randomised trial of SMS-text messaging and usual care in Cape Town, South Africa and Lilongwe, Malawi.                                                                                                                                                                                                                                                                                                                                                                                                                                                            | Service delivery                            |
| Computer-assisted digital chest X-ray technology, Twabi et al;2021                                                                        | Malawi  | 2021 | Computer-assisted digital chest X-ray technology                                                                                                                                                                                                                                                                                                                                                                                                                                                                                                                                     | Service delivery                            |
| Mobile Phone Text Message Reminders, Steinhardt et al; 2018                                                                               | Malawi  | 2018 | The Effect of Mobile Phone Text Message Reminders on Health Workers' Adherence to Malaria and Other Disease Case Management Guidelines in Malawi                                                                                                                                                                                                                                                                                                                                                                                                                                     | Service delivery                            |
| Accurate Real-Time Diagnosis of Lymphoproliferative Disorders in Malawi Through Clinicopathologic Teleconferences, Montgomery et al; 2016 | Malawi  | 2016 | We have established a laboratory in Malawi to support clinical and research efforts at a national teaching hospital. Consensus real-time diagnoses are rendered by local pathologists after weekly clinicopathologic teleconferences involving clinicians and pathologists from the United States and Malawi. Additional ancillary studies are then performed in the United States prior to final diagnosis.                                                                                                                                                                         | Service delivery                            |
| Tablet-Based Cervical Cancer Educational Intervention, Caster et al; 2017                                                                 | Malawi  | 2017 | We developed and implemented an interactive, tablet-based educational intervention to improve cervical cancer knowledge among women in rural Malawi                                                                                                                                                                                                                                                                                                                                                                                                                                  | Service delivery                            |
| Wellvis COVID triage tool, Owoyemi et al;2021                                                                                             | Nigeria | 2021 | We developed an eight-question triage tool using the Nigerian Centre for Disease Control surveillance case definitions for new coronavirus disease. Based on the assessed risk level we offered advice and guidance on the next steps. A user-administered tool such as this is vital to COVID19 control. It is also significant in relieving the burden on health systems, providing information on national health guidelines for prevention and control, fostering the participation of citizens, and giving them the next steps, pandemic control efforts become more effective. | Service delivery, Health information system |

|                                                                                                                                      |         |      |                                                                                                                                                                                                                                                                                                                                                    |                                              |
|--------------------------------------------------------------------------------------------------------------------------------------|---------|------|----------------------------------------------------------------------------------------------------------------------------------------------------------------------------------------------------------------------------------------------------------------------------------------------------------------------------------------------------|----------------------------------------------|
| EXTEND evaluation, Ebenso et al 2018                                                                                                 | Nigeria | 2018 | The eHealth interventions were implemented by 'InStrat' from March 2017 to March 2019, in collaboration with the State Ministries of Health in Ondo and Kano States and the DOH in the FCT. A successful pilot testing of VTR and CliniPAK apps in Ondo State in 2016 led to scaling up of eHealth interventions to Kano state and the FCT in 2017 | Service delivery, Human resources for health |
| Remote Teaching of Histopathology, Rotimi et al; 2017                                                                                | Nigeria | 2017 | To explore Web-based applications for pathology teaching in resource-limited sub-Saharan Africa                                                                                                                                                                                                                                                    | Service delivery, Human resources for health |
| Mobile phone short message service, Omole et al; 2018                                                                                | Nigeria | 2018 | To determine the impact of SMS (text messages) on maternal health behaviour in Ife-Ijesa zone of Osun State, Nigeria.                                                                                                                                                                                                                              | Service delivery                             |
| Neural Transfer Learning for Cry-based Diagnosis of Perinatal Asphyxia, Onu et al;2019                                               | Nigeria | 2019 | This study explores a neural transfer learning approach to developing accurate and robust models for identifying infants that have suffered from perinatal asphyxia                                                                                                                                                                                | Service delivery                             |
| PEERNaija, Ahonkhai et al; 2021                                                                                                      | Nigeria | 2021 | PEERNaija. Grounded in Social Cognitive Theory, and principles of contingency management and supportive accountability, PEERNaija delivers a multi-faceted behavioral intervention within a smartphone application to address important obstacles to adherence                                                                                     | Service delivery                             |
| Mobile digital quiz game for the promotion of malaria awareness,Chikwuocha et al; 2020                                               | Nigeria | 2020 | The development and testing of a mobile quiz game to promote malaria awareness, perceptions and appropriate practice                                                                                                                                                                                                                               | Service delivery                             |
| Clinical decision support algorithm, Center for Primary Care and Public Health (Unisante), University of Lausanne, Switzerland, 2022 | Rwanda  | 2022 | Dynamic Clinical Decision Support Algorithms to Manage Sick Children in Primary Health Care Settings in Rwanda                                                                                                                                                                                                                                     | Service delivery                             |
| RapidSMS-MCH, Ngabo et al; 2012                                                                                                      | Rwanda  | 2012 | Innovative SMS-based alert system (RapidSMS-MCH) to monitor pregnancy and reduce maternal and child deaths in Rwanda                                                                                                                                                                                                                               | Service delivery                             |
| Telepathology Triage, Mpunga et al; 2016                                                                                             | Rwanda  | 2016 | In this study, we present the first phase of an anatomic telepathology triage system, which was implemented and validated at the Butaro District Hospital in northern rural Rwanda.                                                                                                                                                                | Service delivery                             |



|                                                                                                                                                 |              |      |                                                                                                                                                                                                                                                        |                                                                |
|-------------------------------------------------------------------------------------------------------------------------------------------------|--------------|------|--------------------------------------------------------------------------------------------------------------------------------------------------------------------------------------------------------------------------------------------------------|----------------------------------------------------------------|
| Smartphone Application for Detecting Skin Cancers, Rubagumya et al; 2020                                                                        | Rwanda       | 2020 | We assessed the feasibility of using a mobile application (app) for detection of skin cancers among people with albinism.                                                                                                                              | Service delivery                                               |
| Uber for Blood, McVeigh, K. 2018. "Uber for Blood': How rwandan Delivery robots Are Saving lives." The Guardian                                 | Rwanda       | 2018 | A Silicon Valley robotics company has teamed up with the Rwandan health ministry to hasten the delivery of vital medicines to hospitals in remote areas                                                                                                | Service delivery, Access to medicines, vaccines and technology |
| Aviro Health App, <a href="https://borgenproject.org/aviro-health-in-south-africa/">https://borgenproject.org/aviro-health-in-south-africa/</a> | South Africa | 2012 | Aviro Health in South Africa began in 2012. It is a technology company based in Cape Town that develops digital innovations that assist both health care practitioners and patients                                                                    | Service delivery                                               |
| Tele-reading, Griggs et al ;2014                                                                                                                | South Africa | 2014 | World Federation of Pediatric Imaging (WFPI) volunteer outreach through tele-reading: the pilot project in South Africa                                                                                                                                | Service delivery                                               |
| TBDx, Applied Visual Systems, Inc, Swati et al;2016                                                                                             | South Africa | 2016 | Diagnostic algorithms using automated digital microscopy                                                                                                                                                                                               | Service delivery                                               |
| Mobile Health (mHealth) technologies for epilepsy, Davies et al 2021                                                                            | South Africa | 2021 | Technology-based home monitoring was investigated in an observational study of 40 children with refractory epilepsy or epilepsy associated with intellectual disability and/or behavior difficulties in South Africa                                   | Service delivery                                               |
| d-CXR, Moodley et al 2021                                                                                                                       | South Africa | 2021 | digital chest X-ray with computer-aided detection (CAD) software (d-CXR) for identifying undiagnosed TB in three primary health clinics in South Africa.                                                                                               | Service delivery                                               |
| momConnect, Pillay and Motsoaledi,2018                                                                                                          | South Africa | 2018 | MomConnect was established by the National Department of Health in 2014 to register pregnancies and provide pregnant and postpartum women with twice-weekly health information text messages as well as access to a help desk for queries and feedback | Service delivery                                               |
| StAR2D, Farmer et al 2021                                                                                                                       | South Africa | 2021 | a 12-month two-arm randomised trial of SMS-text messaging and usual care in Cape Town, South Africa and Lilongwe, Malawi.                                                                                                                              | Service delivery                                               |
| The Philani MOVIE, Adam et al 2021                                                                                                              | South Africa | 2021 | We measured the effects of an animated, mobile video series, the Philani MOBILE Video Intervention for Exclusive breastfeeding (MOVIE), delivered by a cadre of CHWs ("mentor mothers").                                                               | Service delivery                                               |

|                                                                                                                                                                                                                                                                                                                                        |              |      |                                                                                                                                                                                                                                                                                                                            |                                              |
|----------------------------------------------------------------------------------------------------------------------------------------------------------------------------------------------------------------------------------------------------------------------------------------------------------------------------------------|--------------|------|----------------------------------------------------------------------------------------------------------------------------------------------------------------------------------------------------------------------------------------------------------------------------------------------------------------------------|----------------------------------------------|
| Home-based intervention to test and start (HITS), Mathenjwa et al 2019                                                                                                                                                                                                                                                                 | South Africa | 2019 | a tablet-based male-targeted HIV decision support application                                                                                                                                                                                                                                                              | Service delivery                             |
| ProLife Moriarty et al; 2019                                                                                                                                                                                                                                                                                                           | South Africa | 2019 | The ProLife programme consists of an MI counselling strategy, delivered by lay health workers, augmented with subsequent SMS. Each MI session will be followed by twice-weekly SMS messages targeting treatment adherence, alcohol use and tobacco smoking, as appropriate                                                 | Service delivery                             |
| Mobile tracking of those with coronavirus, <a href="https://www.reuters.com/article/health-coronavirus-telkom-sa/s-africa-launches-mobile-tracking-of-those-with-coronavirus-idUSL8N2BQ61L">https://www.reuters.com/article/health-coronavirus-telkom-sa/s-africa-launches-mobile-tracking-of-those-with-coronavirus-idUSL8N2BQ61L</a> | South Africa | 2020 | South Africa's Telkom, Samsung and the government have teamed up to develop a track and trace database to identify the whereabouts of people who may have contracted coronavirus.                                                                                                                                          | Service delivery, Health information system  |
| Electronic booking system, Booyse et al; 2020                                                                                                                                                                                                                                                                                          | South Africa | 2020 | To evaluate the ability of the booking system to appropriately prioritise and accommodate clinically appropriate patients for an urgent gastroscopy within 2 weeks at Worcester Provincial Hospital (WPH)                                                                                                                  | Service delivery, Health information system  |
| The Kilimanjaro Method, Yeates et al; 2016                                                                                                                                                                                                                                                                                             | Tanzania     | 2016 | We hypothesized that a smartphone camera and use of cervical image transfer for real-time mentorship by experts located distantly across a closed user group through a commercially available smartphone application would be both feasible and effective in enhancing VIA skills among CCS providers in Tanzania          | Service delivery, Human resources for health |
| The CAD4TB software is a computer-aided detection system Breuninger et al;2014                                                                                                                                                                                                                                                         | Tanzania     | 2014 | The CAD4TB software is a computer-aided detection system for Automatic interpretation of chest x-Rays in TB diagnosis                                                                                                                                                                                                      | Service delivery                             |
| Mobile phone Communication, Lund et al; 2012                                                                                                                                                                                                                                                                                           | Tanzania     | 2012 | Mobile phones as a health communication tool to improve skilled attendance at delivery in Zanzibar: a cluster-randomised controlled trial                                                                                                                                                                                  | Service delivery                             |
| InfoSpots, Holst et al; 2021                                                                                                                                                                                                                                                                                                           | Tanzania     | 2021 | Installing community information spots (InfoSpots) with access to the internet and a locally stored digital health education platform (the platform) in Migoli and Izazi, Tanzania. The objective of this case study was to explore the perspectives and experiences of InfoSpot users and non-users in these communities. | Service delivery                             |

|                                                                                                                                      |          |      |                                                                                                                                                                                                                                                                                                                                                                                               |                                                                 |
|--------------------------------------------------------------------------------------------------------------------------------------|----------|------|-----------------------------------------------------------------------------------------------------------------------------------------------------------------------------------------------------------------------------------------------------------------------------------------------------------------------------------------------------------------------------------------------|-----------------------------------------------------------------|
| Clinical decision support algorithm, Center for Primary Care and Public Health (Unisante), University of Lausanne, Switzerland, 2022 | Tanzania | 2022 | Dynamic Clinical Decision Support Algorithms to Manage Sick Children in Primary Health Care Settings in Tanzania                                                                                                                                                                                                                                                                              | Service delivery                                                |
| SMS text messaging app, Siedner et al; 2015                                                                                          | Uganda   | 2015 | The trial evaluated the efficacy of a SMS text messaging app to notify PLWH of their laboratory results and request return to care for those with abnormal test results.                                                                                                                                                                                                                      | Service delivery                                                |
| Low-cost ruggedized Android tablets to augment in-service training of community health worker Stiles et al;2021                      | Uganda   | 2021 | A mobile health (mHealth) assisted Integrated Community Case Management (iCCM) refresher training programme for CHWs in Mukono, Uganda                                                                                                                                                                                                                                                        | Service delivery, Human resources for health                    |
| Mobile Phone Consultations, Ayiasi et al 2016                                                                                        | Uganda   | 2016 | Effect of Village Health Team Home Visits and Mobile Phone Consultations on Maternal and Newborn Care Practices in Masindi and Kiryandongo, Uganda: A Community-Intervention Trial                                                                                                                                                                                                            | Service delivery                                                |
| mTrac UNICEF Uganda, 2011                                                                                                            | Uganda   | 2011 | mTrac is used by health facility workers to submit routine, weekly health surveillance data by SMS using their own basic mobile phones. mTrac indicators include notifiable diseases, stock levels for eight tracer medicines, and maternal and neonatal deaths. This data is automatically integrated into DHIS2 for further analysis.                                                       | Service delivery , Access to medicines, vaccines and technology |
| mHealth application to strengthening pharmaceutical systems, Namisango et al; 2016                                                   | Uganda   | 2016 | n electronic application was implemented as part of palliative care services at two settings in Uganda; a rural hospital and an urban hospice. Measures of the completeness of data capture, time efficiency of activities and medicines stock and waste management were taken pre- and post-implementation to identify changes to practice arising from the introduction of the application. | Service delivery, Access to medicines, vaccines and technology  |
| Novel Mobile Phone Application to Improve Palliative Home-Care, Harding et al; 2021                                                  | Uganda   | 2021 | This study aimed to design a mobile phone application (app) to enable or improve communication between family caregivers, community caregivers, and palliative care teams; to evaluate its acceptability, processes,                                                                                                                                                                          | Service delivery                                                |

|                                                                                     |           |      |                                                                                                                                                                                                                                                                                                                               |                                              |
|-------------------------------------------------------------------------------------|-----------|------|-------------------------------------------------------------------------------------------------------------------------------------------------------------------------------------------------------------------------------------------------------------------------------------------------------------------------------|----------------------------------------------|
|                                                                                     |           |      | and mechanisms of action; and to propose refinements.                                                                                                                                                                                                                                                                         |                                              |
| Smartphone strategies for cervical cancer screening, Asgary et al;2020              | Swaziland | 2020 | We implemented smartphone-based VIA that included standard VIA training, adapted refresher, and 6-month mHealth mentorship, sequentially, in the rural Shiselweni region of Eswatini. A remote expert reviewer provided diagnostic and management feedback on patients' cervical images, which were reviewed weekly by nurses | Service delivery, Human resources for health |
| Retinopathy AI screening, Bellemo et.al 2019                                        | Zambia    | 2019 | An artificial intelligence (AI) model using deep learning in a population-based diabetic retinopathy screening programme in Zambia                                                                                                                                                                                            | Service delivery                             |
| HealthTrax, Hong et al; 2015                                                        | Zambia    | 2015 | A new tool to identify and navigate dirt roads for health outreach work in Southern Zambia through GPS tracking                                                                                                                                                                                                               | Service delivery                             |
| Automatic software (CAD4TB 5) in chest X-ray (CXR), Melendez et al; 2017            | Zambia    | 2017 | Compare the performance of automatic software (CAD4TB 5) in chest X-ray (CXR) reading with that of field (general practitioners) and central (radiologists) readers.                                                                                                                                                          | Service delivery                             |
| Interactive digital tablet-based counselling, Thomas et al;2019                     | Zimbabwe  | 2019 | This pilot research trial aims to provide an initial evaluation of the impact of an interactive digital tabletbased counselling session, correcting risk perception, and addressing ambiguity around availability, usability, and effectiveness of PrEP.                                                                      | Service delivery                             |
| Novel Mobile Phone Application to Improve Palliative Home-Care, Harding et al; 2021 | Zimbabwe  | 2021 | This study aimed to design a mobile phone application (app) to enable or improve communication between family caregivers, community caregivers, and palliative care teams; to evaluate its acceptability, processes, and mechanisms of action; and to propose refinements.                                                    | Service delivery                             |

Table S2: Supplementary material : Country Distribution of digital health interventions according to the health systems strengthening building blocks

| <b>Country</b>                        | <b>Service delivery</b> | <b>Health Information System</b> | <b>Human Resources for Health</b> | <b>Access to Medicines</b> | <b>Leadership and Governance</b> | <b>Health care finance</b> | <b>Total</b> |
|---------------------------------------|-------------------------|----------------------------------|-----------------------------------|----------------------------|----------------------------------|----------------------------|--------------|
| Angola                                | 4 (50)                  | 1(12.5)                          | 1(12.5)                           | 2 (50)                     | 0 (0.0)                          | 0 (0.0)                    | 8            |
| Benin                                 | 11 (61.1)               | 3 (16.7)                         | 2 (11.1)                          | 2 (11.1)                   | 0 (0.0)                          | 0 (0.0)                    | 18           |
| Botswana                              | 6 (66.7)                | 1 (11.1)                         | 1 (11.1)                          | 0 (0.0)                    | 0 (0.0)                          | 1 (11.1)                   | 9            |
| Burkina Faso                          | 8 (57.1)                | 5 (35.7)                         | 1 (7.1)                           | 0 (0.0)                    | 0 (0.0)                          | 0 (0.0)                    | 14           |
| Burundi                               | 10 (71.4)               | 3 (21.4)                         | 1 (7.1)                           | 0 (0.0)                    | 0 (0.0)                          | 0 (0.0)                    | 14           |
| Cabo Verde                            | 14 (63.6)               | 4 (18.2)                         | 3 (13.6)                          | 1 (4.5)                    | 0 (0.0)                          | 0 (0.0)                    | 22           |
| Cameroon                              | 4 (57.1)                | 1 (14.3)                         | 0 (0.0)                           | 0 (0.0)                    | 1 (14.3)                         | 1 (14.3)                   | 7            |
| Central African Republic              | 2 (100)                 | 0 (0.0)                          | 0 (0.0)                           | 0 (0.0)                    | 0 (0.0)                          | 0 (0.0)                    | 2            |
| Chad                                  | 0 (0.0)                 | 1 (100)                          | 0 (0.0)                           | 0 (0.0)                    | 0 (0.0)                          | 0 (0.0)                    | 1            |
| Congo                                 | 0 (0.0)                 | 1 (100)                          | 0 (0.0)                           | 0 (0.0)                    | 0 (0.0)                          | 0 (0.0)                    | 1            |
| Congo, the Democratic Republic of the | 5 (71.4)                | 1 (14.3)                         | 0 (0.0)                           | 1 (14.3)                   | 0 (0.0)                          | 0 (0.0)                    | 7            |
| Côte d'Ivoire                         | 25 (69.4)               | 2 (5.6)                          | 4 (11.1)                          | 3 (8.3)                    | 0 (0.0)                          | 2 (5.6)                    | 36           |
| Djibouti                              | 0 (0.0)                 | 1 (100)                          | 0 (0.0)                           | 0 (0.0)                    | 0 (0.0)                          | 0 (0.0)                    | 1            |
| Ethiopia                              | 68 (56.7)               | 28 (23.3)                        | 10 (8.3)                          | 8 (6.7)                    | 0 (0.0)                          | 6 (5.0)                    | 120          |
| Gabon                                 | 2 (100)                 | 0 (0.0)                          | 0 (0.0)                           | 0 (0.0)                    | 0 (0.0)                          | 0 (0.0)                    | 2            |
| Gambia                                | 9 (69.2)                | 2 (15.4)                         | 1 (7.7)                           | 1 (7.7)                    | 0 (0.0)                          | 0 (0.0)                    | 13           |
| Ghana                                 | 21 (60)                 | 6 (17.1)                         | 6 (17.1)                          | 1 (2.9)                    | 0 (0.0)                          | 1 (2.9)                    | 35           |
| Guinea                                | 2 (28.6)                | 4 (57.1)                         | 0 (0.0)                           | 1 (14.3)                   | 0 (0.0)                          | 0 (0.0)                    | 7            |
| Guinea-Bissau                         | 0 (0.0)                 | 1 (100)                          | 0 (0.0)                           | 0 (0.0)                    | 0 (0.0)                          | 0 (0.0)                    | 1            |
| Kenya                                 | 43 (64.2)               | 16 (23.9)                        | 0 (0.0)                           | 4 (6.0)                    | 0 (0.0)                          | 4 (6.0)                    | 67           |
| Lesotho                               | 11 (52.4)               | 7 (33.3)                         | 0 (0.0)                           | 2 (9.5)                    | 0 (0.0)                          | 1 (4.8)                    | 21           |
| Liberia                               | 1 (33.3)                | 2 (66.7)                         | 0 (0.0)                           | 0 (0.0)                    | 0 (0.0)                          | 0 (0.0)                    | 3            |
| Madagascar                            | 17 (60.7)               | 6 (21.4)                         | 3 (10.7)                          | 0 (0.0)                    | 0 (0.0)                          | 2 (7.1)                    | 28           |
| Malawi                                | 37 (59.7)               | 17 (27.4)                        | 3 (4.8)                           | 4 (6.5)                    | 0 (0.0)                          | 1 (1.6)                    | 62           |
| Mali                                  | 17 (63.0)               | 5 (18.5)                         | 3 (11.1)                          | 1 (3.7)                    | 0 (0.0)                          | 1 (3.7)                    | 27           |

|                             |           |           |          |          |         |         |     |
|-----------------------------|-----------|-----------|----------|----------|---------|---------|-----|
| Mauritania                  | 11 (61.1) | 3 (16.7)  | 2 (11.1) | 1 (5.6)  | 0 (0.0) | 1 (5.6) | 18  |
| Mozambique                  | 5 (33.3)  | 4 (26.7)  | 2 (13.3) | 3 (20.0) | 1 (6.7) | 0 (0.0) | 15  |
| Namibia                     | 2 (66.7)  | 1 (33.3)  | 0 (0.0)  | 0 (0.0)  | 0 (0.0) | 0 (0.0) | 3   |
| Niger                       | 16(64.0)  | 4 (16.0)  | 3 (12.0) | 1 (4.0)  | 0 (0.0) | 1 (4.0) | 25  |
| Nigeria                     | 24 (61.5) | 5 (12.8)  | 5 (12.8) | 2 (5.1)  | 0 (0.0) | 3 (7.7) | 39  |
| Rwanda                      | 22 (71.0) | 5 (16.1)  | 2 (6.5)  | 1 (3.2)  | 1 (3.2) | 0 (0.0) | 31  |
| Sao Tome and Principe       | 1 (50.0)  | 1 (50.0)  | 0 (0.0)  | 0 (0.0)  | 0 (0.0) | 0 (0.0) | 2   |
| Senegal                     | 22 (64.7) | 5 (14.7)  | 3 (8.8)  | 3 (8.8)  | 0 (0.0) | 1 (2.9) | 34  |
| Sierra Leone                | 8 (36.4)  | 11 (50.0) | 3 (13.6) | 0 (0.0)  | 0 (0.0) | 0 (0.0) | 22  |
| South Africa                | 24 (64.9) | 12 (32.4) | 1 (2.7)  | 0 (0.0)  | 0 (0.0) | 0 (0.0) | 37  |
| South Sudan                 | 5 (83.3)  | 1 (16.7)  | 0 (0.0)  | 0 (0.0)  | 0 (0.0) | 0 (0.0) | 6   |
| Sudan                       | 11 (61.1) | 4 (22.2)  | 1 (5.6)  | 1 (5.6)  | 0 (0.0) | 1 (5.6) | 18  |
| Eswatini                    | 2 (50.0)  | 0 (0.0)   | 1 (25.0) | 1 (25.0) | 0 (0.0) | 0 (0.0) | 4   |
| Tanzania                    | 3 (75.0)  | 0 (0.0)   | 1 (25.0) | 0 (0.0)  | 0 (0.0) | 0 (0.0) | 4   |
| Tanzania                    | 2 (100.0) | 0 (0.0)   | 0 (0.0)  | 0 (0.0)  | 0 (0.0) | 0 (0.0) | 2   |
| Togo                        | 3 (75.0)  | 1 (25.0)  | 0 (0.0)  | 0 (0.0)  | 0 (0.0) | 0 (0.0) | 4   |
| Uganda                      | 53 (59.6) | 22 (24.7) | 6 (6.7)  | 7 (7.9)  | 0 (0.0) | 1 (1.1) | 89  |
| United Republic of Tanzania | 23 (54.8) | 14 (33.3) | 1 (2.4)  | 3 (7.1)  | 0 (0.0) | 1 (2.4) | 42  |
| Zambia                      | 26 (66.7) | 9 (23.1)  | 2 (5.1)  | 2 (5.1)  | 0 (0.0) | 0 (0.0) | 39  |
| Zimbabwe                    | 23 (76.7) | 4 (13.3)  | 3 (10.0) | 0 (0.0)  | 0 (0.0) | 0 (0.0) | 30  |
| Total                       | 603       | 224       | 75       | 56       | 3       | 29      | 990 |

Table S3: Supplementary material: Digital Health Interventions used to strengthen service delivery in sub-Saharan Africa

| Name/Reference/<br>Point of contact                                   | Target -User |           |          |               | Stage of development |       |             |         | Addressed Health System Challenge                                 | Aligned Systems Category                                                                                         |
|-----------------------------------------------------------------------|--------------|-----------|----------|---------------|----------------------|-------|-------------|---------|-------------------------------------------------------------------|------------------------------------------------------------------------------------------------------------------|
|                                                                       | Clients      | Providers | Managers | Data Services | Informal             | Pilot | Established | Unknown |                                                                   |                                                                                                                  |
| Projecto Exemplar Elon Musk, elon@tesla.com                           | Yes          |           |          |               |                      | Yes   |             |         | 5.Utilization                                                     | D. Client communications system                                                                                  |
| IRS - Cunene Sergio Lopes, sergio@mentor-initiative.net               |              |           | Yes      |               |                      | Yes   |             |         | 1. Information, 3. Quality, 5. Utilization                        | F. Community-based information system, V. Public health and disease surveillance, W. Research information system |
| OpenLMIS Angola (SIGLOFA) Rebecca Alban, info@openlmis.org            |              |           | Yes      |               |                      |       | Yes         |         | 1. Information, 2. Availability, 6. Efficiency, 8. Accountability | T. Logistics management information system                                                                       |
| Angola immunization supply chain Neeraj Thakare, neeraj@logistimo.com |              |           | Yes      |               |                      |       | Yes         |         | 1. Information, 2.Availability, 6. Efficiency, 8. Accountability  | T. Logistics management information system                                                                       |
| The Safe Delivery App in Benin Lauren Bellhouse, lauren@maternity.dk  |              | Yes       |          |               |                      |       | Yes         |         | 2. Availability, 3. Quality                                       | S. Learning and training system, Q. Knowledge management system                                                  |
| Apprendre a Vivre Benin Uju Ofomata, uju.ofomata@oneworld.org         | Yes          | Yes       |          |               |                      |       |             | Yes     | 1. Information, 3. Quality, 5. utilization, 8. Accountability     | C. Client applications, S. Learning and training system                                                          |
| OpenLMIS Benin (SIIL) Rebecca Alban, info@openlmis.org                |              | Yes       | Yes      |               |                      |       | Yes         |         | 1. Information, 2. Availability, 6. Efficiency, 8. Accountability | T. Logistics management and information system                                                                   |

|                                                                                                                                                                                       |     |     |     |  |  |     |     |     |                                                            |                                                                                                   |
|---------------------------------------------------------------------------------------------------------------------------------------------------------------------------------------|-----|-----|-----|--|--|-----|-----|-----|------------------------------------------------------------|---------------------------------------------------------------------------------------------------|
| Integrated e-Diagnostic Approach Thierry Agagliate, tag@tdh.ch                                                                                                                        |     | Yes |     |  |  |     | Yes |     | 1. Information, 3. Quality                                 | N. Health management information system, Q. Knowledge management system,                          |
| suivi des diabétiques Sanou Mohamed, sanou45@gmail.com                                                                                                                                |     | Yes |     |  |  |     |     | Yes | 2. Availability, 5. Utilization                            | D. Client communications system                                                                   |
| Suivi des malades diabetiques au Burkina Sanou Abdoulaye, sanou45@gmail.com                                                                                                           | Yes |     |     |  |  |     |     | Yes | 2. Availability, 7. Cost                                   | E. Clinical terminology and classifications, Y. Telemedicine                                      |
| Projet Télé cardiologie Ouedraogo, sanou60@gmail.com                                                                                                                                  | Yes | Yes |     |  |  |     |     | Yes | 2. Availability, 7. Cost                                   | Y. Telemedicine                                                                                   |
| Bio-fortified Value Chains for Improved Maternal and Child Nutrition (B4MCN) Bertin Nduwayo, bertin_nduwayo@wvi.org                                                                   | Yes |     |     |  |  | Yes |     |     | 2. Availability, 3. Quality, 6. Efficiency, 7. Cost        | F. Community-based Information System. V. Public health and disease surveillance, Y. Telemedicine |
| Implementation of a Performance-Based Financing Data System for Cameroon - using the open source tool Hesabu Mfouapon N Henock, National Data Manager of PBF, henockmfouapon@yahoo.fr |     |     | Yes |  |  |     | Yes |     | 1. Information, 3. Quality                                 | C. Client applications, N. Health management information system                                   |
| Bafia District Hospital Armand Mpassy-Nzoumba, armandmpassy@yahoo.com                                                                                                                 |     | Yes | Yes |  |  | Yes |     |     | 1. Information, 2. Availability, 3. Quality, 6. Efficiency | K. Facility management information system                                                         |
| Bikop Health Center Armand MPASSY, GNU Solidario, armandmpassy@yahoo.com                                                                                                              |     |     | Yes |  |  | Yes |     |     | 1. Information, 2. Availability, 3. Quality, 6. Efficiency | K. Facility management information System                                                         |
| Klarah Ginyu Innocentia Kwalar, hello@klarah.com                                                                                                                                      |     | Yes |     |  |  | Yes |     |     | 2. Availability, 5. Utilization, 6. Efficiency,            | K. Facility management system                                                                     |



|                                                                                                                                                   |     |     |     |  |  |     |     |     |                                                                   |                                                                                                       |
|---------------------------------------------------------------------------------------------------------------------------------------------------|-----|-----|-----|--|--|-----|-----|-----|-------------------------------------------------------------------|-------------------------------------------------------------------------------------------------------|
| The Prevention Pack Program: ensuring availability of post-rape medicines in rural clinics Jean Armas, jean.armas@globalstrategies.org            |     | Yes | Yes |  |  | Yes |     |     | 2.Availability, 5. Utilization,                                   | I. Emergency response system                                                                          |
| Connecting persons seeking information about HIV/AIDS to HIV medical and social service organizations Jean Armas, jean.armas@globalstrategies.org | Yes |     |     |  |  | Yes |     |     | 1. Information                                                    | C. Client applications L. Geographic information system, P. Identification registries and directories |
| Meilleur santé accessible à tous EPENGE DJONGA EMMANUEL, Falbalarde@gmail.com                                                                     | Yes |     |     |  |  |     |     | Yes | 2. Availability, 5. Utilization ,7. Cost                          | C. Client applications. Y. Telemedicine                                                               |
| OpenELIS Global in Cote d'Ivoire Casey Iiams-Hauser, caseyi@uw.edu                                                                                |     | Yes | Yes |  |  |     |     | Yes | 1. Information, 2. Availability, 6.Efficiency                     | R. Laboratory an diagnostics information system                                                       |
| OpenLMIS Cote d'Ivoire (eSIGL) Rebecca Alban, info@openlmis.org                                                                                   |     | Yes | Yes |  |  |     | Yes |     | 1. Information, 2. Availability, 6. Efficiency, 8. Accountability | T. Logistics management information system                                                            |
| COVID-19 Vaccine Allocation App Anubhuti Mishra, anubhuti.mishra@thepalladiumgroup.com                                                            |     |     | Yes |  |  | Yes |     |     | 1. Information, 2. Availability, 6. Efficiency,                   | F. Community-based Information System                                                                 |
| Hiwot: Addressing Maternal & Neonatal Health Stefanie Kot, skot@d-tree.org                                                                        |     | Yes |     |  |  | Yes |     |     | 1. information, 3. Quality, 6. Efficiency                         | F. Community-based Information System,.Q. Knowledge management system,S. Learning and training system |
| OppiaMobile Alex Little, consult@alexlittle.net                                                                                                   |     | Yes |     |  |  | Yes |     |     | 3. Quality                                                        | S. Learning and training system                                                                       |

|                                                                                                                         |     |     |     |  |  |     |     |     |                                                                   |                                                                                          |
|-------------------------------------------------------------------------------------------------------------------------|-----|-----|-----|--|--|-----|-----|-----|-------------------------------------------------------------------|------------------------------------------------------------------------------------------|
| Medical Incident Reporting System Innovation (MIRSI) Fiseha Tesfaw, fiseha.tesfaw@jhpiego.org                           |     | Yes |     |  |  | Yes |     | Yes | 1. Information, 4 Acceptability                                   | K. Facility management information system                                                |
| Blood Safety Strengthening Programme: Blood Safety Information System (BSIS) Rhonwyn Cornell, rhonwyn.cornell@jembi.org |     |     | Yes |  |  |     |     | Yes | 1. Information, 2. Availability, 3 Quality, 6. Efficiency         | H. Electronic medical record,X. Shared health record and health information repositories |
| Tenaye Federal Ministry of Health, dha@moh.gov.et                                                                       | Yes |     |     |  |  |     | Yes |     | 1 Information,                                                    | C. Client applications,Q. Knowledge management system                                    |
| Tena PIMS Federal Ministry of Health, dha@moh.gov.et                                                                    |     | Yes |     |  |  |     | Yes |     | 1. Information, 6. Efficiency,                                    | H. Electronic medical record                                                             |
| SuperHIM (Super HIMS health information management system) Federal Ministry of Health, dha@moh.gov.et                   |     | Yes | Yes |  |  |     | Yes |     | 1. Information, 6. Efficiency                                     | K. Facility management information system                                                |
| SmartEMS (Samrt Electronic Medical System) Federal Ministry of Health, dha@moh.gov.et                                   |     | Yes | Yes |  |  |     | Yes |     | 1. Information, 6. Efficiency                                     | H. Electronic medical record                                                             |
| Quntimed and Quantitb, Federal Ministry of Health, dha@moh.gov.et                                                       |     |     | Yes |  |  |     | Yes |     | 1. Information, 2. Availability, 6. Efficiency, 8. Accountability | T. Logistics management information system                                               |
| PRS (Patient Registration System) Federal Ministry of Health, dha@moh.gov.et                                            |     | Yes |     |  |  |     | Yes |     | 1. Information                                                    | H. Electronic medical record                                                             |
| PrimeCare electronic health record Federal Ministry of Health, dha@moh.gov.et                                           |     | Yes |     |  |  |     | Yes |     | 1. Information, 6. Efficiency                                     | H. Electronic medical record                                                             |

|                                                                                              |     |     |     |  |  |  |     |  |                                                                   |                                                                                           |
|----------------------------------------------------------------------------------------------|-----|-----|-----|--|--|--|-----|--|-------------------------------------------------------------------|-------------------------------------------------------------------------------------------|
| Pipeline Federal Ministry of Health, dha@moh.gov.et                                          |     |     | Yes |  |  |  | Yes |  | 1. Information, 2. Availability, 6. Efficiency, 8. Accountability | T. Logistics management information system                                                |
| PaxscanL06 Federal Ministry of Health, dha@moh.gov.et                                        |     | Yes |     |  |  |  | Yes |  | 1. Information, 3. Quality                                        | R. Laboratory and diagnostics information system                                          |
| Patient Registration Software Federal Ministry of Health, dha@moh.gov.et                     |     | Yes |     |  |  |  | Yes |  | 1. Information                                                    | H. Electronic medical record                                                              |
| PACS (Picture Archiving and communication System) Federal Ministry of Health, dha@moh.gov.et |     | Yes |     |  |  |  | Yes |  | 1. Information, 6. Efficiency                                     | R. Laboratory and diagnostics information system                                          |
| OTRS (Online Ticket Registration System) Federal Ministry of Health, dha@moh.gov.et          |     |     | Yes |  |  |  | Yes |  | 6. Efficiency                                                     | K. Facility management information System                                                 |
| Orbit Health Federal Ministry of Health, dha@moh.gov.et                                      |     | Yes |     |  |  |  | Yes |  | 1. Information, 6. Efficiency                                     | H. Electronic medical record, X. Shared health record and health information repositories |
| OR management system Federal Ministry of Health, dha@moh.gov.et                              |     | Yes |     |  |  |  | Yes |  | 1. Information                                                    | K. Facility management information System                                                 |
| Open Clinic Federal Ministry of Health, dha@moh.gov.et                                       |     | Yes |     |  |  |  | Yes |  | 1. Information, 6. Efficiency                                     | H. Electronic medical record, K. Facility management system                               |
| mHealth Federal Ministry of Health, dha@moh.gov.et                                           |     | Yes |     |  |  |  | Yes |  | 1. Information, 3. Quality                                        | S. Learning and training system                                                           |
| MFR Federal Ministry of Health, dha@moh.gov.et                                               | Yes |     |     |  |  |  | Yes |  | 1. Information                                                    | P. Identification registries and directories                                              |
| MEMS (Medical equipment management system) Federal Ministry of Health, dha@moh.gov.et        |     |     | Yes |  |  |  | Yes |  | 6. Efficiency, 8. Accountability                                  | T. Logistics management information system                                                |

|                                                                                               |  |     |     |  |  |  |     |  |                                                                   |                                                                                           |
|-----------------------------------------------------------------------------------------------|--|-----|-----|--|--|--|-----|--|-------------------------------------------------------------------|-------------------------------------------------------------------------------------------|
| Medicine Registration System Federal Ministry of Health, dha@moh.gov.et                       |  |     | Yes |  |  |  | Yes |  | 1. Information, 3. Quality                                        | P. Identification registries and directories, U. Pharmacy Information System              |
| KPI Survey Database Federal Ministry of Health, dha@moh.gov.et                                |  |     | Yes |  |  |  | Yes |  | 1. Information                                                    | W. Research information system                                                            |
| IVR (Interactive voice response) Federal Ministry of Health, dha@moh.gov.et                   |  | Yes |     |  |  |  | Yes |  | 1. Information, 2. Availability, 6. Efficiency, 8. Accountability | B. Civil registration and vital statistics, T. Logistics management information system    |
| Intellicare Federal Ministry of Health, dha@moh.gov.et                                        |  | Yes | Yes |  |  |  | Yes |  | 1. Information, 3. Quality                                        | K. Facility management information system                                                 |
| HMIS Brisk Federal Ministry of Health, dha@moh.gov.et                                         |  | Yes | Yes |  |  |  | Yes |  | 1. Information, 6. Efficiency                                     | H. Electronic medical record                                                              |
| Gx alert Federal Ministry of Health, dha@moh.gov.et                                           |  | Yes |     |  |  |  | Yes |  | 1. Information, 6. Efficiency                                     | R. Laboratory and diagnostics information system                                          |
| Green Stone Digital library Federal Ministry of Health, dha@moh.gov.et                        |  | Yes |     |  |  |  | Yes |  | 1. Information                                                    | Q. Knowledge management system                                                            |
| Fleet management system Federal Ministry of Health, dha@moh.gov.et                            |  |     | Yes |  |  |  | Yes |  | 6. Efficiency, 8. Accountability                                  | T. Logistics management information system                                                |
| EPS pharmaceutical information systems ( ARSMBDHS) Federal Ministry of Health, dha@moh.gov.et |  |     | Yes |  |  |  | Yes |  | 1. Information, 2. Availability, 6. Efficiency, 8. Accountability | T. Logistics management information system                                                |
| EMR - ART Module Federal Ministry of Health, dha@moh.gov.et                                   |  | Yes |     |  |  |  | Yes |  | 1. Information, 6. Efficiency                                     | H. Electronic medical record, X. Shared health record and health information repositories |
| EGBLS Federal Ministry of Health, dha@moh.gov.et                                              |  |     | Yes |  |  |  | Yes |  | 1. Information                                                    | K. Facility management information system, T. Logistics management information system     |

|                                                                                                 |  |     |     |  |  |  |     |  |                                                                   |                                                                                          |
|-------------------------------------------------------------------------------------------------|--|-----|-----|--|--|--|-----|--|-------------------------------------------------------------------|------------------------------------------------------------------------------------------|
| ECHMIS (Electronic Communication HMIS) Federal Ministry of Health, dha@moh.gov.et               |  | Yes |     |  |  |  | Yes |  | 1. Information, 2. Availability, 6. Efficiency, 8. Accountability | T. Logistics management information system                                               |
| eCHIS - New Federal Ministry of Health, dha@moh.gov.et                                          |  | Yes |     |  |  |  | Yes |  | 1. Information, 3. Quality, 6. Efficiency                         | F. Community based information system, Q. Knowledge management system,                   |
| E&RIS (Emergency and referral information system) Federal Ministry of Health, dha@moh.gov.et    |  |     | Yes |  |  |  | Yes |  | 1. Information, 6. Efficiency                                     | P. Identification registries and directories, T. Logistics management information system |
| DHMS (Digital Hospital Management System) Federal Ministry of Health, dha@moh.gov.et            |  | Yes | Yes |  |  |  | Yes |  | 1. Information, 6. Efficiency                                     | K. Facility management information system                                                |
| Dagu Federal Ministry of Health, dha@moh.gov.et                                                 |  | Yes |     |  |  |  | Yes |  | 1. Information, 2. Availability, 6. Efficiency, 8. Accountability | T. Logistics management information system                                               |
| Cnet Federal Ministry of Health, dha@moh.gov.et                                                 |  |     | Yes |  |  |  | Yes |  | 1. Information, 2. Availability, 6. Efficiency, 8. Accountability | T. Logistics management information system                                               |
| CMMS (Computerized Maintenance Management System) Federal Ministry of Health, dha@moh.gov.et    |  |     | Yes |  |  |  | Yes |  | 1. Information, 2. Availability, 8. Accountability                | T. Logistics management information system                                               |
| CCEIT Federal Ministry of Health, dha@moh.gov.et                                                |  | Yes |     |  |  |  | Yes |  | 1. Information, 2. Availability, 8. Accountability                | T. Logistics management information system                                               |
| CBHI (community based health insurance system ) Federal Ministry of Health, dha@moh.gov.et      |  | Yes |     |  |  |  | Yes |  | 1. Information, 7. Cost                                           | M. Health finance and insurance information system                                       |
| APTS (auditable pharmaceuticals transactions system) Federal Ministry of Health, dha@moh.gov.et |  |     | Yes |  |  |  | Yes |  | 1. Information, 2. Availability, 6. Efficiency, 8. Accountability | K. Facility management information system, U. Pharmacy information system                |

|                                                                                                                                                            |     |     |     |  |  |     |     |     |                                                         |                                                                                           |
|------------------------------------------------------------------------------------------------------------------------------------------------------------|-----|-----|-----|--|--|-----|-----|-----|---------------------------------------------------------|-------------------------------------------------------------------------------------------|
| Antroplus Federal Ministry of Health, dha@moh.gov.et                                                                                                       |     | Yes |     |  |  |     | Yes |     | 1. Information                                          | R. Laboratory and diagnostics information system                                          |
| AGHMC EMR Federal Ministry of Health, dha@moh.gov.et                                                                                                       |     | Yes |     |  |  |     | Yes |     | 1. Information, 6. Efficiency                           | H. Electronic medical record                                                              |
| ADR (report online) Federal Ministry of Health, dha@moh.gov.et                                                                                             |     | Yes |     |  |  |     | Yes |     | 1. Information,                                         | U. Pharmacy Information System                                                            |
| Admission Referral Service Federal Ministry of Health, dha@moh.gov.et                                                                                      |     | Yes |     |  |  |     | Yes |     | 1. Information, 6. Efficiency                           | K. Facility management information system                                                 |
| Life-saving Mobile Health Kits (LMHK) for Obstetric Care in Remote Areas Belay Haffa, belay_haffa@wvi.org                                                  |     | Yes |     |  |  | Yes |     |     | 2. Availability, 5. Utilization, 6. Efficiency, 7. Cost | F. Community-based Information System, Q. Knowledge Management system, Y. Telemedicine    |
| Implementation of a LIMS based on GNU Health at the International Center for Medical Research of Franceville Armand Mpassy-Nzoumba, armandmpassy@yahoo.com |     | Yes |     |  |  | Yes |     |     | 1. Information, 6. Efficiency,                          | R. Laboratory management information system                                               |
| Suivi des malades diabétiques Mr Dupont, dupont58@gmail.com                                                                                                | Yes | Yes |     |  |  |     |     | Yes | 1. Information, 6. Efficiency, 7. Cost                  | C. Client applications, Y. Telemedicine                                                   |
| Hello Nurse Darlene Irby, Darlene.Irby@jhpiego.org                                                                                                         |     | Yes |     |  |  | Yes |     |     | 3. Quality                                              | S. Learning and training system                                                           |
| Blood Safety Strengthening Programme: Blood Safety Information System (BSIS) Implementation Rhonwyn Cornell, rhonwyn.cornell@jembi.org                     |     | Yes | Yes |  |  |     |     | Yes | 1. Information, 3. Quality                              | H. Electronic medical record, X. Shared health record and health information repositories |

|                                                                                                                                                      |     |     |     |  |  |     |     |                                                                   |                                                                                                         |
|------------------------------------------------------------------------------------------------------------------------------------------------------|-----|-----|-----|--|--|-----|-----|-------------------------------------------------------------------|---------------------------------------------------------------------------------------------------------|
| The Safe Delivery App in Ghana Lauren Bellhouse, lauren@maternity.dk                                                                                 |     | Yes |     |  |  | Yes |     | 2. Availability, 3. Quality                                       | Q. Knowledge Management System, S. Learning and training system                                         |
| MNCH mobile content with nutrition focus, available in Twi, Ewe, Hausa and English in SMS and voice transcript format Kim Viljoen, kviljoen@gsma.com |     | Yes |     |  |  | Yes |     | 1. Information                                                    | C. Client application, D. Client communications system                                                  |
| LBG Covid-19 Response Tang Simon, simon@literacybridge.org                                                                                           |     | Yes |     |  |  | Yes |     | 1. Information                                                    | C. Client application, D. Client communications system, Q. Knowledge management system                  |
| MEDTRACK Omar Seidu Farouk, omar@medtrack.com.gh                                                                                                     |     | Yes |     |  |  | Yes |     | 1. Information, 6. Efficiency                                     | H. Electronic health record, X. Shared health record and health information repositories                |
| Carely Digital Health Platform Kelvin Ashie, healthdirectglobal@gmail.com                                                                            |     | Yes |     |  |  | Yes |     | 1. Information, 2. Availability, 6. Efficiency, 7. Cost           | C. Client applications, H. Electronic health record, M. health finance and insurance information system |
| Suivi de la vaccination de routine des enfants de moins 5 ans Dr Souma, souma58@gmail.com                                                            |     | Yes |     |  |  |     | Yes | 1. Information                                                    | D. Client communications system,                                                                        |
| OpenLMIS Guinea Rebecca Alban, info@openlmis.org                                                                                                     |     |     | Yes |  |  | Yes |     | 1. Information, 2. Availability, 6. Efficiency                    | T. Logistics management information system                                                              |
| cStock/DHIS2 Zoya Mohammed, zoya_mohamed@insupplyhealth.com                                                                                          |     |     | Yes |  |  | Yes |     | 1. Information, 2. Availability, 6. Efficiency, 8. Accountability | F. Community-based Information System, T. Logistics management information system                       |
| personal women's health advice via mobile chat MacGregor, Mac@lily.health                                                                            | Yes |     |     |  |  |     | Yes | 1. Information, 2. Availability, 4. Acceptability, 5. Utilization | C. Client application                                                                                   |

|                                                                                                                                                           |     |     |     |  |  |     |     |                                                                |                                                                                                    |
|-----------------------------------------------------------------------------------------------------------------------------------------------------------|-----|-----|-----|--|--|-----|-----|----------------------------------------------------------------|----------------------------------------------------------------------------------------------------|
| Scaling of BLIS(Basic Laboratory Information System) 3.0 Implementation Across Africa Emmanuel Kweyu, ekweyu@strathmore.edu                               | Yes |     |     |  |  | Yes |     | 1. Information                                                 | R. Laboratory and diagnostic information system                                                    |
| Medic App in Siaya County in partnership with Ministry of Health Michael Korir, korir@medicmobile.org                                                     | Yes |     |     |  |  | Yes |     | 1. Information, 2. Availability                                | F. Community-based Information System, Q. Knowledge Management                                     |
| Regional Action Through Data (RAD) Laurie Markle, LMarkle@brhc.com                                                                                        | Yes |     |     |  |  | Yes |     | 1. Information, 5. Utilization                                 | H. Electronic health record, X. Shared health record and health information repositories           |
| Malaria Test Tim Nichols, tim.nichols@vitalwave.com                                                                                                       | Yes |     |     |  |  | Yes |     | 2. Availability, 6. Efficiency                                 | C. Client application                                                                              |
| SmartHealth App in Kenya Nii Amon Dsane, ndsane@livinggoods.org                                                                                           |     | Yes | Yes |  |  |     | Yes | 1. Information, 2. Availability, 5. Utilization, 6. Efficiency | F. Community-based Information System,H. Electronic medical record, Q. Knowledge management system |
| MNCH mobile content with nutrition focus, available in Swahili and English in SMS and voice transcript format Kim Viljoen, kviljoen@gsma.com              | Yes |     |     |  |  | Yes |     | 1. Information                                                 | C. Client application, D. Client communications system, Q. Knowledge management system             |
| Keheala - Digital adherence technology that uses behavioral 'nudges' and basic feature phones to improve health outcomes. Jon Rathouser, jonr@keheala.com | Yes |     |     |  |  | Yes |     | 1. Information                                                 | C. Client applications,D. Client communications system,Q. Knowledge Management system              |



|                                                                                                                                                                     |     |     |  |  |  |     |  |     |                                                         |                                                                                 |
|---------------------------------------------------------------------------------------------------------------------------------------------------------------------|-----|-----|--|--|--|-----|--|-----|---------------------------------------------------------|---------------------------------------------------------------------------------|
| Medic App in Elgeyo Marakwet Susan Maigua, susan@medicmobile.org                                                                                                    |     | Yes |  |  |  | Yes |  |     | 5. Utilization,                                         | Q. Knowledge management system                                                  |
| Digital African Health Library Dr Bruce Dahlman, director@digitalhealthlibrary.net                                                                                  |     | Yes |  |  |  |     |  | Yes | 3. Quality                                              | Q. Knowledge management system                                                  |
| Improving Healthcare Capacity and Access Using THINKMD's Clinical Decision Support Tool Used by Private Healthcare Providers Meg McLauhlin, mmclaughlin@thinkmd.org |     | Yes |  |  |  | Yes |  |     | 1. Information, 3. Quality                              | Q. Knowledge Management system, U. Pharmacy information system                  |
| Safe Abortion App Sarah Shannon, Executive Director, SJHOLCOMBE@gmail.COM                                                                                           | Yes |     |  |  |  |     |  | Yes | 1. Information, 5. Utilization, 8. Accountability       | C. Client application, Q. Knowledge management system                           |
| Empower Health Molly Guy, molly.guy@medtronic.com                                                                                                                   | Yes | Yes |  |  |  |     |  |     | 2. Availability, 5. Utilization, 6. Efficiency, 7. Cost | C. Client applications, D. Client communications system, Y. Telemedicine        |
| M-Sawazisha: Integrating Mobile Technology in MNCH in Afya Jijini Michael Korir, korir@medicmobile.org                                                              |     | Yes |  |  |  | Yes |  |     | 1. Information, 2. Availability, 5. Utilization,        | B. Civil Registration and Vital Statistics. Community-based Information System, |
| PROMPTS - Promoting Mothers during Pregnancy through SMS Rachel M. Jones, Rjones@jacarandahealth.org                                                                | Yes |     |  |  |  | Yes |  |     | 5. Utilization,                                         | D. Client communication system                                                  |

|                                                                                                    |     |     |     |  |  |     |     |                                                                    |                                                                                                      |
|----------------------------------------------------------------------------------------------------|-----|-----|-----|--|--|-----|-----|--------------------------------------------------------------------|------------------------------------------------------------------------------------------------------|
| Medkit.Network Dr. Louis Somoni Machogu, dr.somoni@gmail.com                                       | Yes |     |     |  |  |     | Yes | 1. Information, 3. Quality                                         | C. Client applications, P. Identification registries and directories, U. Pharmacy information system |
| SASAdoctor Telemedicine Android App Francis Osiemo, francis.osiemo@sasadoctor.com                  | Yes | Yes |     |  |  | Yes |     | 2. Availability, 3. Quality, 6. Efficiency, 7. Cost                | Y. Telemedicine                                                                                      |
| Kenya Quality Model For Health e-tool Steven Wanyee, swanyee@intellisoftkenya.com                  |     |     | Yes |  |  |     | Yes | 3. Quality                                                         | K. Facility management information system                                                            |
| Bethany Kids Kijabe Hospital Steven Wanyee, swanyee@intellisoftkenya.com                           |     | Yes | Yes |  |  |     | Yes | 1. Information , 6. Efficiency                                     | H. Electronic medical record                                                                         |
| Kenya Health & Empowerment Wade Munday, wmunday@addisclinic.org                                    |     | Yes |     |  |  |     | Yes | 2. Availability, 3. Quality , 6. Efficiency, 7. Cost               | Y. Telemedicine                                                                                      |
| e-Hospital Steven Wanyee, swanyee@intellisoftkenya.com                                             |     |     | Yes |  |  |     | Yes | 1.Information, 6. Efficiency, 8. Accountability                    | K. Facility management information system                                                            |
| Mobile Solutions for Women and Children's Health (Mobile WACH) Keshet Ronen, keshet@uw.edu         | Yes | Yes |     |  |  |     | Yes | 1. Information, 2. Availability, 5. Utilization, 8. Accountability | C. Client applications, D. Client communications system                                              |
| DawaSure francis munyeki, munyekif@cadcreations.co.ke                                              | Yes |     |     |  |  |     | Yes | 2. Availability, 5.Utilization                                     | C. Client applications, U. Pharmacy information system                                               |
| Living Goods- Community Health Innovation Network (CHIN) Fransicah Nzanga, fnzanga@livinggoods.org | Yes | Yes |     |  |  |     | Yes | 1. Information, 6. Efficiency                                      | F. Community-based information system,                                                               |

|                                                                                                                                                          |     |     |     |  |  |     |     |                                                 |                                                                                    |
|----------------------------------------------------------------------------------------------------------------------------------------------------------|-----|-----|-----|--|--|-----|-----|-------------------------------------------------|------------------------------------------------------------------------------------|
| Lwala Community Alliance x OpenFn: Building a real-time decision support tool to strengthen healthcare in western Kenya Aleksa Krolls, aleksa@openfn.org | Yes | Yes |     |  |  | Yes |     | 3. Quality                                      | Q. Knowledge management system                                                     |
| COVID-19 Service Delivery Tracker Liz McNeil, lmcneil@jacarandahealth.org                                                                                |     |     | Yes |  |  | Yes |     | 1. Information                                  | W. Research Information System                                                     |
| KenyaEMR Pascal Mwele, Pascal.Mwele@thepalladiumgroup.com                                                                                                |     |     | Yes |  |  | Yes |     | 1. Information, 6.Efficiency                    | H. Electronic medical record                                                       |
| Afya Mobile Pascal Mwele, pascal.mwele@thepalladiumgroup.com                                                                                             |     | Yes |     |  |  | Yes |     | 1. Information                                  | F. Community-based information system                                              |
| ENDCORONAVIRUS.CO.KE Katherine Piets, kat@every1mobile.com                                                                                               | Yes |     |     |  |  | Yes |     | 1. Information                                  | C. Client application                                                              |
| Case Management Mobile App for Children with Disabilities Jessica Charles, jessica@kupenda.org                                                           |     | Yes |     |  |  | Yes |     | 1. Information, 2. Availability, 5. Utilization | F. Community-based Information System,                                             |
| Ohospital Daniel Kimani, suhadetechkenya@gmail.com                                                                                                       | Yes | Yes |     |  |  | Yes |     | 2. Availability, 7. Cost                        | Y. Telemedicine                                                                    |
| PaperEMR Pratap Kumar, pratap@health-e-net.org                                                                                                           | Yes |     |     |  |  | Yes | Yes | 1. Information ,6. Efficiency                   | H. Electronic medical record                                                       |
| Lesotho eRegister Monaheng Maoeng, monaheng.maoeng@gov.ls                                                                                                | Yes |     |     |  |  |     | Yes | 1. Information, 6. Efficiency                   | H. Electronic medical record, X. Shared Record and health information repositories |

|                                                                                                                                        |     |     |     |  |  |  |     |     |                                                                   |                                                                                                                  |
|----------------------------------------------------------------------------------------------------------------------------------------|-----|-----|-----|--|--|--|-----|-----|-------------------------------------------------------------------|------------------------------------------------------------------------------------------------------------------|
| Blood Safety Strengthening Programme: Blood Safety Information System (BSIS) Implementation Rhonwyn Cornell, rhonwyn.cornell@jembi.org | Yes |     |     |  |  |  |     |     | 1. Information, 6. Efficiency                                     | H. Electronic Medical Record, X. Shared Health Record and health information repositories                        |
| Lab Information System Malebanye Lerotholi, 4malbe@gmail.com                                                                           | Yes |     |     |  |  |  | Yes |     | 1. Information                                                    | R. Laboratory and diagnostics information system                                                                 |
| SMS Notification System Tsele Moloeli, moloet@yahoo.com                                                                                | Yes |     |     |  |  |  |     | Yes | 1. Information, 5. Utilization                                    | D. Client communications system                                                                                  |
| Electronic Logistics Management and Inventory Management System Monaheng Maoeng, monaheng.maoeng@gov.ls                                | Yes |     |     |  |  |  | Yes |     | 1. Information 2. Availability , 6. Efficiency, 8. Accountability | T. Logistics and diagnostics information system                                                                  |
| CITIZEN APP Pule Phafane, pule@smartmycompany.com                                                                                      |     |     | Yes |  |  |  |     | Yes | 1. Information,                                                   | I. Emergency response system , V. Public health and disease surveillance system , W. Research information system |
| Client Tracking Application Sele Mthimkhulu, smthimkhulu@pedaids.org                                                                   | Yes |     |     |  |  |  | Yes |     | 5. Utilization,                                                   | D. Client communications system                                                                                  |
| mHero Liberia IntraHealth International, mHero@intrahealth.org                                                                         |     | Yes | Yes |  |  |  | Yes |     | 1. Information,                                                   | I. Emergency response system , V. Public health and disease surveillance system                                  |
| mTOMADY Jennifer Bencivenga, jb@mtomady.com                                                                                            | Yes | Yes |     |  |  |  | Yes |     | 7. Cost                                                           | M. Health finance an insurance information system                                                                |
| USAID ACCESS m-health initiative Stephanie Ranaivo, sranaivo@usaidaccess.org                                                           |     | Yes |     |  |  |  | Yes |     | 1. Information, 3. Quality                                        | F. Community-based Information System, N. Health management information system                                   |

|                                                                                                                           |  |     |     |  |  |     |     |  |                                                                    |                                                                                 |
|---------------------------------------------------------------------------------------------------------------------------|--|-----|-----|--|--|-----|-----|--|--------------------------------------------------------------------|---------------------------------------------------------------------------------|
| The Malawi Digital Village Clinic (DVC) Christopher Kulanga, chriskulanga@gmail.com                                       |  | Yes |     |  |  | Yes |     |  | 1. Information, 2. Availability, 3. Quality,                       | F. Community-based Information system, Q. Knowledge Management system           |
| cStock - EPI Erick Mwale, Erick.Mwale@savethechildren.org                                                                 |  | Yes |     |  |  | Yes |     |  | 1. Information, 2. Availability, 6. Efficiency , 8. Accountability | T. Logistics management information system                                      |
| Medic at St Gabriel's Hospital Alex Ngalande, unknown@yahoo.com                                                           |  | Yes |     |  |  | Yes |     |  | 1, Information                                                     | B. Civil Registration and Vital Statistics                                      |
| ONSE - Mobile Village Toolkit Rudi Thetard - ONSE Chief of Party, rthetard@msh.org                                        |  |     | Yes |  |  | Yes |     |  | 1. Information, 2. Availability, 3. Quality                        | F. Community-based Information System, Q. Knowledge management system           |
| ONSE - Integrated Supportive Supervision Toolkit Rudi Thetard - ONSE Chief of Party, rthetard@msh.org                     |  |     | Yes |  |  | Yes |     |  | 1.Information, 3.Quality                                           | N. Health management information system                                         |
| Supporting LIFE Joseph WU, wcsg@lukeinternational.no                                                                      |  |     | Yes |  |  | Yes |     |  | 1. Information,                                                    | W. Research Information System                                                  |
| Malawi electronic integrated disease surveillance and response system (Malawi eIDSR) Joseph Wu, wcsg@lukeinternational.no |  | Yes | Yes |  |  |     | Yes |  | 1. Information, 6. Efficiency                                      | H. Electronic medical records, V. Public health and disease surveillance system |
| One Community Steve Choko, stevec@jhuccpmw.org                                                                            |  | Yes |     |  |  | Yes |     |  | 1. Information                                                     | F. Community based information system                                           |
| Malawi EID ART Initiation Tracking Sean Blaschke, sblaschke@unicef.org                                                    |  | Yes |     |  |  |     | Yes |  | 1. Information,                                                    | R. Laboratory and diagnostic information system                                 |

|                                                                                                                                                        |     |     |     |  |  |     |     |                                                                   |                                                                                         |
|--------------------------------------------------------------------------------------------------------------------------------------------------------|-----|-----|-----|--|--|-----|-----|-------------------------------------------------------------------|-----------------------------------------------------------------------------------------|
| Chipatala Cha Pa Foni (CCPF) Health Center by Phone Malawi Carla Blauvelt, carla.blauvelt@villagereach.org                                             | Yes |     |     |  |  | Yes |     | 2. Availability, 6. Efficiency                                    | C. Client application                                                                   |
| Barr Foundation iCCM mHealth project Erica Layer, elayer@d-tree.org                                                                                    |     |     | Yes |  |  | Yes |     | 1. Information                                                    | F. Community based health information system, Q. Knowledge management system            |
| CMAM Stock Monitoring System Malawi Sylvester Kathuma, kathumbasylvester@gmail.com                                                                     |     |     | Yes |  |  |     | Yes | 1. Information                                                    | T. Logistics management information system                                              |
| Medic Mobile DIY Malawi Jacqueline Edwards, jacqueline@medicmobile.org                                                                                 |     | Yes |     |  |  |     | Yes | 1. Information, 6. Efficiency                                     | H. Electronic medical record                                                            |
| MNCH mobile content with nutrition focus, available in Chichewa, Tumbuka and English in SMS and voice transcript format Kim Viljoen, kviljoen@gsma.com | Yes |     |     |  |  | Yes |     | 1. Information                                                    | C. Client applications, D. Client communications system, Q. Knowledge management system |
| OpenLMIS Malawi Rebecca Alban, info@openlmis.org                                                                                                       |     | Yes | Yes |  |  | Yes |     | 1. Information, 2. Availability, 6. Efficiency, 8. Accountability | T. Logistics management information system                                              |
| Fetal Monitoring device and mobile decision support Chris Kulanga, Ckulanga@D-tree.org                                                                 |     | Yes |     |  |  |     | Yes | 5. Utilization                                                    | Q. Knowledge management system                                                          |
| Electronic Participant Locator (ePAL) Luke Banda, lsbanda@mlw.mw                                                                                       |     |     | Yes |  |  | Yes |     | 1. Information                                                    | I. Emergency response system, V. Public health and disease surveillance system          |

|                                                                                                                                      |     |     |     |  |     |     |     |                                                                    |                                                                                                     |
|--------------------------------------------------------------------------------------------------------------------------------------|-----|-----|-----|--|-----|-----|-----|--------------------------------------------------------------------|-----------------------------------------------------------------------------------------------------|
| Advanced mobile toolkit alongside Muso's ProCCM model in Mali Fatou Fall, fatou@medicmobile.org                                      |     | Yes | Yes |  |     |     | Yes | 3. Quality, 6. Efficiency                                          | F. Community based information system                                                               |
| BIOWINPHARMA Mamadou Dakouo, contact@biowinpharma.com                                                                                |     | Yes |     |  |     | Yes |     | 1. Information, 6. Efficiency                                      | H. Electronic Medical Record, X. Shared health record and health information repositories           |
| Access to Infant and Maternal (AIM) Health Plus Mauritania Zeine Abidine Ba, zeine_abidine@wvi.org                                   |     | Yes |     |  | Yes |     |     | 1. Information 2. Availability, 3. Quality, 5. Utilization         | F. Community - based information system, Q. Knowledge Management system                             |
| upSCALE Joaquim Rebelo, j.rebelo@malariaconsortium.org                                                                               |     | Yes |     |  |     | Yes |     | 1. Information, 2. Availability, 3. Quality, 5. Utilization        | F. Community -based information system, Q. Knowledge management system                              |
| MNCH mobile content with nutrition focus, available in 4 languages in SMS and voice transcript format Kim Viljoen, kviljoen@gsma.com | Yes |     |     |  | Yes |     |     | 1. Information                                                     | C. Client application, D. Client communications system                                              |
| OpenLMIS Mozambique (SELV) Rebecca Alban, Info@openlmis.org                                                                          |     | Yes | Yes |  |     | Yes |     | 1. Information, 2. Availability, 6. Efficiency , 8. Accountability | T. Logistics management information system                                                          |
| OpenLMIS Mozambique (SIGLUS) Rebecca Alban, Info@openlmis.org                                                                        |     | Yes | Yes |  |     | Yes |     | 1. Information, 2. Availability, 6. Efficiency,8. Accountability   | T. Logistics management information system                                                          |
| PENSA Valter Cumbi, vcumbi@sourcecode.solutions                                                                                      | Yes |     |     |  |     | Yes |     | 1. Information,2. Availability, 5. Utilization                     | C. Client applications, Q. Knowledge management system                                              |
| Namibia Master Facility List Maria Helao, Maria.Helao@mhss.gov.na                                                                    |     |     | Yes |  |     | Yes |     | 1. Information, 5. Utilization                                     | L. Geographic information system (GIS), X. Shared health record and health information repositories |

|                                                                                                                                            |     |     |     |  |  |     |     |                                 |                                                                       |
|--------------------------------------------------------------------------------------------------------------------------------------------|-----|-----|-----|--|--|-----|-----|---------------------------------|-----------------------------------------------------------------------|
| Namibia Planned Parenthood Association (NAPPA) Erin Sullivan,<br>erin.sullivan@jhpiego.org                                                 |     | Yes |     |  |  |     | Yes | 1. Information, 6. Efficiency   | H. Electronic medical record                                          |
| Act to Save (A2S) Ezechiel Mahamane,<br>ezechiel_mahamane@wvi.org                                                                          |     | Yes |     |  |  | Yes |     | 1. Information, 2. Availability | F. Community-based information system, Q. Knowledge management system |
| HelloMAMA Steve Ollis,<br>steve.ollis@mcsprogram.org                                                                                       |     | Yes |     |  |  | Yes |     | 1. Information, 5. Utilization  | D. Client communications system,                                      |
| USAID funded - CaTSS OpenMRS Electronic Medical Record System for 19 ART Clinics Benjamin Akinmoyeje,<br>bakinmoyeje@msh.org               |     | Yes | Yes |  |  |     | Yes | 1. Information, 6. Efficiency   | H. Electronic medical record                                          |
| WeMUNIZE Steve Ollis,<br>steve.ollis@mcsprogram.org                                                                                        |     | Yes |     |  |  |     |     | 1. Information, 5. Utilization  | D. Client communications system                                       |
| MNCH mobile content with nutrition focus, available in 5 local languages in SMS and voice transcript format Kim Viljoen, kviljoen@gsma.com | Yes | Yes |     |  |  | Yes |     | 1. Information                  | C. Client application, D. Client communications system                |
| NaijaCare Dr Saidat Akanbi,<br>saidat@every1mobile.com                                                                                     |     |     | Yes |  |  | Yes |     | 2. Availability, 5. Utilization | P. Identification registries and directories                          |
| NaijaCare Project Moshood Abdullateef,<br>moshood@every1mobile.com                                                                         |     | Yes |     |  |  | Yes |     | 2. Availability, 3. Quality     | S. Learning and training system                                       |
| Complete Health Nneka Mobisson,<br>nneka.mobisson@mymdoc.com                                                                               | Yes |     |     |  |  |     | Yes | 1. Information                  | C. Client applications                                                |
| Wellvis Wale Adeosun,<br>wale@wellvis.org                                                                                                  | Yes | Yes |     |  |  |     |     | 2. Availability, 3. Quality, 5. | Y. Telemedicine                                                       |



|                                                                                                                                                   |     |     |     |  |  |     |     |  |                                                  |                                                                        |
|---------------------------------------------------------------------------------------------------------------------------------------------------|-----|-----|-----|--|--|-----|-----|--|--------------------------------------------------|------------------------------------------------------------------------|
|                                                                                                                                                   |     |     |     |  |  |     |     |  | Utilization, 7.<br>Cost                          |                                                                        |
| SwissTPH x OpenFn: Automated, real-time data integration & disease monitoring Aleksa Krolls, aleksa@openfn.org                                    |     | Yes | Yes |  |  |     | Yes |  | 1. Information, 6.<br>Efficiency                 | H. Electronic medical record, N. Health management information system, |
| Audio Job Aids for Family Planning Providers Emily Mangone, emily_mangone@abtassoc.com                                                            |     | Yes |     |  |  |     | Yes |  | 2. Availability, 3.<br>Quality                   | Q. Knowledge management system                                         |
| HelpMum Dr Abiodun Adereni, abbey2real@gmail.com                                                                                                  |     | Yes |     |  |  |     | Yes |  | 1. Information, 2.<br>Availability,3.<br>Quality | Q. Knowledge management system S. Learning and training system         |
| Real-Time Monitoring of Moderna Vaccines in collaboration with National Primary Health Care Development Agency. Oghenetega Iortim, tega@gricd.com |     | Yes | Yes |  |  |     | Yes |  | 1. Information, 3.<br>Quality                    | T. Logistics management information system                             |
| ulerawa luke shors, lshors@icloud.com                                                                                                             |     |     | Yes |  |  | Yes |     |  | 7. Cost                                          | M. Health finance and insurance information system                     |
| Quick Health Chris Agape Ajah, hello@getquickhealth.com                                                                                           | Yes |     |     |  |  | Yes |     |  | 1. Information, 2.<br>Availability               | P. Identification registries and directories                           |
| PHARMARUN IBITAYO TAIWO, tayotaiwo83@yahoo.com                                                                                                    | Yes |     |     |  |  |     | Yes |  | 2. Availability                                  | C. Client applications                                                 |
| EmHealth-Paediatric Digital Health Initiative Dr Agbarakwe Chukwuemeka, brammy@emhealthglobal.org                                                 |     | Yes |     |  |  |     | Yes |  | 1. Information, 6.<br>Efficiency                 | H. Electronic medical record                                           |

|                                                                                                                                                            |     |     |     |  |  |     |     |                                                                   |                                                                                          |
|------------------------------------------------------------------------------------------------------------------------------------------------------------|-----|-----|-----|--|--|-----|-----|-------------------------------------------------------------------|------------------------------------------------------------------------------------------|
| OneCare Hafeez Ayanda,<br>hayanda@innovastra.com                                                                                                           | Yes | Yes |     |  |  |     | Yes | 1. Information, 6. Efficiency, 7. Cost                            | H. Electronic medical record, K. Facility management information system, Y. Telemedicine |
| E-Heza Data Solutions<br>Wendy Leonard, MD,<br>AAHIVS,<br>wendy@theihanganeproject.com                                                                     |     | Yes |     |  |  |     | Yes | 1. Information, 3. Quality                                        | Q. Knowledge management system                                                           |
| Rwandan digital ANC module<br>Mr Felix Sayinzoga,<br>felix.sayinzoga@rbc.gov.rw                                                                            |     | Yes | Yes |  |  | Yes |     | 1. Information, 3. Quality                                        | Q. Knowledge management system                                                           |
| JoCare Jerome<br>Nshimiyimana,<br>njerome05@gmail.com                                                                                                      | Yes |     |     |  |  | Yes |     | 1. Information                                                    | C. Client application                                                                    |
| Automation and AI for Health Campaign Planning<br>Sangeeta Jobanputra,<br>sraja@connecti3.com                                                              |     |     | Yes |  |  | Yes |     | 1. Information, 6. Efficiency                                     | T. Logistics management information system                                               |
| Suivi nutritionnel des enfants de moins de 5 ans dans la région de Lobata Eduardo,<br>ferreirae@who.int                                                    | Yes | Yes |     |  |  |     | Yes | 2. Availability, 5. Utilization, 7. Cost                          | Y. Telemedicine                                                                          |
| Implementation of a Performance-Based Financing Data System for Senegal - using the open source tool Hesabu<br>Dr Malick Cissé Ndiaye,<br>illeyya@yahoo.fr |     |     | Yes |  |  |     | Yes | 1. Information, 3. Quality                                        | K. Facility management information system                                                |
| Suivi des grossesses dans la région de Kaolack<br>Dr Dia,<br>nourougaloya@gmail.com                                                                        | Yes | Yes |     |  |  |     | Yes | 2. Availability, 5. Utilization, 7. Cost                          | Y. Telemedicine                                                                          |
| Informed Push Model - Yeksi-Naa<br>Melanie Joiner,<br>mjoiner@intrahealth.org                                                                              |     |     | Yes |  |  |     | Yes | 1. Information, 2. Availability, 6. Efficiency, 8. Accountability | T. Logistics management information system                                               |

|                                                                                                                                        |  |     |     |  |  |     |     |  |                                                                   |                                                                       |
|----------------------------------------------------------------------------------------------------------------------------------------|--|-----|-----|--|--|-----|-----|--|-------------------------------------------------------------------|-----------------------------------------------------------------------|
| Senegal immunization supply chain Neeraj Thakare, neeraj@logistimo.com                                                                 |  |     | Yes |  |  | Yes |     |  | 1. Information, 2. Availability, 6. Efficiency, 8. Accountability | T. Logistics management information system                            |
| Aarleen mHealth System Gorgui Diallo, gdiallo@aficare.org                                                                              |  | Yes |     |  |  | Yes |     |  | 1. Information, 8. Accountability                                 | Q. Knowledge management system                                        |
| VaxTrac Dayo Spencer-Walters, dayo.spencer-walters@sl.ehealthafrica.org                                                                |  | Yes |     |  |  |     | Yes |  | 1. Information, 6. Efficiency                                     | H. Electronic medical records                                         |
| Electronic Vaccination Record and Tracking System Implementation Project (VaxTrac) Musa Bernard Komeh, musa.komeh@sl.ehealthafrica.org |  | Yes |     |  |  |     | Yes |  | 1. Information, 6. Efficiency                                     | H. Electronic medical records, Q. Knowledge management system         |
| Saving Lives Mohammad B. Jalloh, mbjalloh@focus1000.org                                                                                |  | Yes |     |  |  |     |     |  | 1. Information, 5. Utilization, 6. Efficiency                     | H. Electronic medical records                                         |
| RapidPro Kazutaka Sekine, ksekine@unicef.org                                                                                           |  | Yes | Yes |  |  |     | Yes |  | 1. Information,                                                   | N. Health management information system                               |
| Mobile Training and Support (MOTS) Frederick F. Kamara (World Vision-SL), Fredrick_kamara@wvi.org                                      |  | Yes |     |  |  |     | Yes |  | 2. Availability, 3. Quality,                                      | S. Learning and training system                                       |
| The Safe Delivery App in Sierra Leone Lauren Bellhouse, lauren@maternity.dk                                                            |  | Yes |     |  |  |     | Yes |  | 2. Availability, 3. Quality                                       | S. Learning and training system                                       |
| Access to Infant and Maternal (AIM) Health Plus Sierra Leone Joseph Musa, joseph_musa@wvi.org                                          |  | Yes |     |  |  | Yes |     |  | 1. Information, 2. Availability,                                  | F. Community-based information System, Q. Knowledge management system |

|                                                                                                          |     |     |     |  |  |  |     |                                                                |                                                                                           |
|----------------------------------------------------------------------------------------------------------|-----|-----|-----|--|--|--|-----|----------------------------------------------------------------|-------------------------------------------------------------------------------------------|
| MOTS COVID-19 Monica Amponsah, mamponsah@grameenfoundation.org                                           |     | Yes |     |  |  |  | Yes | 2. Availability, 3. Quality                                    | S. Learning and training system                                                           |
| Public Health Incentives Gugulethu Nyathi, gugu@ribbonblockchain.com                                     | Yes |     |     |  |  |  | Yes | 2. Availability                                                | C. Client application                                                                     |
| NACOSA Health Analytics Platform (NHAP) Safa Naraghi, safa@zenysis.com                                   |     |     | Yes |  |  |  | Yes | 1. Information,                                                | N. Health management information system                                                   |
| BroadReach COVID-19 Pandemic Management Fiona de Korte, fdekorte@brhc.com                                |     | Yes | Yes |  |  |  | Yes | 1. Information, 2. Availability, 5. Utilization, 6. Efficiency | N. Health management information system, V. Public health and disease surveillance system |
| Vula Mobile William Mapham, william@vulamobile.com                                                       |     | Yes |     |  |  |  | Yes | 2. Availability, 3. Quality, 5. Utilization, 7. Cost           | Y. Telemedicine                                                                           |
| eLQAS: Collecting real-time polio vaccination data Yaw Anokwa, yanokwa@nafundi.com                       |     | Yes |     |  |  |  |     | 1. Information                                                 | N. Health management information system                                                   |
| e-Hospital - South Sudan Steven Wanyee, swanyee@intellisoftkenya.com                                     |     | Yes |     |  |  |  | Yes | 1. Information, 6. Efficiency,                                 | K. Facility management information system                                                 |
| Integrated Humanitarian Data Package for public health data needs Jonathan Hanson, jhanson@mapaction.org |     |     | Yes |  |  |  | Yes | 1. Information                                                 | T. Logistics management information system                                                |

|                                                                                                                                                           |  |     |     |  |  |     |     |     |                                                                   |                                                                                |
|-----------------------------------------------------------------------------------------------------------------------------------------------------------|--|-----|-----|--|--|-----|-----|-----|-------------------------------------------------------------------|--------------------------------------------------------------------------------|
| Improving Healthcare Capacity and Access Using THINKMD's Clinical Decision Support Tool in a Humanitarian Setting Meg McLaughlin, mmclaughlin@thinkmd.org |  | Yes |     |  |  | Yes |     |     | 1. Information, 6. Efficiency                                     | H. Electronic medical record                                                   |
| eLMIS Facility Edition (FE) Ashraf Islam, ashraf_islam@jsi.com                                                                                            |  |     | Yes |  |  |     |     | Yes | 1. Information, 2. Availability, 6. Efficiency, 8. Accountability | T. Logistics management information system                                     |
| The Safe Delivery App in Togo (part of DI 2018 Project) Lauren Bellhouse, lauren@maternity.dk                                                             |  | Yes |     |  |  |     | Yes |     | 2. Availability, 3. Quality                                       | Q. Knowledge management system                                                 |
| Digital Tools for CHWs with Integrate Health and Medic Mobile Fatou Fall, fatou@medicmobile.org                                                           |  | Yes |     |  |  | Yes |     |     | 1. Information, 2. Availability, 3. Quality                       | Q. Knowledge management system                                                 |
| Télédermatologie TOGO Palokinam PITCHE, vincent.pitche@gmail.com                                                                                          |  | Yes |     |  |  | Yes |     |     | 2. Availability, 3. Quality, 7. Cost                              | Y. Telemedicine                                                                |
| UgandaEMR (OpenMRS) Jonathan Mpango, jmpango@musph.ac.ug                                                                                                  |  | Yes |     |  |  |     | Yes |     | 1. Information, 6. Efficiency                                     | H. Electronic medical record                                                   |
| : Improving outcomes in HIV patients using mobile phone based interactive software support Rosalind Parkes Ratanshi, rp549@medschl.cam.ac.uk              |  | Yes |     |  |  |     |     | Yes | 1. Information, 5. Utilization                                    | D. Client communications system,                                               |
| ART ACCESS Dr Rosalind Parkes-Ratanshi, rp549@medschl.cam.ac.uk                                                                                           |  | Yes |     |  |  | Yes |     |     | 1. Information, 5. Utilization, 6. Efficiency                     | H. Electronic medical record, R. Laboratory and diagnostics information system |

|                                                                                                                                      |     |     |  |  |  |     |     |     |                                |                                                                                                                    |
|--------------------------------------------------------------------------------------------------------------------------------------|-----|-----|--|--|--|-----|-----|-----|--------------------------------|--------------------------------------------------------------------------------------------------------------------|
| Connect for Life - Infectious Disease Institute (IDI) Theresa Pattery, tpattery@its.jnj.com                                          | Yes |     |  |  |  | Yes |     |     | 1. Information                 | C. Client applications                                                                                             |
| STRE@MLINE Mr Samuel Mugisha, CEO Innovation Streams Ltd, samuel@innovationstreams.tech                                              |     | Yes |  |  |  | Yes |     |     | 1. Information, 6. Efficiency, | K. Facility management information system                                                                          |
| REFERENCE LABORATORY INFORMATION SYSTEMS (EID/VL LIMS) PROSCOVIA NAMBUYA MBABAZI, pronam2000@gmail.com                               |     | Yes |  |  |  |     | Yes |     | 1. Information, 6. Efficiency  | R. Laboratory and diagnostics information systems                                                                  |
| Access to Infant and Maternal (AIM) Health Plus Uganda Racheal Auma, racheal_auma@wvi.org                                            |     | Yes |  |  |  |     | Yes |     | 2. Availability, 3. Quality,   | Q. Knowledge management system                                                                                     |
| SmartHealth App in Uganda Nii Amon Dsane, ndsane@livinggoods.org                                                                     |     | Yes |  |  |  |     |     | Yes | 2. Availability, 3. Quality    | F. Community -based information system, Q. Knowledge management system, T. Logistics management information system |
| MNCH mobile content with nutrition focus, available in 5 languages in SMS and voice transcript format Kim Viljoen, kviljoen@gsma.com | Yes | Yes |  |  |  | Yes |     |     | 1. Information                 | C. Client applications, D. Client communications system                                                            |

|                                                                                                                                                                              |     |     |     |     |  |     |     |  |                                                |                                                                        |
|------------------------------------------------------------------------------------------------------------------------------------------------------------------------------|-----|-----|-----|-----|--|-----|-----|--|------------------------------------------------|------------------------------------------------------------------------|
| NoviGuide: Tablet-based clinical decision support bringing neonatal expertise to the bedside while uncovering barriers to care Joshua Bress, josh.bress@globalstrategies.org |     | Yes |     |     |  | Yes |     |  | 3. Quality                                     | Q. Knowledge and management system                                     |
| The Zone Raquel Palomino Gonzalez, lund@unfpa.org                                                                                                                            | Yes |     |     |     |  | Yes |     |  | 1. Information                                 | C. Client applications , Q. Knowledge management system                |
| Bringing Back Mothers and Babies Kisaakye Linda, lkisaakye@gmail.com                                                                                                         |     | Yes |     |     |  |     | Yes |  | 1. Information, 5. Utilization, ,6. Efficiency | H. Electronic medical record                                           |
| DREAMS/OVC Juliet Cheptoris, julietcheptoris@gmail.com                                                                                                                       |     | Yes | Yes |     |  |     | Yes |  | 1. Information, 6. Efficiency                  | H. Electronic medical record, N. Health management information system, |
| Early Infant Diagnosis(EID) Dashboard Dr. Victor Bigira, vbigira@musph.ac.ug                                                                                                 |     | Yes | Yes |     |  |     | Yes |  | 1. Information, 6. Efficiency                  | H. Electronic medical record                                           |
| HiMap Mobile Application Jonathan Mpango, jmpango@musph.ac.ug                                                                                                                | Yes | Yes |     |     |  |     | Yes |  | 1. Information                                 | P. Identification registries and directories                           |
| RxSolution Stephanie Xueref, smxueref@msh.org                                                                                                                                |     | Yes | Yes |     |  | Yes |     |  | 1. Information, 2. Availability,               | T. Logistics management information system                             |
| Pharmaceutical Information Portal Stephanie Xueref, smxueref@msh.org                                                                                                         |     |     |     | Yes |  | Yes |     |  | 1. Information,                                | N. Health management information system                                |
| Option B+ Kisaakye Linda, lkisaakye@gmail.com                                                                                                                                |     | Yes |     |     |  |     | Yes |  | 1. Information, 5. Utilization                 | N. Health management information system                                |

|                                                                                                     |  |     |     |  |  |     |  |     |                                                                   |                                                                                                              |
|-----------------------------------------------------------------------------------------------------|--|-----|-----|--|--|-----|--|-----|-------------------------------------------------------------------|--------------------------------------------------------------------------------------------------------------|
| Smart Hospital Information System (SmarHIS) Dr Simon Ndira,<br>simon.ndira@compelling.wo<br>rks     |  | Yes |     |  |  | Yes |  |     | 1. Information, 6. Efficiency                                     | K. Facility management information system                                                                    |
| Performance Tracking App for CHW Supervisors Simon Mutama,<br>smutama@livinggoods.org               |  | Yes | Yes |  |  |     |  | Yes | 1. Information, 3. Quality,                                       | F. Community-based information system, O. Human resources information system, Q. Knowledge management system |
| mTrac Uganda Carol Kyoziira,<br>ckyoziira@gmail.com                                                 |  | Yes | Yes |  |  |     |  | Yes | 1. Information, 2. Availability, 6. Efficiency, 8. Accountability | T. Logistics management information system                                                                   |
| FamilyConnect Dr. Jesca Nsungwa Sabiiti,<br>jnsabiiti@gmail.com                                     |  | Yes |     |  |  |     |  | Yes | 1. Information                                                    | B. Civil Registration and Vital Statistics, F. Community-based information system,                           |
| Stre@mline Samuel Mugisha,<br>samuel@streamlinehealth.org                                           |  | Yes |     |  |  |     |  | Yes | 1. Information, 5. Utilization, 6. Efficiency                     | H. Electronic medical record, D. Client communications system                                                |
| Open Client Registry Wayan Vota, wvota@intrahealth.org                                              |  | Yes |     |  |  |     |  | Yes | 1. Information , 6. Efficiency                                    | H. Electronic medical record, X. Shared health record and health information repositories                    |
| USAID RHITES-N, Lango Med Makumbi,<br>med_makumbi@ug.jsi.com                                        |  | Yes |     |  |  |     |  | Yes | 1. Information, 5. Utilization                                    | D. Client communications system                                                                              |
| Pfizer Project Bugiri Elisha Nangosha,<br>elisha_nangosha@wvi.org                                   |  | Yes |     |  |  | Yes |  |     | 3. Quality,                                                       | Q. Knowledge and management system ,S. Learning and training system                                          |
| Buikwe Maternal Newborn and Child Health (B-MNCH) Project Angella Akolla,<br>angella_akolla@wvi.org |  | Yes |     |  |  | Yes |  |     | 1. Information, 8. Accountability                                 | Q. Knowledge management system                                                                               |



|                                                                                                                               |     |     |     |     |  |     |     |     |                                                   |                                                                                                    |
|-------------------------------------------------------------------------------------------------------------------------------|-----|-----|-----|-----|--|-----|-----|-----|---------------------------------------------------|----------------------------------------------------------------------------------------------------|
| Kampala Emergency Digital Emergency System Douglas Akii Bua, dbua@psiug.org                                                   |     | Yes |     |     |  | Yes |     |     | 1. Information, 5. Utilization                    | F. Community based information system                                                              |
| Electronic Inventory Management Services System (e-IMSS) Cliton Chikwata, clinton.chikwata@tmcg.co.ug                         |     | Yes |     |     |  |     | Yes |     | 1. Information, 2. Availability                   | T. Logistics management information system                                                         |
| Public Health Open Community Mapping Kiggudde Deogratius, deogratias@mapuganda.org                                            |     | Yes |     |     |  | Yes |     |     | 1. Information                                    | F. Community-based Information System, L. Geographic information system                            |
| OpenONCIMS Dr Wasswa William, williamwasswa036@gmail.com                                                                      |     | Yes |     |     |  |     |     |     | 1. information, 3. Quality, 6. Efficiency         | R. Laboratory and diagnostics information system                                                   |
| Vaccine Information Management System (VIMS) Ssanyu Nyinondi, snyinondi@tz.jsi.com                                            |     |     | Yes | Yes |  |     | Yes |     | 2. Availability                                   | T. Logistics management information system, G. Data interchange interoperability and accessibility |
| Safer Deliveries Rachel Hofmann, rhofmann@d-tree.org                                                                          |     | Yes |     |     |  |     | Yes |     | 1. Information, 2. Availability                   | Q. Knowledge management system                                                                     |
| Mobilizing Maternal Health (MMH) Gloria Kahamba, gkahamba@d-tree.org                                                          | Yes |     |     |     |  |     |     | Yes | 2. Availability, 5. Utilization, 6. Efficiency    | I. Emergency response system                                                                       |
| Community Family Planning and Model Household Systems; Population Health Environment (PHE) Rebecca Litner, rlitner@d-tree.org |     | Yes |     |     |  |     |     | Yes | 1. Information, 5. Utilization, 8. Accountability | F. Community based information system, Q. Knowledge management system                              |

|                                                                                                                                                                                  |     |     |  |  |     |  |     |                                                                |                                                                                             |
|----------------------------------------------------------------------------------------------------------------------------------------------------------------------------------|-----|-----|--|--|-----|--|-----|----------------------------------------------------------------|---------------------------------------------------------------------------------------------|
| Sauti- HIV Prevention Program Gloria Kahamba, gkahamba@d-tree.org                                                                                                                |     | Yes |  |  |     |  | Yes | 1. Information, 5. Utilization, 6. Efficiency                  | H. Electronic medical record                                                                |
| MCSP Facility and Community MCH application Steve Ollis, Steve.ollis@mcsprogram.org                                                                                              |     | Yes |  |  |     |  | Yes | , 2. Availability, 3. Quality                                  | Q. Knowledge management system                                                              |
| BID INITIATIVE Hassan Mtenga, Laurie Warner, hmtenga@path.org                                                                                                                    |     | Yes |  |  |     |  | Yes | 1. Information, 5. Utilization, 6. Efficiency                  | H. Electronic medical record                                                                |
| Non-discriminating access for Digital Inclusion (DigI) Christine Holst, christine.holst@medisin.uio.no                                                                           | Yes |     |  |  | Yes |  |     | 1. Information,                                                | C. Client application                                                                       |
| MNCH mobile content with nutrition focus, available in Kiswahili and English in SMS and voice transcript format Mojca Cargo, mcargo@gsma.com                                     | Yes | Yes |  |  | Yes |  |     | 1. Information                                                 | C. Client applications, D. Client communications system                                     |
| The Safe Delivery App-Tanzania Helena Lassen, helena@maternity.dk                                                                                                                |     | Yes |  |  | Yes |  |     | 2. Availability, 3. Quality                                    | Q. Knowledge management system                                                              |
| USAID BORESHA AFYA - COMMUNITY HEALTH INFORMATION SYSTEM ENCOMPASSING OPEN SMART REGISTER PLATFORM, CLOSED USER GROUP & ELEARNING Dunstan Bishanga, Dunstan.Bishanga@jhpiego.org |     | Yes |  |  | Yes |  |     | 1. Information, 2. Availability, 5. Utilization, 6. Efficiency | H. Electronic medical record, I. Emergency response system, S. Learning and training system |

|                                                                                                                                                                                                            |  |     |     |  |  |     |     |                                                                   |                                                                                                                                       |
|------------------------------------------------------------------------------------------------------------------------------------------------------------------------------------------------------------|--|-----|-----|--|--|-----|-----|-------------------------------------------------------------------|---------------------------------------------------------------------------------------------------------------------------------------|
| SAUTI PROJECT-KVP MOBILE DATA COLLECTION SYSTEM Dr Albert Komba, Albert.Komba@jhpiego.org                                                                                                                  |  | Yes |     |  |  |     | Yes | 1. Information,                                                   | F. Community-based health information system                                                                                          |
| Clinical Monitoring System for Preservice Trainees-More and Better Midwives for Rural Tanzania Project Dr Julius Masanika, Julius.Masanika@jhpiego.org                                                     |  | Yes |     |  |  |     | Yes | 1. Information, 3. Quality,                                       | O. Human resources information system                                                                                                 |
| Family Planning Digital Health System for Community Health Workers - Shinyanga Region Gloria Kahamba, gkahamba@dtree.org                                                                                   |  | Yes |     |  |  |     | Yes | 1. Information,                                                   | F. Community-based Information System,                                                                                                |
| Rheumatic Heart Disease and Hypertension Tracking Stefanie Kot, skot@dtree.org                                                                                                                             |  | Yes |     |  |  |     | Yes | 1. Information 2. Availability, 5. Utilization ,6. Efficiency     | H. Electronic medical record, O. Human resources information system                                                                   |
| OpenLMIS Tanzania Rebecca Alban, Info@openlmis.org                                                                                                                                                         |  |     | Yes |  |  | Yes |     | 1. Information, 2. Availability ,6. Efficiency, 8. Accountability | T. Logistics management information system                                                                                            |
| DYNAMIC Prof. Valérie D'Acromont, head of digital and global health at Unisanté, Lausanne or Dr. Irene Masanja, senior scientist at Ifakara Health Institute, Dar es Salaam, valerie.dacremont@swisstph.ch |  | Yes |     |  |  |     | Yes | 1. Information, 3. Quality, 5. Utilization, 6. Efficiency         | N. Health management information system,Q. Knowledge Management,R. Laboratory and Diagnostic System, S. Learning and training systems |
| Jamii ni Afya Heiko Hornung, hhornung@dtree.org                                                                                                                                                            |  | Yes |     |  |  | Yes |     | 1. Information                                                    | F. Community-based information system, Q. Knowledge management system                                                                 |

|                                                                                                                                                    |     |     |     |  |  |     |  |     |                                                                   |                                                                                      |
|----------------------------------------------------------------------------------------------------------------------------------------------------|-----|-----|-----|--|--|-----|--|-----|-------------------------------------------------------------------|--------------------------------------------------------------------------------------|
| Afya-Tek: Digital referral and decision support system using biometrics across the continuum of care Rebecca Litner, Rlitner@d-tree.org            |     | Yes |     |  |  |     |  | Yes | 5. Utilization,                                                   | I. Emergency response system                                                         |
| Access to Infant and Maternal (AIM) Health Plus Tanzania Daudi Sosthen Gambo, daudi_gambo@wvi.org                                                  |     | Yes |     |  |  | Yes |  |     | 1. Information, 2. Availability, 5. Utilization                   | F. Community-based information system, Q. Knowledge management system                |
| Smart Growth Diary Mwombeki Fabian, info@fabstech.com                                                                                              | Yes |     |     |  |  |     |  | Yes | 2. Availability, 3. Quality, 4. Acceptability                     | C. Client application, D. Client communications system                               |
| AfyaIntelligence Harrison Mariki, afyaintelligence@gmail.com                                                                                       |     | Yes | Yes |  |  |     |  | Yes | 1. Information, 2. Availability, 8. Accountability                | T. Logistics management information system , N. Health management information system |
| Hyperlocal Geospatial Data for Improving Vaccination Campaigns Asha Mustapher, omdtanzania@gmail.com                                               |     |     | Yes |  |  |     |  | Yes | 1. Information                                                    | F. Community-based information system, L. Geographic information system,             |
| mSpray` Anne Martin, acmartin@akros.com                                                                                                            |     |     | Yes |  |  |     |  | Yes | 1. Information,                                                   | F. Community-based information system                                                |
| eLMIS Facility Edition (FE) Wendy Bomett, wendy_bomett@zm.jsi.com                                                                                  |     | Yes | Yes |  |  |     |  | Yes | 1. Information, 2. Availability ,6. Efficiency, 8. Accountability | T. Logistics management information system                                           |
| MNCH mobile content with nutrition focus, available in Bemba, Nyanja and English in SMS and voice transcript format Kim Viljoen, kviljoen@gsma.com | Yes | Yes |     |  |  | Yes |  |     | 1. Information                                                    | C. Clients applications, D. Client communications system                             |

|                                                                                                                                                                                  |  |     |     |  |  |     |     |                                                                   |                                                                                     |
|----------------------------------------------------------------------------------------------------------------------------------------------------------------------------------|--|-----|-----|--|--|-----|-----|-------------------------------------------------------------------|-------------------------------------------------------------------------------------|
| ZEIR - Zambia Electronic Immunization Registry<br>Laurie Werner,<br>lwerne@path.org                                                                                              |  | Yes |     |  |  | Yes |     | 1. Information, 5. Utilization , 6. Efficiency                    | H. Electronic medical record                                                        |
| Zambia health Analytics Platform (ZHAP) Kaluba Mataka,<br>kaluba@zenysis.com                                                                                                     |  |     | Yes |  |  | Yes |     | 1. Information,                                                   | N. Health management information system, T. Logistics management information system |
| OpenLMIS Zambia Rebecca Alban, Info@openlmis.org                                                                                                                                 |  | Yes | Yes |  |  | Yes |     | 1. Information, 2. Availability, 6. Efficiency ,8. Accountability | T. Logistics management information system                                          |
| DelphiCare: Clinical decision support for comprehensive, longitudinal care of HIV-exposed and infected children and adolescents Douglas Watson, MD,<br>douglaswatsonmd@gmail.com |  | Yes |     |  |  |     | Yes | 3. Quality ,7.Cost                                                | Q. Knowledge management system,Y. Telemedicine                                      |
| Zambia immunization supply chain Arun Ramanujapuram, arun@logistimo.com                                                                                                          |  | Yes | Yes |  |  | Yes |     | 1. Information, 2. Availability, 6. Efficiency, 8. Accountability | T. Logistics management information system                                          |
| IDeAS. Integrated Decisions and Analytics Support. Mandy Dube, MDube@brhc.com                                                                                                    |  | Yes |     |  |  | Yes |     | 1. Information, 6. Efficiency                                     | H. Electronic medical records                                                       |
| SmartCare Electronic Health Record System Andrew Kashoka,<br>andrew.kashoka@moh.gov.zm                                                                                           |  | Yes |     |  |  | Yes |     | 1. Information, Efficiency                                        | H. Electronic medical record                                                        |
| Zambia Antenatal Care (ANC) Digital Adaption Project I Implementation Research Caren Chizuni, carenchizuni@gmail.com                                                             |  | Yes |     |  |  | Yes |     | 1. Information , 3. Quality                                       | F. Community-based information system,Q. Knowledge management system                |

|                                                                                                                                                         |     |     |     |  |     |     |     |  |                                        |                                                                       |
|---------------------------------------------------------------------------------------------------------------------------------------------------------|-----|-----|-----|--|-----|-----|-----|--|----------------------------------------|-----------------------------------------------------------------------|
| eNgoma Public Wi-Fi Chilufya Musosha, chilufya@e-ngoma.com                                                                                              |     |     | Yes |  |     |     | Yes |  | 1. Information, 8. Accountability      | D. Client communications system                                       |
| Implementation of a Performance-Based Financing Data System for Zimbabwe - using the open source tool Hesabu Benson Muzenda, Benson.Muzenda@cordaid.org |     |     | Yes |  |     |     | Yes |  | 1. Information, 3. Quality             | M. Health finance and insurance information system                    |
| Interactive SMS for VMMC Post-surgical follow up Caryl Feldacker, cfeld@uw.edu                                                                          |     |     | Yes |  |     | Yes |     |  | 5. Utilization                         | D. Client communication system                                        |
| Impilo EHR Dr. Robert Gongora, rgongora536@gmail.com                                                                                                    |     | Yes |     |  |     |     | Yes |  | 1. Information, 6. Efficiency,         | H. Electronic medical record                                          |
| COVID-19 Hub for Zimbabwe Kumbirai Matingo, matingonk@gmail.com                                                                                         | Yes |     |     |  |     |     |     |  | 1. Information                         | C. Client applications ,P. Identification registries and directories, |
| Telehealth                                                                                                                                              |     | Yes |     |  |     |     | Yes |  | 2. Availability                        | Y. Telemedicine                                                       |
| Free emergency numbers                                                                                                                                  | Yes | Yes |     |  |     |     | Yes |  | 2.Availability, 5.Utilization, 7. Cost | I. Emergency response system                                          |
| Health call centres                                                                                                                                     | Yes | Yes |     |  |     |     | Yes |  | 2.Availability, 5.Utilization, 7. Cost | I. Emergency response system, Y. Telemedicine                         |
| Mobile Health                                                                                                                                           | Yes | Yes |     |  |     | Yes |     |  | 2.Availability, 5.Utilization, 7. Cost | Y. Telemedicine                                                       |
| Community Mobilization                                                                                                                                  |     | Yes | Yes |  |     |     | Yes |  | 1.Information                          | D. Client communications system                                       |
| Access to information databases and tools                                                                                                               |     | Yes |     |  | Yes |     |     |  | 1.Information, 3.Quality               | S. Learning and training system                                       |
| Decision support system                                                                                                                                 |     | Yes |     |  |     | Yes |     |  | 3. Quality                             | Q. Knowledge management system                                        |

|                                           |     |     |     |  |     |     |     |     |                                                                  |                                                                 |
|-------------------------------------------|-----|-----|-----|--|-----|-----|-----|-----|------------------------------------------------------------------|-----------------------------------------------------------------|
| Supply chain information system           |     |     | Yes |  |     |     |     | Yes | 1. Information, 2. Availability, 6. Efficiency 8. Accountability | T. Logistics management information system                      |
| Telehealth                                |     | Yes |     |  |     |     | Yes |     | 2. Availability , 7. Cost                                        | Y. Telemedicine                                                 |
| Telehealth                                |     | Yes |     |  |     | Yes |     |     | 2. Availability 7. Cost                                          | Y. Telemedicine                                                 |
| Laboratory information system             |     | Yes |     |  |     |     |     | Yes | 6. Efficiency                                                    | R. Laboratory and diagnostic information system                 |
| Pharmacy information system               |     | Yes |     |  |     |     |     | Yes | 6. Efficiency                                                    | U. Pharmacy information system                                  |
| Electronic medical billing system         |     | Yes |     |  |     |     |     | Yes | 6. Efficiency, 8. Accountability                                 | M. Health finance and insurance information system              |
| Patient records                           |     | Yes |     |  |     |     |     | Yes | 1. Information, 6. Efficiency                                    | H. Electronic medical record                                    |
| mLearning                                 |     | Yes |     |  |     |     |     | Yes | 2. Availability, 3. Quality                                      | S. Learning and training system                                 |
| Decision support system                   |     | Yes |     |  |     |     |     | Yes | 3. Quality                                                       | Q. Knowledge management system                                  |
| Free emergency numbers                    | Yes | Yes |     |  |     |     | Yes |     | 2. Availability, 5. Utilization                                  | I. Emergency response system                                    |
| Health call centres                       | Yes | Yes |     |  |     |     | Yes |     | 2. Availability, 5. Utilization                                  | I. Emergency response system, Y. Telemedicine                   |
| Appointment reminders                     |     | Yes |     |  |     | Yes |     |     | 5. Utilization                                                   | D. Client communications system                                 |
| Mobile telehealth                         | Yes | Yes |     |  | Yes |     |     |     | 2. Availability, 7. Cost                                         | Y. Telemedicine                                                 |
| Disaster management                       |     |     | Yes |  |     | Yes |     |     | 2. Availability, 6. Efficiency                                   | I. Emergency response system                                    |
| Treatment adherence                       | Yes | Yes |     |  |     | Yes |     |     | 5. Utilization                                                   | C. Client application                                           |
| Community mobilization                    |     |     | Yes |  | Yes |     |     |     | 1. Information                                                   | D. Client communications system                                 |
| Access to information databases and tools |     | Yes |     |  |     |     | Yes |     | 1. Information, 3. Quality                                       | Q. Knowledge management system, S. Learning and training system |

|                                           |     |     |     |  |  |     |     |     |                                                                   |                                                                 |
|-------------------------------------------|-----|-----|-----|--|--|-----|-----|-----|-------------------------------------------------------------------|-----------------------------------------------------------------|
| Patient monitoring                        |     | Yes |     |  |  | Yes |     |     | 2. Availability, 5. Utilization, 7. Cost                          | Y. Telemedicine                                                 |
| Laboratory information system/PACS        |     | Yes |     |  |  |     |     | Yes | 6. Efficiency                                                     | R. Laboratory and diagnostic information system                 |
| Pharmacy information system               |     | Yes |     |  |  |     |     | Yes | 6. Efficiency                                                     | U. Pharmacy information system                                  |
| Automatic vaccine alert system            |     | Yes |     |  |  |     |     | Yes | 5. Utilization                                                    | D. Client communications system                                 |
| Supply chain information system           |     | Yes | Yes |  |  |     |     | Yes | 1. Information, 2. Availability, 6. Efficiency, 8. Accountability | T. Logistics management information system                      |
| e-Learning platform                       |     | Yes |     |  |  |     |     | Yes | 2. Availability, 3. Quality                                       | S. Learning and training system                                 |
| Free emergency numbers                    | Yes | Yes |     |  |  |     | Yes |     | 2. Availability, 5. Utilization                                   | I. Emergency response system                                    |
| Health call centres                       | Yes | Yes |     |  |  |     | Yes |     | 2. Availability, 5. Utilization                                   | I. Emergency response system, Y. Telemedicine                   |
| Appointment reminders                     |     | Yes |     |  |  |     | Yes |     | 5. Utilization                                                    | D. Client communications system                                 |
| mHealth                                   |     | Yes |     |  |  |     | Yes |     | 2. Availability, 7. Cost                                          | Y. Telemedicine                                                 |
| Community Mobilization                    |     |     | Yes |  |  |     | Yes |     | 1. Information                                                    | D. Client communications system                                 |
| Access to information databases and tools |     | Yes |     |  |  |     | Yes |     | 1. Information, 3. Quality                                        | Q. Knowledge management system, S. Learning and training system |
| Patient records                           |     | Yes |     |  |  |     | Yes |     | 1. Information, 6. Efficiency                                     | H. Electronic medical record                                    |
| m-Learning                                |     | Yes |     |  |  |     | Yes |     | 2. Availability, 3. Quality                                       | S. Learning and training system                                 |
| Decision support system                   |     | Yes |     |  |  |     | Yes |     | 3. Quality                                                        | Q. Knowledge management system                                  |
| Disaster management                       |     |     | Yes |  |  | Yes |     |     | 2. Availability                                                   | I. Emergency response system                                    |
| Telehealth                                |     | Yes |     |  |  | Yes |     |     | 2. Availability, 7. Cost                                          | Y. Telemedicine                                                 |



|                                           |     |     |     |  |     |     |     |                                                                   |                                                                 |
|-------------------------------------------|-----|-----|-----|--|-----|-----|-----|-------------------------------------------------------------------|-----------------------------------------------------------------|
| Electronic billing system                 |     | Yes |     |  |     |     | Yes | 6. Efficiency, 8. Accountability                                  | M. Health finance and insurance information system              |
| Supply chain information system           |     | Yes | Yes |  |     |     | Yes | 1. Information, 2. Availability, 6. Efficiency, 8. Accountability | T. Logistics management information system                      |
| Toll free emergency numbers               | Yes | Yes |     |  |     | Yes |     | 2. Availability, 5. Utilization                                   | I. Emergency response system                                    |
| Health call centres                       | Yes | Yes |     |  |     | Yes |     | 2. Availability, 5. Utilization, 7. Cost                          | I. Emergency response system, Y. Telemedicine                   |
| Appointment reminders                     |     | Yes |     |  |     | Yes |     | 5. Utilization                                                    | D. Client communications system                                 |
| Disaster management                       |     |     | Yes |  |     | Yes |     | 6. Efficiency                                                     | I. Emergency response system                                    |
| Treatment adherence                       | Yes | Yes |     |  |     | Yes |     | 5. Utilization                                                    | C. Client application                                           |
| Access to information databases and tools |     | Yes |     |  |     | Yes |     | 1. Information, 2. Availability, 3. Quality                       | Q. Knowledge management system, S. Learning and training system |
| mLearning                                 |     | Yes |     |  | Yes |     |     | 2. Availability, 3. Quality                                       | S. Learning and training system                                 |
| Patient monitoring                        |     | Yes |     |  | Yes |     |     | 5. Utilization, 7. Cost                                           | Y. Telemedicine                                                 |
| Disaster management                       |     |     | Yes |  |     | Yes |     | 2. Availability, 7. Cost                                          | I. Emergency response system                                    |
| Telehealth                                |     | Yes |     |  |     | Yes |     | 2. Availability, 7. Cost                                          | Y. Telemedicine                                                 |
| Electronic billing system                 |     | Yes |     |  |     |     | Yes | 6. Efficiency, 8. Accountability                                  | M. Health finance and insurance information system              |
| Supply chain information system           |     | Yes | Yes |  |     |     | Yes | 1. Information, 2. Availability, 6. Efficiency, 8. Accountability | T. Logistics management information system                      |
| Toll free emergency numbers               | Yes | Yes |     |  |     | Yes |     | 2. Availability, 5. Utilization                                   | I. Emergency response system                                    |
| Health call centres                       | Yes | Yes |     |  |     | Yes |     | 2. Availability, 5. Utilization, 7. Cost                          | I. Emergency response system, Y. Telemedicine                   |
| Appointment reminders                     |     | Yes |     |  |     | Yes |     | 5. Utilization                                                    | D. Client communications system                                 |

|                                           |     |     |     |  |     |  |     |     |                                                                   |                                                                 |
|-------------------------------------------|-----|-----|-----|--|-----|--|-----|-----|-------------------------------------------------------------------|-----------------------------------------------------------------|
| Disaster management                       |     |     | Yes |  |     |  | Yes |     | 6. Efficiency                                                     | I. Emergency response system                                    |
| Treatment adherence                       | Yes | Yes |     |  |     |  | Yes |     | 5. Utilization                                                    | C. Client application                                           |
| Access to information databases and tools |     | Yes |     |  |     |  | Yes |     | 1. Information, 2. Availability, 3. Quality                       | Q. Knowledge management system, S. Learning and training system |
| mLearning                                 |     | Yes |     |  | Yes |  |     |     | 2. Availability, 3. Quality                                       | S. Learning and training system                                 |
| Patient monitoring                        |     | Yes |     |  | Yes |  |     |     | 2. Availability, 5. Utilization, 7. Cost                          | Y. Telemedicine                                                 |
| Telehealth                                |     | Yes |     |  |     |  | Yes |     | 2. Availability, 7. Cost                                          | Y. Telemedicine                                                 |
| Telehealth                                |     | Yes |     |  | Yes |  |     |     | 2. Availability, 7. Cost                                          | Y. Telemedicine                                                 |
| Electronic Health record                  |     | Yes |     |  |     |  |     | Yes | 1. Information, 6. Efficiency                                     | H. Electronic medical record                                    |
| Laboratory information system             |     | Yes |     |  |     |  |     | Yes | 6. Efficiency                                                     | R. Laboratory and diagnostic information system                 |
| Pharmacy information system               |     | Yes |     |  |     |  |     | Yes | 6. Efficiency                                                     | U. Pharmacy information system                                  |
| Electronic medical billing system         |     | Yes |     |  |     |  |     | Yes | 6. Efficiency, 8. Accountability                                  | M. Health finance and insurance information system              |
| Supply chain information system           |     | Yes | Yes |  |     |  |     | Yes | 1. Information, 2. Availability, 6. Efficiency, 8. Accountability | T. Logistics management information system                      |
| e-Learning platform                       |     | Yes |     |  |     |  |     | Yes | 2 Availability, 3. Quality                                        | S. Learning and training system                                 |
| Toll free emergency numbers               | Yes | Yes |     |  |     |  | Yes |     | 2. Availability                                                   | I. Emergency response system                                    |
| Health call centres                       | Yes | Yes |     |  |     |  | Yes |     | 2. Availability                                                   | I. Emergency response system, Y. Telemedicine                   |
| Appointment reminders                     |     | Yes |     |  |     |  | Yes |     | 5. Utilization                                                    | D. Client communications system                                 |
| Mobile telehealth                         | Yes | Yes |     |  |     |  | Yes |     | 2. Availability, 7. Cost                                          | Y. Telemedicine                                                 |
| Disaster management                       |     |     | Yes |  |     |  | Yes |     | 6. Efficiency                                                     | I. Emergency response system                                    |

|                                           |     |     |     |  |     |     |     |     |                                                                   |                                                                 |
|-------------------------------------------|-----|-----|-----|--|-----|-----|-----|-----|-------------------------------------------------------------------|-----------------------------------------------------------------|
| Treatment adherence                       | Yes | Yes |     |  |     | Yes |     |     | 5. Utilization                                                    | C. Client application                                           |
| Access to information databases and tools |     | Yes |     |  |     | Yes |     |     | 1. Information, 2. Availability, 3. Quality                       | Q. Knowledge management system, S. Learning and training system |
| m-Learning                                |     | Yes |     |  |     |     | Yes |     | 2. Availability, 3. Quality                                       | S. Learning and training system                                 |
| Telehealth                                |     | Yes |     |  |     |     | Yes |     | 2. Availability, 7. Cost                                          | Y. Telemedicine                                                 |
| Telehealth                                |     | Yes |     |  |     |     | Yes |     | 2. Availability, 7. Cost                                          | Y. Telemedicine                                                 |
| Supply chain information system           |     | Yes | Yes |  |     |     | Yes |     | 1. Information, 2. Availability, 6. Efficiency, 8. Accountability | T. Logistics management information system                      |
| e-Learning platform                       |     | Yes |     |  |     |     | Yes |     | 2. Availability, 3. Quality                                       | S. Learning and training system                                 |
| Toll free emergency                       | Yes | Yes |     |  |     |     | Yes |     | 2. Availability                                                   | I. Emergency response system                                    |
| Appointment reminders                     |     | Yes |     |  |     |     |     | Yes | 5. Utilization                                                    | D. Client communications system                                 |
| Disaster management                       |     |     | Yes |  | Yes |     |     |     | 6. Efficiency                                                     | I. Emergency response system                                    |
| Community mobilization                    |     |     | Yes |  |     |     |     | Yes | 1. Information                                                    | D. Client communications system                                 |
| Electronic billing system                 |     | Yes |     |  |     |     |     | Yes | 6. Efficiency, 8. Accountability                                  | M. Health finance and insurance information system              |
| Supply chain information system           |     | Yes | Yes |  |     |     | Yes |     | 1. Information, 2. Availability, 6. Efficiency, 8. Accountability | T. Logistics management information system                      |
| e-Learning platform                       |     | Yes |     |  |     |     |     | Yes | 2. Availability, 3. Quality                                       | S. Learning and training system                                 |
| Toll free Emergency                       | Yes | Yes |     |  |     |     | Yes |     | 2. Availability                                                   | I. Emergency response system                                    |
| Call centres and numbers                  | Yes | Yes |     |  |     |     | Yes |     | 2. Availability                                                   | I. Emergency response system                                    |
| Disaster management                       |     |     | Yes |  |     | Yes |     |     | 6. Efficiency                                                     | I. Emergency response system, Y. Telemedicine                   |
| Community mobilization                    |     |     | Yes |  |     |     | Yes |     | 1. Information                                                    | D. Client communications system                                 |

|                                           |     |     |     |  |     |     |     |     |                                                                   |                                                                 |
|-------------------------------------------|-----|-----|-----|--|-----|-----|-----|-----|-------------------------------------------------------------------|-----------------------------------------------------------------|
| Access to information databases and tools |     | Yes |     |  |     |     | Yes |     | 1. Information, 2. Availability, 3. Quality                       | Q. Knowledge management system, S. Learning and training system |
| Patient records                           |     | Yes |     |  | Yes | Yes |     |     | 1. Information, 6. Efficiency                                     | H. Electronic medical record                                    |
| m-Learning                                |     | Yes |     |  |     | Yes | Yes |     | 2. Availability, 3. Quality                                       | S. Learning and training system                                 |
| Patient monitoring                        | Yes | Yes |     |  |     |     | Yes |     | 6. Utilization                                                    | Y. Telemedicine                                                 |
| Telehealth                                |     | Yes |     |  | Yes |     |     | Yes | 2. Availability, 7. Cost                                          | Y. Telemedicine                                                 |
| Supply chain information system           |     | Yes | Yes |  |     |     |     | Yes | 1. Information, 2. Availability, 6. Efficiency, 8. Accountability | T. Logistics management information system                      |
| Laboratory information system             |     | Yes |     |  |     |     |     | Yes | 6. Efficiency                                                     | R. Laboratory and diagnostic information system                 |
| Pharmacy information system               |     | Yes |     |  |     |     |     | Yes | 6. Efficiency                                                     | U. Pharmacy information system                                  |
| Electronic billing system                 |     | Yes |     |  |     |     |     | Yes | 6. Efficiency, 8. Accountability                                  | M. Health finance and insurance information system              |
| Supply chain information system           |     | Yes | Yes |  |     |     |     | Yes | 1. Information, 2. Availability, 6. Efficiency, 8. Accountability | T. Logistics management information system                      |
| Telehealth                                |     | Yes |     |  |     | Yes |     |     | 2. Availability, 7. Cost                                          | Y. Telemedicine                                                 |
| e-Learning platform                       |     | Yes |     |  |     | Yes |     |     | 2. Availability, 3. Quality                                       | S. Learning and training system                                 |
| Appointment reminders                     |     | Yes |     |  |     | Yes |     |     | 5. Utilization                                                    | D. Client communications system                                 |
| Mobile telehealth                         |     | Yes |     |  |     | Yes |     |     | 2. Availability, 7. Cost                                          | Y. Telemedicine                                                 |
| Disaster management                       |     |     | Yes |  |     | Yes |     |     | 6. Efficiency                                                     | I. Emergency response system                                    |
| Treatment adherence                       | Yes | Yes |     |  |     | Yes |     |     | 5. Utilization                                                    | C. Client application                                           |
| Community mobilization                    |     | Yes |     |  |     | Yes |     |     | 1. Information                                                    | D. Client communications system                                 |
| Patient records                           |     | Yes |     |  |     | Yes |     |     | 1. Information, 6. Efficiency                                     | H. Electronic medical record                                    |

|                                           |     |     |     |  |     |     |     |     |                                                                   |                                                                 |
|-------------------------------------------|-----|-----|-----|--|-----|-----|-----|-----|-------------------------------------------------------------------|-----------------------------------------------------------------|
| m-Learning                                |     | Yes |     |  |     | Yes |     |     | 2. Availability, 3. Quality                                       | S. Learning and training system                                 |
| Decision support system                   |     | Yes |     |  |     | Yes |     |     | 3. Quality                                                        | Q. Knowledge management system                                  |
| Telehealth                                |     | Yes |     |  |     |     | Yes |     | 2. Availability, 7. Cost                                          | Y. Telemedicine                                                 |
| Electronic billing system                 |     | Yes |     |  |     |     |     | Yes | 6. Efficiency, 9. Accountability                                  | M. Health finance and insurance information system              |
| Supply chain information system           |     | Yes | Yes |  |     |     |     | Yes | 1. Information, 2. Availability, 6. Efficiency, 8. Accountability | T. Logistics management information system                      |
| e-Learning platform                       |     | Yes |     |  |     |     |     | Yes | 2 Availability, 3. Quality                                        | S. Learning and training system                                 |
| Toll free emergency numbers               | Yes | Yes |     |  |     |     | Yes |     | 2. Availability                                                   | I. Emergency response system                                    |
| Health call centres                       | Yes | Yes |     |  |     |     | Yes |     | 2. Availability                                                   | I. Emergency response system, Y. Telemedicine                   |
| Appointment reminders                     |     | Yes |     |  |     | Yes |     |     | 5. Utilization                                                    | D. Client communications system                                 |
| Mobile telehealth                         | Yes | Yes |     |  |     |     | Yes |     | 2. Availability, 7. Cost                                          | Y. Telemedicine                                                 |
| Disaster management                       |     |     | Yes |  |     | Yes |     |     | 6. Efficiency                                                     | I. Emergency response system                                    |
| Community mobilization                    |     |     | Yes |  | Yes |     |     |     | 1. Information                                                    | D. Client communications system                                 |
| Access to information databases and tools |     | Yes |     |  | Yes |     |     |     | 1. Information, 3. Quality                                        | Q. Knowledge management system, S. learning and training system |
| Patient records                           |     | Yes |     |  |     |     | Yes |     | 1. Information, 6. Efficiency                                     | H. Electronic medical records                                   |
| m-Learning                                |     | Yes |     |  | Yes |     |     |     | 3. Quality                                                        | S. Learning and training system                                 |
| Decision support system                   |     |     | Yes |  |     |     | Yes |     | 1. Information                                                    | Q. Knowledge management system                                  |
| Telehealth                                |     | Yes |     |  |     | Yes |     |     | 2. Availability, 7. Cost                                          | Y. Telemedicine                                                 |
| Electronic billing system                 |     | Yes |     |  |     |     |     | Yes | 6. Efficiency, 8. Accountability                                  | M. Health finance and insurance information system              |

|                                           |     |     |     |  |     |     |  |     |                                                                   |                                                                 |
|-------------------------------------------|-----|-----|-----|--|-----|-----|--|-----|-------------------------------------------------------------------|-----------------------------------------------------------------|
| Supply chain information system           |     | Yes | Yes |  |     |     |  | Yes | 1. Information, 2. Availability, 6. Efficiency, 8. Accountability | T. Logistics management information system                      |
| e-Learning platform                       |     | Yes |     |  |     |     |  | Yes | 2. Availability, 3. Quality                                       | S. Learning and training system                                 |
| Toll free emergency                       | Yes | Yes |     |  | Yes |     |  |     | 2. Availability                                                   | I. Emergency response system                                    |
| Call centres and numbers                  | Yes | Yes |     |  |     | Yes |  |     | 2. Availability                                                   | I. Emergency response system, Y. Telemedicine                   |
| Appointment reminders                     |     | Yes |     |  | Yes |     |  |     | 5. Utilization                                                    | D. Client communications system                                 |
| Mobile telehealth                         |     | Yes |     |  |     | Yes |  |     | 2. Availability, 7. Cost                                          | Y. Telemedicine                                                 |
| Disaster management                       |     |     | Yes |  |     | Yes |  |     | 6. Efficiency                                                     | I. Emergency response system                                    |
| Treatment adherence                       | Yes | Yes |     |  |     | Yes |  |     | 5. Utilization                                                    | C. Client application                                           |
| Community mobilization                    |     |     | Yes |  | Yes |     |  |     | 1. Information                                                    | D. Client communications system                                 |
| Access to information databases and tools |     | Yes |     |  |     | Yes |  |     | 1. Information, 2. Availability, 3. Quality                       | Q. Knowledge management system, S. learning and training system |
| Patient records                           |     | Yes |     |  |     | Yes |  |     | 1. Information, 6. Efficiency                                     | H. Electronic medical records                                   |
| m-Learning                                |     | Yes |     |  |     | Yes |  |     | 2. Availability, 3. Quality                                       | S. Learning and training system                                 |
| Decision support system                   |     | Yes |     |  |     | Yes |  |     | 3. Quality                                                        | Q. Knowledge management system                                  |
| Telehealth                                |     | Yes |     |  |     | Yes |  |     | 2. Availability, 7. Cost                                          | Y. Telemedicine                                                 |
| Electronic billing system                 |     | Yes |     |  |     |     |  | Yes | 6. Efficiency, 8. Accountability                                  | M. Health finance and insurance information system              |
| Supply chain information system           |     | Yes | Yes |  |     |     |  | Yes | 1. Information, 2. Availability, 6. Efficiency, 8. Accountability | T. Logistics management information system                      |
| e-Learning platform                       |     | Yes |     |  |     |     |  | Yes | 2. Availability, 3. Quality                                       | S. Learning and training system                                 |
| Toll free emergency                       | Yes | Yes |     |  |     | Yes |  |     | 2. Availability                                                   | I. Emergency response system                                    |

|                                           |     |     |     |  |     |     |     |  |                                                                   |                                                                 |
|-------------------------------------------|-----|-----|-----|--|-----|-----|-----|--|-------------------------------------------------------------------|-----------------------------------------------------------------|
| Mobile telehealth                         | Yes | Yes |     |  |     | Yes |     |  | 2. Availability, 7. Cost                                          | Y. Telemedicine                                                 |
| Disaster management                       |     |     | Yes |  | Yes |     |     |  | 6. Efficiency                                                     | I. Emergency response system                                    |
| Community mobilization                    |     |     | Yes |  | Yes |     |     |  | 1. Information                                                    | D. Client communications system                                 |
| Access to information databases and tools |     | Yes |     |  |     | Yes |     |  | 1. Information, 3. Quality                                        | Q. Knowledge management system, S. learning and training system |
| Patient monitoring                        |     | Yes |     |  | Yes |     |     |  | 5. Utilization, 7. Cost                                           | Y. Telemedicine                                                 |
| Telehealth                                |     | Yes |     |  | Yes |     |     |  | 2. Availability, 7. Cost                                          | Y. Telemedicine                                                 |
| Electronic billing system                 |     | Yes |     |  |     |     | Yes |  | 6. Efficiency, 8. Accountability                                  | M. Health finance and insurance information system              |
| Supply chain information system           |     | Yes | Yes |  |     |     | Yes |  | 1. Information, 2. Availability, 6. Efficiency, 8. Accountability | T. Logistics management information system                      |
| e-Learning platform                       |     | Yes |     |  |     |     | Yes |  | 2. Availability, 3. Quality                                       | S. Learning and training system                                 |
| Toll-free emergency number                | Yes | Yes |     |  |     |     | Yes |  | 2. Availability                                                   | I. Emergency response system                                    |
| Call centres and numbers                  | Yes | Yes |     |  |     |     | Yes |  | 2. Availability                                                   | I. Emergency response system, Y. Telemedicine                   |
| Appointment reminders                     |     | Yes |     |  | Yes |     |     |  | 5. Utilization                                                    | D. Client communications system                                 |
| Mobile telehealth                         | Yes | Yes |     |  | Yes |     |     |  | 2. Availability, 7. Cost                                          | Y. Telemedicine                                                 |
| Disaster management                       |     |     | Yes |  |     |     | Yes |  | 6. Efficiency                                                     | I. Emergency response system                                    |
| Treatment adherence                       | Yes | Yes |     |  | Yes |     |     |  | 5. Utilization                                                    | C. Client application                                           |
| Community mobilization                    |     |     | Yes |  | Yes |     |     |  | 1. Information                                                    | D. Client communications system                                 |
| Access to information databases and tools | Yes | Yes |     |  | Yes |     |     |  | 1. Information, 2. Availability, 3. Quality                       | Q. Knowledge management system, S. learning and training system |
| m-Learning                                |     | Yes |     |  |     |     | Yes |  | 2. Availability, 3. Quality                                       | S. Learning and training system                                 |
| Decision support system                   |     | Yes |     |  | Yes |     |     |  | 3. Quality                                                        | Q. Knowledge management system                                  |

|                                           |     |     |     |  |     |     |     |  |                                                                   |                                                                 |
|-------------------------------------------|-----|-----|-----|--|-----|-----|-----|--|-------------------------------------------------------------------|-----------------------------------------------------------------|
| Patient monitoring                        |     | Yes |     |  | Yes |     |     |  | 1. Information, 3. Quality, 7. Cost                               | Y. Telemedicine                                                 |
| Telehealth                                |     | Yes |     |  |     | Yes |     |  | 2. Availability, 7. Cost                                          | Y. Telemedicine                                                 |
| Telehealth                                |     | Yes |     |  | Yes |     |     |  | 2. Availability, 7. Cost                                          | Y. Telemedicine                                                 |
| e-Learning platform                       |     | Yes |     |  |     |     | Yes |  | 3. Quality                                                        | S. Learning and training system                                 |
| Toll-free emergency number                | Yes | Yes |     |  |     | Yes |     |  | 2. Availability                                                   | I. Emergency response system                                    |
| Health call centres                       |     | Yes |     |  |     | Yes |     |  | 2. Availability                                                   | I. Emergency response system, Y. Telemedicine                   |
| Appointment reminders                     |     | Yes |     |  |     | Yes |     |  | 5. Utilization                                                    | D. Client communications system                                 |
| Mobile telehealth                         |     | Yes |     |  |     | Yes |     |  | 2. Availability, 7. Cost                                          | Y. Telemedicine                                                 |
| Disaster management                       |     |     | Yes |  |     | Yes |     |  | 6. Efficiency                                                     | I. Emergency response system                                    |
| Community Mobilization                    |     |     | Yes |  |     | Yes |     |  | 1. Information                                                    | D. Client communications system                                 |
| Access to information databases and tools |     | Yes |     |  |     | Yes |     |  | 1. Information, 2. Availability, 3. Quality                       | Q. Knowledge management system, S. learning and training system |
| Patient records                           |     | Yes |     |  |     | Yes |     |  | 1. Information, 6. Efficiency                                     | H. Electronic medical records                                   |
| Decision support system                   |     | Yes |     |  |     | Yes |     |  | 3. Quality                                                        | Q. Knowledge management system                                  |
| Patient monitoring                        |     | Yes |     |  |     | Yes |     |  | 5. Utilization, 7. Cost                                           | Y. Telemedicine                                                 |
| Telehealth                                |     | Yes |     |  |     | Yes |     |  | 2. Availability, 7. Cost                                          | Y. Telemedicine                                                 |
| Telehealth                                |     | Yes |     |  | Yes |     |     |  | 2. Availability, 7. Cost                                          | Y. Telemedicine                                                 |
| Electronic billing system                 |     | Yes |     |  |     |     | Yes |  | 6. Efficiency, 8. Accountability                                  | M. Health finance and insurance information system              |
| Supply chain information system           |     | Yes | Yes |  |     |     | Yes |  | 1. Information, 2. Availability, 6. Efficiency, 8. Accountability | T. Logistics management information system                      |
| e-Learning platform                       |     | Yes |     |  |     |     | Yes |  | 2. Availability, 3. Quality                                       | S. Learning and training system                                 |



|                                           |     |     |     |  |     |     |     |  |                                             |                                                                 |
|-------------------------------------------|-----|-----|-----|--|-----|-----|-----|--|---------------------------------------------|-----------------------------------------------------------------|
| Toll free emergency                       | Yes | Yes |     |  |     | Yes |     |  | 2. Availability                             | I. Emergency response system                                    |
| Call centres and numbers                  | Yes | Yes |     |  |     |     | Yes |  | 2. Availability                             | I. Emergency response system, Y. Telemedicine                   |
| Appointment reminders                     |     | Yes |     |  |     | Yes |     |  | 5. Utilization                              | D. Client communications system                                 |
| Mobile telehealth                         | Yes | Yes |     |  | Yes | Yes |     |  | 2. Availability, 7. Cost                    | Y. Telemedicine                                                 |
| Disaster management                       |     |     | Yes |  |     |     | Yes |  | 6. Efficiency                               | I. Emergency response system                                    |
| Treatment adherence                       | Yes | Yes |     |  |     | Yes |     |  | 5. Utilization                              | D. Client communications system                                 |
| Community mobilization                    |     |     | Yes |  |     |     | Yes |  | 1. Information                              | D. Client communications system                                 |
| Access to information databases and tools |     | Yes |     |  |     | Yes | Yes |  | 1. Information, 2. Availability, 3. Quality | Q. Knowledge management system, S. learning and training system |
| Patient records                           |     | Yes |     |  |     | Yes | Yes |  | 1. Information, 6. Efficiency               | H. Electronic medical records                                   |
| m-Learning                                |     | Yes |     |  |     |     | Yes |  | 2. Availability,                            | S. Learning and training system                                 |
| Decision support system                   |     | Yes |     |  |     | Yes | Yes |  | 3. Quality                                  | Q. Knowledge management system                                  |
| Patient monitoring                        |     | Yes |     |  |     | Yes |     |  | 5. Utilization, 7. Cost                     | Y. Telemedicine                                                 |
| Health call centres                       |     | Yes |     |  |     |     | Yes |  | 2. Availability, 7. Cost                    | Y. Telemedicine                                                 |
| Appointment reminders                     |     | Yes |     |  |     | Yes |     |  | 5. Utilization                              | D. Client communications system                                 |
| Mobile telehealth                         | Yes | Yes |     |  |     | Yes |     |  | 2. Availability, 7. Cost                    | Y. Telemedicine                                                 |
| Treatment adherence                       |     | Yes |     |  |     | Yes | Yes |  | 5. Utilization                              | D. Client communications system                                 |
| Community mobilization                    |     |     | Yes |  |     |     |     |  | 1. Information                              | D. Client communications system                                 |
| Access to information databases and tools |     | Yes |     |  |     | Yes |     |  | 1. Information, 2. Availability, 3. Quality | Q. Knowledge management system, S. learning and training system |
| Patient records                           |     | Yes |     |  |     | Yes |     |  | 1. Information, 6. Efficiency               | H. Electronic medical records                                   |
| Patient monitoring                        |     | Yes |     |  |     |     | Yes |  | 5. Utilization, 7. Cost                     | Y. Telemedicine                                                 |
| Health call centres                       | Yes | Yes |     |  |     | Yes |     |  | 2. Availability, 7. Cost                    | Y. Telemedicine                                                 |

|                                 |     |     |     |  |  |  |     |     |                                                                   |                                                    |
|---------------------------------|-----|-----|-----|--|--|--|-----|-----|-------------------------------------------------------------------|----------------------------------------------------|
| Community mobilization          |     |     | Yes |  |  |  | Yes |     | 1. Information                                                    | D. Client communications system                    |
| Telehealth                      |     | Yes |     |  |  |  | Yes |     | 2. Availability, 7. Cost                                          | Y. Telemedicine                                    |
| Electronic billing system       |     | Yes |     |  |  |  |     | Yes | 6. Efficiency, 8. Accountability                                  | M. Health finance and insurance information system |
| Supply chain information system |     | Yes | Yes |  |  |  |     | Yes | 1. Information, 2. Availability, 6. Efficiency, 8. Accountability | T. Logistics management information system         |
| e-Learning platform             |     | Yes |     |  |  |  |     | Yes | 2. Availability, 3. Quality                                       | S. Learning and training system                    |
| Toll-free emergency number      | Yes | Yes |     |  |  |  | Yes |     | 2. Availability                                                   | I. Emergency response system                       |
| Health call centres             | Yes | Yes |     |  |  |  | Yes |     | 2. Availability                                                   | I. Emergency response system, Y. Telemedicine      |
| Mobile telehealth               | Yes | Yes |     |  |  |  | Yes |     | 2. Availability, 7. Cost                                          | Y. Telemedicine                                    |
| Disaster management             |     |     | Yes |  |  |  | Yes |     | 6. Efficiency                                                     | I. Emergency response system                       |
| Community mobilization          |     |     | Yes |  |  |  | Yes |     | 1. Information                                                    | D. Client communications system                    |
| Decision support system         |     | Yes |     |  |  |  | Yes |     | 3. Quality                                                        | Q. Knowledge management system                     |
| Telehealth                      |     | Yes |     |  |  |  | Yes |     | 2. Availability, 7. Cost                                          | Y. Telemedicine                                    |
| Telehealth                      |     | Yes |     |  |  |  | Yes |     | 2. Availability, 7. Cost                                          | Y. Telemedicine                                    |
| Electronic billing system       |     | Yes |     |  |  |  |     | Yes | 6. Efficiency, 8. Accountability                                  | M. Health finance and insurance information system |
| Supply chain information system |     | Yes | Yes |  |  |  |     | Yes | 1. Information, 2. Availability, 6. Efficiency, 8. Accountability | T. Logistics management information system         |
| e-Learning platform             |     | Yes |     |  |  |  |     | Yes | 2. Availability, 3. Quality                                       | S. Learning and training system                    |
| Toll free emergency numbers     | Yes | Yes |     |  |  |  | Yes |     | 2. Availability                                                   | I. Emergency response system                       |
| Health call centres             | Yes | Yes |     |  |  |  | Yes |     | 2. Availability                                                   | I. Emergency response system, Y. Telemedicine      |

|                                           |     |     |     |  |     |     |     |     |                                                                 |                                                                 |
|-------------------------------------------|-----|-----|-----|--|-----|-----|-----|-----|-----------------------------------------------------------------|-----------------------------------------------------------------|
| Appointment reminders                     |     | Yes |     |  |     | Yes |     |     | 5. Utilization                                                  | D. Client communications system                                 |
| Mobile telehealth                         | Yes | Yes |     |  | Yes |     |     |     | 2. Availability, 7. Cost                                        | Y. Telemedicine                                                 |
| Disaster management                       |     |     | Yes |  |     |     | Yes |     | 6. Efficiency                                                   | I. Emergency response system                                    |
| Treatment adherence                       | Yes | Yes |     |  |     | Yes |     |     | 5. Utilization                                                  | D. Client communications system                                 |
| Community mobilization                    |     |     | Yes |  |     | Yes |     |     | 1. Information                                                  | D. Client communications system                                 |
| Access to information databases and tools |     | Yes |     |  |     |     | Yes |     | 1. Information, 2. Availability,3. Quality                      | Q. Knowledge management system, S. learning and training system |
| Patient records                           |     | Yes |     |  |     |     | Yes |     | 1. Information, 6. Efficiency                                   | H. Electronic medical records                                   |
| mLearning                                 |     | Yes |     |  |     |     | Yes |     | 2.Availability, 3. Quality                                      | S. Learning and training system                                 |
| Decision support system                   |     | Yes |     |  |     |     | Yes |     | 3. Quality                                                      | Q. Knowledge management system                                  |
| Patient monitoring                        |     | Yes |     |  |     |     | Yes |     | 5. Utilization, 7. Cost                                         | Y. Telemedicine                                                 |
| Telehealth                                |     | Yes |     |  |     |     |     | Yes | 2. Availability, 7. Cost                                        | Y. Telemedicine                                                 |
| Supply chain information system           |     | Yes | Yes |  |     |     |     | Yes | 1. Information, 2. Availability,6. Efficiency,8. Accountability | T. Logistics management information system                      |
| e-Learning platform                       |     | Yes |     |  |     |     |     | Yes | 2. Availability, 3. Quality                                     | S. Learning and training system                                 |
| Toll free emergency numbers               | Yes | Yes |     |  |     |     |     | Yes | 2. Availability                                                 | I. Emergency response system                                    |
| Health call centres                       | Yes | Yes |     |  |     |     |     | Yes | 2. Availability, 7. Cost                                        | I. Emergency response system, Y. Telemedicine                   |
| Appointment reminders                     | Yes | Yes |     |  |     |     |     | Yes | 5. Utilization                                                  | D. Client communications system                                 |
| Treatment adherence                       | Yes | Yes |     |  |     |     |     | Yes | 5. Utilization                                                  | D. Client communications system                                 |
| Community mobilization                    |     |     | Yes |  |     |     |     | Yes | 1. Information                                                  | D. Client communications system                                 |
| Patient monitoring                        |     | Yes |     |  |     | Yes |     |     | 5. Utilization, 7. Cost                                         | Y. Telemedicine                                                 |
| m-Learning                                |     | Yes |     |  |     |     |     | Yes | 2. Availability, 3. Quality                                     | S. Learning and training system                                 |

|                                                                                          |     |     |     |  |     |     |     |     |                                             |                                                                 |
|------------------------------------------------------------------------------------------|-----|-----|-----|--|-----|-----|-----|-----|---------------------------------------------|-----------------------------------------------------------------|
| Decision support system                                                                  |     | Yes |     |  |     |     |     | Yes | 3. Quality                                  | Q. Knowledge management system                                  |
| Telehealth                                                                               |     | Yes |     |  |     |     |     | Yes | 2. Availability, 7. Cost                    | Y. Telemedicine                                                 |
| Telehealth                                                                               |     | Yes |     |  | Yes |     |     |     | 2. Availability, 7. Cost                    | Y. Telemedicine                                                 |
| Telehealth                                                                               |     | Yes |     |  |     |     | Yes |     | 2. Availability, 7. Cost                    | Y. Telemedicine                                                 |
| Telehealth                                                                               |     | Yes |     |  |     | Yes |     |     | 2. Availability, 7. Cost                    | Y. Telemedicine                                                 |
| e-Learning platform                                                                      |     | Yes |     |  |     |     |     | Yes | 2. Availability, 3. Quality                 | S. Learning and training system                                 |
| Toll free emergency                                                                      | Yes | Yes |     |  |     |     |     | Yes | 2. Availability                             | I. Emergency response system                                    |
| Health call centres                                                                      | Yes | Yes |     |  |     | Yes |     |     | 2. Availability, 7. Cost                    | I. Emergency response system, Y. Telemedicine                   |
| Appointment reminders                                                                    |     | Yes |     |  |     | Yes |     |     | 5. Utilization                              | D. Client communications system                                 |
| Mobile telehealth                                                                        | Yes | Yes |     |  | Yes |     | Yes |     | 2. Availability, 7. Cost                    | Y. Telemedicine                                                 |
| Disaster management                                                                      |     |     | Yes |  | Yes |     | Yes |     | 6. Efficiency                               | I. Emergency response system                                    |
| Treatment adherence                                                                      |     | Yes |     |  |     | Yes |     |     | 5. Utilization                              | D. Client communications system                                 |
| Community Mobilization                                                                   |     |     | Yes |  |     | Yes |     |     | 1. Information                              | D. Client communications system                                 |
| Access to information databases and tools                                                | Yes | Yes |     |  |     |     | Yes |     | 1. Information, 2. Availability, 3. Quality | Q. Knowledge management system, S. Learning and training system |
| Patient records                                                                          |     | Yes |     |  | Yes |     |     |     | 1. Information, 6. Efficiency               | H. Electronic medical records                                   |
| mLearning                                                                                |     | Yes |     |  | Yes |     |     |     | 2. Availability, 3. Quality                 | S. Learning and training system                                 |
| Decision support system                                                                  |     | Yes |     |  | Yes |     |     |     | 3. Quality                                  | Q. Knowledge management system                                  |
| Patient monitoring                                                                       |     |     | Yes |  |     |     | Yes |     | 1. Information, 6. Efficiency, 7. Cost      | Y. Telemedicine                                                 |
| m-health applications in Botswana: telemedicine and education, Littman-Quinn et al; 2013 |     | Yes |     |  |     | Yes |     |     | 2. Availability, 3. Quality, 7. Cost        | S. Learning and training system, Y. Telemedicine                |

|                                                                                                                                                                               |  |     |     |  |  |     |     |  |                                                            |                                                                                           |
|-------------------------------------------------------------------------------------------------------------------------------------------------------------------------------|--|-----|-----|--|--|-----|-----|--|------------------------------------------------------------|-------------------------------------------------------------------------------------------|
| e-MANIC, Institut de Recherche en Sciences de la Sante, Burkina Faso,2020                                                                                                     |  | Yes |     |  |  | Yes |     |  | 3. Quality                                                 | R. Laboratory and diagnostics information system                                          |
| Smart glasses for telemedicine, Diaka et al;2021                                                                                                                              |  | Yes |     |  |  | Yes |     |  | 2. Availability, 5. Utilization, 7.Cost                    | Y. Telemedicine                                                                           |
| Cloud-based peri-operative registry,Network of perioperative critical care, 2020                                                                                              |  | Yes |     |  |  |     | Yes |  | 2. Availability, 3. Quality, 5. Utilization, 6. Efficiency | K. Facility management information system,                                                |
| mHealth Intervention on Delivery and Postnatal Care Utilization, Spigt et al; 2016                                                                                            |  | Yes |     |  |  | Yes |     |  | 1. Information, 5. Utilization                             | D. Client communications system                                                           |
| USAID Digital Health Activity (DHA), <a href="https://www.jsi.com/project/digital-health-activity/">https://www.jsi.com/project/digital-health-activity/</a>                  |  |     | Yes |  |  |     | Yes |  | 1. Information, 2. Availability, 3. Quality, 6. Efficiency | N. Health management information system, V. Public health and disease surveillance system |
| Cloud-based electronic data system, Jede et al;2020                                                                                                                           |  | Yes |     |  |  | Yes |     |  | 1. Information , 6. Efficiency                             | H. Electronic medical record                                                              |
| 'virtual ward' (VW) system, Wariri et al; 2021                                                                                                                                |  | Yes |     |  |  | Yes |     |  | 2. Availability, 7. Cost                                   | Y. Telemedicine                                                                           |
| Empower Health software, Otieno et al;2020                                                                                                                                    |  | Yes |     |  |  | Yes |     |  | 2. Availability, 3. Quality, 6. Efficiency                 | Y. Telemedicine D. Client communications system                                           |
| COVID-19 Tracker App, <a href="https://www.itu.int/hub/2020/05/ghana-launches-covid-19-tracker-app/">https://www.itu.int/hub/2020/05/ghana-launches-covid-19-tracker-app/</a> |  |     | Yes |  |  |     | Yes |  | 1. Information                                             | N. Health management information system, V. Public health and disease surveillance system |
| mHealth to Train Community Health Nurses, Asgary et al; 2016                                                                                                                  |  | Yes |     |  |  | Yes |     |  | 2. Availability, 3. Quality                                | S. Learning and training system                                                           |
| Telecytology in East Africa, Kumar et al;2012                                                                                                                                 |  | Yes |     |  |  | Yes |     |  | 2. Availability, 3. Quality                                | R. Laboratory and diagnostics information system                                          |

|                                                                                                                                               |     |     |  |  |  |     |  |  |                                                                         |                                                                           |
|-----------------------------------------------------------------------------------------------------------------------------------------------|-----|-----|--|--|--|-----|--|--|-------------------------------------------------------------------------|---------------------------------------------------------------------------|
| Real-Time Monitoring and Evaluation of a Visual-Based Cervical Cancer Screening Program Using a Decision Support Job Aid, Peterson et al 2016 |     | Yes |  |  |  | Yes |  |  | 1. Information, 3. Quality                                              | H. Electronic medical record , Q. Knowledge management system             |
| The Millennium Villages Project (MVP), mobile Health tool, Mushamiri et al; 2015                                                              |     | Yes |  |  |  | Yes |  |  | 1. Information, 5. Utilization                                          | D. Client communications system                                           |
| Afya data, Karumuribo et al; 2017                                                                                                             |     | Yes |  |  |  | Yes |  |  | 1. Information, 6. Efficiency                                           | V. Public Health and disease surveillance system                          |
| Connected Diagnostics, van Duijn; 2021                                                                                                        |     | Yes |  |  |  | Yes |  |  | 2. Availability,3. Quality 6. Efficiency                                | R. Laboratory and diagnostics information system                          |
| Empower Health software, Otieno et al;2020                                                                                                    |     | Yes |  |  |  | Yes |  |  | 2. Availability, 3. Quality, 6. Efficiency                              | Y. Telemedicine D. Client communications system                           |
| i-PUSH, Abajobir et al; 2021                                                                                                                  | Yes |     |  |  |  | Yes |  |  | 7.Cost                                                                  | C. Client application, M. Health finance and insurance information system |
| Inuka Coaching, Doukani et al 2021                                                                                                            |     | Yes |  |  |  | Yes |  |  | 2. Availability                                                         | Q. Knowledge management system                                            |
| PANDA (pregnancy and newborn diagnosis assessment) system, Garcia Vilaplana et al;2020                                                        |     | Yes |  |  |  | Yes |  |  | 1. Information, 2. Availability, 5. Utilization, 6. Efficiency, 7. Cost | H. Electronic medical record                                              |
| The Mobile Maternal Health Wallet (MMHW), Lacroze et al; 2021                                                                                 | Yes |     |  |  |  | Yes |  |  | 7. Cost                                                                 | M. Health finance and insurance information system                        |
| Smartphone Use for Cervical Cancer Screening in Low-Resource Countries, Catarino et al; 2015                                                  |     | Yes |  |  |  | Yes |  |  | 3. Quality                                                              | R. Laboratory and diagnostics information system                          |

|                                                                                                                                            |     |     |  |  |  |     |     |  |                                                                           |                                                                         |
|--------------------------------------------------------------------------------------------------------------------------------------------|-----|-----|--|--|--|-----|-----|--|---------------------------------------------------------------------------|-------------------------------------------------------------------------|
| A Smartphone-Based Approach for Triage of Human Papillomavirus, Urner et al; 2017                                                          |     | Yes |  |  |  | Yes |     |  | 2. Availability                                                           | R. Laboratory and diagnostics information system                        |
| Smartphone digital images for the detection of cervical intraepithelial neoplasia of grade 2 or worse (CIN2+), Ricard-Gauthier et al; 2015 |     | Yes |  |  |  | Yes |     |  | 2. Availability                                                           | R. Laboratory and diagnostics information system                        |
| NeoTree digital capture and quality improvement system Mgusha et al 2021                                                                   |     | Yes |  |  |  | Yes |     |  | 1. Information, 3. Quality , 6. Efficiency                                | H. Electronic medical record                                            |
| StAR2D, Farmer et al 2021                                                                                                                  |     | Yes |  |  |  | Yes |     |  | 1. Information, 5. Utilization                                            | D. Client communications system                                         |
| Computer-assisted digital chest X-ray technology, Twabi et al;2021                                                                         |     | Yes |  |  |  |     | Yes |  | 2. Availability, 3. Quality, 7. Cost                                      | R. Laboratory and diagnostics information system                        |
| Mobile Phone Text Message Reminders, Steinhardt et al; 2018                                                                                |     | Yes |  |  |  | Yes |     |  | 1.Information                                                             | Q. Knowledge management system                                          |
| Accurate Real-Time Diagnosis of Lymphoproliferative Disorders in Malawi Through Clinicopathologic Teleconferences, Montgomery et al; 2016  |     | Yes |  |  |  | Yes |     |  | 2. Availability                                                           | R. Laboratory and diagnostics information system, Y. Telemedicine       |
| Tablet-Based Cervical Cancer Educational Intervention, Caster et al; 2017                                                                  | Yes |     |  |  |  | Yes |     |  | 1. Information                                                            | C. Client application                                                   |
| Wellvis COVID triage tool, Owoyemi et al;2021                                                                                              | Yes |     |  |  |  |     | Yes |  | 1. Information, 2. Availability,6. Efficiency, 7.Cost , 8. Accountability | C. Client application, V. Public health and disease surveillance system |

|                                                                                                                                      |     |     |     |  |  |     |  |                                                                |                                                                          |
|--------------------------------------------------------------------------------------------------------------------------------------|-----|-----|-----|--|--|-----|--|----------------------------------------------------------------|--------------------------------------------------------------------------|
| EXTEND evaluation, Ebenso et al 2018                                                                                                 |     | Yes |     |  |  | Yes |  | 1. Information, 2. Availability                                | N. Health management information system, S. Learning and training system |
| Remote Teaching of Histopathology, Rotimi et al; 2017                                                                                |     | Yes |     |  |  | Yes |  | 2. Availability, 3. Quality                                    | S. Learning and training system                                          |
| Mobile phone short message service, Omole et al; 2018                                                                                |     | Yes |     |  |  | Yes |  | 1. Information, 5. Utilization                                 | D. Client communications system                                          |
| Neural Transfer Learning for Cry-based Diagnosis of Perinatal Asphyxia, Onu et al; 2019                                              |     | Yes |     |  |  | Yes |  | 3. Quality                                                     | R. Laboratory and diagnostics information system                         |
| PEERNaija, Ahonkhai et al; 2021                                                                                                      | Yes |     |     |  |  | Yes |  | 1. Information, 5. Utilization                                 | C. Client application                                                    |
| Mobile digital quiz game for the promotion of malaria awareness, Chikwuocha et al; 2020                                              |     | Yes | Yes |  |  | Yes |  | 1. Information, 2. Availability                                | C. Client application                                                    |
| Clinical decision support algorithm, Center for Primary Care and Public Health (Unisante), University of Lausanne, Switzerland, 2022 |     | Yes |     |  |  | Yes |  | 3. Quality                                                     | Q. Knowledge management system                                           |
| RapidSMS-MCH, Ngabo et al; 2012                                                                                                      |     | Yes |     |  |  | Yes |  | 1. Information, 2. Availability, 5. Utilization, 6. Efficiency | D. Client communications system, I. Emergency response system            |
| Telepathology Triage, Mpunga et al; 2016                                                                                             |     | Yes |     |  |  | Yes |  | 2. Availability                                                | R. Laboratory and diagnostics information system                         |
| Smartphone Application for Detecting Skin Cancers, Rubagumya et al; 2020                                                             |     | Yes |     |  |  | Yes |  | 2. Availability                                                | R. Laboratory and diagnostics information system                         |



|                                                                                                                                                                                                                                                                                                                                        |     |     |     |  |  |     |     |  |                                             |                                                                                           |
|----------------------------------------------------------------------------------------------------------------------------------------------------------------------------------------------------------------------------------------------------------------------------------------------------------------------------------------|-----|-----|-----|--|--|-----|-----|--|---------------------------------------------|-------------------------------------------------------------------------------------------|
| Uber for Blood, McVeigh, K. 2018. "Uber for Blood': How rwandan Delivery robots Are Saving lives." The Guardian                                                                                                                                                                                                                        |     | Yes |     |  |  | Yes |     |  | 2. Availability, 6. Efficiency              | T. Logistics management information system                                                |
| Aviro Health App, <a href="https://borgenproject.org/aviro-health-in-south-africa/">https://borgenproject.org/aviro-health-in-south-africa/</a>                                                                                                                                                                                        | Yes | Yes |     |  |  |     | Yes |  | 1. Information, 2. Availability, 3. Quality | C. Client application, S. Learning and training system, Y. Telemedicine                   |
| Tele-reading, Griggs et al ;2014                                                                                                                                                                                                                                                                                                       |     | Yes |     |  |  | Yes |     |  | 2. Availability , 7. Cost                   | Y. Telemedicine                                                                           |
| TBDx, Applied Visual Systems, Inc, Swati et al;2016                                                                                                                                                                                                                                                                                    |     | Yes |     |  |  | Yes |     |  | 2. Availability, 3. Quality, 7. Cost        | R. Laboratory and diagnostics information system                                          |
| Mobile Health (mHealth) technologies for epilepsy, Davies et al 2021                                                                                                                                                                                                                                                                   |     | Yes |     |  |  | Yes |     |  | 2. Availability, 7. Cost                    | Y. Telemedicine                                                                           |
| d-CXR, Moodley et al 2021                                                                                                                                                                                                                                                                                                              |     | Yes |     |  |  | Yes |     |  | 2. Availability, 6. Efficiency, 7. Cost     | S. Learning and training system                                                           |
| momConnect, Pillay and Motsoaledi,2018                                                                                                                                                                                                                                                                                                 |     | Yes |     |  |  |     | Yes |  | 1. Information, 5. Utilization              | S. Learning and training system                                                           |
| StAR2D, Farmer et al 2021                                                                                                                                                                                                                                                                                                              |     | Yes |     |  |  | Yes |     |  | 1. Information, 5. Utilization              | S. Learning and training system                                                           |
| The Philani MOVIE, Adam et al 2021                                                                                                                                                                                                                                                                                                     |     | Yes |     |  |  | Yes |     |  | 1. Information                              | S. Learning and training system                                                           |
| Home-based intervention to test and start (HITS), Mathenjwa et al 2019                                                                                                                                                                                                                                                                 | Yes |     |     |  |  | Yes |     |  | 5. Utilization                              | C. Client application , Q. Knowledge management system                                    |
| ProLife Moriarty et al; 2019                                                                                                                                                                                                                                                                                                           |     | Yes |     |  |  | Yes |     |  | 1. Information, 5. Utilization              | D. Client communications system                                                           |
| Mobile tracking of those with coronavirus, <a href="https://www.reuters.com/article/health-coronavirus-telkom-sa/s-africa-launches-mobile-tracking-of-those-with-coronavirus-idUSL8N2BQ61L">https://www.reuters.com/article/health-coronavirus-telkom-sa/s-africa-launches-mobile-tracking-of-those-with-coronavirus-idUSL8N2BQ61L</a> |     |     | Yes |  |  |     | Yes |  | 1. Information                              | N. Health management information system, V. Public health and disease surveillance system |

|                                                                                                                                      |     |     |  |  |  |     |     |  |                                            |                                                  |
|--------------------------------------------------------------------------------------------------------------------------------------|-----|-----|--|--|--|-----|-----|--|--------------------------------------------|--------------------------------------------------|
| Electronic booking system, Booyse et al; 2020                                                                                        |     | Yes |  |  |  | Yes |     |  | 1. Information, 6. Efficiency              | H. Electronic medical records                    |
| The Kilimanjaro Method, Yeates et al; 2016                                                                                           |     | Yes |  |  |  | Yes |     |  | 3. Quality                                 | S. Learning and training system                  |
| The CAD4TB software is a computer-aided detection system                                                                             |     | Yes |  |  |  | Yes |     |  | 2. Availability, 3. Quality, 6. Efficiency | R. Laboratory and diagnostics information system |
| Mobile phone Communication, Lund et al; 2012                                                                                         |     | Yes |  |  |  | Yes |     |  | 1. Information , 5. Utilization            | D. Client communications system                  |
| InfoSpots, Holst et al; 2021                                                                                                         | Yes |     |  |  |  | Yes |     |  | 1. Information                             | C. Client application                            |
| Clinical decision support algorithm, Center for Primary Care and Public Health (Unisante), University of Lausanne, Switzerland, 2022 |     | Yes |  |  |  | Yes |     |  | 3. Quality                                 | Q. Knowledge management system                   |
| SMS text messaging app, Siedner et al; 2015                                                                                          |     | Yes |  |  |  | Yes |     |  | 1. Information, 5. Utilization             | R. Laboratory and diagnostics information system |
| Low-cost ruggedized Android tablets to augment in-service training of community health worker Stiles et al;2021                      |     | Yes |  |  |  | Yes |     |  | 2. Availability, 3. Quality                | Q. Knowledge management system                   |
| Mobile Phone Consultations, Ayiasi et al 2016                                                                                        |     | Yes |  |  |  | Yes |     |  | 1. Information, 5. Utilization , 7. Cost   | Y. Telemedicine                                  |
| mTrac UNICEF Uganda, 2011                                                                                                            |     | Yes |  |  |  |     | Yes |  | 1. Information, 2. Availability,           | T. Logistics management information system       |
| mHealth application to strengthening pharmaceutical systems, Namisango et al; 2016                                                   |     | Yes |  |  |  | Yes |     |  | 1. Information, 6. Efficiency              | U. Pharmacy information system                   |

|                                                                                     |     |     |     |  |  |     |  |  |                                                             |                                                        |
|-------------------------------------------------------------------------------------|-----|-----|-----|--|--|-----|--|--|-------------------------------------------------------------|--------------------------------------------------------|
| Novel Mobile Phone Application to Improve Palliative Home-Care, Harding et al; 2021 | Yes | Yes |     |  |  | Yes |  |  | 2. Availability, 5. Utilization                             | C. Client application                                  |
| Smartphone strategies for cervical cancer screening, Asgary et al;2020              |     | Yes |     |  |  | Yes |  |  | 2. Availability, 3. Quality                                 | S. Learning and training system, Y. Telemedicine       |
| Retinopathy AI screening, Bellemo et.al 2019                                        |     | Yes |     |  |  | Yes |  |  | 2. Availability, 3. Quality,                                | R. Laboratory and diagnostics information system       |
| HealthTrax, Hong et al; 2015                                                        |     |     | Yes |  |  | Yes |  |  | 1. Information, 5. Utilization                              | L. Geographic information system                       |
| Automatic software (CAD4TB 5) in chest X-ray (CXR), Melendez et al; 2017            |     | Yes |     |  |  | Yes |  |  | 2. Availability, 3. Quality, 6. Efficiency                  | R. Laboratory and diagnostics information system       |
| Interactive digital tablet-based counselling, Thomas et al;2019                     | Yes |     |     |  |  | Yes |  |  | 1. Information, 2. Availability, 3. Quality, 5. Utilization | C. Client application , Q. Knowledge management system |
| Novel Mobile Phone Application to Improve Palliative Home-Care, Harding et al; 2021 | Yes | Yes |     |  |  | Yes |  |  | 2. Availability, 5. Utilization                             | C. Client application                                  |

Table S4: Supplementary material: Digital Health Interventions used to strengthen health workforce in sub-Saharan Africa

| Name/Reference/<br>Pointt of contact                                                           | Target -User |           |          |                  | Stage of development |       |             |         | Addressed<br>Health System<br>Challenge | Aligned Systems Category                                            |
|------------------------------------------------------------------------------------------------|--------------|-----------|----------|------------------|----------------------|-------|-------------|---------|-----------------------------------------|---------------------------------------------------------------------|
|                                                                                                | Clients      | Providers | Managers | Data<br>Services | Informal             | Pilot | Established | Unknown |                                         |                                                                     |
| Kassai Anya Fedorova,<br>Anya.Fedorova@psiangola.org                                           |              | Yes       |          |                  |                      |       | Yes         |         | 1. Information, 3. Quality              | S. Learning and training system                                     |
| The Safe Delivery App in Benin Lauren Bellhouse,<br>lauren@maternity.dk                        |              | Yes       |          |                  |                      |       | Yes         |         | 2. Avalability, 3. Quality              | S. Learning and training system,<br>Q. Knowledge management system, |
| OppiaMobile Alex Little,<br>consult@alexlittle.net                                             |              | Yes       |          |                  |                      | Yes   |             |         | 3. Quality                              | S. Learning and training system                                     |
| OPAC (Koha software open public access cataloge) Federal Ministry of Health,<br>dha@moh.gov.et |              | Yes       |          |                  |                      |       | Yes         |         | 1. Information                          | P. Identification registries and directories                        |
| National residency matching Federal Ministry of Health,<br>dha@moh.gov.et                      |              | Yes       |          |                  |                      |       | Yes         |         | 2. Availability, 3. Quality             | S. Leaning and training systems                                     |
| mHealth Federal Ministry of Health,<br>dha@moh.gov.et                                          |              | Yes       |          |                  |                      |       | Yes         |         | 1. Information, 3. Quality              | S. Learning and training system                                     |
| HRIS Licensing Federal Ministry of Health,<br>dha@moh.gov.et                                   |              |           | Yes      |                  |                      |       | Yes         |         | 2. Availability                         | O. Human resources information system                               |
| Green Stone Digital library Federal Ministry of Health,<br>dha@moh.gov.et                      |              | Yes       |          |                  |                      |       | Yes         |         | 1. Information                          | Q. Knowledge management system                                      |
| DSS - Self Assement Tool Federal Ministry of Health,<br>dha@moh.gov.et                         |              | Yes       |          |                  |                      |       | Yes         |         | 1. Information                          | W. Research information system                                      |

|                                                                                                            |  |     |     |  |  |     |     |     |                                                   |                                                                             |
|------------------------------------------------------------------------------------------------------------|--|-----|-----|--|--|-----|-----|-----|---------------------------------------------------|-----------------------------------------------------------------------------|
| Hello Nurse Darlene Irby,<br>Darlene.Irby@jhpiego.org                                                      |  | Yes |     |  |  | Yes |     |     | 3. Quality                                        | S. Learning and training system                                             |
| The Safe Delivery App in<br>Ghana Lauren Bellhouse,<br>lauren@maternity.dk                                 |  | Yes |     |  |  |     | Yes |     | 2. Availability, 3.<br>Quality                    | Q. Knowledge management<br>system, S. Learning and training<br>system       |
| eSIP-Saude Devan Manharlal,<br>devan.manharlal@jhpiego.org                                                 |  |     | Yes |  |  | Yes |     |     | 1. Information,6.<br>Efficiency                   | O. Human resource information<br>system                                     |
| SIFIn Júlio Tualufo,<br>julio.tualufo@jhpiego.org                                                          |  |     | Yes |  |  |     | Yes |     | 1. Information,3.<br>Quality, 6.<br>Efficiency    | O. Human resource information<br>system, S. Learning and training<br>system |
| Shugabanci Agbons Oaiya,<br>bonkhi@gmail.com                                                               |  |     | Yes |  |  | Yes |     |     | 2. Availability, 3.<br>Quality                    | O. Human resource information<br>system                                     |
| NaijaCare Project Moshood<br>Abdullateef,<br>moshood@everylmobile.com                                      |  | Yes |     |  |  | Yes |     |     | 2. Availability,3.<br>Quality                     | S. Learning and training system                                             |
| HelpMum Dr Abiodun<br>Adereni,<br>abbey2real@gmail.com                                                     |  | Yes |     |  |  |     | Yes |     | 1. Information, 2.<br>Availability, 3.<br>Quality | Q. Knowledge management<br>system S. Learning and training<br>system        |
| Mobile Training and Support<br>(MOTS) Frederick F. Kamara<br>(World Vision-SL),<br>Fredrick_kamara@wvi.org |  | Yes |     |  |  |     |     | Yes | 2. Availability, 3.<br>Quality,                   | S. Learning and training system                                             |
| The Safe Delivery App in<br>Sierra Leone Lauren<br>Bellhouse,<br>lauren@maternity.dk                       |  | Yes |     |  |  |     | Yes |     | 2. Availability, 3.<br>Quality                    | S. Learning and training system                                             |
| MOTS COVID-19 Monica<br>Amponsah,<br>mamponsah@grameenfoundat<br>ion.org                                   |  | Yes |     |  |  |     |     | Yes | 2. Availability, 3.<br>Quality                    | S. Learning and training system                                             |

|                                                                                                                                             |  |     |     |  |     |     |     |     |                                            |                                                                     |
|---------------------------------------------------------------------------------------------------------------------------------------------|--|-----|-----|--|-----|-----|-----|-----|--------------------------------------------|---------------------------------------------------------------------|
| Improving health worker adherence to IPTp provision guidelines through sending text messages Christian Rassi, c.rassi@malariaconsortium.org |  | Yes |     |  |     | Yes |     |     | 3. Quality                                 | S. Learning and training system                                     |
| Duty Roster and Attendance Tracking Mobile Application Dennis Kibiye, kibsden@gmail.com                                                     |  |     | Yes |  |     |     | Yes |     | 1. Information, 2. Availability            | O. Human resources information system                               |
| integrated Human Resource Information System (iHRIS) Ismail Wadembere, iwadembere@intrahealth.org                                           |  |     | Yes |  |     |     |     | Yes | 3. Quality                                 | O. Human resource information system                                |
| Rheumatic Heart Disease and Hypertension Tracking Stefanie Kot, skot@d-tree.org                                                             |  | Yes |     |  |     |     |     | Yes | 2. Availability, 5. Utilization            | H. Electronic medical record, O. Human resources information system |
| Access to information databases and tools                                                                                                   |  | Yes |     |  | Yes |     |     |     | 1.Information, 3.Quality                   | S. Learning and training system                                     |
| mLearning                                                                                                                                   |  | Yes |     |  |     |     |     | Yes | 2. Availability, 3. Quality                | S. Learning and training system                                     |
| Access to information databases and tools                                                                                                   |  | Yes |     |  |     |     | Yes |     | 1. Information, 3. Quality                 | Q. Knowledge management system, S. Learning and training system     |
| e-Learning platform                                                                                                                         |  | Yes |     |  |     |     |     | Yes | 2. Availability, 3. Quality                | S. Learning and training system                                     |
| Access to information databases and tools                                                                                                   |  | Yes |     |  |     |     | Yes |     | 1. Information, 3. Quality                 | Q. Knowledge management system, S. Learning and training system     |
| m-Learning                                                                                                                                  |  | Yes |     |  |     |     | Yes |     | 2. Availability, 3. Quality                | S. Learning and training system                                     |
| Access to information databases and tools                                                                                                   |  | Yes |     |  |     |     | Yes |     | 1. Information,2. Availability, 3. Quality | Q. Knowledge management system, S. Learning and training system     |
| mLearning                                                                                                                                   |  | Yes |     |  | Yes |     |     |     | 2. Availability, 3. Quality                | S. Learning and training system                                     |

|                                           |  |     |  |  |     |     |     |     |                                             |                                                                 |
|-------------------------------------------|--|-----|--|--|-----|-----|-----|-----|---------------------------------------------|-----------------------------------------------------------------|
| Access to information databases and tools |  | Yes |  |  |     |     | Yes |     | 1. Information, 2. Availability, 3. Quality | Q. Knowledge management system, S. Learning and training system |
| mLearning                                 |  | Yes |  |  | Yes |     |     |     | 2. Availability, 3. Quality                 | S. Learning and training system                                 |
| e-Learning platform                       |  | Yes |  |  |     |     |     |     | 2 Availability, 3. Quality                  | S. Learning and training system                                 |
| Access to information databases and tools |  | Yes |  |  |     | Yes |     |     | 1. Information, 2. Availability, 3. Quality | Q. Knowledge management system, S. Learning and training system |
| m-Learning                                |  | Yes |  |  |     |     | Yes |     | 2. Availability, 3. Quality                 | S. Learning and training system                                 |
| e-Learning platform                       |  | Yes |  |  |     |     |     | Yes | 2. Availabilty, 3. Quality                  | S. Learning and training system                                 |
| e-Learning platform                       |  | Yes |  |  |     |     |     | Yes | 2. Availability, 3. Quality                 | S. Learning and training system                                 |
| Access to information databases and tools |  | Yes |  |  |     |     | Yes |     | 1. Information, 2. Availability, 3. Quality | Q. Knowledge management system, S. Learning and training system |
| m-Learning                                |  | Yes |  |  |     | Yes | Yes |     | 2. Availability, 3. Quality                 | S. Learning and training system                                 |
| e-Learning platform                       |  | Yes |  |  |     | Yes |     |     | 2. Availability, 3. Quality                 | S. Learning and training system                                 |
| m-Learning                                |  | Yes |  |  |     | Yes |     |     | 2. Availability, 3. Quality                 | S. Learning and training system                                 |
| Decision support system                   |  | Yes |  |  |     | Yes |     |     | 3. Quality                                  | Q. Knowledge management system                                  |
| e-Learning platform                       |  | Yes |  |  |     |     |     | Yes | 2 Availability, 3. Quality                  | S. Learning and training system                                 |
| Access to information databases and tools |  | Yes |  |  | Yes |     |     |     | 1. Information, 3. Quality                  | Q. Knowledge management system, S. learning and training system |
| m-Learning                                |  | Yes |  |  | Yes |     |     |     | 3. Quality                                  | S. Learning and training system                                 |
| e-Learning platform                       |  | Yes |  |  |     |     |     | Yes | 2. Availability, 3. Quality                 | S. Learning and training system                                 |
| Access to information databases and tools |  | Yes |  |  |     | Yes | Yes |     | 1. Information, 2. Availability, 3. Quality | Q. Knowledge management system, S. learning and training system |

|                                           |     |     |  |  |     |     |     |     |                                             |                                                                 |
|-------------------------------------------|-----|-----|--|--|-----|-----|-----|-----|---------------------------------------------|-----------------------------------------------------------------|
| m-Learning                                |     | Yes |  |  |     | Yes | Yes |     | 2. Availability, 3. Quality                 | S. Learning and training system                                 |
| e-Learning platform                       |     | Yes |  |  |     |     |     | Yes | 2. Availability, 3. Quality                 | S. Learning and training system                                 |
| Access to information databases and tools |     | Yes |  |  |     | Yes | Yes |     | 1. Information,3. Quality                   | Q. Knowledge management system, S. learning and training system |
| e-Learning platform                       |     | Yes |  |  |     |     |     | Yes | 2. Availability, 3. Quality                 | S. Learning and training system                                 |
| Access to information databases and tools | Yes | Yes |  |  | Yes |     |     |     | 1. Information, 2. Availability, 3. Quality | Q. Knowledge management system, S. learning and training system |
| m-Learning                                |     | Yes |  |  |     |     | Yes |     | 2. Availability, 3. Quality                 | S. Learning and training system                                 |
| e-Learning platform                       |     | Yes |  |  |     |     | Yes |     | 3. Quality                                  | S. Learning and training system                                 |
| Access to information databases and tools |     | Yes |  |  |     |     | Yes |     | 1. Information,2. Availability, 3. Quality  | Q. Knowledge management system, S. learning and training system |
| e-Learning platform                       |     | Yes |  |  |     |     |     | Yes | 2. Availability, 3. Quality                 | S. Learning and training system                                 |
| Access to information databases and tools |     | Yes |  |  |     | Yes | Yes |     | 1. Information, 2. Availability,3. Quality  | Q. Knowledge management system, S.Learning and training system  |
| m-Learning                                |     | Yes |  |  |     |     | Yes |     | 2. Availability                             | S. Learning and training system                                 |
| Access to information databases and tools |     | Yes |  |  |     | Yes |     |     | 1. Information, 2. Availability, 3. Quality | Q. Knowledge management system, S.Learning and training system  |
| e-Learning platform                       |     | Yes |  |  |     |     |     | Yes | 2. Availability, 3. Quality                 | S. Learning and training system                                 |
| e-Learning platform                       |     | Yes |  |  |     |     |     | Yes | 2. Availability, 3. Quality                 | S. Learning and training system                                 |
| Access to information databases and tools |     | Yes |  |  |     |     | Yes |     | 1. Information, 2. Availability,3. Quality  | Q. Knowledge management system, S. Learning and training system |
| e-Learning platform                       |     | Yes |  |  |     |     |     | Yes | 2. Availability, 3. Quality                 | S. Learning and training system                                 |
| m-Learning                                |     | Yes |  |  |     |     |     | Yes | 2. Availability, 3. Quality                 | S. Learning and training system                                 |



|                                                                                                                  |     |     |  |  |     |     |     |     |                                             |                                                                          |
|------------------------------------------------------------------------------------------------------------------|-----|-----|--|--|-----|-----|-----|-----|---------------------------------------------|--------------------------------------------------------------------------|
| e-Learning platform                                                                                              |     | Yes |  |  |     |     |     | Yes | 2. Availability, 3. Quality                 | S. Learning and training system                                          |
| Access to information databases and tools                                                                        | Yes | Yes |  |  |     |     |     | Yes | 1. Information, 2. Availability, 3. Quality | Q. Knowledge management system, S. Learning and training system          |
| mLearning                                                                                                        |     | Yes |  |  | Yes |     |     |     | 2. Availability, 3. Quality                 | S. Learning and training system                                          |
| m-health applications in Botswana: telemedicine and education, Littman-Quinn et al; 2013                         |     | Yes |  |  |     | Yes | Yes |     | 2. Availability, 3. Quality                 | S. Learning and training system, Y. Telemedicine                         |
| mHealth to Train Community Health Nurses, Asgary et al; 2016                                                     |     | Yes |  |  |     | Yes |     |     | 2. Availability, 3. Quality                 | S. Learning and training system                                          |
| EXTEND evaluation, Ebenso et al 2018                                                                             |     | Yes |  |  |     |     |     | Yes | 1. Information, 2. Availability             | N. Health management information system, S. Learning and training system |
| Remote Teaching of Histopathology, Rotimi et al; 2017                                                            |     | Yes |  |  |     | Yes | Yes |     | 2. Availability, 3. Quality                 | S. Learning and training system                                          |
| The Kilimanjaro Method, Yeates et al; 2016                                                                       |     | Yes |  |  |     | Yes | Yes |     | 3. Quality                                  | S. Learning and training system                                          |
| Low-cost ruggedized Android tablets to augment in-service training of community health worker Stiles et al; 2021 |     | Yes |  |  |     | Yes | Yes |     | 2. Availability, 3. Quality                 | Q. Knowledge management system                                           |
| Smartphone strategies for cervical cancer screening, Asgary et al; 2020                                          | Yes |     |  |  |     | Yes | Yes |     | 2. Availability, 3. Quality                 | S. Learning and training system, Y. Telemedicine                         |

Table S5: Supplementary material: Digital Health Interventions used to strengthen Health Information System in sub-Saharan Africa

| Name/Reference/Point of contact                                            | Target - User |           |         |               | Stage of development |       |             |         | Addressed Health System Challenge                                 | Aligned Systems Category                                                                                          |
|----------------------------------------------------------------------------|---------------|-----------|---------|---------------|----------------------|-------|-------------|---------|-------------------------------------------------------------------|-------------------------------------------------------------------------------------------------------------------|
|                                                                            | Clients       | Providers | Manages | Data Services | Informal             | Pilot | Established | Unknown |                                                                   |                                                                                                                   |
| IRS - Cunene Sergio Lopes, sergio@mentor-initiative.net                    |               |           | Yes     |               |                      | Yes   |             |         | 1. information, 3. Quality, 5. Utilization                        | F. Community -based information system, V. Public health and disease surveillance, W. Research information system |
| NTD LF TAS and Coverage Surveys Clara Burgert, cburgert@rti.org            |               |           | Yes     |               |                      |       |             | Yes     | 1. Information                                                    | W. Research Information System                                                                                    |
| OpenLMIS Benin (SIIL) Rebecca Alban, info@openlmis.org                     |               | Yes       | Yes     |               |                      |       | Yes         |         | 1. Information, 2. Availability, 6. Efficiency, 8. Accountability | T. Logistics management and information system (LMIS)                                                             |
| DHIS2 for COVID-19 Surveillance: Botswana Rebecca Potter, covid@dhis2.org  |               |           | Yes     |               |                      |       | Yes         |         | 1. Information                                                    | V. Public Health and disease Surveillance System                                                                  |
| Integrated e-Diagnostic Approach Thierry Agagliate, tag@tdh.ch             |               | Yes       |         |               |                      |       | Yes         |         | 1. Information, 3. Quality                                        | N. Health management information system, Q. Knowledge Management System,                                          |
| One Health Platform Romain Tohouri, romain_tohouri@jsi.com                 |               |           |         | Yes           |                      |       | Yes         |         | 1. Information                                                    | N. Health management information system                                                                           |
| DHIS2 for COVID-19 Surveillance: Burkina Faso Boukary, ouedbouks@gmail.com |               |           | Yes     |               |                      |       | Yes         |         | 1. Information                                                    | V. Public health and disease surveillance                                                                         |

|                                                                                                                        |  |     |     |  |  |     |     |     |                                                             |                                                                                                   |
|------------------------------------------------------------------------------------------------------------------------|--|-----|-----|--|--|-----|-----|-----|-------------------------------------------------------------|---------------------------------------------------------------------------------------------------|
| Bio-fortified Value Chains for Improved Maternal and Child Nutrition (B4MCN) Bertin Nduwayo,<br>bertin_nduwayo@wvi.org |  | Yes |     |  |  | Yes |     |     | 1. Information, 2. Availability, 3. Quality, 6. Efficiency, | ,F. Community-based Information System,V. Public health and disease surveillance, Y. Telemedicine |
| DHIS2 for COVID-19 Surveillance: Cabo Verde Rebecca Potter,<br>covid@dhis2.org                                         |  |     | Yes |  |  |     | Yes |     | 1. Information                                              | V. Public health and disease surveillance system                                                  |
| DHIS2 for COVID-19 Surveillance: Cameroun (in development) Rebecca Potter,<br>covid@dhis2.org                          |  |     | Yes |  |  |     | Yes |     | 1. Information                                              | V. Public health and disease surveillance                                                         |
| Suivi de de la vaccination des enfants de moisn d'un an Sessouma Abdoulaye,<br>sesabdnaz@yahoo.fr                      |  |     | Yes |  |  |     |     | Yes | 1. Information                                              | N. Health Managemen Information System                                                            |
| mHealth with ESPEN Collect REBOLLO POLO Maria,<br>rebolopolom@who.int                                                  |  |     | Yes |  |  |     |     | Yes | 1. Information                                              | A.Census, population information & data warehouse, W. Research Information System                 |
| DHIS2 for COVID-19 Surveillance: Congo DRC (in development) Rebecca Potter,<br>covid@dhis2.org                         |  |     | Yes |  |  |     | Yes |     | 1. Information                                              | V. Public health and disease surveillance                                                         |
| COVID-19 Vaccine Allocation App Anubhuti Mishra,<br>anubhuti.mishra@thepalladiumgroup.com                              |  |     | Yes |  |  |     | Yes |     | 1. Information, 2. Availability, 6. Efficiency,             | F. Community-based Information System                                                             |
| DHIS2 for COVID-19 Surveillance: Djibouti Rebecca Potter,<br>covid@dhis2.org                                           |  |     | Yes |  |  |     | Yes |     | 1. Information                                              | V. Public health and disease surveillance                                                         |

|                                                                                       |  |     |     |  |  |     |     |  |                                           |                                                                                               |
|---------------------------------------------------------------------------------------|--|-----|-----|--|--|-----|-----|--|-------------------------------------------|-----------------------------------------------------------------------------------------------|
| Hiwot: Addressing Maternal & Neonatal Health Stefanie Kot, skot@d-tree.org            |  | Yes |     |  |  | Yes |     |  | 1. information, 3. Quality, 6. Efficiency | F. Community-based Information System,Q. Knowledge Management,S. Learning and training system |
| VERS Federal Ministry of Health, dha@moh.gov.et                                       |  |     | Yes |  |  |     | Yes |  | 1. Information,                           | B. Civil Registration and Vital Statistics                                                    |
| Tena PIMS Federal Ministry of Health, dha@moh.gov.et                                  |  | Yes |     |  |  |     | Yes |  | 1. Information, 6. Efficiency,            | H. Electronic medical record                                                                  |
| SmartEMS (Samrt Electronic Medical System) Federal Ministry of Health, dha@moh.gov.et |  | Yes | Yes |  |  |     | Yes |  | 1. Information, 6. Efficiency             | H. Electronic medical record                                                                  |
| RI (routine immunization dashboard) Federal Ministry of Health, dha@moh.gov.et        |  |     | Yes |  |  |     | Yes |  | 1. Information                            | N. Health management information system                                                       |
| PRS (Patient Registration System) Federal Ministry of Health, dha@moh.gov.et          |  | Yes |     |  |  |     | Yes |  | 1. Information, 6. Efficiency             | H. Electronic medical record                                                                  |
| PrimeCare electronic health record Federal Ministry of Health, dha@moh.gov.et         |  | Yes |     |  |  |     | Yes |  | 1. Information, 6. Efficiency             | H. Electronic medical record                                                                  |
| Patient Registration Software Federal Ministry of Health, dha@moh.gov.et              |  | Yes |     |  |  |     | Yes |  | 1. Information, 6. Efficiency             | H. Electronic medical record                                                                  |
| Open Clinic Federal Ministry of Health, dha@moh.gov.et                                |  | Yes |     |  |  |     | Yes |  | 1. Information, 6. Efficiency             | H. Electronic medical record, K. Facility management system                                   |
| NHDD Federal Ministry of Health, dha@moh.gov.et                                       |  |     | Yes |  |  |     | Yes |  | 1. Information                            | N. Health Management information system                                                       |
| MRIS Federal Ministry of Health, dha@moh.gov.et                                       |  |     | Yes |  |  |     | Yes |  | 1. Information                            | F. Community-based Information System                                                         |

|                                                                                                             |  |     |     |  |  |  |     |  |                                           |                                                                                     |
|-------------------------------------------------------------------------------------------------------------|--|-----|-----|--|--|--|-----|--|-------------------------------------------|-------------------------------------------------------------------------------------|
| HMIS Brisk Federal Ministry of Health, dha@moh.gov.et                                                       |  | Yes | Yes |  |  |  | Yes |  | 1. Information, 6. Efficiency             | H. Electronic medical record                                                        |
| eMRIS (Electronic Multi Sectoral Response Information System) Federal Ministry of Health, dha@moh.gov.et    |  |     | Yes |  |  |  | Yes |  | 1. Information                            | N. Health management information system                                             |
| eHMIS - Regions except SNNP Region Federal Ministry of Health, dha@moh.gov.et                               |  |     | Yes |  |  |  | Yes |  | 1. Information,                           | B. Civil Registration and Vital Statistics, N. Health management information system |
| eCHIS - Old Federal Ministry of Health, dha@moh.gov.et                                                      |  | Yes |     |  |  |  | Yes |  | 1. Information                            | F. Community-based Information System                                               |
| eCHIS - New Federal Ministry of Health, dha@moh.gov.et                                                      |  | Yes |     |  |  |  | Yes |  | 1. information, 3. Quality, 6. Efficiency | F. Community based information system, Q. Knowledge management system,              |
| DSS (demographic surveillance system) Federal Ministry of Health, dha@moh.gov.et                            |  |     | Yes |  |  |  | Yes |  | 1. Information                            | B. Civil registration and vital statistics                                          |
| DHMS (Digital Hospital Management System) Federal Ministry of Health, dha@moh.gov.et                        |  | Yes | Yes |  |  |  | Yes |  | 1. Information, 6. Efficiency             | K. Facility management information system                                           |
| District Health Information System (DHIS2) Federal Ministry of Health, dha@moh.gov.et                       |  |     | Yes |  |  |  | Yes |  | 1. Information                            | N. Health management information system                                             |
| DATIM (Data for Accountability Transparency & Impact Monitoring) Federal Ministry of Health, dha@moh.gov.et |  |     | Yes |  |  |  | Yes |  | 1. Information                            | N. Health management information system                                             |
| AGHMC EMR Federal Ministry of Health, dha@moh.gov.et                                                        |  | Yes |     |  |  |  | Yes |  | 1. Information, 6. Efficiency             | H. Electronic Medical Record                                                        |

|                                                                                                           |  |     |     |     |     |     |     |                                                                |                                                                                          |
|-----------------------------------------------------------------------------------------------------------|--|-----|-----|-----|-----|-----|-----|----------------------------------------------------------------|------------------------------------------------------------------------------------------|
| Ethiopia Health Data Analytics Platform (EHDAP) Dawit Kassa, dawit@zenysis.com                            |  |     | Yes |     |     | Yes |     | 1. Information, 6. Efficiency,                                 | G. Data interchange inteoperability and accessibiity                                     |
| DHIS2 for COVID-19 Surveillance: Ethiopia Rebecca Potter, covid@dhis2.org                                 |  |     | Yes |     |     | Yes |     | 1. Information                                                 | V. Public health and disease surveillance                                                |
| Life-saving Mobile Health Kits (LMHK) for Obstetric Care in Remote Areas Belay Haffa, belay_haffa@wvi.org |  | Yes |     |     | Yes |     |     | 1. Information, 2. Availability, 5. Utilization, 6. Efficiency | F. Community-based Information System, Q. Knowledge Management Y. Telemedicine           |
| Real-time COVID-19 case monitoring for the MoH Gambia Aleksa Krolls, aleksa@openfn.org                    |  |     | Yes |     | Yes |     |     | 1. Information, 6. Efficiency                                  | V. Public health and disease surveillance                                                |
| DHIS2 for COVID-19 Surveillance: Gambia Rebecca Potter, covid@dhis2.org                                   |  |     | Yes |     |     | Yes |     | 1. Information                                                 | V. Public health and disease surveillance                                                |
| MEDTRACK Omar Seidu Farouk, omar@medtrack.com.gh                                                          |  | Yes |     |     | Yes |     |     | 1. Information, 6. Efficiency                                  | H. Electronic health record, X. Shared Health record and health information repositories |
| Global Health Security Agenda Pia MacDonald, pmacdonald@rti.org                                           |  |     | Yes |     |     |     | Yes | 1. Information,                                                | V. Public health and disease surveillance                                                |
| Global Open Facility Registry (GOFR) Eileen Reynolds, ereynolds@rti.org                                   |  |     |     | Yes |     | Yes |     | 1. Information, 6. Efficiency                                  | G. Data interchange, interoperability, and accessibility                                 |
| Guinea EVD contact Tracing Anne Lui, Aboubacar DIALLO, Mamady Camara, adiallo84x@gmail.com                |  |     | Yes |     |     |     | Yes | 1. Information                                                 | F. Community-based Information System,,V. Public health and disease surveillance         |

|                                                                                                           |  |     |     |  |  |     |     |  |                                                  |                                                                                          |
|-----------------------------------------------------------------------------------------------------------|--|-----|-----|--|--|-----|-----|--|--------------------------------------------------|------------------------------------------------------------------------------------------|
| DHIS2 for COVID-19 Surveillance: Guinea<br>Rebecca Potter, covid@dhis2.org                                |  |     | Yes |  |  |     | Yes |  | 1. Information                                   | V. Public health and disease surveillance                                                |
| DHIS2 for COVID-19 Surveillance: Guinea Bissau<br>Rebecca Potter, covid@dhis2.org                         |  |     | Yes |  |  |     | Yes |  | 1. Information                                   | V. Public health and disease surveillance                                                |
| Hoji Mobile Data Collection and Analysis Platform<br>Gitahi Ng'ang'a, gitahi@hoji.co.ke                   |  |     | Yes |  |  |     | Yes |  | 1. Information                                   | W. Research Information System                                                           |
| Regional Action Through Data (RAD)<br>Laurie Markle, LMarkle@brhc.com                                     |  | Yes |     |  |  | Yes |     |  | 1. Information, 5. Utilization, Efficiency       | H. Electronic health record, X. Shared Health record and health information repositories |
| M-Sawazisha: Integrating Mobile Technology in MNCH in Afya Jijini<br>Michael Korir, korir@medicmobile.org |  | Yes |     |  |  | Yes |     |  | 1. Information, 2. Availability, 5. Utilization, | B. Civil Registration and Vital Statistics, F. Community-based Information System,       |
| Bethany Kids Kijabe Hospital<br>Steven Wanyee, swanyee@intellisoftkenya.com                               |  | Yes | Yes |  |  |     | Yes |  | 1. Information, 6. Efficiency                    | H. Electronic medical record                                                             |
| COVID-19 SMS Data Collaboration Initiative<br>Boris Maguire, boris@echomobile.org                         |  |     | Yes |  |  |     | Yes |  | 1. Information                                   | F. Community-based information system                                                    |
| DHIS2 for COVID-19 Surveillance: Kenya<br>Rebecca Potter, covid@dhis2.org                                 |  |     | Yes |  |  |     | Yes |  | 1. Information                                   | V. Public health and disease surveillance                                                |
| KenyaEMR<br>Pascal Mwele, Pascal.Mwele@thepalladiumgroup.com                                              |  |     | Yes |  |  |     | Yes |  | 1. Information, 6. Efficiency                    | H. Electronic medical record                                                             |

|                                                                                 |  |     |     |  |  |     |     |                               |                                                                                    |
|---------------------------------------------------------------------------------|--|-----|-----|--|--|-----|-----|-------------------------------|------------------------------------------------------------------------------------|
| National Data Warehouse (NDWH) Pascal Mwele, pascal.mwele@thepalladiumgroup.com |  |     | Yes |  |  | Yes |     | 1. Information, 6. Efficiency | G. Data interchange, interoperability, and accessibility                           |
| Interoperability Layer Pascal Mwele, pascal.mwele@thepalladiumgroup.com         |  |     | Yes |  |  | Yes |     | 1. Information, 6. Efficiency | G. Data interchange interoperability and accessibility                             |
| DWAPI Pascal Mwele, pascal.mwele@thepalladiumgroup.com                          |  |     | Yes |  |  | Yes |     | 1. Information, 6. Efficiency | G. Data interchange interoperability and accessibility                             |
| Afya Mobile Pascal Mwele, pascal.mwele@thepalladiumgroup.com                    |  | Yes |     |  |  | Yes |     | 1. Information                | F. Community-based information system                                              |
| m-Jali Caroline Mbindyo, caroline.mbindyo@mref.org                              |  |     | Yes |  |  | Yes |     | 1. Information                | F. Community-based Information System, N. Health management information system     |
| PaperEMR Pratap Kumar, pratap@health-e-net.org                                  |  | Yes |     |  |  | Yes |     | 1. Information, 6. Efficiency | H. Electronic Medical Record                                                       |
| DHIS2 MoH Data Warehouse Tsele Moloeli, moloelit@yahoo.com                      |  |     | Yes |  |  | Yes |     | 1. Information                | N. Health information management information system                                |
| Lesotho eRegister Monaheng Maoeng, monaheng.maoeng@gov.ls                       |  | Yes |     |  |  |     | Yes | 1. Information, 6. Efficiency | H. Electronic medical record, X. Shared Record and health information repositories |
| HIV and Health Situation Rooms Masebo Koto, kotomasebo@gmail.com                |  |     | Yes |  |  |     | Yes | 1. Information                | N. Health management information system                                            |



|                                                                                                                |  |     |     |     |  |     |     |                                   |                                                                                                                  |
|----------------------------------------------------------------------------------------------------------------|--|-----|-----|-----|--|-----|-----|-----------------------------------|------------------------------------------------------------------------------------------------------------------|
| CITIZEN APP Pule Phafane,<br>pule@smartmycompany.com                                                           |  |     | Yes |     |  |     | Yes | 1. Information,                   | I. Emergency response system , V. Public health and disease surveillance system , W. Research information system |
| DHIS2-Covid -19 surveillance<br>-Lesotho Monaheng Maoeng,<br>monaheng.maoeng@gov.ls                            |  |     | Yes |     |  |     | Yes | 1. Information,                   | V. Public health and disease surveillance system                                                                 |
| Bophelo-Ka-Mosebeletsi<br>(Village Healthcare Workers)<br>Application Teboho Khoali,<br>teboho.khoali@undp.org |  | Yes |     |     |  | Yes |     | 1. Information,                   | F. Community-based information system                                                                            |
| EADEL - EGPAF Analytics<br>Data Engine Lesotho Sele<br>Mthimkhulu,<br>smthimkhulu@pedaids.org                  |  | Yes | Yes |     |  |     | Yes | 1. Information,                   | N. Health management information system                                                                          |
| mHero in Liberia Intrahealth<br>International,<br>digitalhealth@intrahealth.org                                |  | Yes | Yes |     |  |     | Yes | 1. Information                    | I. Emergency response system, V. Public health and disease surveillance system                                   |
| Liberia Health Analytics<br>Platform (LHAP) Claire<br>Cravero, claire@zenysis.com                              |  |     |     | Yes |  |     | Yes | 1. Information, 6. Efficiency     | G, Data interchange interoperability and accessibility                                                           |
| USAID ACCESS m-health<br>initiative Stephanie Ranaivo,<br>sranaivo@usaidaccess.org                             |  | Yes |     |     |  |     | Yes | 1. Information, 3. Quality        | F. Community-based Information System,N. Health Management Information System                                    |
| Covid-19 DHIS 2 Rebecca<br>Potter, covid@dhis2.org                                                             |  |     | Yes |     |  |     | Yes | 1. Information                    | V. Public health and disease surveillance                                                                        |
| UBALE (MIRA STUDY)<br>Dane Fredenburg,<br>dane.fredenburg@crs.org                                              |  |     | Yes |     |  | Yes |     | 1. Information, 8. Accountability | W. Research Information System                                                                                   |

|                                                                                                                           |  |     |     |  |  |     |     |  |                               |                                                                                 |
|---------------------------------------------------------------------------------------------------------------------------|--|-----|-----|--|--|-----|-----|--|-------------------------------|---------------------------------------------------------------------------------|
| Medic at St Gabriel's Hospital Alex Ngalande, unknown@yahoo.com                                                           |  | Yes |     |  |  | Yes |     |  | 1, Information                | B. Civil Registration and Vital Statistics                                      |
| ONSE - Integrated Supportive Supervision Toolkit Rudi Thetard - ONSE Chief of Party, rthetard@msh.org                     |  |     | Yes |  |  | Yes |     |  | 1. Information, 3. Quality    | N. Health management information system                                         |
| ARGUS Joseph Wu, wcsg@lukeinternational.no                                                                                |  |     | Yes |  |  | Yes |     |  | 1. Information,               | V. Public health and disease surveillance                                       |
| Malawi electronic integrated disease surveillance and response system (Malawi eIDSR) Joseph Wu, wcsg@lukeinternational.no |  | Yes | Yes |  |  |     | Yes |  | 1. Information, 6. Efficiency | H. Electronic medical records, V. Public health and disease surveillance system |
| One Community Steve Choko, stevec@jhuccpmw.org                                                                            |  | Yes |     |  |  | Yes |     |  | 1. Information                | F. Community based information system                                           |
| eIDSR Case Based Surveillance App Malawi Soyapi Mumba, soyapim@gmail.com                                                  |  | Yes | Yes |  |  |     | Yes |  | 1. Information                | V. Public health and disease surveillance system                                |
| Barr Foundation iCCM mHealth project Erica Layer, elayer@d-tree.org                                                       |  |     | Yes |  |  | Yes |     |  | 1. Information                | F. Community based health informatin system, Q. Knowledge management system     |
| Medic Mobile DIY Malawi Jacqueline Edwards, jacqueline@medicmobile.org                                                    |  | Yes |     |  |  |     | Yes |  | 1. Information, 6. Efficiency | H. Electronic medical record                                                    |
| Malawi German Health Programme (MGHP) Simon Ndira, simon.ndira@giz.de                                                     |  | Yes | Yes |  |  | Yes |     |  | 1. Information                | N. health management information system                                         |
| DHIS2 for COVID-19 Surveillance: Malawi Rebecca Potter, covid@dhis2.org                                                   |  |     | Yes |  |  |     | Yes |  | 1. Information                | V. Public health and disease surveillance                                       |

|                                                                                                          |  |     |     |  |  |     |     |  |                                                             |                                                                                           |
|----------------------------------------------------------------------------------------------------------|--|-----|-----|--|--|-----|-----|--|-------------------------------------------------------------|-------------------------------------------------------------------------------------------|
| Post disaster IDSR Strengthening in 14 targeted districts of Malawi Joseph Wu, wmsg@lukeinternational.no |  |     | Yes |  |  |     | Yes |  | 1. Information                                              | V.Public health and disease surveillance system                                           |
| Electronic Participant Locator (ePAL) Luke Banda, lsbanda@mlw.mw                                         |  |     | Yes |  |  | Yes |     |  | 1. Information                                              | I. Emergency response system, V.Public health and disease surveillance system             |
| BIOWINPHARMA Mamadou Dakouo, contact@biowinpharma.com                                                    |  | Yes |     |  |  |     | Yes |  | 1. Information, 6. Efficiency                               | H. Electronic Medical Record, X. Shared Health Record and health information repositories |
| DHIS2 for COVID-19 Surveillance: Mali Rebecca Potter, covid@dhis2.org                                    |  |     | Yes |  |  |     | Yes |  | 1. Information                                              | V. Public health and disease surveillance                                                 |
| Access to Infant and Maternal (AIM) Health Plus Mauritania Zeine Abidine Ba, zeine_abidine@wvi.org       |  | Yes |     |  |  | Yes |     |  | 1. Information 2. Availability, 3. Quality, 5. Utilization  | F. Community - based information system, Q. Knowledge Management system                   |
| upSCALE Joaquim Rebelo, j.rebelo@malariaconsortium.org                                                   |  | Yes |     |  |  |     | Yes |  | 1. Information, 2. Availability, 3. Quality, 5. Utilization | F. Community -based information system, Q. Knowledge management system                    |
| mAlert Safa Naraghi, safa@zenysis.com                                                                    |  |     | Yes |  |  |     | Yes |  | 1. Information, 6. Efficiency                               | I. Emergency response system, V.Public health and disease surveillance system             |
| DHIS2 for COVID-19 Surveillance: Mozambique Rebecca Potter, covid@dhis2.org                              |  |     | Yes |  |  |     | Yes |  | 1. Information                                              | V. Public health and disease surveillance                                                 |
| Community Scorecard App_Mozambique Robert Worthington, rob@kwantu.net                                    |  | Yes |     |  |  | Yes |     |  | 1. Information 8. Accountability                            | F. Community-based Information System                                                     |

|                                                                                                                              |  |     |     |     |     |  |     |                                 |                                                                        |
|------------------------------------------------------------------------------------------------------------------------------|--|-----|-----|-----|-----|--|-----|---------------------------------|------------------------------------------------------------------------|
| Namibia Planned Parenthood Association (NAPPA) Erin Sullivan,<br>erin.sullivan@jhpigo.org                                    |  | Yes |     |     |     |  | Yes | 1. Information, 6. Efficiency   | H. Electronic medical record                                           |
| DHIS2 for COVID-19 Surveillance: Niger (in development) Rebecca Potter,<br>covid@dhis2.org                                   |  |     | Yes |     |     |  | Yes | 1. Information                  | V. Public health and disease surveillance                              |
| Act to Save (A2S) Ezéchiel Mahamane,<br>ezechiel_mahamane@wvi.org                                                            |  | Yes |     |     | Yes |  |     | 1. Information, 2. Availability | F. Community-based Information System, Q. Knowledge management system  |
| USAID funded - CaTSS OpenMRS Electronic Medical Record System for 19 ART Clinics Benjamin Akinmoyeje,<br>bakinmoyeje@msh.org |  | Yes | Yes |     |     |  | Yes | 1. Information, 6. Efficiency   | H. Electronic medical record                                           |
| DHIS2 for COVID-19 Surveillance: Nigeria (in development) Rebecca Potter,<br>covid@dhis2.org                                 |  |     | Yes |     |     |  | Yes | 1. Information                  | V. Public health and disease surveillance                              |
| SwissTPH x OpenFn: Automated, real-time data integration & disease monitoring Aleksa Krolls,<br>aleksa@openfn.org            |  | Yes | Yes |     |     |  | Yes | 1. Information, 6. Efficiency   | H. Electronic medical record, N. health management information system, |
| EmHealth-Paediatric Digital Health Initiative Dr Agbarakwe Chukwuemeka,<br>brammy@emhealthglobal.org                         |  | Yes |     |     |     |  | Yes | 1. Information, 6. Efficiency   | H. Electronic medical record                                           |
| Rwanda Health Analytics Platform (RHAP) Eliachim Ishimwe,<br>eliachim@zenysis.com                                            |  |     |     | Yes |     |  | Yes | 1. Information, 6. Efficiency,  | G. Data interchange interoperability and accessibility                 |

|                                                                                                                     |  |     |     |     |  |  |     |     |                               |                                                        |
|---------------------------------------------------------------------------------------------------------------------|--|-----|-----|-----|--|--|-----|-----|-------------------------------|--------------------------------------------------------|
| DHIS2 for COVID-19 Surveillance: Rwanda Rebecca Potter, covid@dhis2.org                                             |  |     | Yes |     |  |  | Yes |     | 1. Information                | V. Public health and disease surveillance              |
| Rwanda Health Information Exchange System (RHIES) Julie Vanvolsem, julie@savics.org                                 |  |     |     | Yes |  |  | Yes |     | 1. Information, 6. Efficiency | G. Data interchange interoperability and accessibility |
| DHIS2 for COVID-19 Surveillance: Sao Tome and Principe (in development) Rebecca Potter, covid@dhis2.org             |  |     | Yes |     |  |  |     | Yes | 1. Information                | V. Public health and disease surveillance              |
| NTD SCH-STH prevalence survey Clara Burgert, cburgert@rti.org                                                       |  |     | Yes |     |  |  |     | Yes | 1. Information                | W. Research information                                |
| DHIS2 for COVID-19 Surveillance: Senegal Rebecca Potter, covid@dhis2.org                                            |  |     | Yes |     |  |  | Yes |     | 1. Information                | V. Public health and disease surveillance              |
| electronic Integrated Disease Surveillance and Response (eIDSR) Nelson Clemens, nelson.clemens@sl.ehealthafrica.org |  |     | Yes |     |  |  | Yes |     | 1. Information                | V. Public health and disease surveillance              |
| CHAMPS DAYO SPENCER-WALTERS, dayo.spencer-walters@sl.ehealthafrica.org                                              |  | Yes |     |     |  |  |     | Yes | 1. Information                | B. Civil Registration and Vital Statistics             |
| VaxTrac Dayo Spencer-Walters, dayo.spencer-walters@sl.ehealthafrica.org                                             |  | Yes |     |     |  |  |     | Yes | 1. Information, 6. Efficiency | H. Electronic medical record                           |
| AVADAR: Auto-Visual AFP Detection and Reporting Faye Simmonds, faye.simmonds@sl.ehealthafrica.org                   |  |     | Yes |     |  |  |     | Yes | 1. Information                | V. Public health and disease surveillance              |

|                                                                                                                                        |  |     |     |     |  |     |     |     |                                               |                                                                |
|----------------------------------------------------------------------------------------------------------------------------------------|--|-----|-----|-----|--|-----|-----|-----|-----------------------------------------------|----------------------------------------------------------------|
| 117 Alerts System Dayo Spencer-Walters, dayo.spencer-walters@sl.ehealthafrica.org                                                      |  | Yes | Yes |     |  |     |     | Yes | 1. Information                                | V. Public health and disease surveillance                      |
| Electronic Vaccination Record and Tracking System Implementation Project (VaxTrac) Musa Bernard Komeh, musa.komeh@sl.ehealthafrica.org |  | Yes |     |     |  |     |     | Yes | 1. Information, 6. Efficiency                 | H. Electronic medical record, Q. Knowledge management system   |
| Saving Lives Mohammad B. Jalloh, mbjalloh@focus1000.org                                                                                |  | Yes |     |     |  |     |     | Yes | 1. Information, 5. Utilization, 6. Efficiency | H. Electronic medical records                                  |
| RapidPro Kazutaka Sekine, ksekine@unicef.org                                                                                           |  | Yes | Yes |     |  |     | Yes |     | 1. Information,                               | N. Health management information system                        |
| Access to Infant and Maternal (AIM) Health Plus Sierra Leone Joseph Musa, joseph_musa@wvi.org                                          |  | Yes |     |     |  | Yes |     |     | 1. Information, 2. Availability,              | F. Community-based Information System, Q. Knowledge Management |
| Global Open Facility Registry (GOFR) Reconciliation Tool Telli Koroma, tellikoroma@gmail.com                                           |  |     |     | Yes |  |     |     | Yes | 1. Information                                | G. Data interchange interoperability and accessibility         |
| DHIS2 for COVID-19 Surveillance: Sierra Leone Rebecca Potter, covid@dhis2.org                                                          |  |     | Yes |     |  |     | Yes |     | 1. Informaiton                                | V. Public health and disease surveillance                      |
| Instant OpenHIE Daniel Futerman, daniel.futerman@jembi.org                                                                             |  |     | Yes |     |  |     |     | Yes | 1. Information,                               | N. Health information management information system            |
| OpenHIM (Open Health Information Mediator) Daniel Futerman, daniel.futerman@jembi.org                                                  |  |     |     | Yes |  |     |     | Yes | 1. Information,                               | G. Data interchange interoperability and accessibility         |
| NACOSA Health Analytics Platform (NHAP) Safa Naraghi, safanaraghi@zenysis.com                                                          |  |     | Yes |     |  |     | Yes | Yes | 1. Information,                               | N. Health management information system                        |

|                                                                                                                                                           |  |     |     |     |  |     |     |  |                                                                |                                                                                                       |
|-----------------------------------------------------------------------------------------------------------------------------------------------------------|--|-----|-----|-----|--|-----|-----|--|----------------------------------------------------------------|-------------------------------------------------------------------------------------------------------|
| BroadReach COVID-19 Pandemic Management Fiona de Korte, fdekorte@brhc.com                                                                                 |  | Yes | Yes |     |  |     | Yes |  | 1. Information, 2. Availability, 5. Utilization, 6. Efficiency | N. Health management information system, V. Public health and disease surveillance system             |
| DHIS2 for COVID-19 Surveillance: South Africa Rebecca Potter, covid@dhis2.org                                                                             |  |     | Yes |     |  |     | Yes |  | 1. Information                                                 | V. Public health and disease surveillance                                                             |
| HIV Solution powered by Vantage Todd Malone, Todd.Malone@brhc.com                                                                                         |  |     | Yes |     |  |     | Yes |  | 1. Information                                                 | N. Health information management information system, V. Public health and disease surveillance system |
| COVID 19 - Safe Entry Management Kent Perils, kent@bcpi.co.za                                                                                             |  |     | Yes |     |  |     | Yes |  | 1. Information                                                 | V. Public health and disease surveillance                                                             |
| eLQAS: Collecting real-time polio vaccination data Yaw Anokwa, yanokwa@nafundi.com                                                                        |  | Yes |     |     |  |     | Yes |  | 1. Information                                                 | N. Health management information system                                                               |
| Improving Healthcare Capacity and Access Using THINKMD's Clinical Decision Support Tool in a Humanitarian Setting Meg McLaughlin, mmclaughlin@thinkmd.org |  | Yes |     |     |  | Yes |     |  | 1. Information, 6. Efficiency                                  | H. Electronic medical record                                                                          |
| NEMO Andrew Nute, andrew.nute@cartercenter.org                                                                                                            |  |     | Yes |     |  |     | Yes |  | 1. Information                                                 | W. Research Information System                                                                        |
| DHIS2 for COVID-19 Surveillance: Sudan (in development) Rebecca Potter, covid@dhis2.org                                                                   |  |     | Yes |     |  |     | Yes |  | 1. Information                                                 | V. Public health and disease surveillance                                                             |
| Togo Health Analytics Platform (THAP) Quentin Perrot, quentin@zenysis.com                                                                                 |  |     |     | Yes |  |     | Yes |  | 1. Information, 6. Efficiency,                                 | G. Data interchange interoperability and accessibility                                                |

|                                                                                          |  |     |     |  |  |     |     |  |                                               |                                                                                                           |
|------------------------------------------------------------------------------------------|--|-----|-----|--|--|-----|-----|--|-----------------------------------------------|-----------------------------------------------------------------------------------------------------------|
| mTrac Sean Blaschke, sblaschke@unicef.org                                                |  |     | Yes |  |  |     | Yes |  | 1. Information,                               | N. Health information management system, V. Public health and disease surveillance system                 |
| UgandaEMR (OpenMRS) Jonathan Mpango, jmpango@musph.ac.ug                                 |  | Yes |     |  |  |     | Yes |  | 1. Information , 6. Efficiency                | H. Electronic medical record                                                                              |
| STRE@MLINE Mr Samuel Mugisha, CEO Innovation Streams Ltd, samuel@innovationstreams.tech  |  | Yes |     |  |  | Yes |     |  | 1. Information, 6. Efficiency,                | K. Facility management information system                                                                 |
| SmartHealth App in Uganda Nii Amon Dsane, ndsane@livinggoods.org                         |  | Yes |     |  |  |     | Yes |  | 1. Information, 2. Availability, 3. Quality   | F. Community -based information system,Q. Knowledge Management,T. Logistics management information system |
| Bringing Back Mothers and Babies Kisaakye Linda, lkisaakye@gmail.com                     |  | Yes |     |  |  |     | Yes |  | 1. Information, 5. utilization, 6. Efficiency | H. Electronic medical record                                                                              |
| DREAMS/OVC Juliet Cheptoris, julietcheptoris@gmail.com                                   |  | Yes | Yes |  |  |     | Yes |  | 1. Information, 6. Efficiency,                | H. Electronic medical record, N. Health management information system,                                    |
| Early Infant Diagnosis(EID) Dashboard Dr. Victor Bigira, vbigira@musph.ac.ug             |  | Yes | Yes |  |  |     | Yes |  | 1. Information, 6. Efficiency,                | H. Electronic medical record                                                                              |
| Option B+ Kisaakye Linda, lkisaakye@gmail.com                                            |  | Yes |     |  |  |     | Yes |  | 1. Information, 5. Utilization                | N. Health management information system                                                                   |
| Smart Hospital Information System (SmarHIS) Dr Simon Ndira, simon.ndira@compelling.works |  | Yes |     |  |  | Yes |     |  | 1. Information, 6. Efficiency                 | K. Facility management information system                                                                 |



|                                                                                                  |  |     |     |  |  |     |     |     |                                               |                                                                                                              |
|--------------------------------------------------------------------------------------------------|--|-----|-----|--|--|-----|-----|-----|-----------------------------------------------|--------------------------------------------------------------------------------------------------------------|
| Performance Tracking App for CHW Supervisors Simon Mutama, smutama@livinggoods.org               |  | Yes | Yes |  |  |     |     | Yes | 1. Information, 3. Quality,                   | F. Community-based information system, O. Human resources information system, Q. Knowledge management system |
| Strategic Information Mobile Application Jonathan Mpango, vbigira@musph.ac.ug                    |  | Yes | Yes |  |  |     |     | Yes | 1. Information                                | N. Health information management system,                                                                     |
| Viral Load Dashboard Dr. Victor Bigira, vbigira@musph.ac.ug                                      |  |     | Yes |  |  |     | Yes |     | 1. Information                                | N. Health management information system                                                                      |
| FamilyConnect Dr. Jesca Nsungwa Sabiiti, jnsabiiti@gmail.com                                     |  | Yes |     |  |  |     |     | Yes | 1. Information                                | B. Civil Registration and Vital Statistics, F. Community-based information system,                           |
| NTD LF pre-TAS and TAS survey Clara Burgert, cburgert@rti.org                                    |  |     | Yes |  |  |     |     | Yes | 1. Information                                | W. Research Information System                                                                               |
| Stre@mline Samuel Mugisha, samuel@streamlinehealth.org                                           |  | Yes |     |  |  |     |     | Yes | 1. Information, 5. Utilization, 6. Efficiency | H. Electronic medical record, D. Client communication system                                                 |
| Open Client Registry Wayan Vota, wvota@intrahealth.org                                           |  | Yes |     |  |  |     |     | Yes | 1. Information, 6. Efficiency                 | H. Electronic medical record, X. SHR and health information repositories                                     |
| DHIS2 for COVID-19 Surveillance: Uganda Rebecca Potter, covid@dhis2.org                          |  | Yes | Yes |  |  |     | Yes |     | 1. Information                                | V. Public health and disease surveillance                                                                    |
| Buikwe Maternal Newborn and Child Health (B-MNCH) Project Angella Akolla, angella_akolla@wvi.org |  | Yes |     |  |  | Yes |     |     | 1. Information, 8. Accountability             | Q. Knowledge management system                                                                               |
| Public Health Open Community Mapping Kiggudde Deogratius, deogratias@mapuganda.org               |  | Yes |     |  |  | Yes |     |     | 1. Information                                | F. Community-based Information System, L. Geographic Information system                                      |

|                                                                                                                                                                                  |  |     |     |  |     |     |     |                                                                |                                                                                             |
|----------------------------------------------------------------------------------------------------------------------------------------------------------------------------------|--|-----|-----|--|-----|-----|-----|----------------------------------------------------------------|---------------------------------------------------------------------------------------------|
| Health Information Mediator Ssanyu Nyinondi, ssanyu_nyinondi@jsi.com                                                                                                             |  |     | Yes |  |     | Yes |     | 1. Information, 6. Efficiency                                  | G. Data interchange interoperability and accessibility                                      |
| Community Family Planning and Model Household Systems; Population Health Environment (PHE) Rebecca Litner, rlitner@d-tree.org                                                    |  | Yes |     |  |     |     | Yes | 1. Information, 5. Utilization, 8. Accountability              | F. Community based information system, Q. Knowledge management system                       |
| Sauti- HIV Prevention Program Gloria Kahamba, gkahamba@d-tree.org                                                                                                                |  | Yes |     |  |     |     | Yes | 1. Information, 5. Utilization, 6. Efficiency                  | H. Electronic medical record                                                                |
| Family Planning Digital Health System for Community Health Workers- Mara Region with Shirati KMT Hospital Gloria Kahamba, gkahamba@d-tree.org                                    |  | Yes |     |  |     |     | Yes | 1. Information                                                 | F. Community-based health system                                                            |
| BID INITIATIVE Hassan Mtenga, Laurie Warner, hmtenga@path.org                                                                                                                    |  | Yes |     |  |     |     | Yes | 1. Information, 5. Utilization, 6. Efficiency                  | H. Electronic medical record                                                                |
| USAID BORESHA AFYA - COMMUNITY HEALTH INFORMATION SYSTEM ENCOMPASSING OPEN SMART REGISTER PLATFORM, CLOSED USER GROUP & ELEARNING Dunstan Bishanga, Dunstan.Bishanga@jhpiego.org |  | Yes |     |  | Yes |     |     | 1. Information, 2. Availability, 5. Utilization, 6. Efficiency | H. Electronic medical record, I. Emergency response system, S. Learning and training system |
| SAUTI PROJECT-KVP MOBILE DATA COLLECTION SYSTEM Dr Albert Komba, Albert.Komba@jhpiego.org                                                                                        |  | Yes |     |  |     |     | Yes | 1. Information,                                                | F. Community-based health information system                                                |

|                                                                                                                               |  |     |     |  |     |  |     |                                                 |                                                                          |
|-------------------------------------------------------------------------------------------------------------------------------|--|-----|-----|--|-----|--|-----|-------------------------------------------------|--------------------------------------------------------------------------|
| Family Planning Digital Health System for Community Health Workers - Shinyanga Region Gloria Kahamba, gkahamba@d-tree.org     |  | Yes |     |  |     |  | Yes | 1. Information,                                 | F. Community-based Information System,                                   |
| Shang Ring Electronic Data Collection Alice Christensen, alice.christensen@jhpiego.org                                        |  | Yes |     |  |     |  | Yes | 1. Information                                  | W. Research Information System                                           |
| ARTIFICIAL INTELLIGENCE IN SOCIAL MEDIA DURING CORONA VIRUS DISEASE OUTBREAK. DEOGRATIAS MZURIKWAO, deogratias@xsenseai.co.tz |  |     | Yes |  |     |  | Yes | 1. Information                                  | W. Research Information System                                           |
| DHIS2 for COVID-19 Surveillance: Zanzibar (in development) Rebecca Potter, covid@dhis2.org                                    |  |     | Yes |  |     |  | Yes | 1. Information                                  | V. Public health and disease surveillance                                |
| Jamii ni Afya Heiko Hornung, hhornung@d-tree.org                                                                              |  | Yes |     |  |     |  | Yes | 1. Information                                  | F. Community-based information system, Q. Knowledge management system    |
| Access to Infant and Maternal (AIM) Health Plus Tanzania Daudi Sosthen Gambo, daudi_gambo@wvi.org                             |  | Yes |     |  | Yes |  |     | 1. Information, 2. Availability, 5. Utilization | F. Community-based information system, Q. Knowledge management system    |
| Hyperlocal Geospatial Data for Improving Vaccination Campaigns Asha Mustapher, omdtanzania@gmail.com                          |  |     | Yes |  |     |  | Yes | 1. Information                                  | F. Community-based information system, L. Geographic information system, |
| ZEIR - Zambia Electronic Immunization Registry Laurie Werner, lwerner@path.org                                                |  | Yes |     |  |     |  | Yes | 1. Information, 5. Utilization , 6. Efficiency  | H. Electronic medical record                                             |

|                                                                                                                                                         |  |     |     |     |  |     |     |     |                                |                                                                                     |
|---------------------------------------------------------------------------------------------------------------------------------------------------------|--|-----|-----|-----|--|-----|-----|-----|--------------------------------|-------------------------------------------------------------------------------------|
| Zambia health Analytics Platform (ZHAP) Kaluba Mataka, kaluba@zenysis.com                                                                               |  |     | Yes |     |  |     | Yes |     | 1. Information,                | N. Health management information system, T. Logistics management information system |
| Zambia National Data Warehouse Andrew Kashoka, andrew.kashoka@moh.gov.zm                                                                                |  |     |     | Yes |  |     | Yes |     | 1. Information, 6. Efficiency  | G. Data interchange interoperability and accessibility                              |
| DHIS2 for COVID-19 Surveillance: Zambia (in development) Rebecca Potter, covid@dhis2.org                                                                |  |     | Yes |     |  |     |     | Yes | 1. Information                 | V. Public health and disease surveillance                                           |
| IDeAS. Integrated Decisions and Analytics Support. Mandy Dube, MDube@brhc.com                                                                           |  | Yes |     |     |  |     | Yes |     | 1. Information, 6. Efficiency  | H. Electronic medical records                                                       |
| SmartCare Electronic Health Record System Andrew Kashoka, andrew.kashoka@moh.gov.zm                                                                     |  | Yes |     |     |  |     | Yes |     | 1. Information, 6. Efficiency  | H. Electronic medical record                                                        |
| Zambia Antenatal Care (ANC) Digital Adaption Project I Implementation Research Caren Chizuni, carenchizuni@gmail.com                                    |  | Yes |     |     |  | Yes |     |     | 1. Information , 3. Quality    | F. Community-based information system,Q. Knowledge Management                       |
| Implementation of a Performance-Based Financing Data System for Zimbabwe - using the open source tool Hesabu Benson Muzenda, Benson.Muzenda@cordaid.org |  |     | Yes |     |  |     | Yes |     | 1. Information, 3. Quality     | M. Health finance and insurance information system                                  |
| Impilo EHR Dr. Robert Gongora, rgongora536@gmail.com                                                                                                    |  | Yes |     |     |  |     | Yes |     | 1. Information, 6. Efficiency, | H. Electronic medical record                                                        |
| Health Surveys                                                                                                                                          |  |     | Yes |     |  | Yes |     |     | 1. Information                 | W. Research information system                                                      |
| Patient records                                                                                                                                         |  | Yes |     |     |  |     |     | Yes | 1. Information, 6. Efficiency, | H. Electronic medical record                                                        |

|                       |  |     |     |  |     |     |  |     |                               |                                                  |
|-----------------------|--|-----|-----|--|-----|-----|--|-----|-------------------------------|--------------------------------------------------|
| Diseaser Surveillance |  |     | Yes |  |     |     |  | Yes | 1. Information                | V. Public Health and disease suveillance system  |
| Health Surveys        |  |     | Yes |  |     |     |  | Yes | 1. Information                | W. Research information system                   |
| Diseaser Surveillance |  |     | Yes |  |     |     |  | Yes | 1. Information                | V. Public Health and disease suveillance system  |
| Patient records       |  |     | Yes |  |     |     |  | Yes | 1. Information, 6. Efficiency | H. Electronic medical record                     |
| Health Surveys        |  |     | Yes |  |     |     |  | Yes | 1. Information                | W. Research information system                   |
| Disease Surveillance  |  |     | Yes |  |     |     |  | Yes | 1. Information                | V. Public Health and disease suveillance system  |
| Disease Surveillance  |  |     | Yes |  |     |     |  | Yes | 1. Information                | V. Public Health and disease suveillance system  |
| Health Surveys        |  |     | Yes |  |     | Yes |  |     | 1. Information                | W. Research information system                   |
| Disease surveillance  |  |     | Yes |  |     | Yes |  |     | 1. Information                | V. Public Health and disease suveillance system  |
| Health survey         |  |     | Yes |  | Yes | Yes |  |     | 1. Information                | W. Research information system                   |
| Patient records       |  |     | Yes |  | Yes | Yes |  |     | 1. Information, 6. Efficiency | H. Electronic medical record                     |
| Health Survey         |  |     | Yes |  |     |     |  | Yes | 1. Information                | W. Research information system                   |
| Disease Surveillance  |  |     | Yes |  |     |     |  | Yes | 1. Information                | V. Public Health and disease suveillance system  |
| Patient records       |  | Yes |     |  |     | Yes |  |     | 1. Information, 6. Efficiency | H. Electronic medical record                     |
| Health survey         |  |     | Yes |  |     | Yes |  |     | 1. Information                | W. Research information system                   |
| Patient records       |  | Yes |     |  |     |     |  | Yes | 1. Information, 6. Efficiency | H. Electronic medical records                    |
| Health survey         |  |     | Yes |  |     |     |  | Yes | 1. Information                | W. Research information system                   |
| Disease Surveillance  |  |     | Yes |  | Yes |     |  |     | 1. Information                | V. Public health and disease surveillance system |
| Patient records       |  | Yes |     |  |     | Yes |  |     | 1. Information, 6. Efficiency | H. Electronic medical records                    |

|                      |  |     |     |  |  |     |     |     |                               |                                                  |
|----------------------|--|-----|-----|--|--|-----|-----|-----|-------------------------------|--------------------------------------------------|
| Health survey        |  |     | Yes |  |  |     | Yes |     | 1. Information                | W. Research information system                   |
| Disease surveillance |  |     | Yes |  |  | Yes |     |     | 1. Information                | V. Public health and disease surveillance system |
| Health survey        |  |     | Yes |  |  | Yes |     |     | 1. Information                | W. Research information system                   |
| Disease Surveillance |  |     | Yes |  |  | Yes |     |     | 1. Information                | V. Public health and disease surveillance system |
| Health survey        |  |     | Yes |  |  |     | Yes |     | 1. Information                | W. Research information system                   |
| Disease Surveillance |  |     | Yes |  |  |     | Yes |     | 1. Information                | V. Public health and disease surveillance system |
| Patient records      |  | Yes |     |  |  |     | Yes |     | 1. Information, 6. Efficiency | H. Electronic medical records                    |
| Disease Surveillance |  |     | Yes |  |  |     | Yes |     | 1. Information                | V. Public health and disease surveillance system |
| Patient records      |  | Yes |     |  |  | Yes | Yes |     | 1. Information, 6. Efficiency | H. Electronic medical records                    |
| Health survey        |  |     | Yes |  |  |     | Yes |     | 1. Information                | W. Research information system                   |
| Disease Surveillance |  |     | Yes |  |  | Yes | Yes |     | 1. Information                | V. Public health and disease surveillance system |
| Patient records      |  | Yes |     |  |  | Yes |     |     | 1. Information, 6. Efficiency | H. Electronic medical records                    |
| Health survey        |  |     | Yes |  |  |     | Yes |     | 1. Information                | W. Research information system                   |
| Disease Surveillance |  |     | Yes |  |  |     | Yes |     | 1. Information                | V. Public health and disease surveillance system |
| Health survey        |  |     | Yes |  |  |     | Yes |     | 1. Information                | W. Research information system                   |
| Patient records      |  | Yes |     |  |  |     | Yes |     | 1. Information, 6. Efficiency | H. Electronic medical records                    |
| Health survey        |  |     | Yes |  |  |     | Yes |     | 1. Information                | W. Research information system                   |
| Disease Surveillance |  |     | Yes |  |  |     | Yes |     | 1. Information                | V. Public health and disease surveillance system |
| Health survey        |  |     | Yes |  |  |     |     | Yes | 1. Information                | W. Research information system                   |

|                                                                                                                                                                               |  |     |     |  |  |  |     |     |                                                            |                                                                                           |
|-------------------------------------------------------------------------------------------------------------------------------------------------------------------------------|--|-----|-----|--|--|--|-----|-----|------------------------------------------------------------|-------------------------------------------------------------------------------------------|
| Disease Surveillance                                                                                                                                                          |  |     | Yes |  |  |  |     | Yes | 1. Information                                             | V. Public health and disease surveillance system                                          |
| Health survey                                                                                                                                                                 |  |     | Yes |  |  |  |     | Yes | 1. Information                                             | W. Research information system                                                            |
| Disease Surveillance                                                                                                                                                          |  |     | Yes |  |  |  |     | Yes | 1. Information                                             | V. Public health and disease surveillance system                                          |
| USAID Digital Health Activity (DHA), <a href="https://www.jsi.com/project/digital-health-activity/">https://www.jsi.com/project/digital-health-activity/</a>                  |  |     | Yes |  |  |  |     | Yes | 1. Information, 2. Availability, 3. Quality, 6. Efficiency | N. Health management information system, V. Public health and disease surveillance system |
| Cloud-based electronic data system, Jede et al;2020                                                                                                                           |  | Yes |     |  |  |  | Yes |     | 1. Information, 6. Efficiency                              | H. Electronic medical record                                                              |
| COVID-19 Tracker App, <a href="https://www.itu.int/hub/2020/05/ghana-launches-covid-19-tracker-app/">https://www.itu.int/hub/2020/05/ghana-launches-covid-19-tracker-app/</a> |  |     | Yes |  |  |  |     | Yes | 1. Information                                             | N. Health management information system, V. Public health and disease surveillance system |
| Real-Time Monitoring and Evaluation of a Visual-Based Cervical Cancer Screening Program Using a Decision Support Job Aid, Peterson et al 2016                                 |  | Yes |     |  |  |  | Yes |     | 1. Information, 3. Quality, 6. Efficiency                  | H. Electronic medical record , Q. Knowledge management system                             |
| Mobile research, Leidich et al; 2018                                                                                                                                          |  |     | Yes |  |  |  | Yes |     | 1. Information                                             | W. Research information system                                                            |
| The Health and Demographic Surveillance System (HDSS), Kaneko et al 2012                                                                                                      |  |     | Yes |  |  |  | Yes |     | 1. Information                                             | F. Community based information system                                                     |
| PANDA (pregnancy and newborn diagnosis assessment) system, Garcia Vilaplana et al;2020                                                                                        |  | Yes |     |  |  |  | Yes |     | 1. Information, 2. Availability, 5. Utilization, 7. Cost   | H. Electronic medical record                                                              |
| A Mobile Health Data Collection System, Quercia et al; 2018                                                                                                                   |  | Yes |     |  |  |  | Yes |     | 1. Information                                             | F. Community based information system                                                     |

|                                                                                                                                                                                                                                                                                                                                           |     |     |     |  |  |     |     |  |                                                                           |                                                                                           |
|-------------------------------------------------------------------------------------------------------------------------------------------------------------------------------------------------------------------------------------------------------------------------------------------------------------------------------------------|-----|-----|-----|--|--|-----|-----|--|---------------------------------------------------------------------------|-------------------------------------------------------------------------------------------|
| NeoTree digital capture and quality improvement system<br>Mgusha et al 2021                                                                                                                                                                                                                                                               |     | Yes |     |  |  | Yes |     |  | 1. Information, 3. Quality, 6. Efficiency                                 | H. Electronic medical record                                                              |
| Wellvis COVID triage tool,<br>Owoyemi et al;2021                                                                                                                                                                                                                                                                                          | Yes |     |     |  |  |     | Yes |  | 1. Information, 2. Availability,6. Efficiency, 7.Cost , 8. Accountability | C. Client application, V. Public health and disease surveillance system                   |
| Mobile tracking of those with coronavirus,<br><a href="https://www.reuters.com/article/health-coronavirus-telkom-sa/s-africa-launches-mobile-tracking-of-those-with-coronavirus-idUSL8N2BQ61L">https://www.reuters.com/article/health-coronavirus-telkom-sa/s-africa-launches-mobile-tracking-of-those-with-coronavirus-idUSL8N2BQ61L</a> |     |     | Yes |  |  |     | Yes |  | 1. Information                                                            | N. Health management information system, V. Public health and disease surveillance system |
| Electronic booking system,<br>Booyse et al; 2020                                                                                                                                                                                                                                                                                          |     | Yes |     |  |  | Yes |     |  | 1. Information                                                            | H. Electronic medical records                                                             |



Table S6: Supplementary material: Digital Health Interventions used to strengthen Access to Essential Medicines, Vaccines, and Technology in sub-Saharan Africa

| Name/Reference/<br>Point of contact                                                                                                    | Target-User |           |          |               | Stage of development |       |             |         | Addressed Health System Challenge                                 | Aligned Systems Category                              |
|----------------------------------------------------------------------------------------------------------------------------------------|-------------|-----------|----------|---------------|----------------------|-------|-------------|---------|-------------------------------------------------------------------|-------------------------------------------------------|
|                                                                                                                                        | Clients     | Providers | Managers | Data Services | Informal             | Pilot | Established | Unknown |                                                                   |                                                       |
| OpenLMIS Angola (SIGLOFA) Rebecca Alban, info@openlms.org                                                                              |             |           | Yes      |               |                      |       | Yes         |         | 1. Information, 2. Availability, 6. Efficiency, 8. Accountability | T. Logistics management information system (LMIS)     |
| Angola immunization supply chain Neeraj Thakare, neeraj@logistimo.com                                                                  |             |           | Yes      |               |                      |       | Yes         |         | 1. Information, 2. Availability, 6. Efficiency, 8. Accountability | T. Logistics management information system (LMIS)     |
| OpenLMIS Benin (SILL) Rebecca Alban, info@openlms.org                                                                                  |             | Yes       | Yes      |               |                      |       | Yes         |         | 1. Information, 2. Availability, 6. Efficiency, 8. Accountability | T. Logistics management and information system (LMIS) |
| The Prevention Pack Program: ensuring availability of post-rape medicines in rural clinics Jean Armas, jean.armas@globalstrategies.org |             | Yes       | Yes      |               |                      | Yes   |             |         | 2. Availability, 5. Utilization,                                  | I. Emergency response system                          |
| OpenLMIS Cote d'Ivoire (eSIGL) Rebecca Alban, info@openlms.org                                                                         |             | Yes       | Yes      |               |                      |       | Yes         |         | 1. Information, 2. Availability, 6. Efficiency, 8. Accountability | T. Logistics management information system (LMIS)     |
| Quntimed and Quntitb, Federal Ministry of Health, dha@moh.gov.et                                                                       |             |           | Yes      |               |                      |       | Yes         |         | 1. Information, 2. Availability, 6. Efficiency, 8. Accountability | T. Logistics management information system (LMIS)     |

|                                                                                               |     |     |     |  |  |     |     |     |                                                                   |                                                                                                      |
|-----------------------------------------------------------------------------------------------|-----|-----|-----|--|--|-----|-----|-----|-------------------------------------------------------------------|------------------------------------------------------------------------------------------------------|
| Pipeline Federal Ministry of Health, dha@moh.gov.et                                           |     |     | Yes |  |  |     | Yes |     | 1. Information, 2. Availability, 6. Efficiency, 8. Accountability | T. Logistics management information system (LMIS)                                                    |
| IVR (Interactive voice response) Federal Ministry of Health, dha@moh.gov.et                   |     | Yes |     |  |  |     | Yes |     | 1. Information, 2. Availability, 6. Efficiency, 8. Accountability | B. Civil registration and vital statistics, T. Logistics management information system               |
| EPS pharmaceutical information systems ( ARSMBDHS) Federal Ministry of Health, dha@moh.gov.et |     |     | Yes |  |  |     | Yes |     | 1. Information, 2. Availability, 6. Efficiency, 8. Accountability | T. Logistics management information system (LMIS)                                                    |
| ECHMIS (Electronic Communication HMIS) Federal Ministry of Health, dha@moh.gov.et             |     | Yes |     |  |  |     | Yes |     | 1. Information, 2. Availability, 6. Efficiency, 8. Accountability | T. Logistics management information system (LMIS)                                                    |
| Dagu Federal Ministry of Health, dha@moh.gov.et                                               |     | Yes |     |  |  |     | Yes |     | 1. Information, 2. Availability, 6. Efficiency, 8. Accountability | T. Logistics management information system (LMIS)                                                    |
| CCEIT Federal Ministry of Health, dha@moh.gov.et                                              |     |     | Yes |  |  |     | Yes |     | 1. Information, 2. Availability, 8. Accountability                | T. Logistics management information system (LMIS)                                                    |
| OpenLMIS Guinea Rebecca Alban, info@openlmis.org                                              |     |     | Yes |  |  |     | Yes |     | 1. Information, 2. Availability, 6. Efficiency                    | T. Logistics management information system (LMIS)                                                    |
| cStock/DHIS2 Zoya Mohammed, zoya_mohamed@insupplyhealth.com                                   |     |     | Yes |  |  | Yes |     |     | 1. Information, 2. Availability, 6. Efficiency, 8. Accountability | F. Community-based Information System, T. Logistics management information system                    |
| Medkit.Network Dr. Louis Somoni Machogu, dr.somoni@gmail.com                                  | Yes |     |     |  |  |     |     | Yes | 1. Information, 3. Quality                                        | C. Client applications, P. Identification registries and directories, U. Pharmacy information system |
| DawaSure francis munyeki, munyekif@cadcreations.co.ke                                         | Yes |     |     |  |  | Yes |     |     | 2. Availability, 5. Utilization                                   | C. Client applications, U. Pharmacy information system                                               |

|                                                                                                                                                      |  |     |     |  |  |  |     |     |                                                                   |                                                   |
|------------------------------------------------------------------------------------------------------------------------------------------------------|--|-----|-----|--|--|--|-----|-----|-------------------------------------------------------------------|---------------------------------------------------|
| Electronic Logistics Management and Inventory Management System<br>Monaheng Maoeng,<br>monaheng.maoeng@gov.ls                                        |  | Yes |     |  |  |  | Yes |     | 1. Information Availability, Efficiency, Accountability 2. 6. 8.  | T. Logistics and diagnostics information system   |
| cStock - EPI Erick Mwale,<br>Erick.Mwale@savethechildren.org                                                                                         |  | Yes |     |  |  |  | Yes |     | 1. Information, Availability, Efficiency, Accountability 2. 6. 8. | T. Logistics management information system (LMIS) |
| CMAM Stock Monitoring System Malawi Sylvester Kathuma,<br>kathumbasylvester@gmail.com                                                                |  |     | Yes |  |  |  | Yes |     | 1. Information, Availability, Efficiency, Accountability 2. 6. 8. | T. Logistics management information system (LMIS) |
| OpenLMIS Malawi Rebecca Alban, info@openlmis.org                                                                                                     |  | Yes | Yes |  |  |  | Yes |     | 1. Information, Availability, Efficiency, Accountability 2. 6. 8. | T. Logistics management information system (LMIS) |
| OpenLMIS Mozambique (SELV) Rebecca Alban, Info@openlmis.org                                                                                          |  | Yes | Yes |  |  |  | Yes |     | 1. Information, Availability, Efficiency, Accountability 2. 6. 8. | T. Logistics management information system (LMIS) |
| OpenLMIS Mozambique (SIGLUS) Rebecca Alban, Info@openlmis.org                                                                                        |  | Yes | Yes |  |  |  | Yes |     | 1. Information, Availability, Efficiency, Accountability 2. 6. 8. | T. Logistics management information system (LMIS) |
| PharmaDexMZ Kim Hoppenworth,<br>khoppenworth@mtapsprogram.org                                                                                        |  |     | Yes |  |  |  |     | Yes | 1. Information                                                    | U. Pharmacy Information System                    |
| Real-Time Monitoring of Moderna Vaccines in collaboration with National Primary Health Care Development Agency. Oghenetega Iortim,<br>tega@gricd.com |  | Yes | Yes |  |  |  | Yes |     | 1. Information, Quality 3.                                        | T. Logistics management information system (LMIS) |

|                                                                                                          |     |     |     |     |  |     |     |                                                                   |                                                                                                    |
|----------------------------------------------------------------------------------------------------------|-----|-----|-----|-----|--|-----|-----|-------------------------------------------------------------------|----------------------------------------------------------------------------------------------------|
| PHARMARUN IBITAYO TAIWO,<br>tayotaiwo83@yahoo.com                                                        | Yes |     |     |     |  |     | Yes | 2. Availability                                                   | C. Client applications                                                                             |
| Informed Push Model - Yeksi-Naa Melanie Joiner,<br>mjoiner@intrahealth.org                               |     |     | Yes |     |  |     | Yes | 1. Information, 2. Availability, 6. Efficiency, 8. Accountability | T. Logistics management information system (LMIS)                                                  |
| Senegal immunization supply chain Neeraj Thakare,<br>neeraj@logistimo.com                                |     |     | Yes |     |  | Yes |     | 1. Information, 2. Availability, 6. Efficiency, 8. Accountability | T. Logistics management information system (LMIS)                                                  |
| eLMIS Facility Edition (FE) Ashraf Islam,<br>ashraf_islam@jsi.com                                        |     |     | Yes |     |  |     |     | 1. Information, 2. Availability, 6. Efficiency, 8. Accountability | T. Logistics management information system (LMIS)                                                  |
| RxSolution Stephanie Xueref,<br>smxueref@msh.org                                                         |     | Yes | Yes |     |  | Yes |     | 1. Information, 2. Availability,                                  | T. Logistics management information system (LMIS)                                                  |
| Pharmaceutical Information Portal Stephanie Xueref,<br>smxueref@msh.org                                  |     |     |     | Yes |  |     | Yes | 1. Information                                                    | N. Health management information system                                                            |
| mTrac Uganda Carol Kyoziira,<br>ckyoziira@gmail.com                                                      |     | Yes | Yes |     |  |     |     | 1. Information, 2. Availability, 6. Efficiency, 8. Accountability | T. Logistics management information system (LMIS)                                                  |
| Electronic Inventory Management Services System (e-IMSS) Cliton Chikwata,<br>clinton.chikwata@tmcg.co.ug |     | Yes |     |     |  |     | Yes | 1. Information, 2. Availability                                   | T. Logistics management information system (LMIS)                                                  |
| Vaccine Information Management System (VIMS) Ssanyu Nyinondi,<br>snyinondi@tz.jsi.com                    |     |     | Yes | Yes |  |     | Yes | 2. Availability                                                   | T. Logistics management information system, G. Data interchange interoperability and accessibility |
| OpenLMIS Tanzania Rebecca Alban, Info@openlmis.org                                                       |     |     | Yes |     |  |     | Yes | 1. Information, 2. Availability ,6.                               | T. Logistics management information system (LMIS)                                                  |

|                                                                         |  |     |     |  |  |     |  |     |                                                                   |                                                                                            |
|-------------------------------------------------------------------------|--|-----|-----|--|--|-----|--|-----|-------------------------------------------------------------------|--------------------------------------------------------------------------------------------|
|                                                                         |  |     |     |  |  |     |  |     | Efficiency, 8. Accountability                                     |                                                                                            |
| AfyaIntelligence Harrison Mariki, afyaintelligence@gmail.com            |  | Yes | Yes |  |  |     |  | Yes | 1. Information, 2. Availability, 6. Efficiency 8. Accountability  | T. Logistics management information system (LMIS), N. Health management information system |
| eLMIS Facility Edition (FE) Wendy Bomett, wendy_bomett@zm.jsi.com       |  | Yes | Yes |  |  |     |  | Yes | 1. Information, 2. Availability ,6. Efficiency, 8. Accountability | T. Logistics management information system                                                 |
| Zambia immunization supply chain Arun Ramanujapuram, arun@logistimo.com |  | Yes | Yes |  |  | Yes |  |     | 1. Information, 2. Availability, 6. Efficiency, 8. Accountability | T. Logistics management information system                                                 |
| Supply chain information system                                         |  |     | Yes |  |  |     |  | Yes | 1. Information, 2. Availability, 6. Efficiency 8. Accountability  | T. Logistics management information system                                                 |
| Supply chain information system                                         |  | Yes | Yes |  |  |     |  | Yes | 1. Information, 2. Aailability, 6. Efficiency, 8. Accountability  | T. Logistics management information system                                                 |
| Supply chain information system                                         |  | Yes | Yes |  |  |     |  | Yes | 1. Information,2. Availability, 6. Efficiency, 8. Accountability  | T. Logistics management information system                                                 |
| Supply chain information system                                         |  | Yes | Yes |  |  |     |  | Yes | 1. Information,2. Availability, 6. Efficiency, 8. Accountability  | T. Logistics management information system                                                 |
| Supply chain information system                                         |  | Yes | Yes |  |  |     |  | Yes | 1. Information, 2. Availability, 6. Efficiency,8. Accountability  | T. Logistics management information system                                                 |
| Supply chain information system                                         |  | Yes | Yes |  |  |     |  | Yes | 1. Information, 2. Availability,6. Efficiency, 8. Accountability  | T. Logistics management information system                                                 |

|                                 |  |     |     |  |  |  |  |     |                                                                   |                                            |
|---------------------------------|--|-----|-----|--|--|--|--|-----|-------------------------------------------------------------------|--------------------------------------------|
| Supply chain information system |  | Yes | Yes |  |  |  |  | Yes | 1. Information, 2. Availability, 6. Efficiency, 8. Accountability | T. Logistics management information system |
| Supply chain information system |  | Yes | Yes |  |  |  |  | Yes | 1. Information, 2. Availability, 6. Efficiency, 8. Accountability | T. Logistics management information system |
| Supply chain information system |  | Yes | Yes |  |  |  |  | Yes | 1. Information, 2. Availability, 6. Efficiency, 8. Accountability | T. Logistics management information system |
| Supply chain information system |  | Yes | Yes |  |  |  |  | Yes | 1. Information, 2. Availability, 6. Efficiency, 8. Accountability | T. Logistics management information system |
| Supply chain information system |  | Yes | Yes |  |  |  |  | Yes | 1. Information, 2. Availability, 6. Efficiency, 8. Accountability | T. Logistics management information system |
| Supply chain information system |  | Yes | Yes |  |  |  |  | Yes | 1. Information, 2. Availability, 6. Efficiency, 8. Accountability | T. Logistics management information system |
| Supply chain information system |  | Yes | Yes |  |  |  |  | Yes | 1. Information, 2. Availability, 6. Efficiency, 8. Accountability | T. Logistics management information system |
| Supply chain information system |  | Yes | Yes |  |  |  |  | Yes | 1. Information, 2. Availability, 6. Efficiency, 8. Accountability | T. Logistics management information system |
| Supply chain information system |  | Yes | Yes |  |  |  |  | Yes | 1. Information, 2. Availability, 6. Efficiency, 8. Accountability | T. Logistics management information system |
| Supply chain information system |  | Yes | Yes |  |  |  |  | Yes | 1. Information, 2. Availability, 6. Efficiency, 8. Accountability | T. Logistics management information system |

|                                                                                                                 |  |     |  |  |  |     |     |  |                                  |                                                   |
|-----------------------------------------------------------------------------------------------------------------|--|-----|--|--|--|-----|-----|--|----------------------------------|---------------------------------------------------|
| Uber for Blood, McVeigh, K. 2018. "Uber for Blood": How rwandan Delivery robots Are Saving lives." The Guardian |  | Yes |  |  |  | Yes |     |  | 2. Availability, 6. Efficiency   | T. Logistics management information system        |
| mTrac UNICEF Uganda, 2011                                                                                       |  | Yes |  |  |  |     | Yes |  | 1. Information, 2. Availability, | T. Logistics management information system (LMIS) |
| mHealth application to strengthening pharmaceutical systems, Namisango et al; 2016                              |  | Yes |  |  |  | Yes |     |  | 1. Information, 6. Efficiency    | U. Pharmacy information system                    |

Table S7: Supplementary material: Digital Health Interventions used to strengthen Healthcare Finance in sub-Saharan Africa

| Name/Reference/<br>Point of contact                                                                                                                                                   | Target-User |           |          |               | Stage of development |       |             |         | Addressed Health System Challenge | Aligned Systems Category                                        |
|---------------------------------------------------------------------------------------------------------------------------------------------------------------------------------------|-------------|-----------|----------|---------------|----------------------|-------|-------------|---------|-----------------------------------|-----------------------------------------------------------------|
|                                                                                                                                                                                       | Clients     | Providers | Managers | Data Services | Informal             | Pilot | Established | Unknown |                                   |                                                                 |
| Implementation of a Performance-Based Financing Data System for Cameroon - using the open source tool Hesabu Mfouapon N Henock, National Data Manager of PBF, henockmfouapon@yahoo.fr |             |           | Yes      |               |                      |       | Yes         |         | 1. Information, 3. Quality        | C. Client applications, N. Health Management Information System |
| Providers System Federal Ministry of Health, dha@moh.gov.et                                                                                                                           |             |           | Yes      |               |                      |       | Yes         |         | 1. Information                    | M. Health finance and insurance system                          |

|                                                                                                       |     |     |     |  |  |     |     |     |                                    |                                                                |
|-------------------------------------------------------------------------------------------------------|-----|-----|-----|--|--|-----|-----|-----|------------------------------------|----------------------------------------------------------------|
| Members system Federal Ministry of Health, dha@moh.gov.et                                             |     |     | Yes |  |  |     | Yes |     | 1. information                     | M. Health finance and insurance system                         |
| IFMIS - Integrated Financial Management Information System Federal Ministry of Health, dha@moh.gov.et |     |     | Yes |  |  |     | Yes | Yes | 7.Cost                             | M Health finance and Insurance information system              |
| IBEX (Integrated Budget Expenditure System IBEX) Federal Ministry of Health, dha@moh.gov.et           |     |     | Yes |  |  |     | Yes |     | 7. Cost                            | M. Health finance and insurance information system             |
| CBHI (community based health insurance system ) Federal Ministry of Health, dha@moh.gov.et            |     |     | Yes |  |  |     | Yes |     | 1. Information, 7. Cost            | M. Health finance and insurance information system             |
| M-TIBA mobile health wallet Maarten Ras, m.ras@carepay.co.ke                                          | Yes |     |     |  |  |     | Yes |     | 7.Cost                             | C. Client application                                          |
| Connected Diagnostics for malaria Tobias Rinke de Wit, t.rinkedewit@pharmaccess.org                   |     | Yes |     |  |  | Yes |     |     | 1. Information, 7. Cost            | C. Client applications, R. Laboratory and Diagnostic System    |
| Digital Cash Advance for the health sector Tom Bouma, t.bouma@medicalcreditfund.org                   |     |     | Yes |  |  |     | Yes |     | 2. Availability                    | M. Health finance and insurance information system             |
| mTOMADY Jennifer Bencivenga, jb@mtomady.com                                                           | Yes | Yes |     |  |  | Yes |     |     | 7.Cost                             | M. Health finance an insurane information system               |
| CarePay mobile health wallet Steve Maina, s.maina@carepay.co.ke                                       | Yes |     |     |  |  | Yes |     |     | 7. Cost                            | M. Health finance and insurance information system             |
| Lafya HealthShare Nanlir Kapnan, kapnan@lafya.co                                                      | Yes |     |     |  |  | Yes |     |     | 1. Information, 3. Quality,7. Cost | C. Client applications, M. Health finance and insurance system |
| ulerawa luke shors, lshors@icloud.com                                                                 |     |     | Yes |  |  | Yes |     |     | 7. Cost                            | M. Health finance and insurance information system             |





|                                                               |     |  |  |  |  |     |  |  |         |                                                                           |
|---------------------------------------------------------------|-----|--|--|--|--|-----|--|--|---------|---------------------------------------------------------------------------|
| i-PUSH, Abajobir et al; 2021                                  | Yes |  |  |  |  | Yes |  |  | 7.Cost  | C. Client application, M. Health finance and insurance information system |
| The Mobile Maternal Health Wallet (MMHW), Lacroze et al; 2021 | Yes |  |  |  |  | Yes |  |  | 7. Cost | M. Health finance and insurance information system                        |

Table S8: Supplementary material: Digital Health Interventions used to Leadership and Governance strengthen in sub-Saharan Africa

| Name/Reference/<br>Point of contact                                                     | Target-User |           |          |               | Stage of development |       |             |         | Addressed Health System Challenge | Aligned Systems Category                                                     |
|-----------------------------------------------------------------------------------------|-------------|-----------|----------|---------------|----------------------|-------|-------------|---------|-----------------------------------|------------------------------------------------------------------------------|
|                                                                                         | Clients     | Providers | Managers | Data Services | Informal             | Pilot | Established | Unknown |                                   |                                                                              |
| Building a national health map in a week Yaw Anokwa, yanokwa@nafundi.com                |             |           | Yes      |               |                      |       | Yes         |         | 1. Information                    | P. Identification registries and directories, W. Research information system |
| Community Scorecard App_Mozambique Robert Worthington, rob@kwantu.net                   |             | Yes       |          |               |                      | Yes   |             |         | 1. Information 8. Accountability  | F. Community-based Information System                                        |
| Automation and AI for Health Campaign Planning Sangeeta Jobanputra, sraja@connecti3.com |             |           | Yes      |               |                      | Yes   |             |         | 1. Information, 6. Efficiency     | T. Logistics management information system (LMIS)                            |
